# Supplementary material for: Acetylome of Acinetobacter baumannii SK17 Reveals a Highly-Conserved Modification of Histone-Like Protein HU
Source: PubMed Central journal article supplement (PMC5711770; doi:10.3389/fmolb.2017.00077), 2017-11-27

**Table S1. Lysine acetylation site found in both *A. baumannii* SK17-S and SK17-R.**

| Protein Group Accessions | Protein Description                                                                                                             | Sequence                                  | Confidence | ATCC 17978 |
|--------------------------|---------------------------------------------------------------------------------------------------------------------------------|-------------------------------------------|------------|------------|
| 470.191.peg.1037         | Contig157_24634_25878 3-carboxymuconate cyclase                                                                                 | HMVFSPNG <b>kac</b> QAYITAEMR             | High       |            |
| 470.191.peg.1176         | Contig168_1593_2234 Fumarylacetoacetate hydrolase family protein                                                                | DLQNEL <b>kac</b> DK                      | High       | Y          |
| 470.191.peg.13           | Contig1_8229_8996 FIG00350940: hypothetical protein                                                                             | GGKGTGGGFQGGG <b>kac</b> GGAPTGMK         | Medium     |            |
| 470.191.peg.1307         | Contig175_18025_19329 DcaP                                                                                                      | LGLDFNTPVGGDD <b>kac</b> VGGK             | Medium     |            |
| 470.191.peg.1331         | Contig18_12932_14128 Dihydroliipoamide succinyltransferase component (E2) of 2-oxoglutarate dehydrogenase complex (EC 2.3.1.61) | KQY <b>kac</b> DAFEK                      | High       |            |
| 470.191.peg.1479         | Contig193_2500_4002 filamentation induced by cAMP protein Fic                                                                   | KGGHDVDED <b>kac</b> VK*                  | High       |            |
| 470.191.peg.1865         | Contig232_10208_10654 LSU ribosomal protein L9p                                                                                 | AGDEG <b>kac</b> LFGSIGTR                 | High       |            |
| 470.191.peg.1976         | Contig251_22308_24452 Phosphate acetyltransferase (EC 2.3.1.8)                                                                  | <b>kac</b> GKLNLDLQAK                     | High       | Y          |
| 470.191.peg.2241         | Contig41_9570_8092 D-serine/D-alanine/glycine transporter                                                                       | EDQGP <b>kac</b> AFGKLNLR                 | Medium     |            |
| 470.191.peg.227          | Contig112_8198_8962 Beta 1,4 glucosyltransferase                                                                                | NNQYSNL <b>kac</b> ALEK                   | Medium     |            |
| 470.191.peg.2279         | Contig42_11710_12591 FIG00351805: hypothetical protein                                                                          | <b>kac</b> RGSVSEKPK                      | Medium     |            |
| 470.191.peg.2396         | Contig47_8217_8489 DNA-binding protein HU                                                                                       | SELIDAI <b>kac</b> GGVSK                  | High       | Y          |
| 470.191.peg.252          | Contig112_35507_34794 Glycerophosphoryl diester phosphodiesterase (EC 3.1.4.46)                                                 | AVRDMAL <b>kac</b> EKLIQK                 | Medium     |            |
| 470.191.peg.2561         | Contig54_6359_8554 TRAP-type C4-dicarboxylate transport system, large permease component                                        | HPNIDAQV <b>kac</b> EQMK                  | High       |            |
| 470.191.peg.2616         | Contig6_23804_22917 Chromosome (plasmid) partitioning protein ParB / Stage 0 sporulation protein J                              | DWSE <b>kac</b> QE <b>kac</b> EK          | High       |            |
| 470.191.peg.2692         | Contig67_3550_3050 FIG00351518: hypothetical protein                                                                            | VQGE <b>kac</b> ALEDLK                    | High       |            |
| 470.191.peg.2836         | Contig73_16322_17938 Probable conserved transmembrane protein                                                                   | FMPA <b>kac</b> T <b>kac</b> ENSK         | High       |            |
| 470.191.peg.2868         | Contig75_21794_22951 2-methylcitrate synthase (EC 2.3.3.5)                                                                      | A <b>kac</b> LKALR                        | High       |            |
| 470.191.peg.2991         | Contig85_8947_7877 Outer membrane protein A precursor                                                                           | VAE <b>kac</b> LSEYPNATAR                 | High       |            |
|                          |                                                                                                                                 | LSTQGF <del>AWDQPIADN</del> <b>kac</b> TK | High       |            |
| 470.191.peg.300          | Contig114_13490_14449 Phenylacetic acid degradation operon negative regulatory protein PaaX                                     | NDWLCSD <b>kac</b> IGR                    | Medium     |            |
| 470.191.peg.723          | Contig139_20080_19049 Arginine N-succinyltransferase (EC 2.3.1.109)                                                             | RENQNG <b>kac</b> FLSK                    | Medium     |            |
| 470.191.peg.852          | Contig148_548_78 FIG00351502: hypothetical protein                                                                              | LDMSLMP <b>kac</b> YKNK                   | High       |            |

\* Peptide GGHDVDED**kac**VK was identified in SK17-R with high confidence.

**Table S2. Lysine acetylation site found only in *A. baumannii* SK17-S.**

| Protein Group Accessions | Protein Description                                                                                                                         | Sequence                                          | Confidence | ATCC 17978 |
|--------------------------|---------------------------------------------------------------------------------------------------------------------------------------------|---------------------------------------------------|------------|------------|
| 470.191.peg.1002         | Contig156_23370_24188 FIG00350748: hypothetical protein                                                                                     | LSVYSEYMQTLLQSQHSLHK <b>kac</b> QIA               | Medium     |            |
| 470.191.peg.1007         | Contig156_29632_28895 FIG00351138: hypothetical protein                                                                                     | <b>Skac</b> DSSRFSINPVNADDSVPQGTNTK               | Medium     |            |
| 470.191.peg.1063         | Contig158_18927_18631 LSU ribosomal protein L25p                                                                                            | AEDKQ <b>Gkac</b> GASR                            | Medium     |            |
| 470.191.peg.113          | Contig104_5919_5050 FIG00349932: hypothetical protein                                                                                       | MELQGICH <b>kac</b> MHAGLK                        | Medium     |            |
| 470.191.peg.1132         | Contig163_29742_30359 Predicted transcriptional regulator LiuX of leucine degradation pathway, AcrR family                                  | FDHAH <b>kac</b> DYFS <b>kac</b> QIADFCVDAVQK     | Medium     |            |
| 470.191.peg.1211         | Contig170_6767_6204 Cyclohexanone monooxygenase (EC 1.14.13.22)                                                                             | SDSYTALQRAN <b>ckac</b> LQTPWPIVK                 | High       |            |
| 470.191.peg.1225         | Contig170_21037_20459 NAD(P)H-flavin oxidoreductase                                                                                         | LDDPQ <b>kac</b> LEHCGVELFYQKDLTSPLVSGCIAWLVCK    | High       |            |
| 470.191.peg.1263         | Contig173_6283_7617 GTP-binding protein HflX                                                                                                | QAVQECLMGQLQHFLSLV <b>kac</b> PAYGKLR             | Medium     |            |
| 470.191.peg.1324         | Contig18_5227_3953 Citrate synthase (si) (EC 2.3.3.1)                                                                                       | MLDEIGSVENVAEFME <b>kac</b> VK                    | High       |            |
| 470.191.peg.1331         | Contig18_12932_14128 Dihydrolipoamide succinyltransferase component (E2) of 2-oxoglutarate dehydrogenase complex (EC 2.3.1.61)              | MIDG <b>kac</b> EAVGFLVAIK                        | High       |            |
| 470.191.peg.1342         | Contig180_5378_4476 putative ATP/GTP-binding protein                                                                                        | FGLQINFYGFSQQEYLVTVQYWLNEY <b>kac</b> WQQR        | Medium     |            |
| 470.191.peg.1381         | Contig185_3192_1714 Aspartyl-tRNA(Asn) amidotransferase subunit A (EC 6.3.5.6) @ Glutamyl-tRNA(Gln) amidotransferase subunit A (EC 6.3.5.7) | QPASFCGLTGL <b>kac</b> PTYGR                      | Medium     |            |
| 470.191.peg.1410         | Contig186_21638_22459 Dihydrodipicolinate reductase (EC 1.3.1.26)                                                                           | YDM <b>kac</b> DVLGLNDVQV                         | Medium     |            |
| 470.191.peg.1437         | Contig188_2299_35 TonB-dependent receptor; Outer membrane receptor for ferrienterochelin and colicins                                       | GMGPENTLILVDG <b>kac</b> PINSRNSVR                | Medium     |            |
| 470.191.peg.1448         | Contig19_9429_11063 Heat shock protein 60 family chaperone GroEL                                                                            | SIAKPADD <b>kac</b> AIEQVGSISANSDDTTVGK           | High       |            |
| 470.191.peg.1479         | Contig193_2500_4002 filamentation induced by cAMP protein Fic                                                                               | MTQ <b>kac</b> NELDTK                             | High       | Y          |
| 470.191.peg.1551         | Contig201_639_1595 DnaJ-class molecular chaperone CbpA                                                                                      | <b>Ekac</b> DAEE <b>kac</b> MQAINVAYDTLSNPEK      | Medium     |            |
| 470.191.peg.1558         | Contig201_13879_10181 Exodeoxyribonuclease V beta chain (EC 3.1.11.5)                                                                       | HVSGTIFRNGAFN <b>kac</b> LFSECLPQLLQVLK           | Medium     |            |
| 470.191.peg.1615         | Contig21_4982_4602 putative signal peptide                                                                                                  | GNGYKVDY <b>kac</b> DNLPL <b>kac</b> PDR          | Medium     |            |
| 470.191.peg.1707         | Contig219_16579_14054 Outer membrane protein assembly factor YaeT precursor                                                                 | <b>Ekac</b> MAASLEALR                             | Medium     |            |
| 470.191.peg.1712         | Contig219_21307_20753 Ribosome recycling factor                                                                                             | <b>Ekac</b> EISEDERR                              | Medium     |            |
| 470.191.peg.1713         | Contig219_22121_21393 Uridylate kinase (EC 2.7.4.-)                                                                                         | LGVMDLTAICLCRDHNVPLQVFDMN <b>kac</b> SGALLSVVMGEK | Medium     |            |
| 470.191.peg.1714         | Contig219_23516_22173 Ribosomal protein S12p Asp88 (E. coli) methylthiotransferase                                                          | L <b>kac</b> IK                                   | High       |            |
| 470.191.peg.1733         | Contig22_9195_8263 4-hydroxyproline epimerase (EC 5.1.1.8)                                                                                  | SPCGTGTS <b>kac</b> IACLAADGK                     | Medium     |            |
| 470.191.peg.1734         | Contig22_10008_9364 Predicted regulator PutR for proline utilization, GntR family                                                           | QDEIA <b>kac</b> LFNVSKIPVR                       | Medium     |            |
| 470.191.peg.1776         | Contig221_44818_43409 FIG00608533: hypothetical protein                                                                                     | <b>Skac</b> TAETSSTENQIR                          | High       |            |

| Protein Group Accessions | Protein Description                                                                                                          | Sequence                                                    | Confidence | ATCC 17978 |
|--------------------------|------------------------------------------------------------------------------------------------------------------------------|-------------------------------------------------------------|------------|------------|
| 470.191.peg.1803         | Contig224_13401_11638 Phosphodiesterase/alkaline phosphatase D                                                               | FGNKVSPVGQT <b>kac</b> TLPTSTNK                             | Medium     |            |
| 470.191.peg.1811         | Contig224_19937_19350 FIG00350330: hypothetical protein                                                                      | AVSTKATQV <b>kac</b> EVVAEK                                 | Medium     |            |
| 470.191.peg.1833         | Contig23_2901_3539 TniB NTP-binding protein                                                                                  | ASDPEA <b>kac</b> LRNQAVHLMR                                | Medium     |            |
| 470.191.peg.1836         | Contig23_5576_4725 Universal stress protein                                                                                  | MSKIIACIDGSLVTNTVCDYAAWFSD <b>kac</b> LNSPIK                | Medium     |            |
| 470.191.peg.1837         | Contig23_7076_5589 Sulfate permease                                                                                          | E <b>kac</b> QGQGVANVASGFLGGMAGCAMILGQSIINV <b>kac</b> SGGR | Medium     |            |
| 470.191.peg.1846         | Contig230_864_124 hypothetical protein                                                                                       | LFMLF <b>kac</b> TDEFDIE <b>kac</b> QEFFK                   | Medium     |            |
| 470.191.peg.1914         | Contig25_2928_2011 Permease of the drug/metabolite transporter (DMT) superfamily                                             | LFSSQ <b>kac</b> NCEKQA                                     | High       |            |
| 470.191.peg.1982         | Contig251_31338_30004 Cell division trigger factor (EC 5.2.1.8)                                                              | QVEKP <b>kac</b> LPEIDAEFLK                                 | Medium     |            |
| 470.191.peg.2053         | Contig3_18190_18882 Hypothetical protein YggS, proline synthase co-transcribed bacterial homolog PROSC                       | DGCAPEdVAELVAQMSQLP <b>kac</b> IK                           | Medium     |            |
| 470.191.peg.2065         | Contig3_32907_34892 Gamma-glutamyltranspeptidase (EC 2.3.2.2)                                                                | YMVVANTPLAV <b>kac</b> AGCDVLK                              | High       |            |
| 470.191.peg.2101         | Contig32_18364_16538 FIG00351490: hypothetical protein                                                                       | MGQL <b>kac</b> ILELR                                       | Medium     |            |
| 470.191.peg.2119         | Contig34_5891_6109 FIG00352022: hypothetical protein                                                                         | NLVEHENEPL <b>kac</b> LSQR                                  | High       |            |
| 470.191.peg.218          | Contig111_34274_36511 Isocitrate dehydrogenase [NADP] (EC 1.1.1.42); Monomeric isocitrate dehydrogenase [NADP] (EC 1.1.1.42) | VALQEGEIIDSMFMS <b>kac</b> <b>kac</b> ALCDFYEK              | High       |            |
| 470.191.peg.2230         | Contig40_80_1147 DUF1176 domain-containing protein                                                                           | <b>kac</b> GSANENQVLMPEPK                                   | High       |            |
| 470.191.peg.2241         | Contig41_9570_8092 D-serine/D-alanine/glycine transporter                                                                    | EDQGPKAFG <b>kac</b> LNLR                                   | Medium     |            |
| 470.191.peg.229          | Contig112_10895_10005 FIG00350869: hypothetical protein                                                                      | YQQAK <b>kac</b> AK                                         | High       |            |
|                          |                                                                                                                              | IDSTWYMIPESSAN <b>kac</b> TIELWKCTDFPMK                     | High       |            |
| 470.191.peg.2332         | Contig45_73_3858 Phage tail length tape-measure protein 1                                                                    | RADNDIAIA <b>kac</b> QALR                                   | Medium     |            |
| 470.191.peg.2484         | Contig52_10670_9786 Ribose-phosphate pyrophosphokinase (EC 2.7.6.1)                                                          | ICAVGQAFSLDVM <b>kac</b> LLNINADK                           | Medium     |            |
| 470.191.peg.2596         | Contig6_8370_6697 SSU ribosomal protein S1p                                                                                  | LADEVEATL <b>kac</b> ASEINR                                 | High       |            |
| 470.191.peg.2693         | Contig67_3837_5900 Methionyl-tRNA synthetase (EC 6.1.1.10)                                                                   | EAGNIAVRPVTQLFDPE <b>kac</b> GMFLSDR                        | High       |            |
| 470.191.peg.2836         | Contig73_16322_17938 PROBABLE CONSERVED TRANSMEMBRANE PROTEIN                                                                | VCEQGYERPDI MF <b>kac</b> HNGTICSLCK                        | High       |            |
| 470.191.peg.2920         | Contig79_20208_19204 Dihydroorotate dehydrogenase (EC 1.3.3.1)                                                               | MGFNNDGVD <b>kac</b> LIENVKASK                              | High       |            |
| 470.191.peg.2988         | Contig85_4648_6108 Lysine-specific permease                                                                                  | NKT <b>kac</b> LIPYDQMDVKPEQD                               | Medium     |            |
| 470.191.peg.2989         | Contig85_6385_7590 Protein RtcB                                                                                              | GATVGSVIPT <b>kac</b> HAIIPAAVGVDIGCGMNAILRLSK              | Medium     |            |
| 470.191.peg.3015         | Contig91_103_660 hypothetical protein                                                                                        | NSISN <b>kac</b> SINK                                       | Medium     |            |
| 470.191.peg.3021         | Contig91_5379_4519 Short-chain dehydrogenase/reductase SDR                                                                   | KPISPEYMAQAI <b>kac</b> GVQR                                | Medium     |            |
| 470.191.peg.3078         | Contig99_3760_4611 transcriptional regulator, LysR family                                                                    | FGRP <b>kac</b> DDYLIAR                                     | Medium     |            |
| 470.191.peg.312          | Contig116_1189_98 ABC-type multidrug transport system, permease component                                                    | LIFLATIGVIFLITAYSRL <b>kac</b> VFK                          | Medium     |            |
| 470.191.peg.369          | Contig119_6564_5869 ortholog of Bordetella pertussis (BX470248) BP2475                                                       | DSSLSKEQQ <b>kac</b> LLK                                    | Medium     |            |

| Protein Group Accessions | Protein Description                                                                                         | Sequence                                          | Confidence | ATCC 17978 |
|--------------------------|-------------------------------------------------------------------------------------------------------------|---------------------------------------------------|------------|------------|
| 470.191.peg.383          | Contig119_25850_25224 Superoxide dismutase [Fe] (EC 1.15.1.1)                                               | ETLEYHHD <b>kac</b> HHNTYVVNLNLIK                 | High       |            |
| 470.191.peg.412          | Contig120_2240_102 Translation elongation factor G                                                          | EFFGAVD <b>kac</b> GIQER                          | High       |            |
| 470.191.peg.451          | Contig122_12416_13300 Aldehyde dehydrogenase (EC 1.2.1.3)                                                   | VVFALDT <b>kac</b> GQQWLLR                        | Medium     |            |
| 470.191.peg.519          | Contig127_7069_8442 UDP-N-acetylmuramate:L-alanyl-gamma-D-glutamyl-meso-diaminopimelate ligase (EC 6.3.2.-) | ACEALSNFGGV <b>kac</b> R                          | Medium     |            |
| 470.191.peg.522          | Contig127_10813_11769 Integral membrane protein TerC                                                        | FL <b>kac</b> GQEEETNIEDIKLLK                     | Medium     |            |
| 470.191.peg.553          | Contig128_903_496 Gfa-like protein                                                                          | SDLEIVQGENLLQAYFASP <b>kac</b> KR                 | Medium     |            |
| 470.191.peg.564          | Contig128_12431_13693 benzoate-specific porin                                                               | FTL <b>kac</b> NAYINRDFDNDALK                     | Medium     |            |
| 470.191.peg.569          | Contig129_5437_3209 Helicase PriA essential for oriC/DnaA-independent DNA replication                       | KGLVDCTLEPHDFSPSPVQLAQMPLTLNEDQ <b>kac</b> K      | High       |            |
| 470.191.peg.629          | Contig132_11281_9203 type IV pilus biogenesis protein PilJ                                                  | LAERSASAT <b>kac</b> QIETLVK                      | Medium     |            |
| 470.191.peg.635          | Contig133_4973_3300 High-affinity choline uptake protein BetT                                               | NDSLEESPPE <b>kac</b> SSLQVIEK                    | High       |            |
| 470.191.peg.657          | Contig134_8982_9626 FIG00350418: hypothetical protein                                                       | YYSGADGT <b>kac</b> LLVLDDENR                     | Medium     |            |
| 470.191.peg.711          | Contig139_6603_8672 Glycyl-tRNA synthetase beta chain (EC 6.1.1.14)                                         | TLPEAAALAAAN <b>kac</b> R                         | Medium     |            |
| 470.191.peg.843          | Contig147_13098_12508 TolA protein                                                                          | <b>kac</b> WMVQVALAPNQNK                          | High       |            |
| 470.191.peg.893          | Contig152_4020_6302 Ferrichrome-iron receptor                                                               | FDQGTFAHTLSLFEI <b>kac</b> kacPSAYTDLVTNIYTSGGEQR | Medium     |            |
| 470.191.peg.905          | Contig152_22296_21049 PROTEIN ERFK/SRFK                                                                     | GLYYTRVSEMLGE <b>kac</b> FHIDEAFLK                | Medium     |            |



**Table S3. Lysine acetylation site found only in *A. baumannii* SK17-R.**

| Protein Group Accessions | Protein Description                                                                                     | Sequence                                          | Confidence |
|--------------------------|---------------------------------------------------------------------------------------------------------|---------------------------------------------------|------------|
| 470.191.peg.1003         | Contig156_24307_25602 Acyl-CoA dehydrogenase; probable dibenzothiophene desulfurization enzyme          | KYYTTGSLYADWVDVGVTDL <b>kac</b> GESGSVVVR         | High       |
| 470.191.peg.1026         | Contig157_11877_10309 3-ketoacyl-CoA thiolase (EC 2.3.1.16) @ Acetyl-CoA acetyltransferase (EC 2.3.1.9) | MS <b>kac</b> TTQENPAVENSAQEK                     | Medium     |
| 470.191.peg.1027         | Contig157_12113_13504 3-oxoacyl-[acyl-carrier protein] reductase (EC 1.1.1.100)                         | IVCVSSISGIAGNLGQTNYAAS <b>kac</b> AGVIGLVKFTAPILK | Medium     |
| 470.191.peg.1038         | Contig157_26179_26682 Low molecular weight protein tyrosine phosphatase (EC 3.1.3.48)                   | <b>kac</b> RGYDLSSLR                              | Medium     |
| 470.191.peg.1187         | Contig168_12785_11334 tRNA-i(6)A37 methylthiotransferase                                                | TDAMLG <b>kac</b> IER                             | Medium     |
| 470.191.peg.1241         | Contig171_4318_5211 LysR-family transcriptional regulator clustered with PA0057                         | SNDVNALYDMCLHAQGVAMLPDLL <b>kac</b> DLK           | Medium     |
| 470.191.peg.1286         | Contig174_13273_10175 RND multidrug efflux transporter; Acriflavin resistance protein                   | MTVEEFPNIDFPFVVVTTQYAGASPEAVESDIT <b>kac</b> K    | Medium     |
| 470.191.peg.1389         | Contig185_9930_8545 Wax ester synthase/acyl-CoA:diacylglycerol acyltransferase                          | <b>kac</b> PLIAMVPASLRDSDSDVSNRITMILANLGTHK       | Medium     |
| 470.191.peg.1408         | Contig186_19876_20988 Chaperone protein DnaJ                                                            | <b>kac</b> TITFTAPAPCDVCDGK                       | Medium     |
| 470.191.peg.1543         | Contig20_9673_10818 Aldose 1-epimerase (EC 5.1.3.3)                                                     | FSLD <b>kac</b> TYNLEK                            | Medium     |
| 470.191.peg.1646         | Contig212_61_345 hypothetical protein                                                                   | SIAAMVNGMCKQCG <b>kac</b> EPLQAIVSDK              | Medium     |
| 470.191.peg.2009         | Contig263_318_40 FIG00350892: hypothetical protein                                                      | MLD <b>kac</b> LLLLQPCLY <b>kac</b> K             | Medium     |
| 470.191.peg.2109         | Contig33_443_2989 Nitrite reductase [NAD(P)H] large subunit (EC 1.7.1.4)                                | CT <b>kac</b> AATACGGCAPLVQTQVLK                  | Medium     |
| 470.191.peg.2158         | Contig35_4517_9214 FIG00350631: hypothetical protein                                                    | GYLFID <b>kac</b> GR                              | Medium     |
| 470.191.peg.2177         | Contig38_9085_7736 Permeases of the major facilitator superfamily                                       | GQQLNQSGQVDQVKFTQCLQ <b>kac</b> IK                | High       |
| 470.191.peg.2229         | Contig4_31958_30366 lipid A phosphoethanolamine transferase                                             | QE <b>kac</b> ASRLLLK                             | Medium     |
| 470.191.peg.2410         | Contig5_1566_2231 Ribosomal large subunit pseudouridine synthase A (EC 4.2.1.70)                        | HYIALVQGGV <b>kac</b> QEGSVEAPLITDWENRPR          | Medium     |
| 470.191.peg.2423         | Contig5_15931_16821 3-hydroxyisobutyrate dehydrogenase (EC 1.1.1.31)                                    | NIVHCGDVGAGQIA <b>kac</b> ICNNLILGISMAAFAEGMALGVK | Medium     |
| 470.191.peg.25           | Contig1_16328_16879 FIG00351865: hypothetical protein                                                   | LYHELLMDACAHAHLIEDW <b>kac</b> GVVFAEIVDGGK       | Medium     |
| 470.191.peg.2546         | Contig53_39489_41306 Translation elongation factor LepA                                                 | MAQA <b>kac</b> k <b>kac</b> SVDIK                | Medium     |
| 470.191.peg.2596         | Contig6_8370_6697 SSU ribosomal protein S1p                                                             | AKDEAE <b>kac</b> EAVANLR                         | High       |
| 470.191.peg.2662         | Contig62_11813_10323 FIG076926: outer membrane protein                                                  | AEWMHFISADKAF <b>kac</b> LEASK                    | Medium     |
| 470.191.peg.2730         | Contig68_306_1892 Cytochrome d ubiquinol oxidase subunit I (EC 1.10.3.-)                                | EVTGL <b>kac</b> DLMQQHEVR                        | Medium     |
| 470.191.peg.2792         | Contig7_5508_5711 FIG00354137: hypothetical protein                                                     | MDNS <b>kac</b> LPINQIARINDAAK                    | Medium     |
| 470.191.peg.2802         | Contig70_8382_8921 FIG027190: Putative transmembrane protein                                            | AELWSWR <b>kac</b> TPEGR                          | Medium     |
| 470.191.peg.2807         | Contig70_14414_13581 hypothetical protein                                                               | QELDIE <b>kac</b> CGVSSLCVHPGGIR                  | Medium     |

| Protein Group Accessions | Protein Description                                                                                                                                | Sequence                                      | Confidence |
|--------------------------|----------------------------------------------------------------------------------------------------------------------------------------------------|-----------------------------------------------|------------|
| 470.191.peg.2845         | Contig74_4385_3702 ATP phosphoribosyltransferase (EC 2.4.2.17)                                                                                     | CkacLMTAGkacVGMERPK                           | Medium     |
| 470.191.peg.2851         | Contig75_1005_2108 Poly(glycerol-phosphate) alpha-glucosyltransferase (EC 2.4.1.52)                                                                | LEEKacVILLGR                                  | Medium     |
| 470.191.peg.2897         | Contig78_5828_4458 Biotin carboxylase of acetyl-CoA carboxylase (EC 6.3.4.14)                                                                      | MLQkacVLIANR                                  | Medium     |
| 470.191.peg.2933         | Contig8_3951_4577 merops peptidase family S24                                                                                                      | QVDLALATGkacSK                                | Medium     |
| 470.191.peg.2992         | Contig85_9428_9844 putative type 4 fimbrial biogenesis protein FimT                                                                                | MASVELkacNTPR                                 | Medium     |
| 470.191.peg.3067         | Contig98_286_1530 Beta-lactamase (EC 3.5.2.6)                                                                                                      | IVDDLkacVSLGALK                               | Medium     |
| 470.191.peg.376          | Contig119_18623_17082 Di-/tripeptide transporter                                                                                                   | QEANSCSkacPVVENkacNAPK                        | Medium     |
| 470.191.peg.452          | Contig122_13616_13732 hypothetical protein                                                                                                         | TGVLANHMEGkacSGLGSLSSSVLVQHAPG                | Medium     |
| 470.191.peg.555          | Contig128_3879_1408 Lead, cadmium, zinc and mercury transporting ATPase (EC 3.6.3.3) (EC 3.6.3.5); Copper-translocating P-type ATPase (EC 3.6.3.4) | VEkacALK                                      | Medium     |
| 470.191.peg.764          | Contig141_11916_11380 nucleoprotein/polynucleotide-associated enzyme                                                                               | ANIEkacAQK                                    | Medium     |
| 470.191.peg.884          | Contig151_6218_8974 Aconitate hydratase (EC 4.2.1.3)                                                                                               | LAIYDAAMRYQQEHTPLVIIAGkacEYGTGSSR             | Medium     |
| 470.191.peg.964          | Contig154_21357_22694 K(+)-uptake protein KtrB, integral membrane subunit; Potassium uptake protein TrkH                                           | GITPDLHNGSLFILLLMFAGRLGPLTLAYLIATP <b>kac</b> | Medium     |

**Table S4. Cellular localization and putative function of the acetylated proteins found in *A. baumannii* SK17-S and SK17-R.**

| Accession Number | Cellular Localization | Putative Function         |
|------------------|-----------------------|---------------------------|
| 470.191.peg.1002 | cytoplasm             | unknown                   |
| 470.191.peg.1003 | cytoplasm             | unknown                   |
| 470.191.peg.1007 | outer membrane        | unknown                   |
| 470.191.peg.1026 | cytoplasm             | metabolism (amino acid)   |
| 470.191.peg.1027 | cytoplasm             | metabolism (energy)       |
| 470.191.peg.1037 | unknown               | unknown                   |
| 470.191.peg.1038 | cytoplasm             | unknown                   |
| 470.191.peg.1063 | cytoplasm             | translation               |
| 470.191.peg.113  | cytoplasm             | unknown                   |
| 470.191.peg.1132 | cytoplasm             | transcription regulation  |
| 470.191.peg.1176 | cytoplasm             | metabolism (energy)       |
| 470.191.peg.1187 | cytoplasm             | metabolism (nucleotide)   |
| 470.191.peg.1211 | cytoplasm             | unknown                   |
| 470.191.peg.1225 | unknown               | metabolism (energy)       |
| 470.191.peg.1241 | cytoplasm             | unknown                   |
| 470.191.peg.1263 | cytoplasm             | unknown                   |
| 470.191.peg.1286 | cytoplasmic membrane  | virulence & defense       |
| 470.191.peg.13   | cytoplasm             | unknown                   |
| 470.191.peg.1307 | outer membrane        | unknown                   |
| 470.191.peg.1324 | cytoplasm             | metabolism (carbohydrate) |
| 470.191.peg.1331 | cytoplasm             | metabolism (carbohydrate) |
| 470.191.peg.1342 | cytoplasm             | unknown                   |
| 470.191.peg.1381 | cytoplasm             | metabolism (protein)      |
| 470.191.peg.1389 | cytoplasm             | metabolism (energy)       |
| 470.191.peg.1408 | cytoplasm             | metabolism (protein)      |
| 470.191.peg.1410 | cytoplasm             | metabolism (amino acid)   |
| 470.191.peg.1437 | outer membrane        | membrane transport        |
| 470.191.peg.1448 | cytoplasm             | metabolism (protein)      |
| 470.191.peg.1479 | cytoplasm             | unknown                   |
| 470.191.peg.1543 | periplasmic           | metabolism (carbohydrate) |
| 470.191.peg.1551 | cytoplasm             | metabolism (protein)      |
| 470.191.peg.1558 | cytoplasm             | metabolism (nucleotide)   |
| 470.191.peg.1615 | unknown               | unknown                   |
| 470.191.peg.1646 | unknown               | unknown                   |
| 470.191.peg.1707 | outer membrane        | unknown                   |
| 470.191.peg.1712 | cytoplasm             | metabolism (protein)      |
| 470.191.peg.1713 | cytoplasm             | unknown                   |
| 470.191.peg.1714 | cytoplasm             | metabolism (nucleotide)   |
| 470.191.peg.1733 | cytoplasm             | metabolism (amino acid)   |
| 470.191.peg.1734 | cytoplasm             | metabolism (amino acid)   |
| 470.191.peg.1776 | outer membrane        | unknown                   |
| 470.191.peg.1803 | extracellular         | unknown                   |
| 470.191.peg.1811 | cytoplasm             | unknown                   |
| 470.191.peg.1833 | cytoplasm             | unknown                   |
| 470.191.peg.1836 | cytoplasm             | stress response           |
| 470.191.peg.1837 | cytoplasmic membrane  | metabolism (amino acid)   |
| 470.191.peg.1846 | cytoplasm             | unknown                   |
| 470.191.peg.1865 | cytoplasm             | translation               |
| 470.191.peg.1914 | cytoplasmic membrane  | unknown                   |
| 470.191.peg.1976 | cytoplasm             | metabolism (carbohydrate) |
| 470.191.peg.1982 | cytoplasm             | metabolism (protein)      |
| 470.191.peg.2009 | unknown               | unknown                   |
| 470.191.peg.2053 | cytoplasm             | metabolism (amino acid)   |
| 470.191.peg.2065 | periplasmic           | metabolism (amino acid)   |

| Accession Number | Cellular Localization | Putative Function                       |
|------------------|-----------------------|-----------------------------------------|
| 470.191.peg.2101 | unknown               | unknown                                 |
| 470.191.peg.2109 | cytoplasm             | metabolism (energy)                     |
| 470.191.peg.2119 | cytoplasm             | unknown                                 |
| 470.191.peg.2158 | outer membrane        | unknown                                 |
| 470.191.peg.2177 | cytoplasmic membrane  | membrane transport                      |
| 470.191.peg.218  | cytoplasm             | metabolism (carbohydrate)               |
| 470.191.peg.2229 | cytoplasmic membrane  | unknown                                 |
| 470.191.peg.2230 | periplasmic           | unknown                                 |
| 470.191.peg.2241 | cytoplasmic membrane  | metabolism (carbohydrate)               |
| 470.191.peg.227  | cytoplasm             | metabolism (energy)                     |
| 470.191.peg.2279 | unknown               | unknown                                 |
| 470.191.peg.229  | cytoplasm             | unknown                                 |
| 470.191.peg.2332 | outer membrane        | transposable & extrachromosomal element |
| 470.191.peg.2396 | cytoplasm             | metabolism (nucleotide)                 |
| 470.191.peg.2410 | cytoplasm             | metabolism (nucleotide)                 |
| 470.191.peg.2423 | cytoplasm             | metabolism (amino acid)                 |
| 470.191.peg.2484 | cytoplasm             | metabolism (carbohydrate)               |
| 470.191.peg.25   | cytoplasm             | unknown                                 |
| 470.191.peg.252  | cytoplasm             | metabolism (carbohydrate)               |
| 470.191.peg.2546 | cytoplasmic membrane  | translation                             |
| 470.191.peg.2561 | cytoplasmic membrane  | membrane transport                      |
| 470.191.peg.2596 | cytoplasm             | translation                             |
| 470.191.peg.2616 | cytoplasm             | cellular process                        |
| 470.191.peg.2662 | outer membrane        | cellular process                        |
| 470.191.peg.2692 | unknown               | unknown                                 |
| 470.191.peg.2693 | cytoplasm             | metabolism (protein)                    |
| 470.191.peg.2730 | cytoplasmic membrane  | cellular process                        |
| 470.191.peg.2792 | unknown               | unknown                                 |
| 470.191.peg.2802 | unknown               | unknown                                 |
| 470.191.peg.2807 | cytoplasm             | unknown                                 |
| 470.191.peg.2836 | cytoplasmic membrane  | unknown                                 |
| 470.191.peg.2845 | cytoplasm             | metabolism (amino acid)                 |
| 470.191.peg.2851 | cytoplasm             | cell wall & capsule                     |
| 470.191.peg.2868 | cytoplasm             | metabolism (carbohydrate)               |
| 470.191.peg.2897 | cytoplasm             | metabolism (energy)                     |
| 470.191.peg.2920 | cytoplasmic membrane  | metabolism (nucleotide)                 |
| 470.191.peg.2933 | unknown               | metabolism (protein)                    |
| 470.191.peg.2988 | cytoplasmic membrane  | membrane transport                      |
| 470.191.peg.2989 | cytoplasm             | metabolism (nucleotide)                 |
| 470.191.peg.2991 | outer membrane        | stress response                         |
| 470.191.peg.2992 | cytoplasm             | unknown                                 |
| 470.191.peg.300  | unknown               | metabolism (energy)                     |
| 470.191.peg.3015 | cytoplasm             | unknown                                 |
| 470.191.peg.3021 | cytoplasm             | stress response                         |
| 470.191.peg.3067 | unknown               | virulence & defense                     |
| 470.191.peg.3078 | cytoplasm             | transcription regulation                |
| 470.191.peg.312  | cytoplasmic membrane  | membrane transport                      |
| 470.191.peg.369  | cytoplasm             | unknown                                 |
| 470.191.peg.376  | cytoplasmic membrane  | membrane transport                      |
| 470.191.peg.383  | periplasmic           | stress response                         |
| 470.191.peg.412  | cytoplasm             | metabolism (protein)                    |
| 470.191.peg.451  | cytoplasm             | metabolism (carbohydrate)               |
| 470.191.peg.452  | unknown               | unknown                                 |
| 470.191.peg.519  | cytoplasm             | cell wall & capsule                     |
| 470.191.peg.522  | cytoplasmic membrane  | unknown                                 |
| 470.191.peg.553  | cytoplasm             | unknown                                 |
| 470.191.peg.555  | cytoplasmic membrane  | virulence & defense                     |

| Accession Number | Cellular Localization | Putative Function         |
|------------------|-----------------------|---------------------------|
| 470.191.peg.564  | outer membrane        | metabolism (energy)       |
| 470.191.peg.569  | cytoplasm             | metabolism (nucleotide)   |
| 470.191.peg.629  | outer membrane        | unknown                   |
| 470.191.peg.635  | cytoplasmic membrane  | unknown                   |
| 470.191.peg.657  | unknown               | unknown                   |
| 470.191.peg.711  | cytoplasm             | metabolism (protein)      |
| 470.191.peg.723  | cytoplasm             | metabolism (amino acid)   |
| 470.191.peg.764  | cytoplasm             | unknown                   |
| 470.191.peg.843  | cytoplasm             | membrane transport        |
| 470.191.peg.852  | unknown               | unknown                   |
| 470.191.peg.884  | cytoplasm             | metabolism (carbohydrate) |
| 470.191.peg.893  | outer membrane        | membrane transport        |
| 470.191.peg.905  | unknown               | cell wall & capsule       |
| 470.191.peg.964  | cytoplasmic membrane  | metabolism (energy)       |

**Table S5. Lysine acetylation site found in both *A. baumannii* SK17-S and SK17-R.**

| Protein Sequence | Presence of His tag | $k_{on}$<br>( $\times 10^4 \text{ M}^{-1} \text{ s}^{-1}$ ) | $k_{off}$<br>( $\times 10^{-3} \text{ s}^{-1}$ ) | $K_D$<br>(nM) |
|------------------|---------------------|-------------------------------------------------------------|--------------------------------------------------|---------------|
| wild-type        | No                  | 8.53 $\pm$ 2.39                                             | 22.2 $\pm$ 12.0                                  | 276 $\pm$ 143 |
| wild-type        | C terminus          | 11.7 $\pm$ 5.5                                              | 21.6 $\pm$ 9.2                                   | 349 $\pm$ 352 |
| K13ac            | C terminus          | 2.60 $\pm$ 1.43                                             | 3.92 $\pm$ 0.74                                  | 184 $\pm$ 9.3 |

Note: Data analysis were performed using ForteBio Data Analysis Software with a 1:1 Langmuir binding model. Values shown here are average  $\pm$  standard deviation calculated from experimental triplicate.

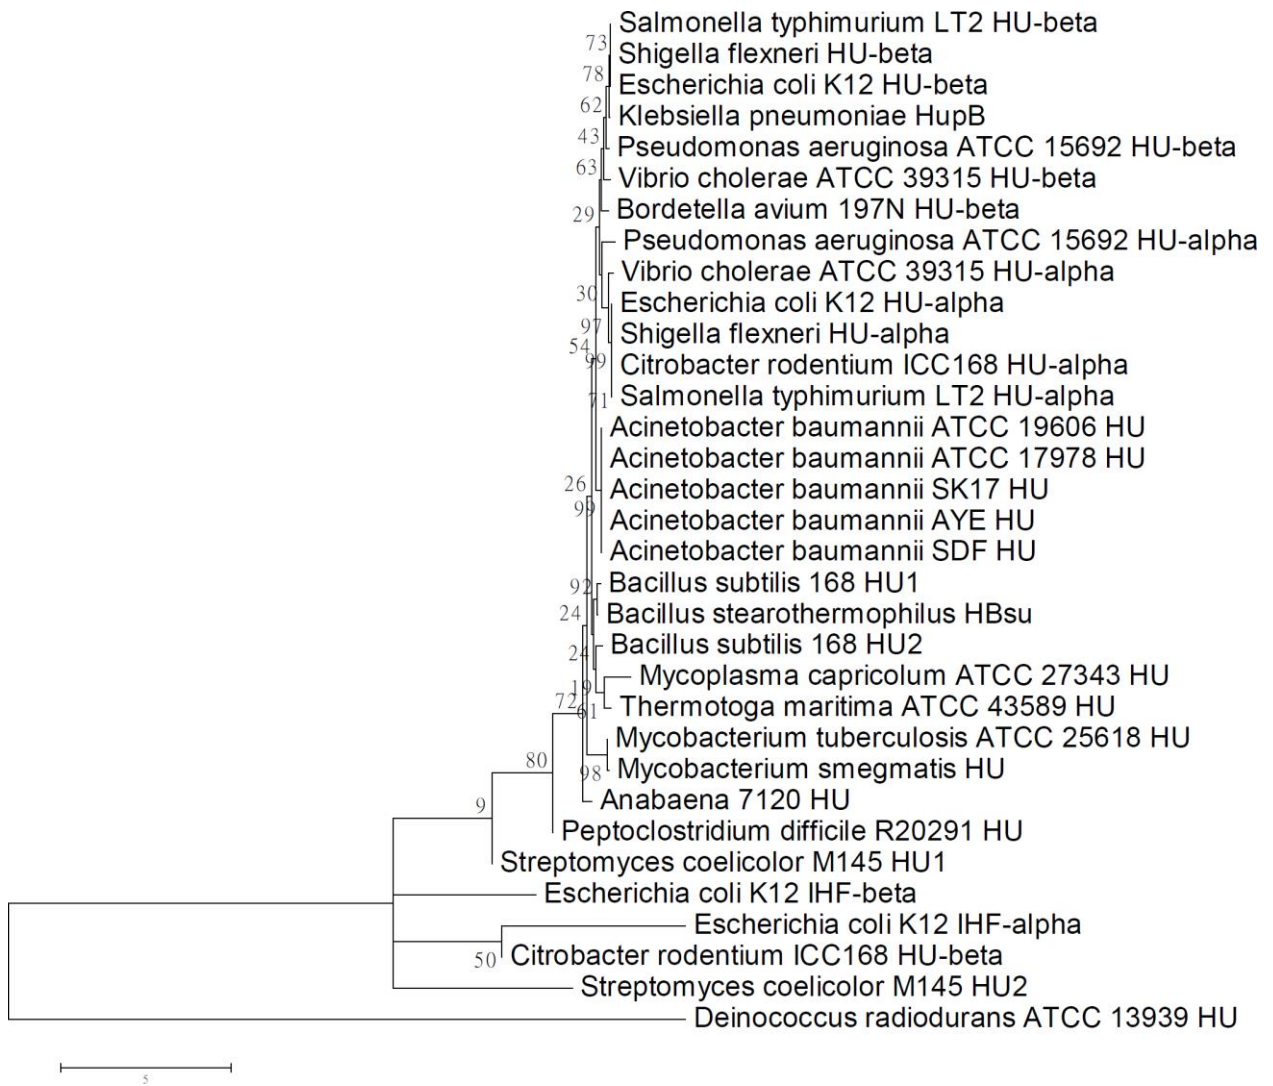

**Figure S1.** Phylogenetic tree of HU homologs.

A. baumannii SK17 HU  
A. baumannii ATCC19606 HU  
A. baumannii ATCC17978 HU  
A. baumannii AYE HU  
A. baumannii SDF HU  
P. aeruginosa PA14 HUβ  
E. coli K12 HUβ  
S. flexneri HUβ  
S. typhimurium LT2 HUβ  
C. rodentium ICC168 HUβ  
K. pneumoniae HupB  
V. cholerae ATCC39315 HUβ  
B. avium 197N HUβ  
V. cholerae ATCC39315 HUα  
E. coli K12 HUα  
S. flexneri HUα  
C. rodentium ICC168 HUα  
S. typhimurium LT2 HUα  
B. stearothermophilus HBsu  
B. subtilis 168 HU1  
B. subtilis 168 HU2  
T. maritima ATCC43589 HU  
P. difficile R20291 HU  
P. aeruginosa PA14 HUα  
V. parahaemolyticus HUβ  
V. parahaemolyticus HU2  
G. kaustophilus HU  
T. thermophilus HB8 HU  
Anabaena 7120 HU  
S. coelicolor M145 HU1  
M. tuberculosis H37Ra HU  
M. smegmatis HU  
S. coelicolor M145 HU2  
M. capricolum ATCC27343 HU  
D. radiodurans ATCC13939 HU  
E. coli K12 IHFα

-----MNKSELIDATAEKGGVSKTDAGKALDA  
-----MNKSELIDATAEKGGVSKTDAGKALDA  
-----MNKSELIDATAEKGGVSKTDAGKALDA  
-----MNKSELIDATAEKGGVSKTDAGKALDA  
-----MNKSELIDATAEKGGVSKTDAGKALDA  
-----MNKSELIDATAASADIPKAVAGRALDA  
-----MNKSQLIDKIAAGADISKAAAGRALDA  
-----MNKSQLIDKIAAGADISKAAAGRALDA  
-----MNKSQLIEKIAAGADISKAAAGRALDA  
-----MRKRVRNKSQIDKIAAGADISKAAAGRALDA  
-----MNKSQLIDKIAAGADISKAAAGRALDA  
-----MNKTQLVEQIAANADISKASAGRALDA  
-----MNKTELIDHIASKADISKAAAGRALDA  
-----MNKTQLIDFIAEKADLTKKVQAAKAALES  
-----MNKTQLIDVIAEKAELESKTQAKAALES  
-----MNKTQLIDVIAEKAELESKTQAKAALES  
-----MNKTQLIDVIADKAELESKTQAKAALES  
-----MNKTQLIDVIADKAELESKTQAKAALES  
-----MNKTELINAVAESELSKDATKAVDA  
-----MNKTELINAVAESELSKDATKAVDS  
-----MNKTELIAKVAEKQGVSKKEGAPSVK  
-----MTKKELIDRVAKKAGAKKDVKILIDT  
-----MNKAEVLVSKMAEKSGLTKKEAALNA  
-----MRKPELAAAIAEKADLTKEQANRVLNA  
-----MNKTQLVEQIAENADISKASAGRALDA  
-----MNKTQLIDFIAEKADLSKAQAKAALES  
-----MNKTELINAVAESELSKDATKAVDA  
-----MAAKKTVTKADLVQVAQTGLKKKDVKAMVDA  
-----MNKSELVDAVAEKASVTKKQADAVLTA  
-----MNRSELVAALADRAEVTRKDADAVLAA  
-----MNKAEILIDVLTQKLGSDRRQATAAVEN  
-----MNKAEILIDVLTTKMGTDRRQATAAVEN  
-----MNKAEILVLAIAADKLG-GRQQAADAVDA  
-----MTKKELINKIALETEVSKKEVNLIIVKK  
MTKKSTKPAKKAAPAAPAAKAAKRAAASGKVAKTQLVEMVADQTLTKKQSEEAATSS  
-----MALTKAEMSEYLFDKLGLSKRDAKELVEL

A. baumannii SK17 HU  
A. baumannii ATCC19606 HU  
A. baumannii ATCC17978 HU  
A. baumannii AYE HU  
A. baumannii SDF HU  
P. aeruginosa PA14 HUβ  
E. coli K12 HUβ  
S. flexneri HUβ  
S. typhimurium LT2 HUβ  
C. rodentium ICC168 HUβ  
K. pneumoniae HupB  
V. cholerae ATCC39315 HUβ  
B. avium 197N HUβ  
V. cholerae ATCC39315 HUα  
E. coli K12 HUα  
S. flexneri HUα  
C. rodentium ICC168 HUα  
S. typhimurium LT2 HUα  
B. stearothermophilus HBsu  
B. subtilis 168 HU1  
B. subtilis 168 HU2  
T. maritima ATCC43589 HU  
P. difficile R20291 HU  
P. aeruginosa PA14 HUα  
V. parahaemolyticus HUβ  
V. parahaemolyticus HU2  
G. kaustophilus HU  
T. thermophilus HB8 HU  
Anabaena 7120 HU  
S. coelicolor M145 HU1  
M. tuberculosis H37Ra HU  
M. smegmatis HU  
S. coelicolor M145 HU2  
M. capricolum ATCC27343 HU  
D. radiodurans ATCC13939 HU  
E. coli K12 IHFα

TIASITEALKKGD-TVTLVGFGTFSVKERAARTGRNPK-TGEEELQIKATKVPSPFKAGKGL  
TIASITEALKKGD-TVTLVGFGTFSVKERAARTGRNPK-TGEEELQIKATKVPSPFKAGKGL  
TIASITEALKKGD-TVTLVGFGTFSVKERAARTGRNPK-TGEEELQIKATKVPSPFKAGKGL  
TIASITEALKKGD-TVTLVGFGTFSVKERAARTGRNPK-TGEEELQIKATKVPSPFKAGKGL  
TIASITEALKKGD-TVTLVGFGTFSVKERAARTGRNPK-TGEEELQIKATKVPSPFKAGKGL  
VIESVTGALKAGD-SVVLVGFGTFAVKERAARTGRNPQ-TGKPIKIAAAKIPGFKAGKAL  
IIASVTESLKEGD-DVALVGFGTFAVKERAARTGRNPQ-TGKEITIAAAKVPSPFRAGKAL  
IIASVTESLKEGD-DVALVGFGTFAVKERAARTGRNPQ-TGKEITIAAAKVPSPFRAGKAL  
IIASVTESLKEGD-DVALVGFGTFAVKERAARTGRNPQ-TGKEITIAAAKVPSPFRAGKAL  
IIASVTESLQAGD-DVALVGFGTFAVKERAARTGRNPQ-TGKEITIAAAKVPSPFRAGKAL  
FIEAVSGTLQSGD-QVALVGFGTFSVRTRAARTGRNPK-TGEEIKIAEAKVSPFKAGKAL  
LIGAVKTLKKKG-TVTLVGFGTFAVSSRAARTGRNPR-TGETIKIAAKVPSPFRAGKAL  
TLGAVEGALKDGD-QVQLIGFGTFFKVNHRSAARTGRNPK-TGEEIKIAAANVPFAVAGKAL  
TLAAITESLKEGD-AVQLVGFGTFFKVNHRSAARTGRNPQ-TGKEIKIAAANVPFAVSGKAL  
TLAAITESLKEGD-AVQLVGFGTFFKVNHRSAARTGRNPQ-TGKEIKIAAANVPFAVSGKAL  
TLAAITESLKEGD-AVQLVGFGTFFKVNHRSAARTGRNPQ-TGKEIKIAAANVPFAVSGKAL  
TLAAITESLKEGD-AVQLVGFGTFFKVNHRSAARTGRNPQ-TGEEIEIPASKVPAFKPGKAL  
VFDTIILDALKNGD-KIQLIGFGNFEVREARSARKGRNPQ-TGEEIEIPASKVPAFKPGKAL  
VFDTISEALKSGE-KVSIPIGFGTFFVREARSARKGRNPQ-TGEEIIPATKAPAFKPKAKAL  
ILETITEALAKGE-KVQIVGFGSFEVRRKAAARKGVNPQ-TRKPIITIPERKVPFKPGKAL  
FMSSVQDALVNE-KVQLVGFGTFFETREARSARKGRNPQ-TGEEIIPASKVPAFKAGKGL  
LLDEITGALNRKD-SVTLVGFGTFLQRHRGARTGKNPQ-TGQPVKIKASNTVAFKPGKAL  
FIEAVSGTLQSGD-QVALVGFGTFSVRTRAARTGRNPK-TGEEIQIAEAKVPAFKAGKAL  
TLEGVTGALKDGD-QVQLIGFGTFFKVNHRSAARTGRNPK-TGDEIQIAAANVPFAVAGKAL  
VFSITTEALRKGD-KVQLIGFGNFEVREARSARKGRNPQ-TGEEIEIPASKVPAFKPGKAL  
LLAKVEEALANGS-KVQLTGFGTFFVRRKRKARTGVKPG-TKEIKIPATQYPAFKPGKAL  
ALETITEAVSSGD-KVTLVGFSGFSERERKAREGRNPK-TNEKMEIPATRVPAFSAGKLF  
FAEVVGDIVSKGDEKVTIPGFLTFERTHRAARTARNPQ-TGEPQIPAGYSVKVPSAGSKL  
VVDTIVRAVHKGD-SVTITGFGVFEQRRAARVARNPR-TGETVVKVPTSVPAFRPGAQF  
VVDTIVRAVHKGD-SVTITGFGVFEQRRAARVARNPR-TGETVVKVPTSVPAFRPGAQF  
VLDALVRAVAGD-RVSVTFGSGFEKVDPRPARARNPQ-TGERVVKVPTSVPRFRAGQGF  
VFELISKNLLDKK-EVLISDFGKFTILQKVSRRKGVNPI-TRQKMPIPASKTVKFKPSKQL  
MLECVVSALQSGK-SVGLPGLGTLVSKETAARTGVRPG-TSEKIQIPAGKVVAFKVAATL  
FFEEIRRALENGE-QVKLSGFGNFDLRDKNRQGRNPK-TGEDIPITARRVPTFRPGQKL



A. baumannii SK17 HU KDSVA-----  
 A. baumannii ATCC19606 HU KDSVA-----  
 A. baumannii ATCC17978 HU KDSVA-----  
 A. baumannii AYE HU KDSVA-----  
 A. baumannii SDF HU KDSVA-----  
 P. aeruginosa PA14 HUβ KDAVN-----  
 E. coli K12 HUβ **K**DAVN-----  
 S. flexneri HUβ KDAVN-----  
 S. typhimurium LT2 Huβ KDAVN-----  
 C. rodentium ICC168 HUβ KDAVN-----  
 K. pneumoniae HupB KDAVN-----  
 V. cholerae ATCC39315 Huβ KDACN-----  
 B. avium 197N Huβ KDAVN-----  
 V. cholerae ATCC39315 Huα KDAIK-----  
 E. coli K12 HUα **K**DAVK-----  
 S. flexneri HUα KDAVK-----  
 C. rodentium ICC168 HUα KDAVK-----  
 S. typhimurium LT2 HUα KDAVK-----  
 B. stearothermophilus HBsu KDAVK-----  
 B. subtilis 168 HU1 KDAVAGK-----  
 B. subtilis 168 HU2 KDAVKAK-----  
 T. maritima ATCC43589 HU KEKVK-----  
 P. difficile R20291 HU KDIING-----  
 P. aeruginosa PA14 HUα RDAVN-----  
 V. parahaemolyticus Huβ KDACN-----  
 V. parahaemolyticus HU2 KEACND-----  
 G. kaustophilus HU KDAVK-----  
 T. thermophilus HB8 HU KDKVKK-----  
 Anabaena 7120 HU REKVAPPKA-----  
 S. coelicolor M145 HU1 KEAAK GK-----  
 M. tuberculosis H37Ra HU **K**AVVSGAQR LPAEGPAV**K**RGVGASA AKKVA**K**KAPAKKATKA AKKAA-**T**KAPARKAATKAP  
 M. smegmatis HU KAVISGAQKLPADGPAVKRGV TAGPAKKA AKKAP-----AKKAAA-KKTATKAAA AKKAP  
 S. coelicolor M145 HU2 KDLVSGSKKLPKNDIAVKKAPKGSLSGPPPTI SKAAGKKA AKKATGA AKKTTGA AKKTS  
 M. capricolum ATCC27343 HU KELLIKE-----  
 D. radiodurans ATCC13939 HU KGNL-----  
 E. coli K12 IHFα KSRVENASPKDE-----

A. baumannii SK17 HU -----  
 A. baumannii ATCC19606 HU -----  
 A. baumannii ATCC17978 HU -----  
 A. baumannii AYE HU -----  
 A. baumannii SDF HU -----  
 P. aeruginosa PA14 HUβ -----  
 E. coli K12 HUβ -----  
 S. flexneri HUβ -----  
 S. typhimurium LT2 Huβ -----  
 C. rodentium ICC168 HUβ -----  
 K. pneumoniae HupB -----  
 V. cholerae ATCC39315 Huβ -----  
 B. avium 197N Huβ -----  
 V. cholerae ATCC39315 Huα -----  
 E. coli K12 HUα -----  
 S. flexneri HUα -----  
 C. rodentium ICC168 HUα -----  
 S. typhimurium LT2 HUα -----  
 B. stearothermophilus HBsu -----  
 B. subtilis 168 HU1 -----  
 B. subtilis 168 HU2 -----  
 T. maritima ATCC43589 HU -----  
 P. difficile R20291 HU -----  
 P. aeruginosa PA14 HUα -----  
 V. parahaemolyticus Huβ -----  
 V. parahaemolyticus HU2 -----  
 G. kaustophilus HU -----  
 T. thermophilus HB8 HU -----  
 Anabaena 7120 HU -----  
 S. coelicolor M145 HU1 -----  
 M. tuberculosis H37Ra HU **A**KKAATKAPAKKAVKATKSPAK**K**VTKAVKKTAVKASVRKAATKAPAKKA-AAKRPATKAP  
 M. smegmatis HU AKKAATKAPAKKAATKAPAKKAATKAPAKKAATKAPAKKAAAKAPAKKA-ATKAPAKKAA  
 S. coelicolor M145 HU2 AAAKKTAKKTTGA AKKTTAKKTTAKKSA AKKTTAAAKKTA AKKAPAKKATAKAPAKKST  
 M. capricolum ATCC27343 HU -----  
 D. radiodurans ATCC13939 HU -----  
 E. coli K12 IHFα -----

|                                   |                |
|-----------------------------------|----------------|
| A. baumannii_SK17_HU              | -----          |
| A. baumannii_ATCC19606_HU         | -----          |
| A. baumannii_ATCC17978_HU         | -----          |
| A. baumannii_AYE_HU               | -----          |
| A. baumannii_SDF_HU               | -----          |
| P. aeruginosa_PA14_HU $\beta$     | -----          |
| E. coli_K12_HU $\beta$            | -----          |
| S. flexneri_HU $\beta$            | -----          |
| S. typhimurium_LT2_Hu $\beta$     | -----          |
| C. rodentium_ICC168_HU $\beta$    | -----          |
| K. pneumoniae_HupB                | -----          |
| V. cholerae_ATCC39315_Hu $\beta$  | -----          |
| B. avium_197N_Hu $\beta$          | -----          |
| V. cholerae_ATCC39315_Hu $\alpha$ | -----          |
| E. coli_K12_HU $\alpha$           | -----          |
| S. flexneri_HU $\alpha$           | -----          |
| C. rodentium_ICC168_HU $\alpha$   | -----          |
| S. typhimurium_LT2_HU $\alpha$    | -----          |
| B. stearothermophilus_HBsu        | -----          |
| B. subtilis_168_HU1               | -----          |
| B. subtilis_168_HU2               | -----          |
| T. maritima_ATCC43589_HU          | -----          |
| P. difficile_R20291_HU            | -----          |
| P. aeruginosa_PA14_HU $\alpha$    | -----          |
| V. parahaemolyticus_Hu $\beta$    | -----          |
| V. parahaemolyticus_HU2           | -----          |
| G. kaustophilus_HU                | -----          |
| T. thermophilus_HB8_HU            | -----          |
| Anabaena_7120_HU                  | -----          |
| S. coelicolor_M145_HU1            | -----          |
| M. tuberculosis_H37Ra_HU          | AKKATARRGRK--- |
| M. smegmatis_HU                   | AKKAPAKKGRR--- |
| S. coelicolor_M145_HU2            | ARKTTAKKATARKK |
| M. capricolum_ATCC27343_HU        | -----          |
| D. radiodurans_ATCC13939_HU       | -----          |
| E. coli_K12_IHF $\alpha$          | -----          |

**Figure S2.** Sequence alignment of different bacterial HU homologs to *A. baumannii* SK17 HU. Residues in red indicate acetylation sites found in *A. baumannii* ATCC19606 (1), *B. subtilis* 168 (2), *E. coli* K12 (3) and BW25113 (4), *G. kaustophilus* (5), *M. tuberculosis* H37Ra (6,7), *P. aeruginosa* PA14 (8), *T. thermophilus* HB8 (9) and *V. parahaemolyticus* (10).

**A**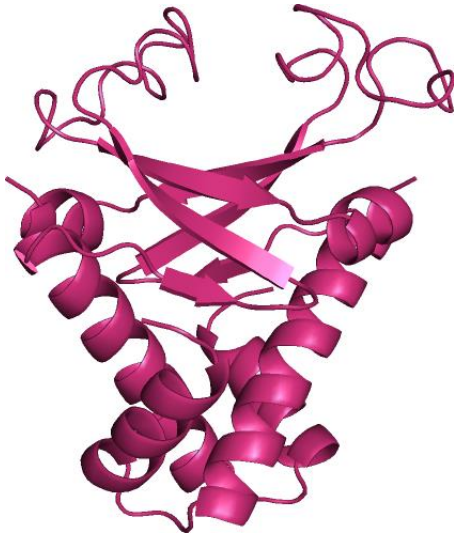**B**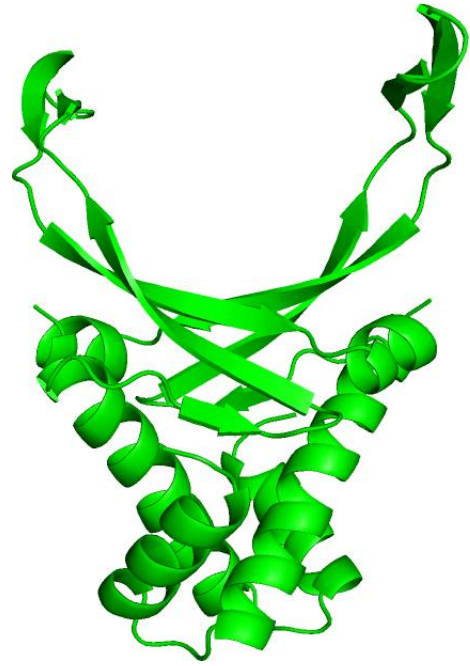**C**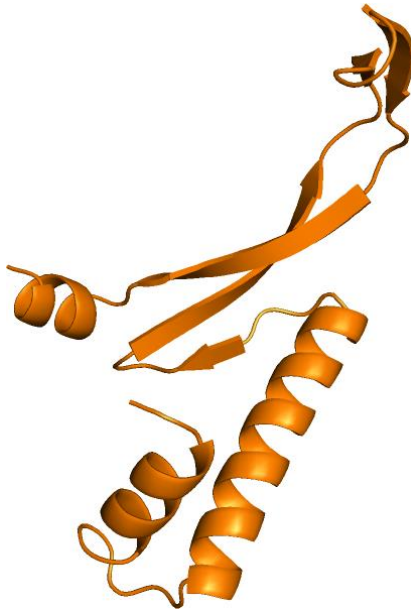**D**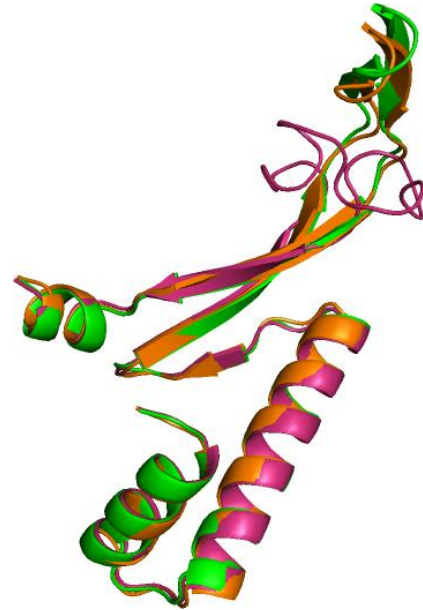

**Figure S3.** Homology models of *A. baumannii* HU. *A.* Homology model generated by SWISS-MODEL using pdb 4P3V as the template. *B.* Homology model generated by SWISS-MODEL using pdb 1P51 as the template. *C.* Homology model generated by I-TASSER. *D.* Alignment of one subunit of the three homology models.

**A HU with C-terminal His tag**

MNKSELIDAIAEKGGVSKTDAGKALDATIASITEALKKGDVTLVGFGTFSVKERAARTGRNPKTGEELQIK  
KVPSFKAGKGLKDSVALEHHHHH (calculated MW = 10386.82)

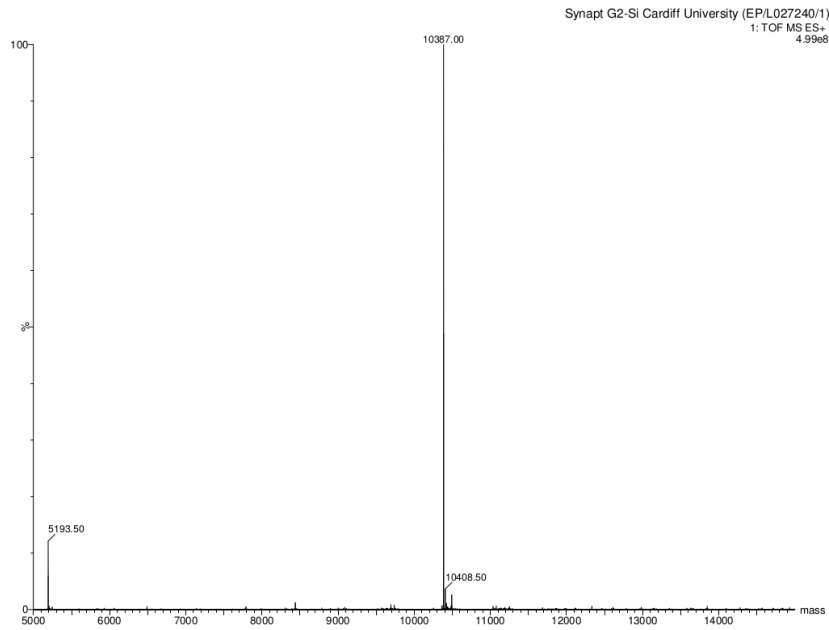

**B HU(K13ac) with C-terminal His tag**

MNKSELIDAIAEKacGGVSKTDAGKALDATIASITEALKKGDVTLVGFGTFSVKERAARTGRNPKTGEELQIK  
ATKVPSFKAGKGLKDSVALEHHHHH (calculated MW = 10428.86)

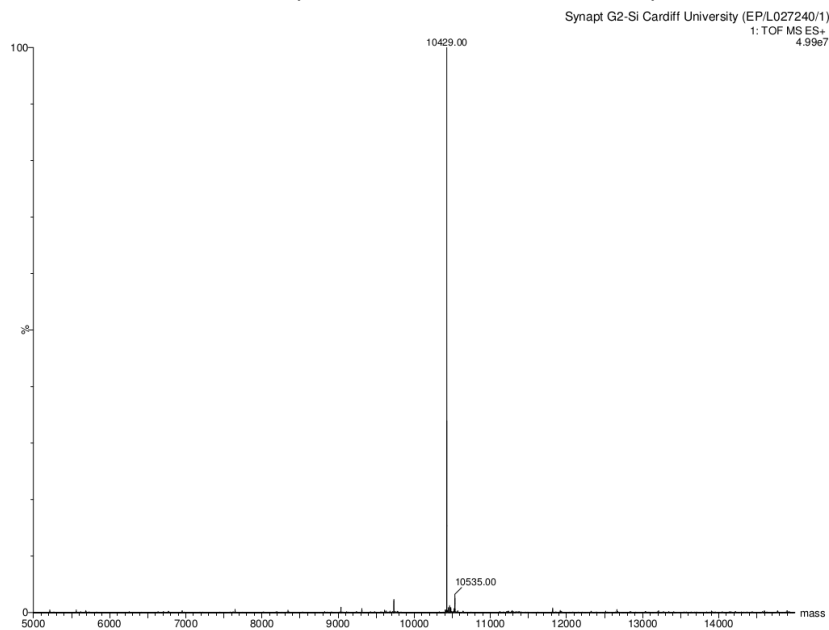

**C LC chromatogram of peptides from tryptic digestion of HU and HU(K13ac)**

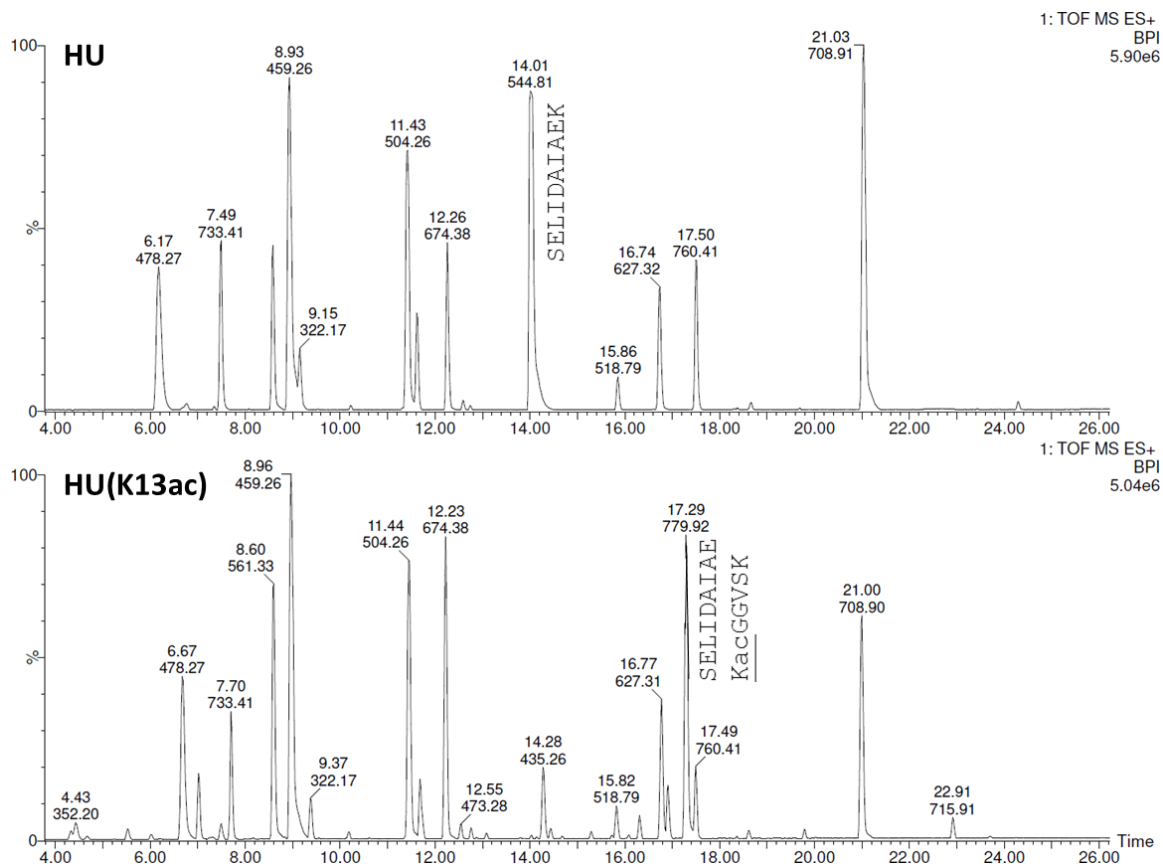

**D HR-MS of SELIDAIKKacGGVSK peptide**

Calculated mass for C<sub>67</sub>H<sub>116</sub>N<sub>17</sub>O<sub>25</sub> = 1558.8328, observed mass = 1558.8398 (+ 4.5 ppm)

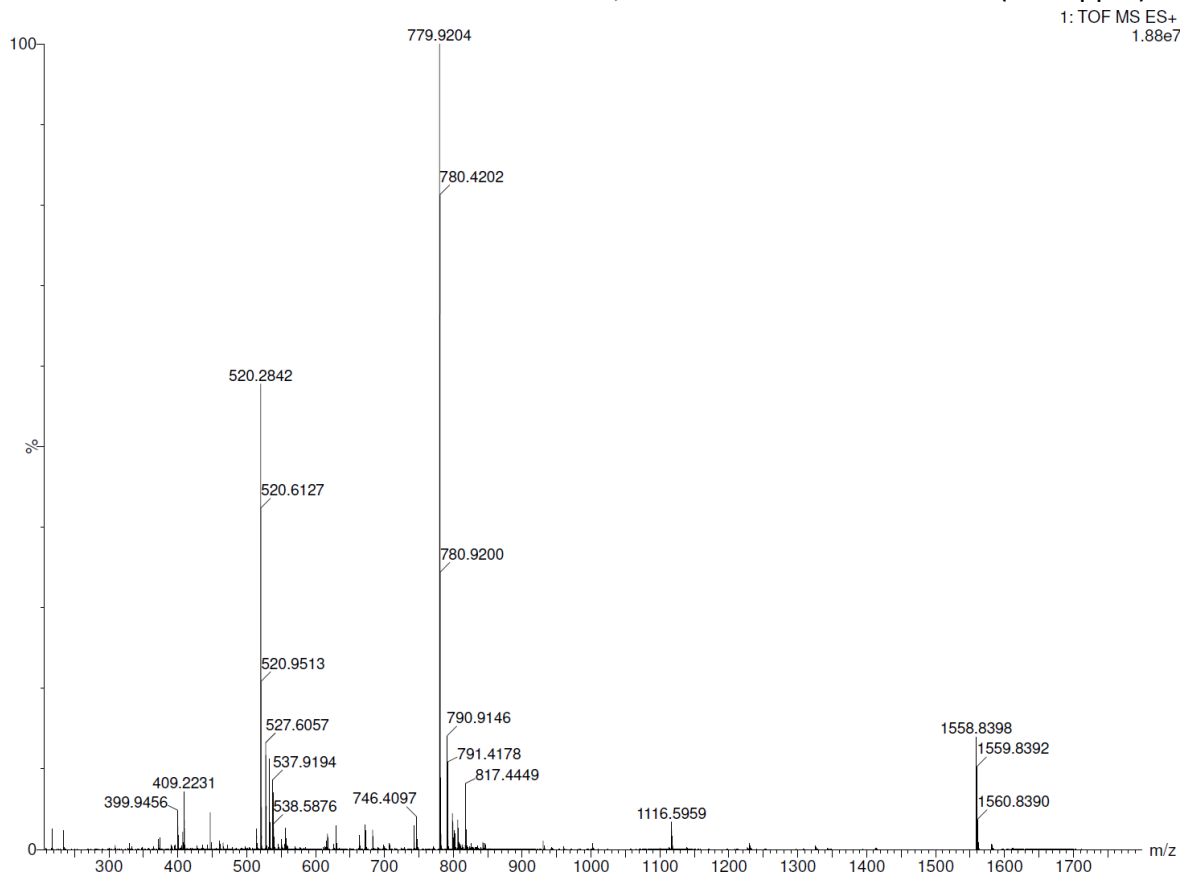

### E MS/MS of SELIDAIAEKacGGVSK peptide

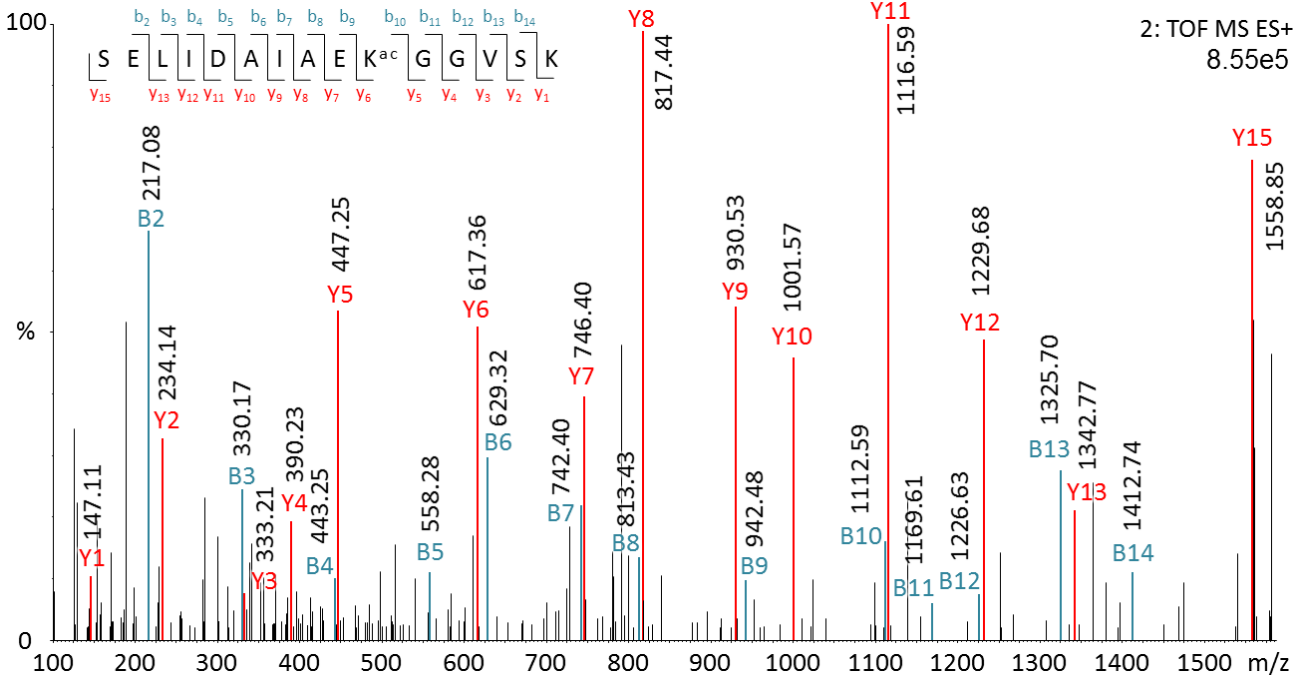

### F HU with N-terminal His tag and TEV cleavage site

- Before TEV cleavage: MKHHHHHPMSDYDIPTTENLYFQGMNKSSELIDAIAEKGGVSKTDAGKALD  
ATIASITEALKKGDVTLVGFGTFSVKERAARTGRNPKTGEELQIKATKVPSPFKAGKGLKDSVA (calculated  
MW = 12448.13)

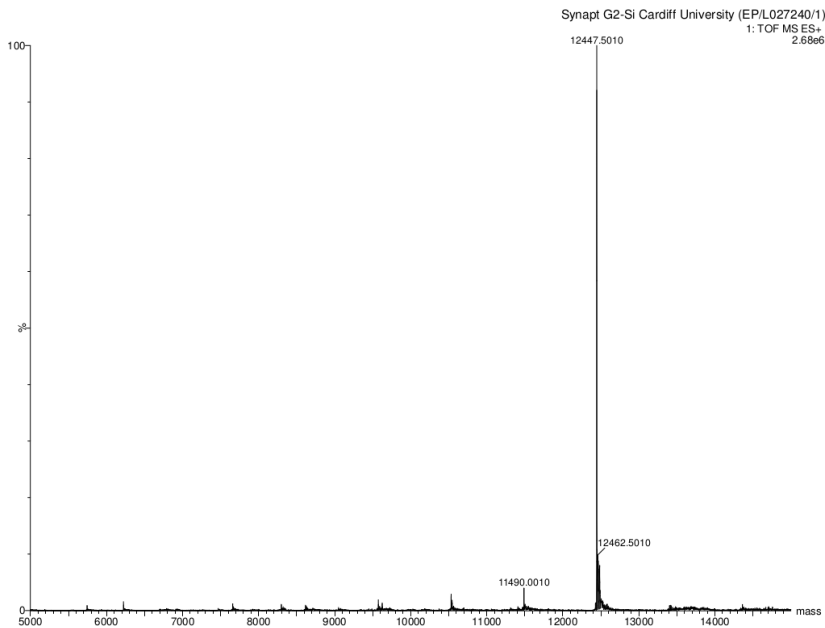

- After TEV cleavage **G**AMNKSELIDAI**A**EA**K**GGVSKTDAGKALD**A**TIASITEAL**K**KGDTVTLVGF**G**TF**S**VKER  
AARTGRNP**K**T**G**EELQ**I**KAT**K**V**P**S**F**KAG**K**GL**K**DS**V**A (calculated MW = 9449.83)

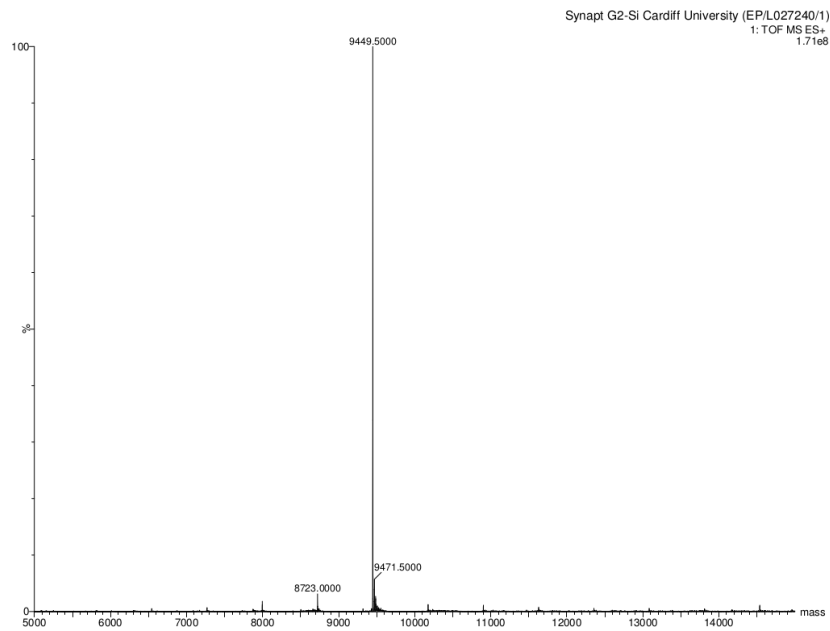

**Figure S4.** Amino acid sequence and mass spectrum of HU constructs. *A*, HU with C-terminal His tag. *B*, HU(K13ac) with C-terminal His tag. *C*, LC chromatogram of peptides from tryptic digestion of HU and HU(K13ac). *D*, HR-MS of SELIDAI**A**EA**K**GGVSK peptide. *E*, MS/MS of SELIDAI**A**EA**K**GGVSK peptide. *F*, HU with N-terminal His tag and TEV cleavage site. Amino acid sequence corresponds to HU, His-tag and TEV cleavage site is in **blue**, **green** and **red**, respectively. Acetylation site is underlined.

**A** Standard, run 1

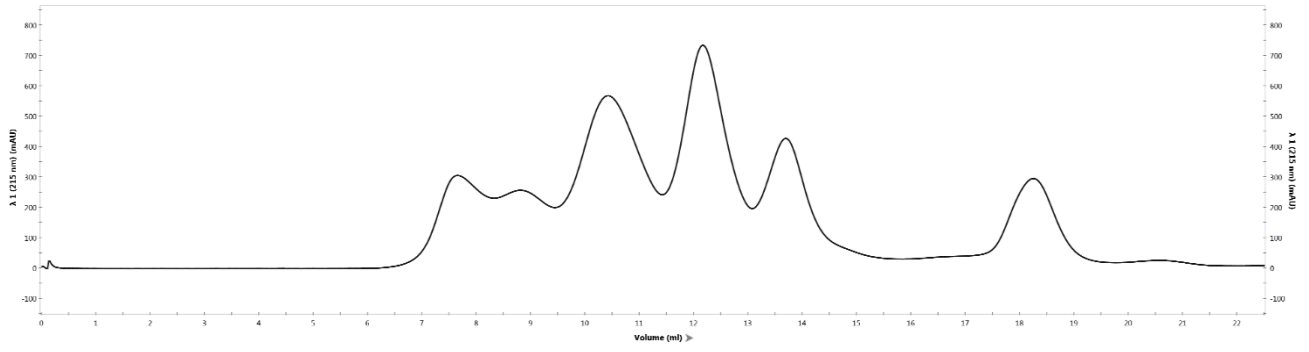

**B** Standard, run 2

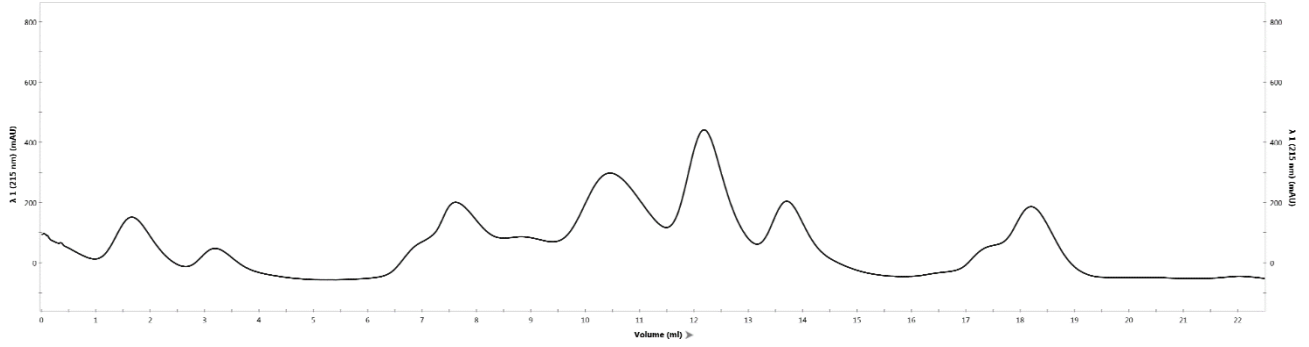

**C** HU, run 1

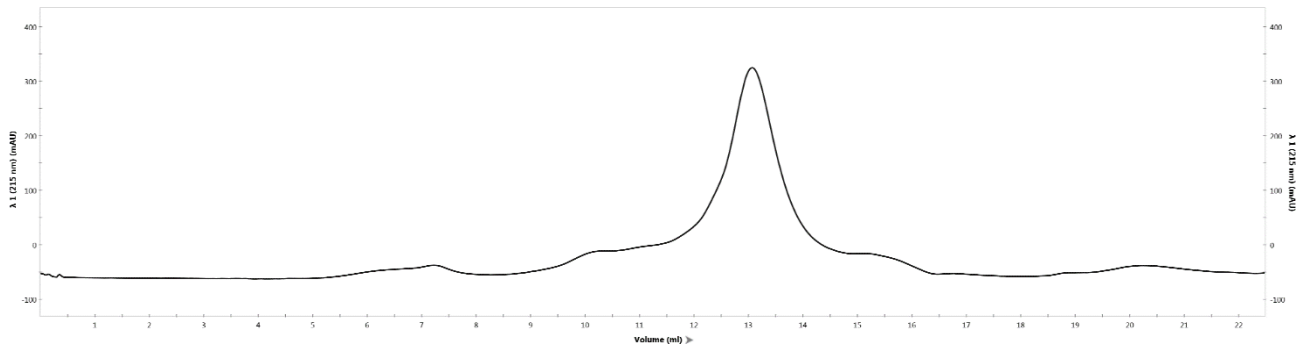

**D** HU, run 2

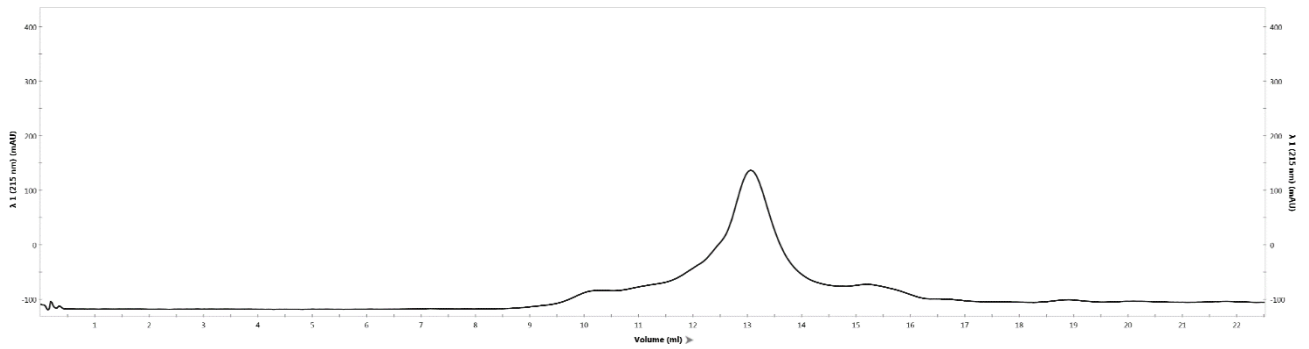



**E** HU(K13Ac), run 1

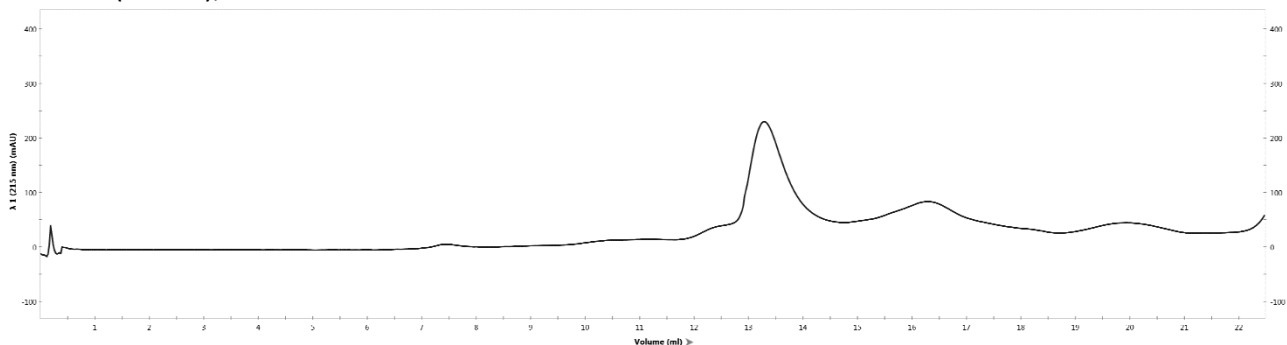

**F** HU(K13Ac), run 2

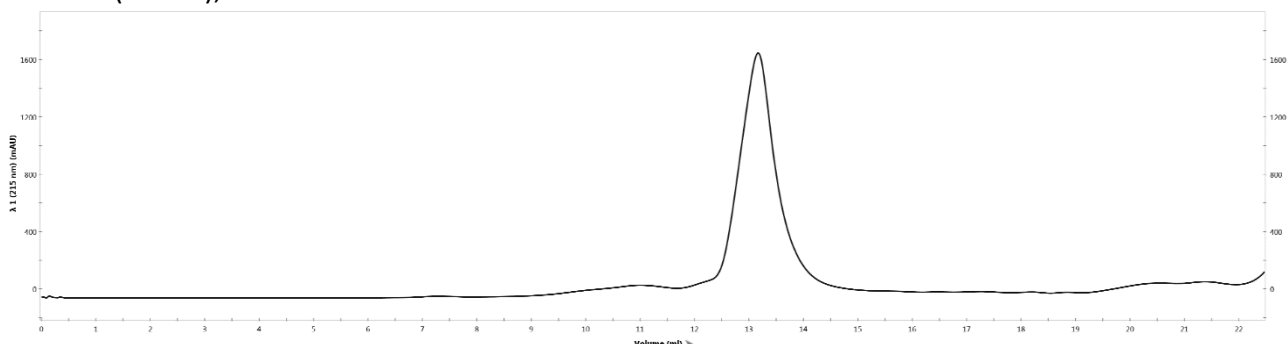

**G** Calibration curve

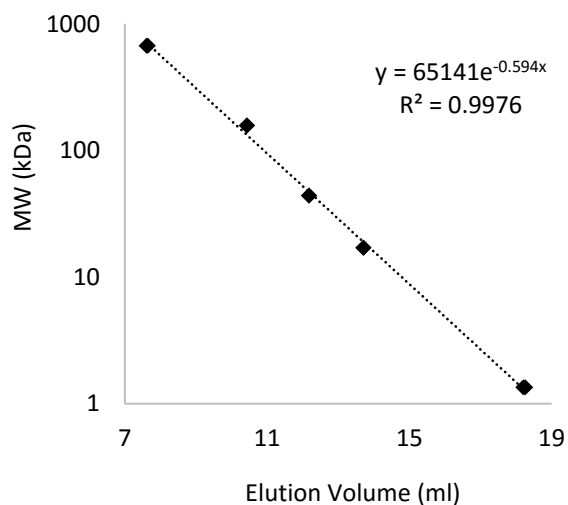

**H**

| Protein   | Elution Vol. (ml) | Estimated MW (kDa) | Theoretical MW (kDa) |
|-----------|-------------------|--------------------|----------------------|
| HU        | 13.06 ± 0.01      | 27.8               | 10.4                 |
|           | 13.23 ± 0.06      | 25.2               | 10.4                 |
| BSA       | 11.53             | 69.1               | 66.5                 |
| DHFR      | 13.21             | 25.5               | 18.0                 |
| Myoglobin | 13.86             | 17.3               | 17.0                 |

**Figure S5.** Size exclusion chromatography indicated the existence of HU and HU(K13Ac) as homodimers. Duplicate runs of standard (A, B) wild-type HU (C, D) and acetylated HU (E, F) are shown. Calibration curve (G) was calculated from the two standard runs. MW of proteins was calculated using the calibration curve (H). Standard proteins (BSA, DHFR and myoglobin) were analyzed under the same condition (spectra not shown) to validate the reliability of calibration curve.

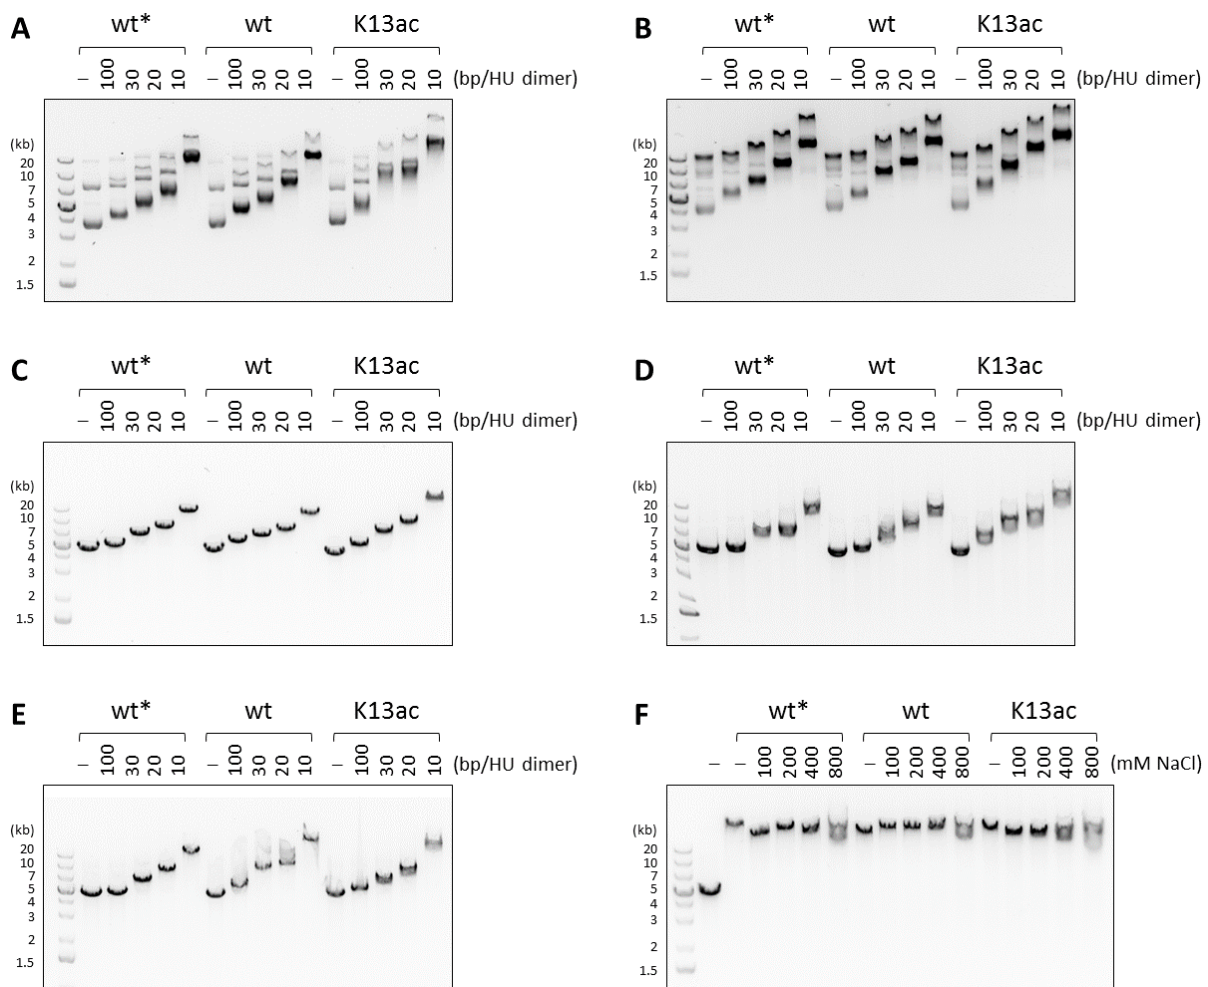

**Figure S6.** Electrophoretic mobility shift assay. DNA (250 ng) was incubated with the indicated amount of proteins in binding buffer at 37°C for 1 h before electrophoresed on a 1% agarose gel. Asterisk (\*) denotes protein without His-tag. (A – C) Binding buffer: 30 mM Tris pH 7.5, 100 mM NaCl, 0.02% v/v Tween20, 0.5 mg/ml BSA. (A) DNA: pBK AckRS. (B) DNA: pCX GFP. (C – F) DNA: BcuI-treated linearized pCX GFP. (D) Binding buffer: 10 mM HEPES, pH 7.5, 4 mM MgCl<sub>2</sub>. (E) Binding buffer: PBS pH 7.5. (F) Binding buffer: 30 mM Tris pH 7.5 with the indicated amount of NaCl.

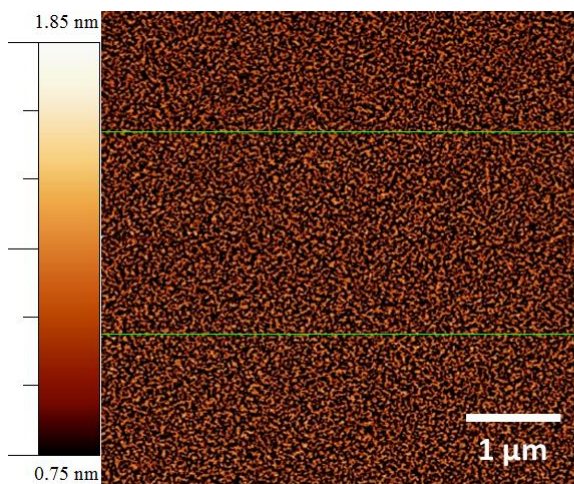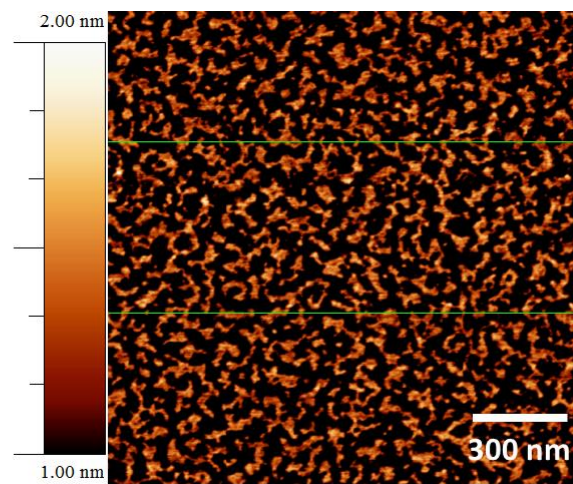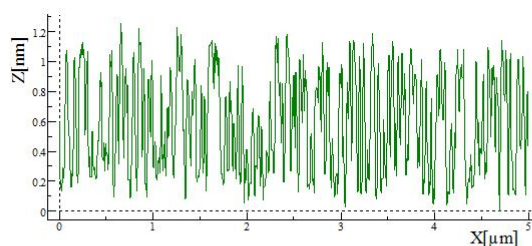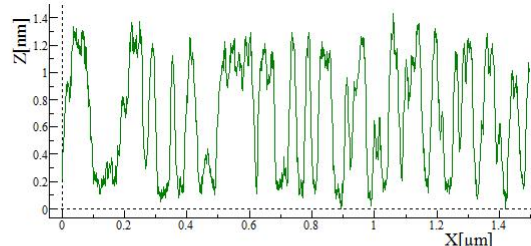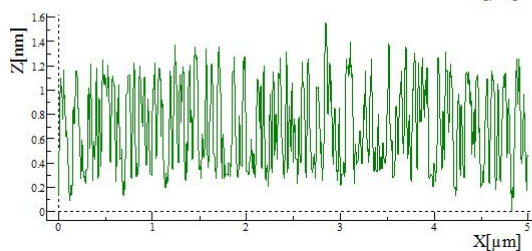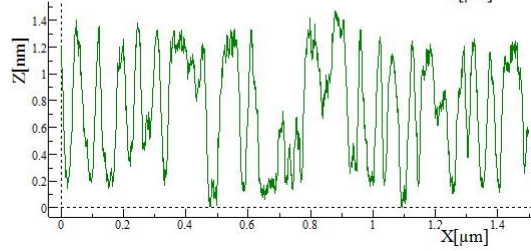

**Figure S7.** Atomic force microscopy images of wild-type HU protein with a C-terminal His tag without pre-incubation. HU protein (3  $\mu\text{M}$ ) in the buffer solution (10 mM HEPES, pH 7.5, 4 mM  $\text{MgCl}_2$ ) without incubation at 37°C was deposited onto freshly cleaved mica by spin coating.

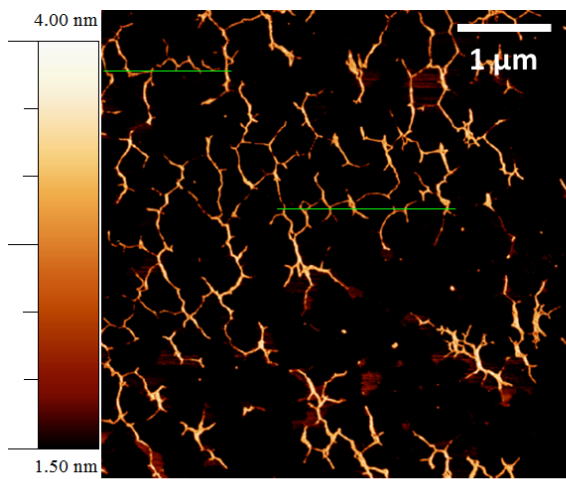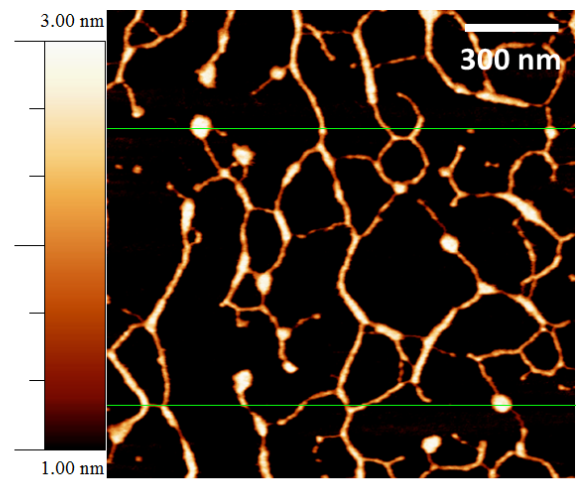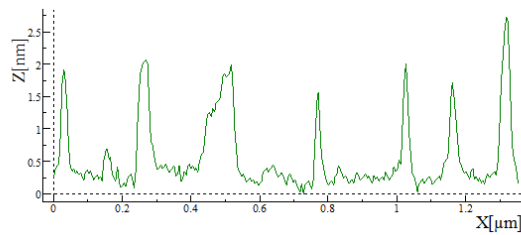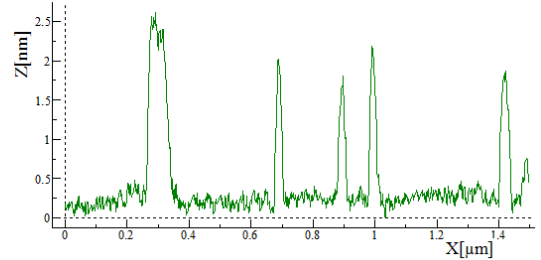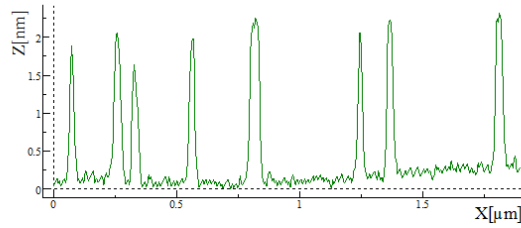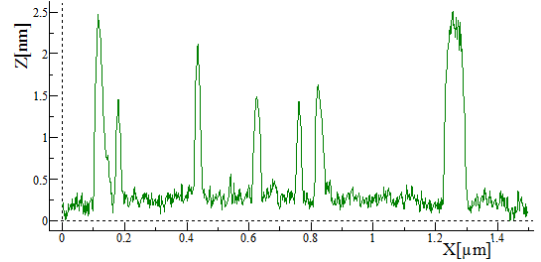

**Figure S8.** Atomic force microscopy images of DNA without pre-incubation. Linear DNA (BcuI-treated pCX eGFP at 10 ng/μl) in the buffer solution without incubation at 37°C was deposited onto freshly cleaved mica by spin coating.



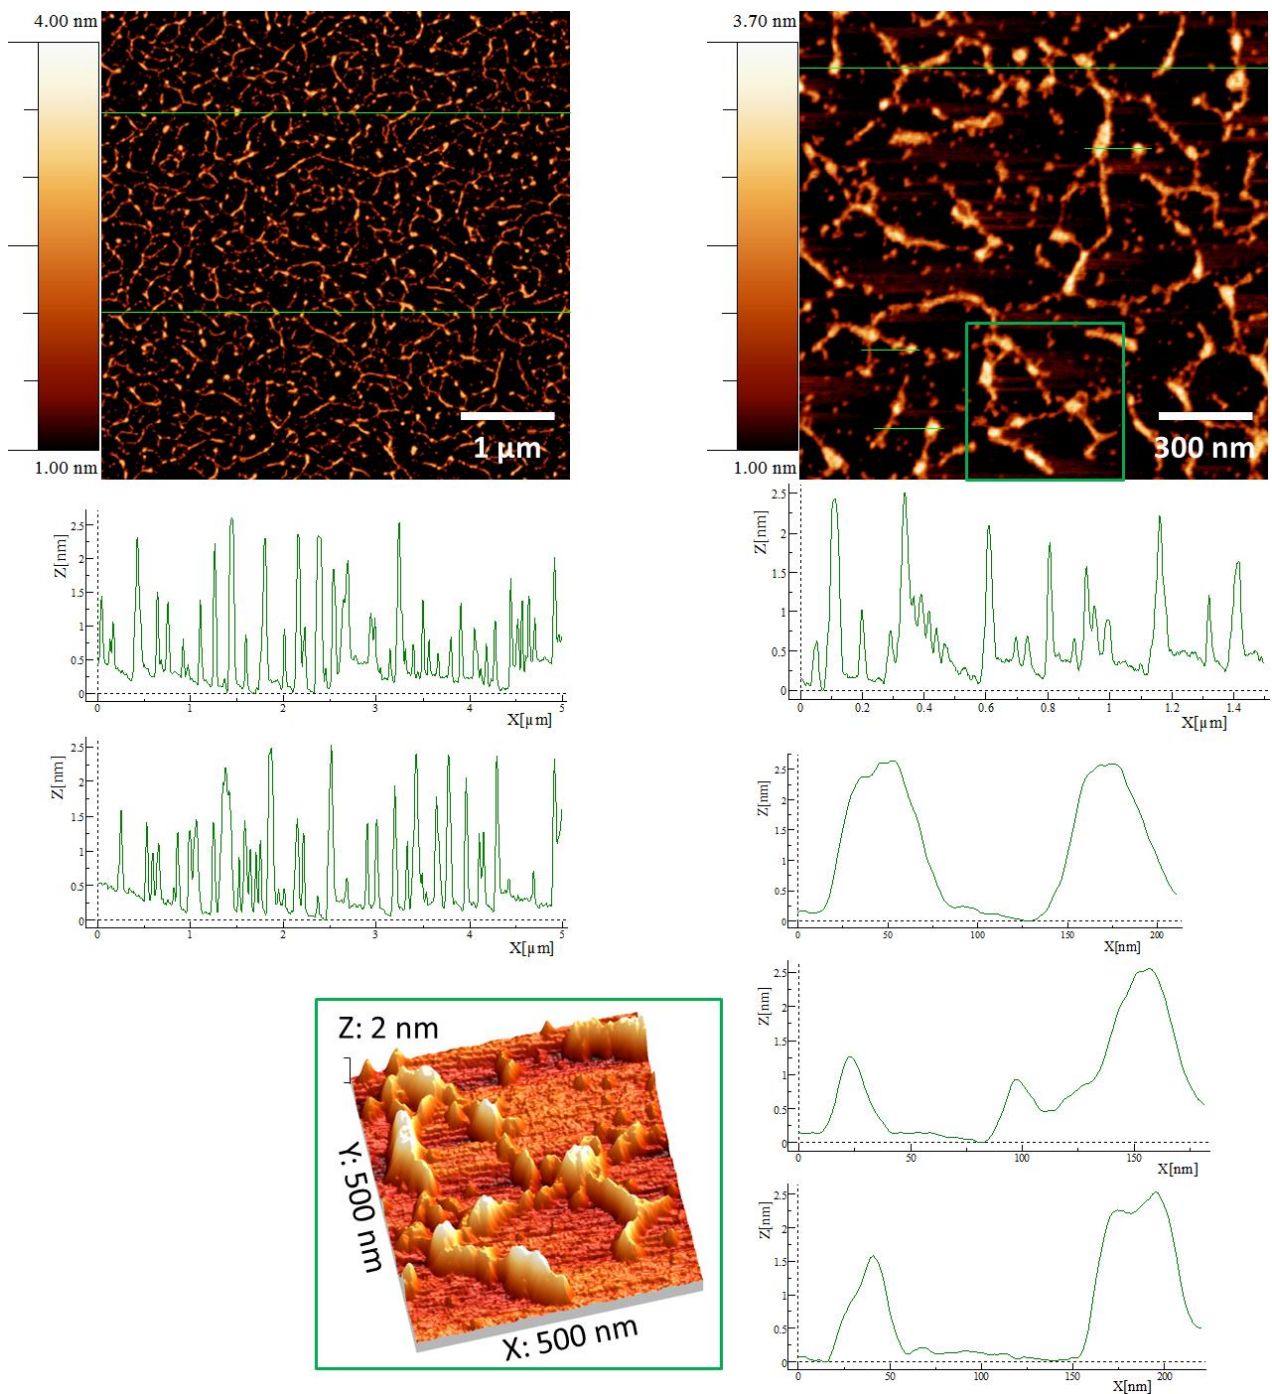

**Figure S9.** Atomic force microscopy images of DNA and wild-type HU protein without a C-terminal His tag without pre-incubation. Linear DNA (BcuI-treated pCX eGFP at 10 ng/ $\mu$ l) and HU protein (3  $\mu$ M) in the buffer solution without incubation at 37°C was deposited onto freshly cleaved mica by spin coating. This protein: DNA ratio equals to the presence of 1 HU homodimer for every 10 bp DNA, if all proteins bind.

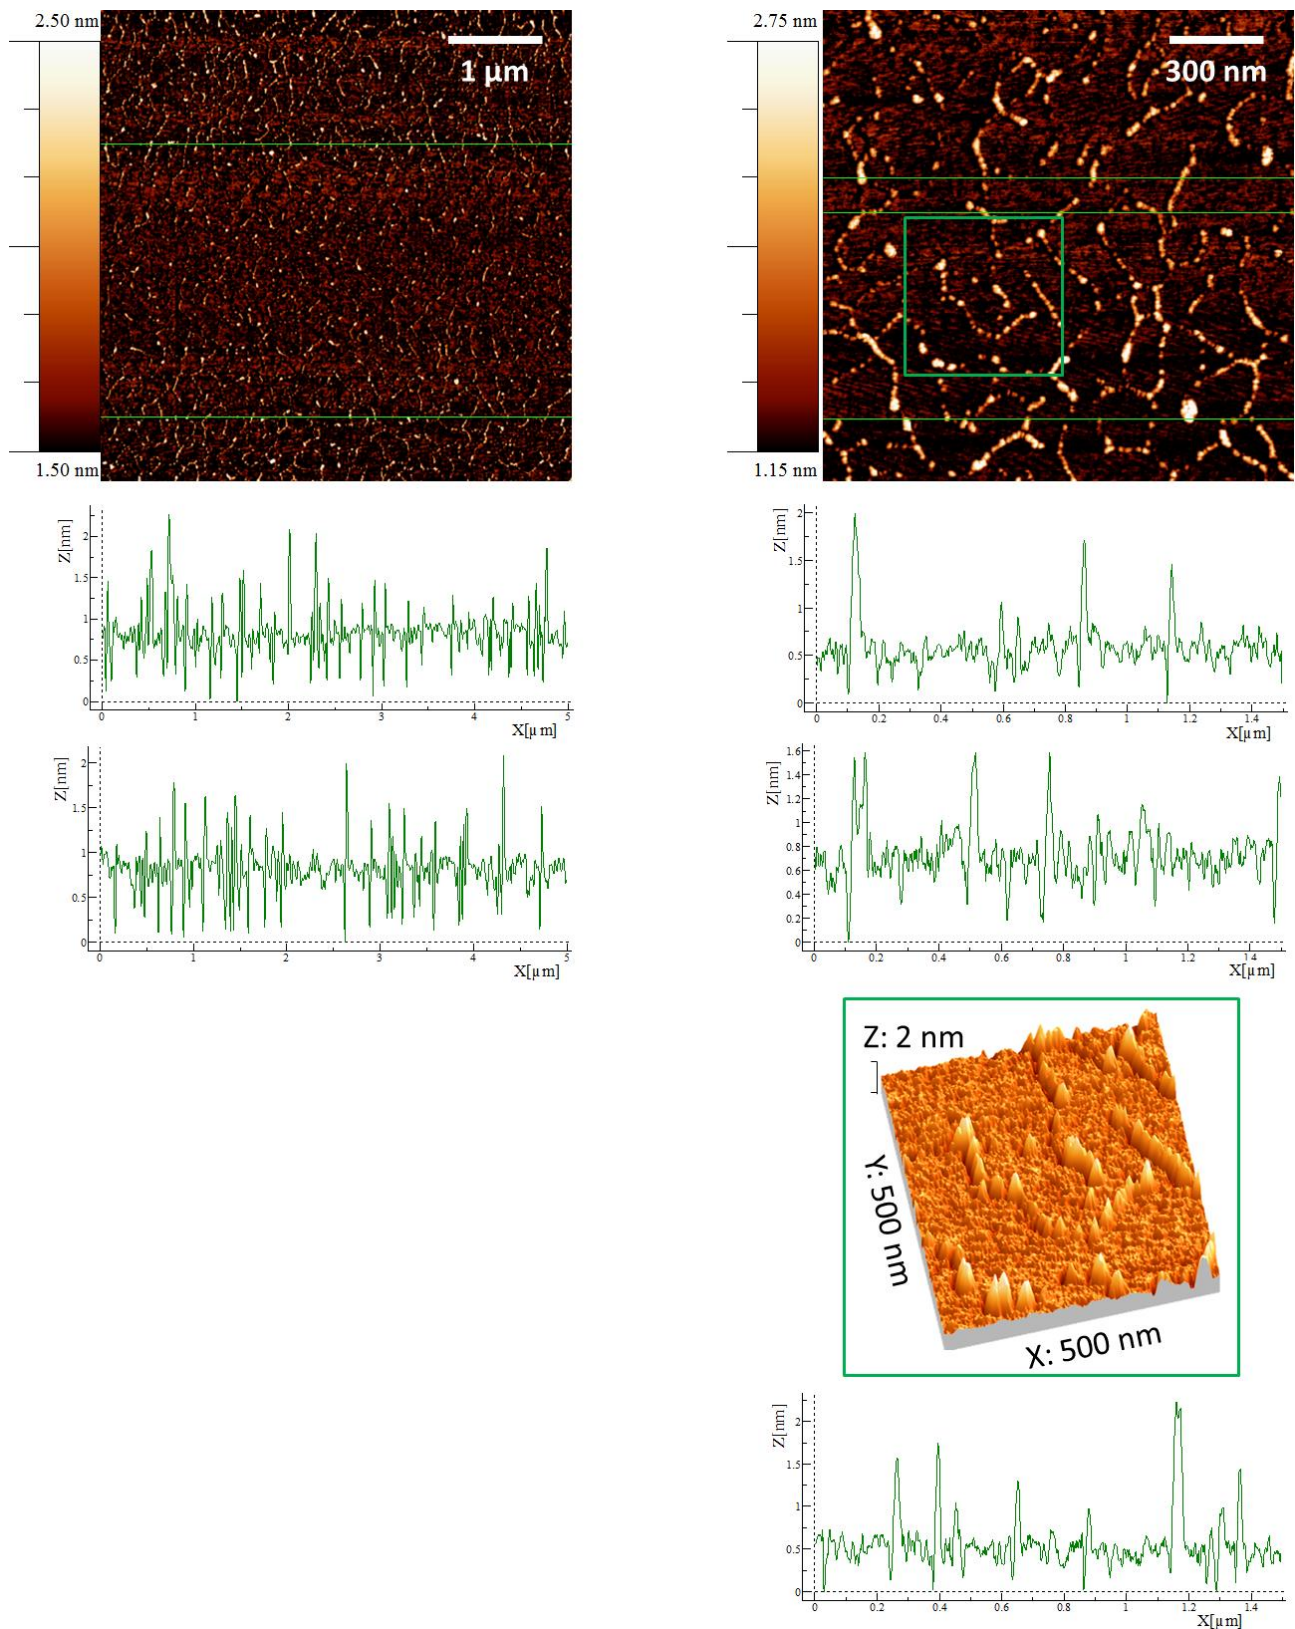

**Figure S10.** Atomic force microscopy images of DNA and wild-type HU protein with a C-terminal His tag without pre-incubation. Linear DNA (BcuI-treated pCX eGFP at 10 ng/ $\mu$ l) and HU protein (3  $\mu$ M) in the buffer solution without incubation at 37°C was deposited onto freshly cleaved mica by spin coating. This protein: DNA ratio equals to the presence of 1 HU homodimer for every 10 bp DNA, if all proteins bind.



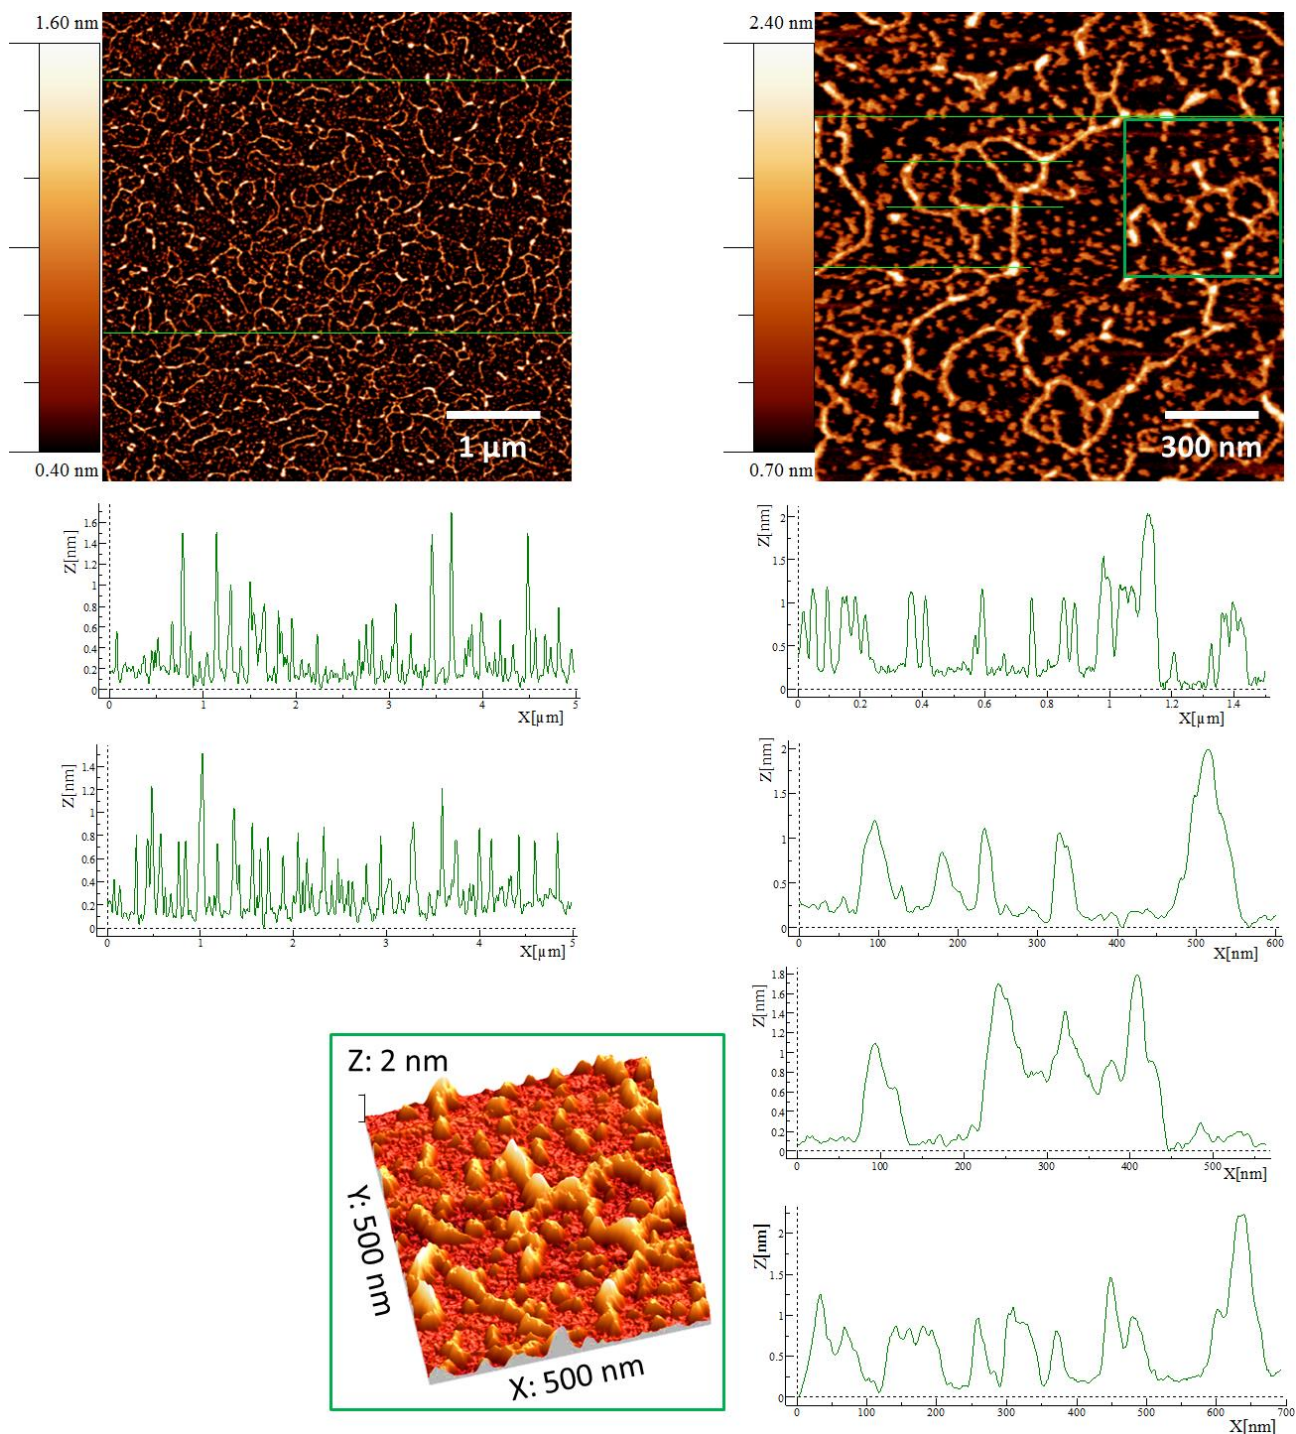

**Figure S11.** Atomic force microscopy images of DNA and K13ac HU protein with a C-terminal His tag without pre-incubation. Linear DNA (BcuI-treated pCX eGFP at 10 ng/ $\mu$ l) and HU protein (3  $\mu$ M) in the buffer solution without incubation at 37°C was deposited onto freshly cleaved mica by spin coating. This protein: DNA ratio equals to the presence of 1 HU homodimer for every 10 bp DNA, if all proteins bind.

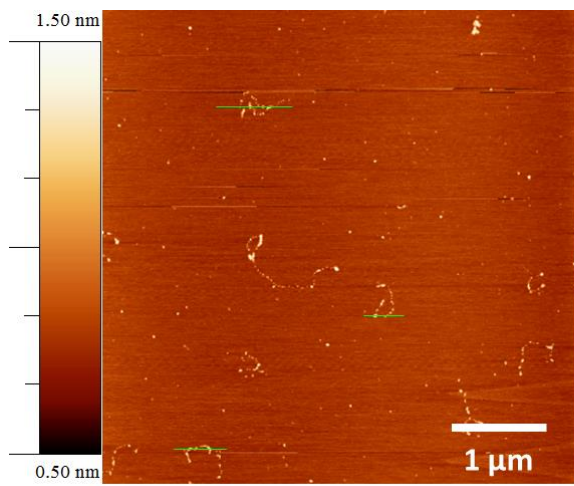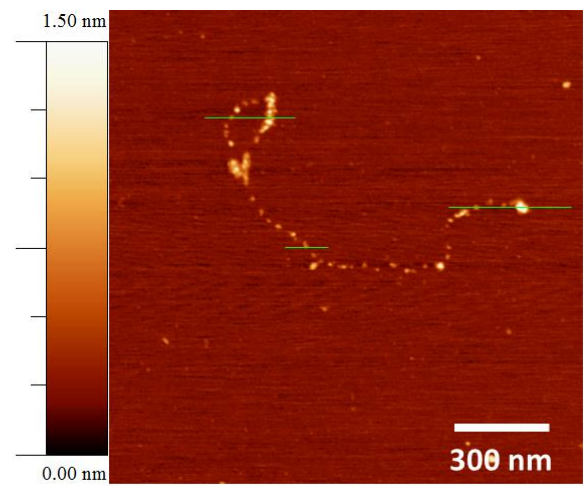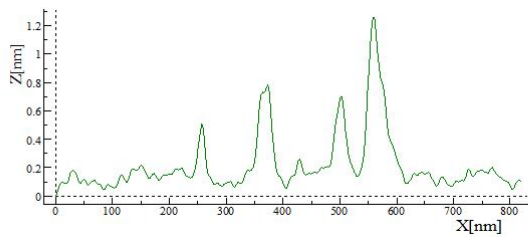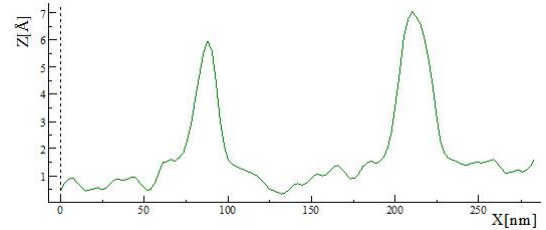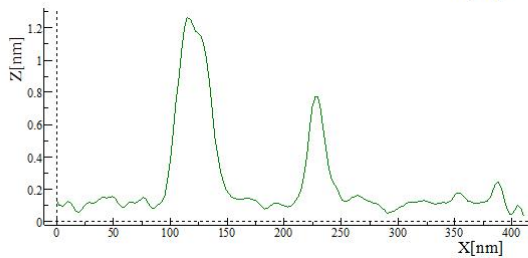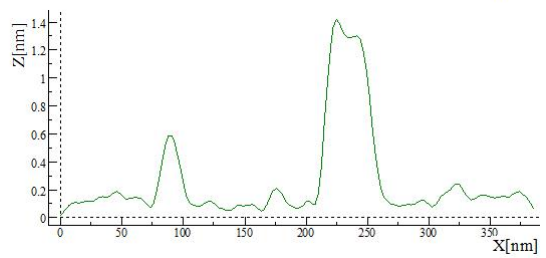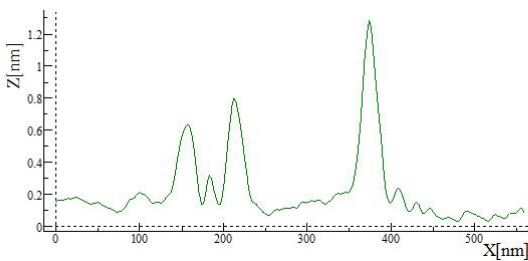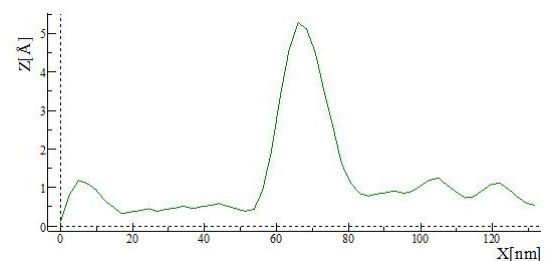

**Figure S12.** Atomic force microscopy images of DNA after incubation. Linear DNA (BcuI-treated pCX eGFP at 10 ng/ $\mu$ l) in the buffer solution was incubated at 37°C for 1 h before being deposited onto freshly cleaved mica by spin coating.



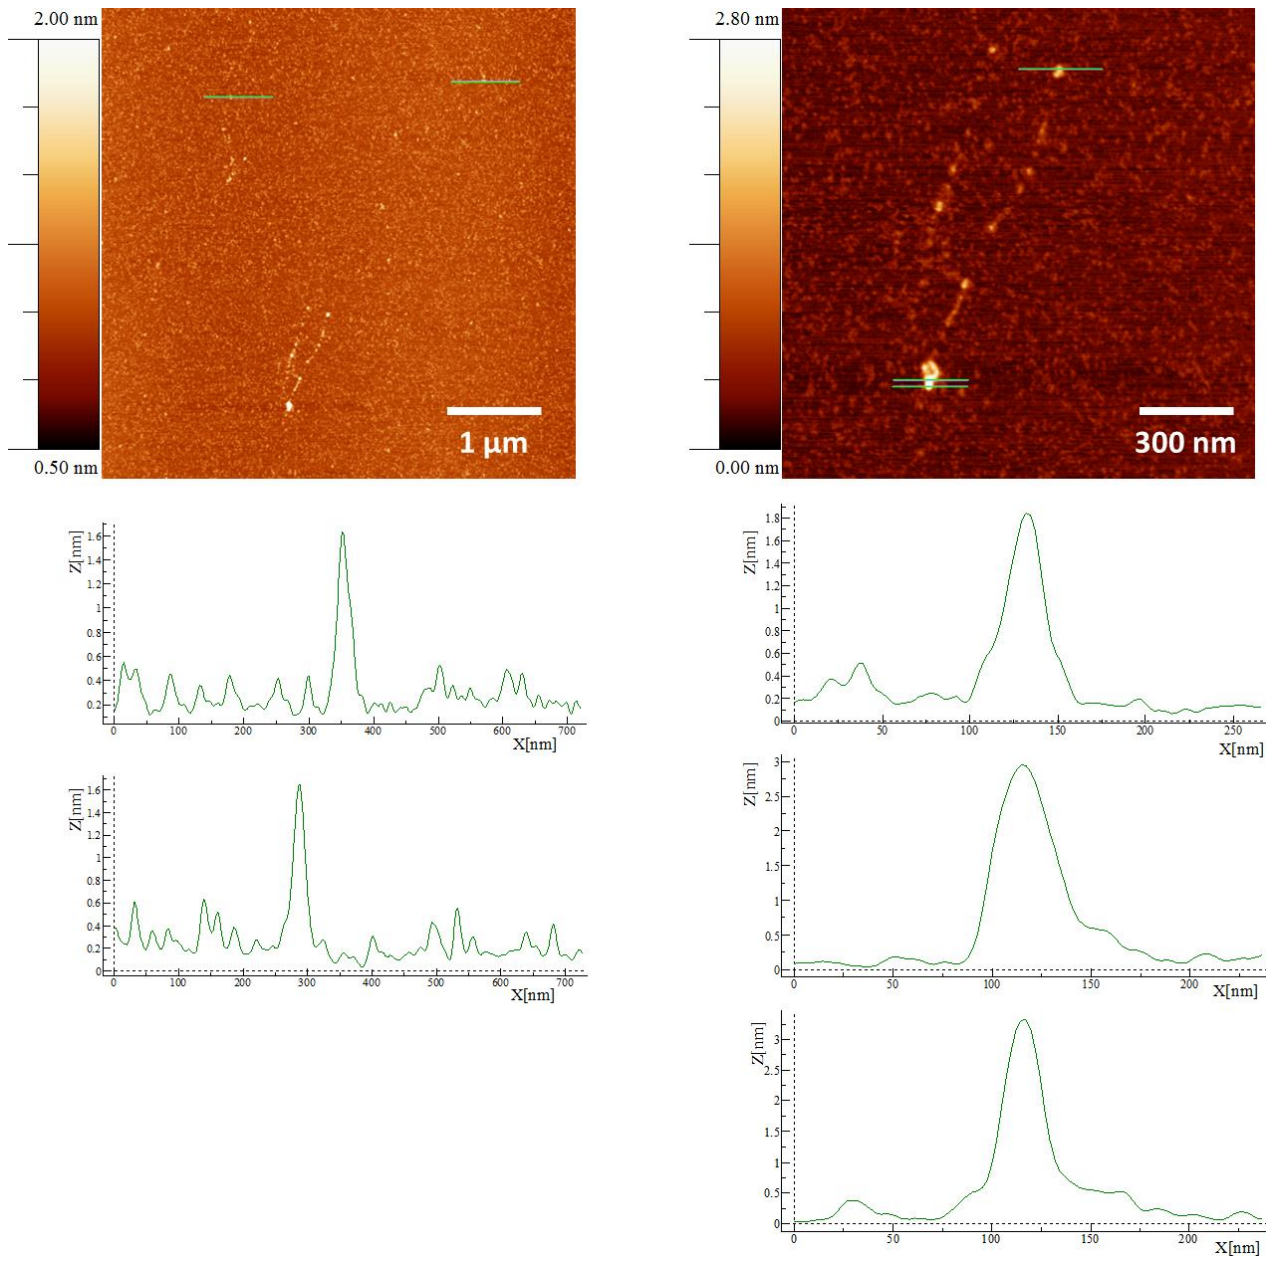

**Figure S13.** Atomic force microscopy images of DNA and wild-type HU protein without a C-terminal His tag after incubation. Linear DNA (BcuI-treated pCX eGFP at 10 ng/ $\mu$ l) and HU protein (3  $\mu$ M) in the buffer solution were incubated at 37°C for 1 h before being deposited onto freshly cleaved mica by spin coating. This protein: DNA ratio equals to the presence of 1 HU homodimer for every 10 bp DNA, if all proteins bind.

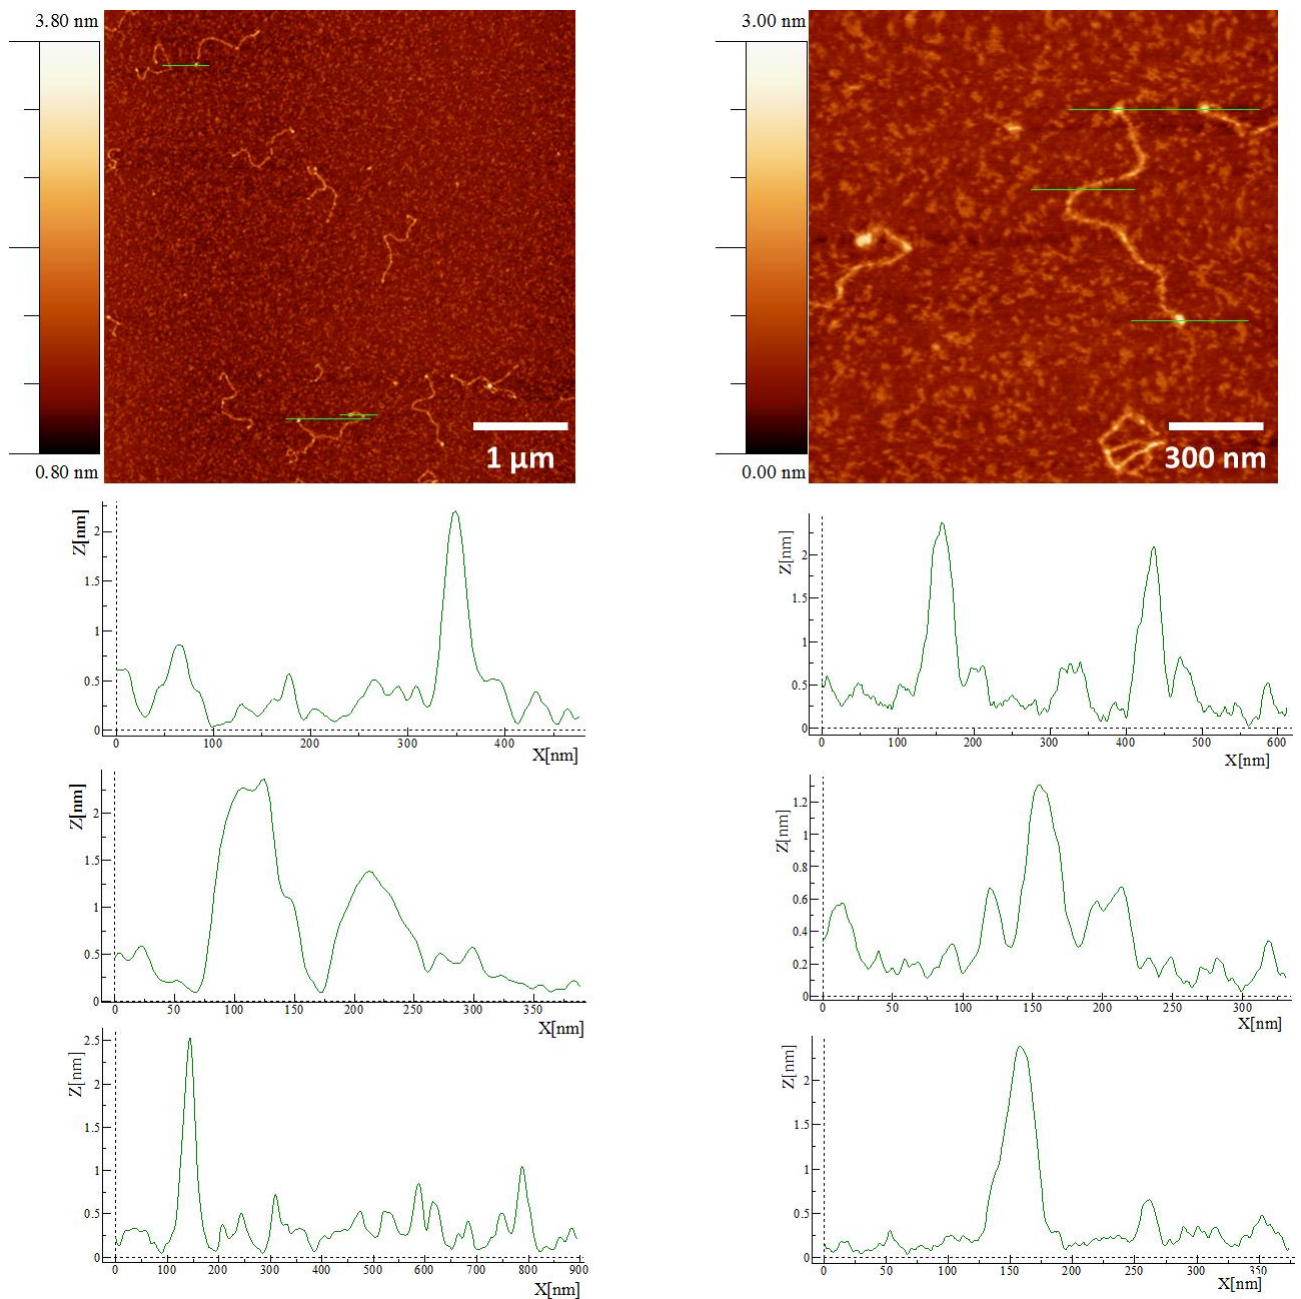

**Figure S14.** Atomic force microscopy images of DNA and wild-type HU protein with a C-terminal His tag after incubation. Linear DNA (BcuI-treated pCX eGFP at 10 ng/ $\mu$ l) and HU protein (3  $\mu$ M) in the buffer solution were incubated at 37°C for 1 h before being deposited onto freshly cleaved mica by spin coating. This protein: DNA ratio equals to the presence of 1 HU homodimer for every 10 bp DNA, if all proteins bind.

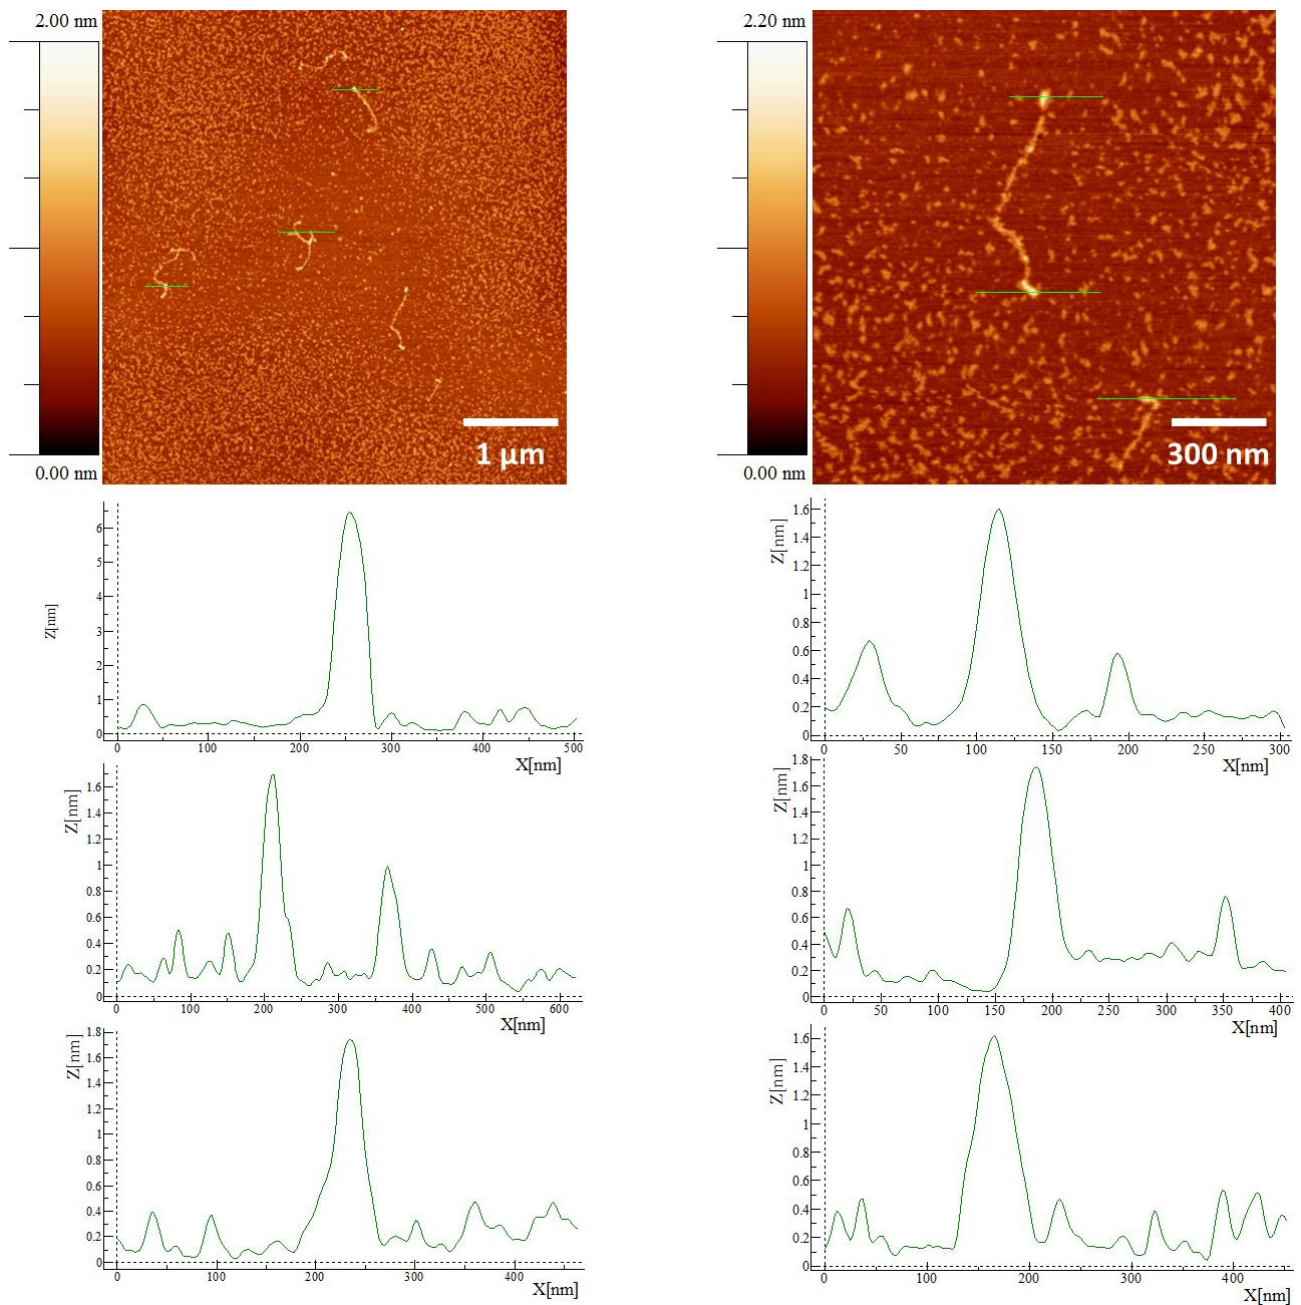

**Figure S15.** Atomic force microscopy images of DNA and K13ac HU protein with a C-terminal His tag after incubation. Linear DNA (BcuI-treated pCX eGFP at 10 ng/ $\mu$ l) and HU protein (3  $\mu$ M) in the buffer solution were incubated at 37°C for 1 h before being deposited onto freshly cleaved mica by spin coating. This protein: DNA ratio equals to the presence of 1 HU homodimer for every 10 bp DNA, if all proteins bind.



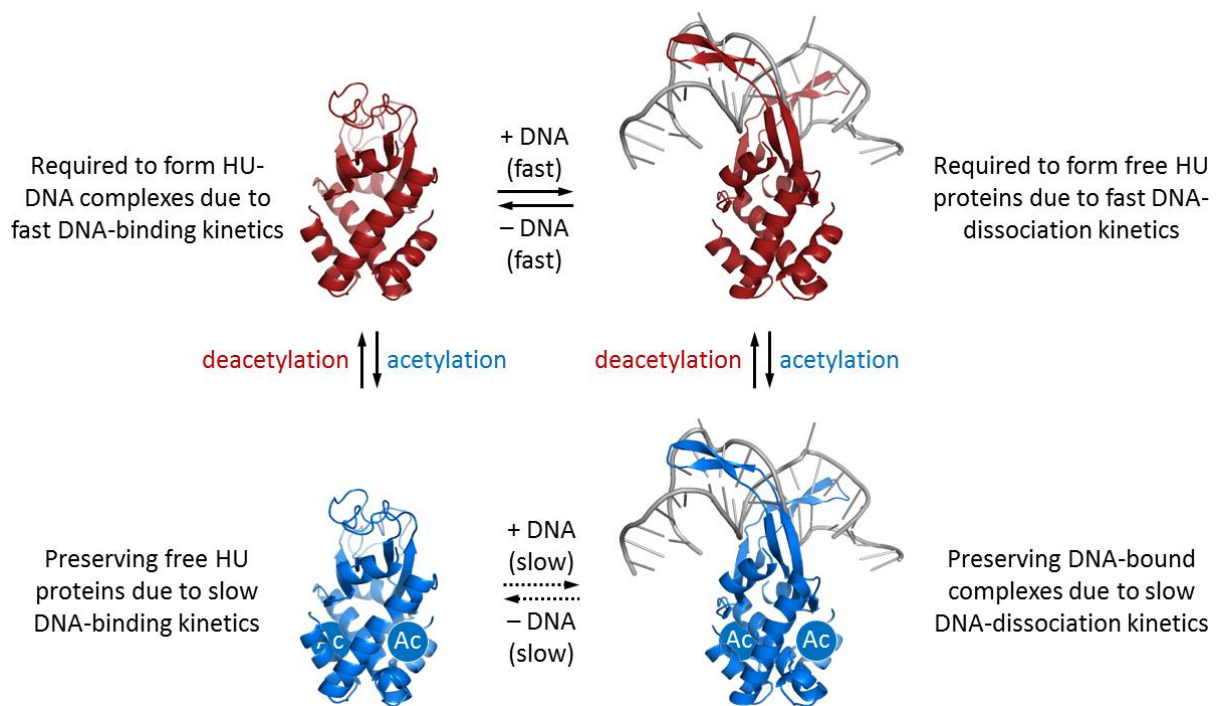

**Figure S16.** Model of Lys13 acetylation in regulating DNA binding of HU proteins. The fast DNA-association kinetics of the unmodified HU protein indicates that this species is required to form HU-DNA complexes. If DNA needs to dissociate from the complexes, HU proteins in the complexes have also in the non-acetylated state because acetylation significantly decreases the DNA dissociation kinetics. On the other hand, acetylation of free HU proteins will preserve the pool of free HU protein due to the slow DNA-binding kinetics of acetylated HU. Similarly, due to the slow DNA-dissociation kinetics, acetylated HU-DNA complexes would remain in the DNA-bound state and preserve HU-DNA complexes.

## References

1. Kentache, T., Jouenne, T., De, E. and Hardouin, J. (2016) Proteomic characterization of N-alpha- and N-epsilon-acetylation in *Acinetobacter baumannii*. *J. Proteomics*, **144**, 148-158.
2. Kosono, S., Tamura, M., Suzuki, S., Kawamura, Y., Yoshida, A., Nishiyama, M. and Yoshida, M. (2015) Changes in the Acetylome and Succinylome of *Bacillus subtilis* in Response to Carbon Source. *Plos One*, **10**, e0131169.
3. Zhang, K., Zheng, S.Z., Yang, J.S., Chen, Y. and Cheng, Z.Y. (2013) Comprehensive Profiling of Protein Lysine Acetylation in *Escherichia coli*. *J. Proteome Res.*, **12**, 844-851.
4. Castano-Cerezo, S., Bernal, V., Post, H., Fuhrer, T., Cappadona, S., Sanchez-Diaz, N.C., Sauer, U., Heck, A.J.R., Altelaar, A.M.F. and Canovas, M. (2014) Protein acetylation affects acetate metabolism, motility and acid stress response in *Escherichia coli*. *Mol. Syst. Biol.*, **10**, 762.
5. Lee, D.W., Kim, D., Lee, Y.J., Kim, J.A., Choi, J.Y., Kang, S. and Pan, J.G. (2013) Proteomic analysis of acetylation in thermophilic *Geobacillus kaustophilus*. *Proteomics*, **13**, 2278-2282.
6. Ghosh, S., Padmanabhan, B., Anand, C. and Nagaraja, V. (2016) Lysine acetylation of the *Mycobacterium tuberculosis* HU protein modulates its DNA binding and genome organization. *Mol. Microbiol.*, **100**, 577-588.
7. Xie, L., Wang, X., Zeng, J., Zhou, M., Duan, X., Li, Q., Zhang, Z., Luo, H., Pang, L., Li, W. *et al.* (2015) Proteome-wide lysine acetylation profiling of the human pathogen *Mycobacterium tuberculosis*. *Int. J. Biochem. Cell Biol.*, **59**, 193-202.
8. Ouidir, T., Cosette, P., Jouenne, T. and Hardouin, J. (2015) Proteomic profiling of lysine acetylation in *Pseudomonas aeruginosa* reveals the diversity of acetylated proteins. *Proteomics*, **15**, 2152-2157.
9. Okanishi, H., Kim, K., Masui, R. and Kuramitsu, S. (2013) Acetylome with structural mapping reveals the significance of lysine acetylation in *Thermus thermophilus*. *J. Proteome Res.*, **12**, 3952-3968.
10. Pan, J.Y., Ye, Z.C., Cheng, Z.Y., Peng, X.J., Wen, L.Y. and Zhao, F.K. (2014) Systematic Analysis of the Lysine Acetylome in *Vibrio parahemolyticus*. *J. Proteome Res.*, **13**, 3294-3302.

peg.1002 29134

| #1 | b <sup>+</sup> | b <sup>2+</sup> | b <sup>3+</sup> | Seq.        | y <sup>+</sup> | y <sup>2+</sup> | y <sup>3+</sup> | #2 |
|----|----------------|-----------------|-----------------|-------------|----------------|-----------------|-----------------|----|
| 1  | 114.09135      | 57.54931        | 38.70197        | L           |                |                 |                 | 24 |
| 2  | 201.12338      | 101.06533       | 67.71264        | S           | 2777.39276     | 1389.20002      | 926.46910       | 23 |
| 3  | 300.19180      | 150.59954       | 100.73545       | V           | 2690.36073     | 1345.68400      | 897.45843       | 22 |
| 4  | 463.25512      | 232.13120       | 155.08989       | Y           | 2591.29231     | 1296.14979      | 864.43562       | 21 |
| 5  | 550.28715      | 275.64721       | 184.10057       | S           | 2428.22899     | 1214.61813      | 810.08118       | 20 |
| 6  | 679.32975      | 340.16851       | 227.11477       | E           | 2341.19696     | 1171.10212      | 781.07050       | 19 |
| 7  | 842.39307      | 421.70017       | 281.46921       | Y           | 2212.15436     | 1106.58082      | 738.05630       | 18 |
| 8  | 989.42848      | 495.21788       | 330.48101       | M-Oxidation | 2049.09104     | 1025.04916      | 683.70186       | 17 |
| 9  | 1117.48706     | 559.24717       | 373.16720       | Q           | 1902.05563     | 951.53145       | 634.69006       | 16 |
| 10 | 1218.53474     | 609.77101       | 406.84976       | T           | 1773.99705     | 887.50216       | 592.00387       | 15 |
| 11 | 1331.61881     | 666.31304       | 444.54445       | L           | 1672.94937     | 836.97832       | 558.32131       | 14 |
| 12 | 1444.70288     | 722.85508       | 482.23914       | L           | 1559.86530     | 780.43629       | 520.62662       | 13 |
| 13 | 1572.76146     | 786.88437       | 524.92534       | Q           | 1446.78123     | 723.89425       | 482.93193       | 12 |
| 14 | 1659.79349     | 830.40038       | 553.93601       | S           | 1318.72265     | 659.86496       | 440.24573       | 11 |
| 15 | 1787.85207     | 894.42967       | 596.62221       | Q           | 1231.69062     | 616.34895       | 411.23506       | 10 |
| 16 | 1924.91098     | 962.95913       | 642.30851       | H           | 1103.63204     | 552.31966       | 368.54886       | 9  |
| 17 | 2011.94301     | 1006.47514      | 671.31919       | S           | 966.57313      | 483.79020       | 322.86256       | 8  |
| 18 | 2125.02708     | 1063.01718      | 709.01388       | L           | 879.54110      | 440.27419       | 293.85188       | 7  |
| 19 | 2262.08599     | 1131.54663      | 754.70018       | H           | 766.45703      | 383.73215       | 256.15719       | 6  |
| 20 | 2390.18096     | 1195.59412      | 797.39850       | K           | 629.39812      | 315.20270       | 210.47089       | 5  |
| 21 | 2560.28650     | 1280.64689      | 854.10035       | K-Acetyl    | 501.30315      | 251.15521       | 167.77257       | 4  |
| 22 | 2688.34508     | 1344.67618      | 896.78654       | Q           | 331.19761      | 166.10244       | 111.07072       | 3  |
| 23 | 2801.42915     | 1401.21821      | 934.48123       | I           | 203.13903      | 102.07315       | 68.38453        | 2  |
| 24 |                |                 |                 | A           | 90.05496       | 45.53112        | 30.68984        | 1  |

Extracted from: Z:\712AB\SK17-S (Ac)\Chichi-Abaumannii-SK17-S-Acetyl\_DrWu\_20140703.raw #29134 RT: 80.85  
 ITMS, CID@35.00, z=+3, Mono m/z=964.16290 Da, MH+=2890.47416 Da, Match Tol.=0.6 Da

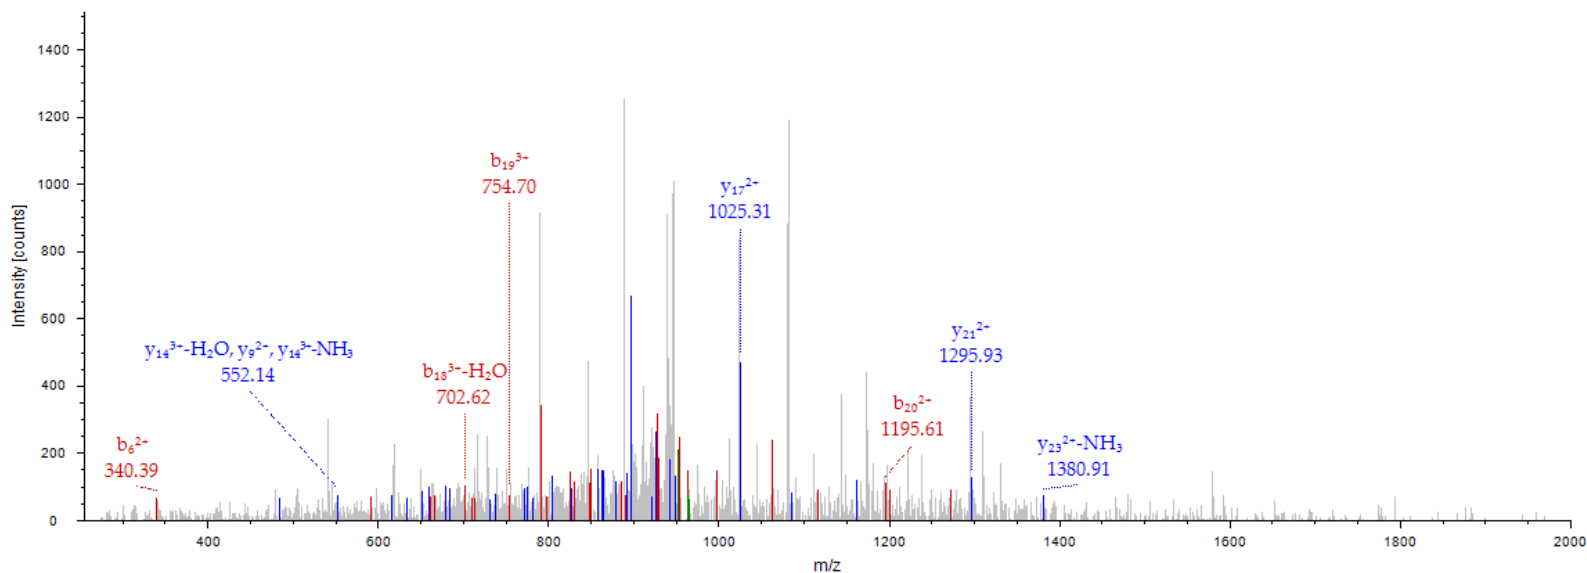

# peg.1003 19195

| #1 | b <sup>+</sup> | b <sup>2+</sup> | b <sup>3+</sup> | Seq.     | y <sup>+</sup> | y <sup>2+</sup> | y <sup>3+</sup> | #2 |
|----|----------------|-----------------|-----------------|----------|----------------|-----------------|-----------------|----|
| 1  | 129.10225      | 65.05476        | 43.70560        | K        |                |                 |                 | 30 |
| 2  | 292.16557      | 146.58642       | 98.06004        | Y        | 3178.55802     | 1589.78265      | 1060.19086      | 29 |
| 3  | 455.22889      | 228.11808       | 152.41448       | Y        | 3015.49470     | 1508.25099      | 1005.83642      | 28 |
| 4  | 556.27657      | 278.64192       | 186.09704       | T        | 2852.43138     | 1426.71933      | 951.48198       | 27 |
| 5  | 657.32425      | 329.16576       | 219.77960       | T        | 2751.38370     | 1376.19549      | 917.79942       | 26 |
| 6  | 714.34572      | 357.67650       | 238.78676       | G        | 2650.33602     | 1325.67165      | 884.11686       | 25 |
| 7  | 801.37775      | 401.19251       | 267.79743       | S        | 2593.31455     | 1297.16091      | 865.10970       | 24 |
| 8  | 914.46182      | 457.73455       | 305.49212       | L        | 2506.28252     | 1253.64490      | 836.09902       | 23 |
| 9  | 1077.52514     | 539.26621       | 359.84656       | Y        | 2393.19845     | 1197.10286      | 798.40433       | 22 |
| 10 | 1148.56226     | 574.78477       | 383.52560       | A        | 2230.13513     | 1115.57120      | 744.04989       | 21 |
| 11 | 1263.58921     | 632.29824       | 421.86792       | D        | 2159.09801     | 1080.05264      | 720.37085       | 20 |
| 12 | 1449.66853     | 725.33790       | 483.89436       | W        | 2044.07106     | 1022.53917      | 682.02854       | 19 |
| 13 | 1548.73695     | 774.87211       | 516.91717       | V        | 1857.99174     | 929.49951       | 620.00210       | 18 |
| 14 | 1663.76390     | 832.38559       | 555.25948       | D        | 1758.92332     | 879.96530       | 586.97929       | 17 |
| 15 | 1762.83232     | 881.91980       | 588.28229       | V        | 1643.89637     | 822.45182       | 548.63697       | 16 |
| 16 | 1819.85379     | 910.43053       | 607.28945       | G        | 1544.82795     | 772.91761       | 515.61417       | 15 |
| 17 | 1918.92221     | 959.96474       | 640.31225       | V        | 1487.80648     | 744.40688       | 496.60701       | 14 |
| 18 | 2019.96989     | 1010.48858      | 673.99481       | T        | 1388.73806     | 694.87267       | 463.58420       | 13 |
| 19 | 2134.99684     | 1068.00206      | 712.33713       | D        | 1287.69038     | 644.34883       | 429.90164       | 12 |
| 20 | 2248.08091     | 1124.54409      | 750.03182       | L        | 1172.66343     | 586.83535       | 391.55933       | 11 |
| 21 | 2418.18644     | 1209.59686      | 806.73366       | K-Acetyl | 1059.57936     | 530.29332       | 353.86464       | 10 |
| 22 | 2475.20791     | 1238.10759      | 825.74082       | G        | 889.47382      | 445.24055       | 297.16279       | 9  |
| 23 | 2604.25051     | 1302.62889      | 868.75502       | E        | 832.45235      | 416.72981       | 278.15563       | 8  |
| 24 | 2691.28254     | 1346.14491      | 897.76570       | S        | 703.40975      | 352.20851       | 235.14143       | 7  |
| 25 | 2748.30401     | 1374.65564      | 916.77285       | G        | 616.37772      | 308.69250       | 206.13076       | 6  |
| 26 | 2835.33604     | 1418.17166      | 945.78353       | S        | 559.35625      | 280.18176       | 187.12360       | 5  |
| 27 | 2934.40446     | 1467.70587      | 978.80634       | V        | 472.32422      | 236.66575       | 158.11292       | 4  |
| 28 | 3033.47288     | 1517.24008      | 1011.82914      | V        | 373.25580      | 187.13154       | 125.09012       | 3  |
| 29 | 3132.54130     | 1566.77429      | 1044.85195      | V        | 274.18738      | 137.59733       | 92.06731        | 2  |
| 30 |                |                 |                 | R        | 175.11896      | 88.06312        | 59.04450        | 1  |

Extracted from: Z:\712AB\SK17-S (Ac)\Chichi-Abaumannii-SK17-R-Acetyl\_DrWu\_20140512.raw #19195 RT: 54.08  
 ITMS, CID@35.00, z=+3, Mono m/z=1102.89282 Da, MH+=3306.66391 Da, Match Tol.=0.6 Da

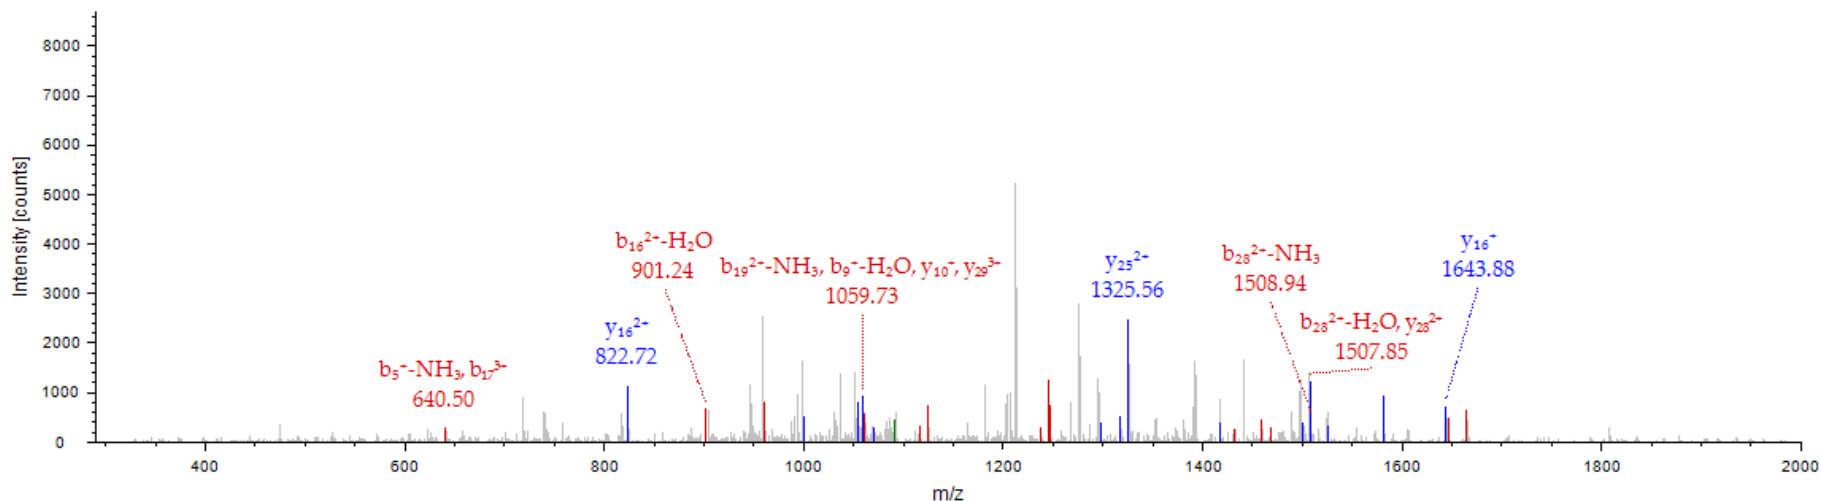

peg.1007 21648

| #1 | b <sup>+</sup> | b <sup>2+</sup> | b <sup>3+</sup> | Seq.     | y <sup>+</sup> | y <sup>2+</sup> | y <sup>3+</sup> | #2 |
|----|----------------|-----------------|-----------------|----------|----------------|-----------------|-----------------|----|
| 1  | 130.04987      | 65.52857        | 44.02147        | S-Acetyl |                |                 |                 | 25 |
| 2  | 300.15541      | 150.58134       | 100.72332       | K-Acetyl | 2661.27519     | 1331.14123      | 887.76325       | 24 |
| 3  | 415.18236      | 208.09482       | 139.06564       | D        | 2491.16966     | 1246.08847      | 831.06140       | 23 |
| 4  | 502.21439      | 251.61083       | 168.07631       | S        | 2376.14271     | 1188.57499      | 792.71909       | 22 |
| 5  | 589.24642      | 295.12685       | 197.08699       | S        | 2289.11068     | 1145.05898      | 763.70841       | 21 |
| 6  | 745.34754      | 373.17741       | 249.12070       | R        | 2202.07865     | 1101.54296      | 734.69773       | 20 |
| 7  | 892.41596      | 446.71162       | 298.14350       | F        | 2045.97753     | 1023.49240      | 682.66403       | 19 |
| 8  | 979.44799      | 490.22763       | 327.15418       | S        | 1898.90911     | 949.95819       | 633.64122       | 18 |
| 9  | 1092.53206     | 546.76967       | 364.84887       | I        | 1811.87708     | 906.44218       | 604.63054       | 17 |
| 10 | 1206.57499     | 603.79113       | 402.86318       | N        | 1698.79301     | 849.90014       | 566.93585       | 16 |
| 11 | 1303.62776     | 652.31752       | 435.21410       | P        | 1584.75008     | 792.87868       | 528.92154       | 15 |
| 12 | 1402.69618     | 701.85173       | 468.23691       | V        | 1487.69731     | 744.35229       | 496.57062       | 14 |
| 13 | 1516.73911     | 758.87319       | 506.25122       | N        | 1388.62889     | 694.81808       | 463.54781       | 13 |
| 14 | 1587.77623     | 794.39175       | 529.93026       | A        | 1274.58596     | 637.79662       | 425.53350       | 12 |
| 15 | 1702.80318     | 851.90523       | 568.27258       | D        | 1203.54884     | 602.27806       | 401.85446       | 11 |
| 16 | 1817.83013     | 909.41870       | 606.61489       | D        | 1088.52189     | 544.76458       | 363.51215       | 10 |
| 17 | 1904.86216     | 952.93472       | 635.62557       | S        | 973.49494      | 487.25111       | 325.16983       | 9  |
| 18 | 2003.93058     | 1002.46893      | 668.64838       | V        | 886.46291      | 443.73509       | 296.15915       | 8  |
| 19 | 2100.98335     | 1050.99531      | 700.99930       | P        | 787.39449      | 394.20088       | 263.13635       | 7  |
| 20 | 2229.04193     | 1115.02460      | 743.68549       | Q        | 690.34172      | 345.67450       | 230.78542       | 6  |
| 21 | 2286.06340     | 1143.53534      | 762.69265       | G        | 562.28314      | 281.64521       | 188.09923       | 5  |
| 22 | 2387.11108     | 1194.05918      | 796.37521       | T        | 505.26167      | 253.13447       | 169.09207       | 4  |
| 23 | 2501.15401     | 1251.08064      | 834.38952       | N        | 404.21399      | 202.61063       | 135.40951       | 3  |
| 24 | 2602.20169     | 1301.60448      | 868.07208       | T        | 290.17106      | 145.58917       | 97.39520        | 2  |
| 25 |                |                 |                 | K-Acetyl | 189.12338      | 95.06533        | 63.71264        | 1  |

Extracted from: Z:\712AB\SK17-S (Ac)\Chichi-Abaumanni-SK17-S-Acetyl\_DrWu\_20140512.raw #21648 RT: 65.46  
 ITMS, CID@35.00, z=+3, Mono m/z=930.77203 Da, MH+=2790.30155 Da, Match Tol.=0.6 Da

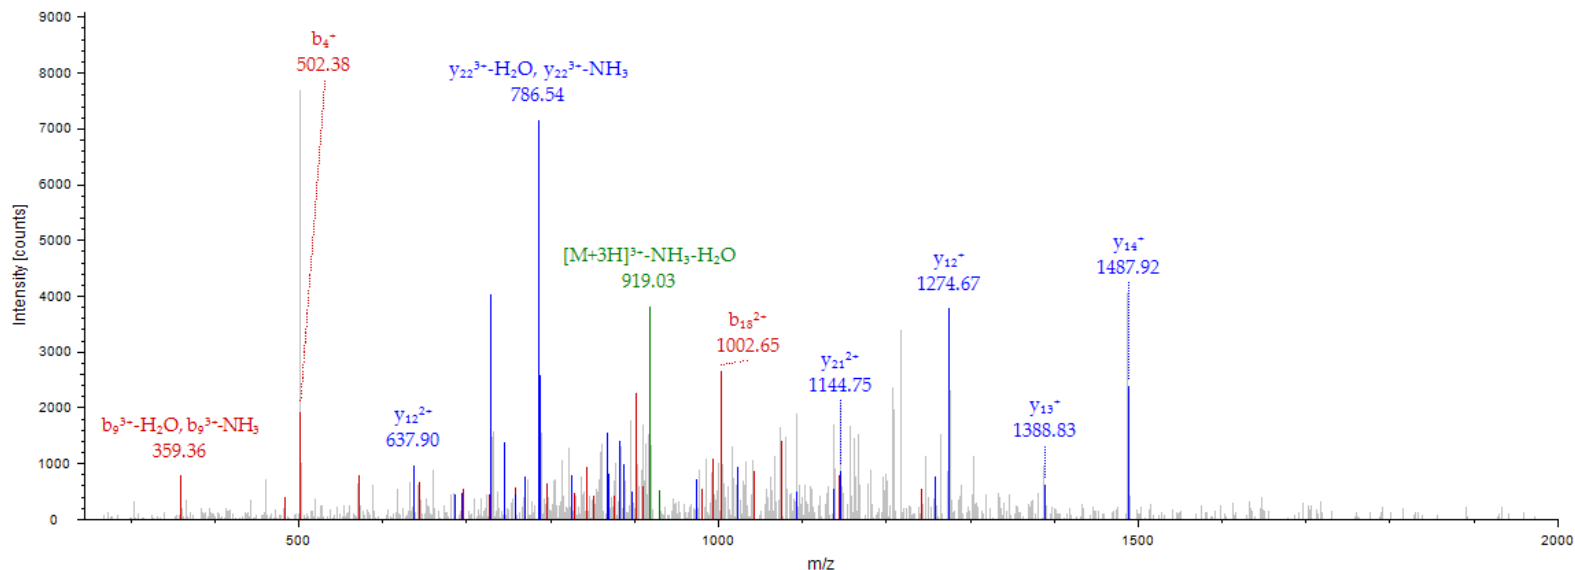



peg.1026 22581

| #1 | b <sup>+</sup> | b <sup>2+</sup> | b <sup>3+</sup> | Seq.     | y <sup>+</sup> | y <sup>2+</sup> | y <sup>3+</sup> | #2 |
|----|----------------|-----------------|-----------------|----------|----------------|-----------------|-----------------|----|
| 1  | 174.05834      | 87.53281        | 58.69096        | M-Acetyl |                |                 |                 | 18 |
| 2  | 261.09037      | 131.04882       | 87.70164        | S        | 1902.90402     | 951.95565       | 634.97286       | 17 |
| 3  | 431.19591      | 216.10159       | 144.40349       | K-Acetyl | 1815.87199     | 908.43963       | 605.96218       | 16 |
| 4  | 532.24359      | 266.62543       | 178.08605       | T        | 1645.76645     | 823.38686       | 549.26033       | 15 |
| 5  | 633.29127      | 317.14927       | 211.76861       | T        | 1544.71877     | 772.86302       | 515.57777       | 14 |
| 6  | 761.34985      | 381.17856       | 254.45480       | Q        | 1443.67109     | 722.33918       | 481.89521       | 13 |
| 7  | 890.39245      | 445.69986       | 297.46900       | E        | 1315.61251     | 658.30989       | 439.20902       | 12 |
| 8  | 1004.43538     | 502.72133       | 335.48331       | N        | 1186.56991     | 593.78859       | 396.19482       | 11 |
| 9  | 1101.48815     | 551.24771       | 367.83423       | P        | 1072.52698     | 536.76713       | 358.18051       | 10 |
| 10 | 1172.52527     | 586.76627       | 391.51327       | A        | 975.47421      | 488.24074       | 325.82959       | 9  |
| 11 | 1271.59369     | 636.30048       | 424.53608       | V        | 904.43709      | 452.72218       | 302.15055       | 8  |
| 12 | 1400.63629     | 700.82178       | 467.55028       | E        | 805.36867      | 403.18797       | 269.12774       | 7  |
| 13 | 1514.67922     | 757.84325       | 505.56459       | N        | 676.32607      | 338.66667       | 226.11354       | 6  |
| 14 | 1601.71125     | 801.35926       | 534.57527       | S        | 562.28314      | 281.64521       | 188.09923       | 5  |
| 15 | 1672.74837     | 836.87782       | 558.25431       | A        | 475.25111      | 238.12919       | 159.08855       | 4  |
| 16 | 1800.80695     | 900.90711       | 600.94050       | Q        | 404.21399      | 202.61063       | 135.40951       | 3  |
| 17 | 1929.84955     | 965.42841       | 643.95470       | E        | 276.15541      | 138.58134       | 92.72332        | 2  |
| 18 |                |                 |                 | K        | 147.11281      | 74.06004        | 49.70912        | 1  |

Extracted from: Z:\712ABISK17-S (Ac)\Chichi-Abaumannii-SK17-R-Acetyl\_DrWu\_20140512.raw #22581 RT: 64.25  
 ITMS, CID@35.00, z=+3, Mono m/z=692.65155 Da, MH+=2075.94010 Da, Match Tol.=0.6 Da

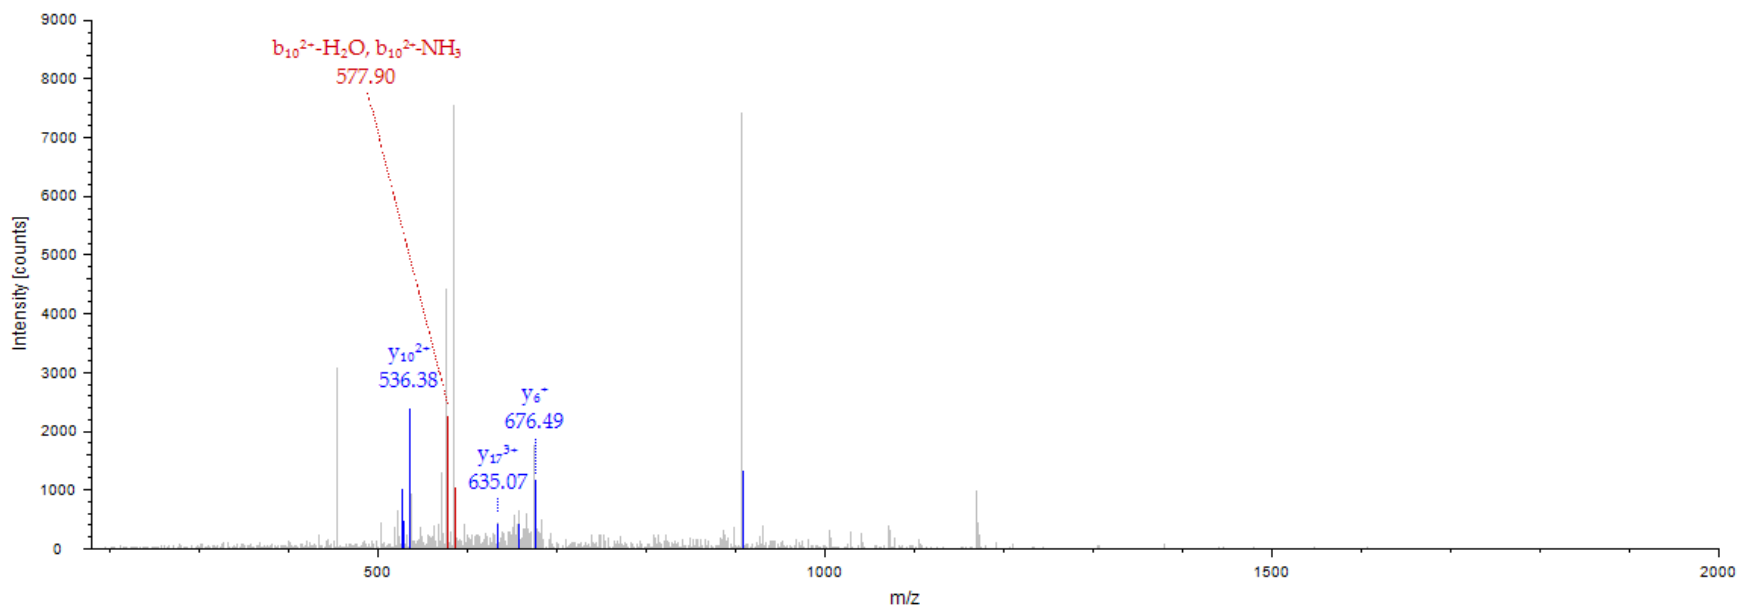

peg.1027 27375

peg.271 27375

| #1 | b <sup>+</sup> | b <sup>2+</sup> | b <sup>3+</sup> | Seq.     | y <sup>+</sup> | y <sup>2+</sup> | y <sup>3+</sup> | #2 |
|----|----------------|-----------------|-----------------|----------|----------------|-----------------|-----------------|----|
| 1  | 114.09135      | 57.54931        | 38.70197        | I        |                |                 |                 | 38 |
| 2  | 213.15977      | 107.08352       | 71.72477        | V        | 3690.03006     | 1845.51867      | 1230.68154      | 37 |
| 3  | 316.16896      | 158.58812       | 106.06117       | C        | 3590.96164     | 1795.98446      | 1197.65873      | 36 |
| 4  | 415.23738      | 208.12233       | 139.08398       | V        | 3487.95245     | 1744.47986      | 1163.32233      | 35 |
| 5  | 502.26941      | 251.63834       | 168.09465       | S        | 3388.88403     | 1694.94565      | 1130.29953      | 34 |
| 6  | 589.30144      | 295.15436       | 197.10533       | S        | 3301.85200     | 1651.42964      | 1101.28885      | 33 |
| 7  | 702.38551      | 351.69639       | 234.80002       | I        | 3214.81997     | 1607.91362      | 1072.27817      | 32 |
| 8  | 789.41754      | 395.21241       | 263.81070       | S        | 3101.73590     | 1551.37159      | 1034.58348      | 31 |
| 9  | 846.43901      | 423.72314       | 282.81785       | G        | 3014.70387     | 1507.85557      | 1005.57281      | 30 |
| 10 | 959.52308      | 480.26518       | 320.51254       | I        | 2957.68240     | 1479.34484      | 986.56565       | 29 |
| 11 | 1030.56020     | 515.78374       | 344.19158       | A        | 2844.59833     | 1422.80280      | 948.87096       | 28 |
| 12 | 1087.58167     | 544.29447       | 363.19874       | G        | 2773.56121     | 1387.28424      | 925.19192       | 27 |
| 13 | 1201.62460     | 601.31594       | 401.21305       | N        | 2716.53974     | 1358.77351      | 906.18476       | 26 |
| 14 | 1314.70867     | 657.85797       | 438.90774       | L        | 2602.49681     | 1301.75204      | 868.17045       | 25 |
| 15 | 1371.73014     | 686.36871       | 457.91490       | G        | 2489.41274     | 1245.21001      | 830.47576       | 24 |
| 16 | 1499.78872     | 750.39800       | 500.60109       | Q        | 2432.39127     | 1216.69927      | 811.46861       | 23 |
| 17 | 1600.83640     | 800.92184       | 534.28365       | T        | 2304.33269     | 1152.66998      | 768.78241       | 22 |
| 18 | 1714.87933     | 857.94330       | 572.29796       | N        | 2203.28501     | 1102.14614      | 735.09985       | 21 |
| 19 | 1877.94265     | 939.47496       | 626.65240       | Y        | 2089.24208     | 1045.12468      | 697.08554       | 20 |
| 20 | 1948.97977     | 974.99352       | 650.33144       | A        | 1926.17876     | 963.59302       | 642.73110       | 19 |
| 21 | 2020.01689     | 1010.51208      | 674.01048       | A        | 1855.14164     | 928.07446       | 619.05206       | 18 |
| 22 | 2107.04892     | 1054.02810      | 703.02116       | S        | 1784.10452     | 892.55590       | 595.37302       | 17 |
| 23 | 2277.15445     | 1139.08086      | 759.72300       | K-Acetyl | 1697.07249     | 849.03988       | 566.36235       | 16 |
| 24 | 2348.19157     | 1174.59942      | 783.40204       | A        | 1526.96695     | 763.98711       | 509.66050       | 15 |
| 25 | 2405.21304     | 1203.11016      | 802.40920       | G        | 1455.92983     | 728.46855       | 485.98146       | 14 |
| 26 | 2504.28146     | 1252.64437      | 835.43200       | V        | 1398.90836     | 699.95782       | 466.97430       | 13 |
| 27 | 2617.36553     | 1309.18640      | 873.12669       | I        | 1299.83994     | 650.42361       | 433.95150       | 12 |
| 28 | 2674.38700     | 1337.69714      | 892.13385       | G        | 1186.75587     | 593.88157       | 396.25681       | 11 |
| 29 | 2787.47107     | 1394.23917      | 929.82854       | L        | 1129.73440     | 565.37084       | 377.24965       | 10 |
| 30 | 2886.53949     | 1443.77338      | 962.85135       | V        | 1016.65033     | 508.82880       | 339.55496       | 9  |
| 31 | 3014.63446     | 1507.82087      | 1005.54967      | K        | 917.58191      | 459.29459       | 306.53215       | 8  |
| 32 | 3161.70288     | 1581.35508      | 1054.57248      | F        | 789.48694      | 395.24711       | 263.83383       | 7  |
| 33 | 3262.75056     | 1631.87892      | 1088.25504      | T        | 642.41852      | 321.71290       | 214.81102       | 6  |
| 34 | 3333.78768     | 1667.39748      | 1111.93408      | A        | 541.37084      | 271.18906       | 181.12846       | 5  |
| 35 | 3430.84045     | 1715.92386      | 1144.28500      | P        | 470.33372      | 235.67050       | 157.44942       | 4  |
| 36 | 3543.92452     | 1772.46590      | 1181.97969      | I        | 373.28095      | 187.14411       | 125.09850       | 3  |
| 37 | 3657.00859     | 1829.00793      | 1219.67438      | L        | 260.19688      | 130.60208       | 87.40381        | 2  |
| 38 |                |                 |                 | K        | 147.11281      | 74.06004        | 49.70912        | 1  |

Extracted from: Z:\712AB\SK17-S (Ac)\Chichi-Abbaumannil-SK17-R-Acetyl\_DrWu\_20140703.raw #27375 RT: 75.01  
ITMS, CID@35.00, z=+3, Mono m/z=1268.37878 Da, MH+=3803.12180 Da, Match Tol.=0.6 Da

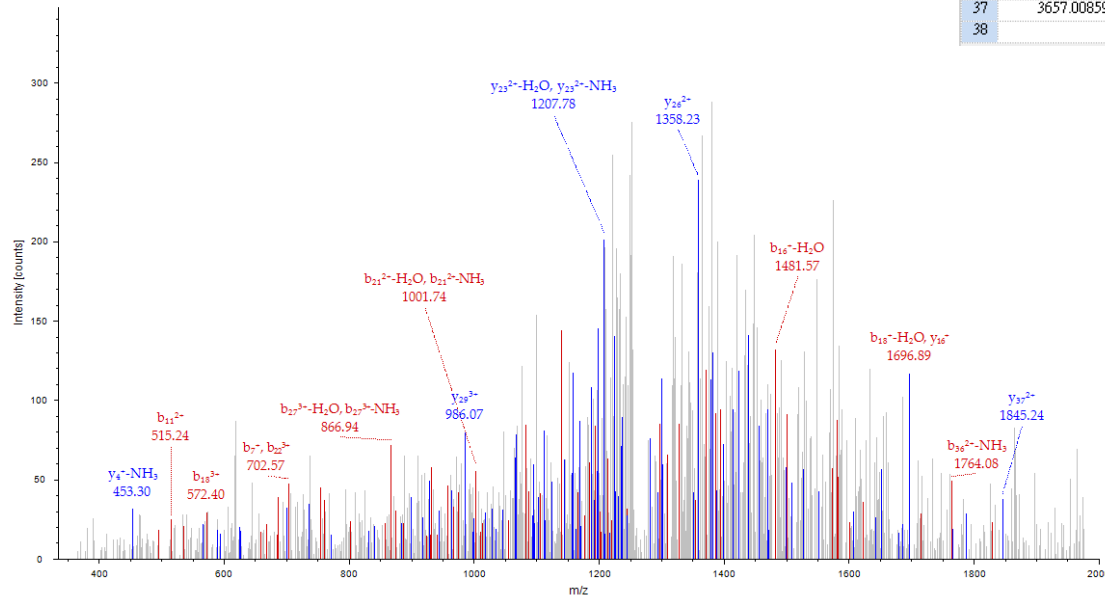

peg.1037

15752

| #1 | b <sup>+</sup> | b <sup>2+</sup> | Seq.     | y <sup>+</sup> | y <sup>2+</sup> | #2 |
|----|----------------|-----------------|----------|----------------|-----------------|----|
| 1  | 180.07675      | 90.54201        | H-Acetyl |                |                 | 18 |
| 2  | 311.11725      | 156.06226       | M        | 1984.96203     | 992.98465       | 17 |
| 3  | 410.18567      | 205.59647       | V        | 1853.92153     | 927.46440       | 16 |
| 4  | 557.25409      | 279.13068       | F        | 1754.85311     | 877.93019       | 15 |
| 5  | 644.28612      | 322.64670       | S        | 1607.78469     | 804.39598       | 14 |
| 6  | 741.33889      | 371.17308       | P        | 1520.75266     | 760.87997       | 13 |
| 7  | 855.38182      | 428.19455       | N        | 1423.69989     | 712.35358       | 12 |
| 8  | 912.40329      | 456.70528       | G        | 1309.65696     | 655.33212       | 11 |
| 9  | 1082.50883     | 541.75805       | K-Acetyl | 1252.63549     | 626.82138       | 10 |
| 10 | 1210.56741     | 605.78734       | Q        | 1082.52995     | 541.76861       | 9  |
| 11 | 1281.60453     | 641.30590       | A        | 954.47137      | 477.73932       | 8  |
| 12 | 1444.66785     | 722.83756       | Y        | 883.43425      | 442.22076       | 7  |
| 13 | 1557.75192     | 779.37960       | I        | 720.37093      | 360.68910       | 6  |
| 14 | 1658.79960     | 829.90344       | T        | 607.28686      | 304.14707       | 5  |
| 15 | 1729.83672     | 865.42200       | A        | 506.23918      | 253.62323       | 4  |
| 16 | 1858.87932     | 929.94330       | E        | 435.20206      | 218.10467       | 3  |
| 17 | 1989.91982     | 995.46355       | M        | 306.15946      | 153.58337       | 2  |
| 18 |                |                 | R        | 175.11896      | 88.06312        | 1  |

Extracted from: Z:\712AB\SK17-S (Ac)\Chichi-Abaumannii-SK17-R-Acetyl\_DrWu\_20140703.raw #15752 RT: 45.74  
ITMS, CID@35.00, z=+2, Mono m/z=1082.52368 Da, MH+=2164.04009 Da, Match Tol.=0.6 Da

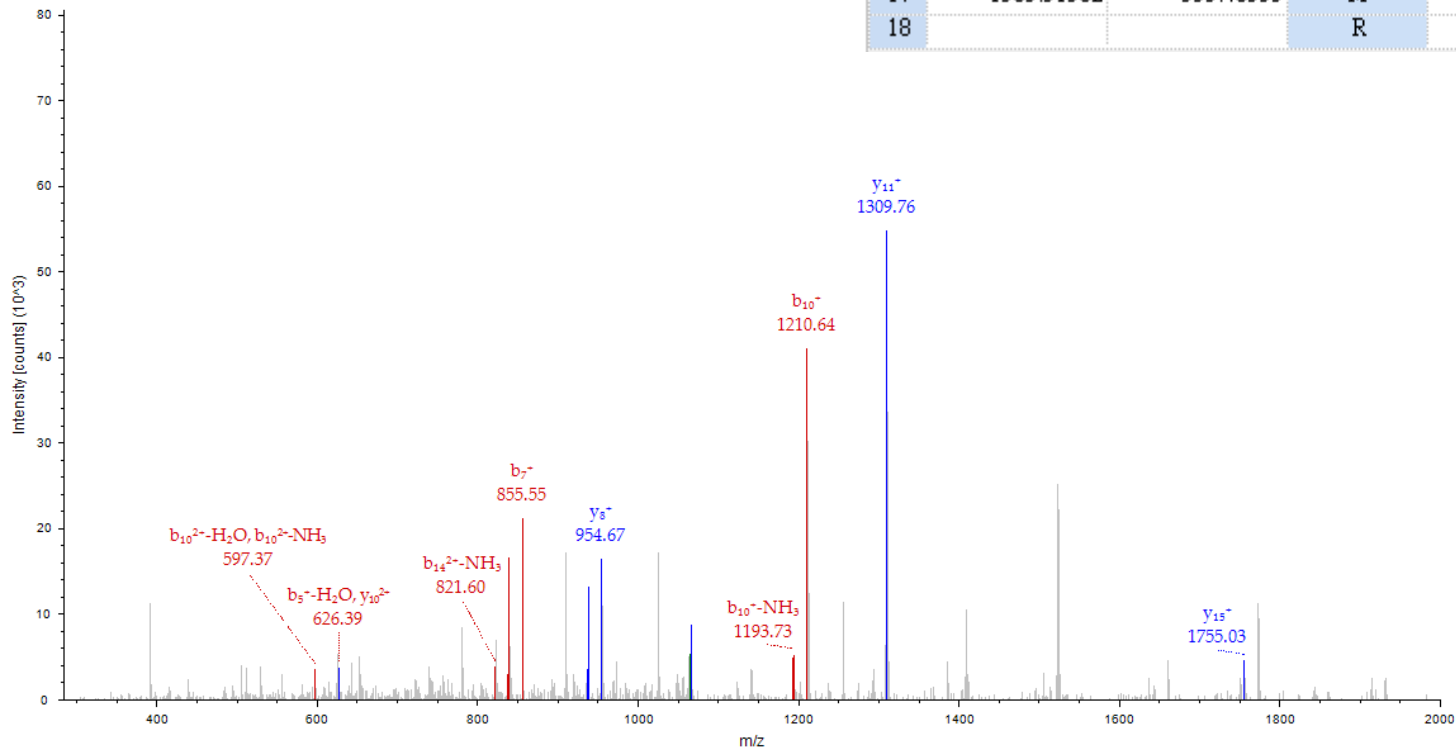

peg.1037 17517

| #1 | b <sup>+</sup> | b <sup>2+</sup> | Seq.     | y <sup>+</sup> | y <sup>2+</sup> | #2 |
|----|----------------|-----------------|----------|----------------|-----------------|----|
| 1  | 180.07675      | 90.54201        | H-Acetyl |                |                 | 18 |
| 2  | 311.11725      | 156.06226       | M        | 1984.96203     | 992.98465       | 17 |
| 3  | 410.18567      | 205.59647       | V        | 1853.92153     | 927.46440       | 16 |
| 4  | 557.25409      | 279.13068       | F        | 1754.85311     | 877.93019       | 15 |
| 5  | 644.28612      | 322.64670       | S        | 1607.78469     | 804.39598       | 14 |
| 6  | 741.33889      | 371.17308       | P        | 1520.75266     | 760.87997       | 13 |
| 7  | 855.38182      | 428.19455       | N        | 1423.69989     | 712.35358       | 12 |
| 8  | 912.40329      | 456.70528       | G        | 1309.65696     | 655.33212       | 11 |
| 9  | 1082.50883     | 541.75805       | K-Acetyl | 1252.63549     | 626.82138       | 10 |
| 10 | 1210.56741     | 605.78734       | Q        | 1082.52995     | 541.76861       | 9  |
| 11 | 1281.60453     | 641.30590       | A        | 954.47137      | 477.73932       | 8  |
| 12 | 1444.66785     | 722.83756       | Y        | 883.43425      | 442.22076       | 7  |
| 13 | 1557.75192     | 779.37960       | I        | 720.37093      | 360.68910       | 6  |
| 14 | 1658.79960     | 829.90344       | T        | 607.28686      | 304.14707       | 5  |
| 15 | 1729.83672     | 865.42200       | A        | 506.23918      | 253.62323       | 4  |
| 16 | 1858.87932     | 929.94330       | E        | 435.20206      | 218.10467       | 3  |
| 17 | 1989.91982     | 995.46355       | M        | 306.15946      | 153.58337       | 2  |
| 18 |                |                 | R        | 175.11896      | 88.06312        | 1  |

Extracted from: Z:\712AB\SK17-S (Ac)\Chichi-Abaumannii-SK17-S-Acetyl\_DrWu\_20140703.raw #17517 RT: 49.21  
 ITMS, CID@35.00, z=+2, Mono m/z=1082.52307 Da, MH+=2164.03887 Da, Match Tol.=0.6 Da

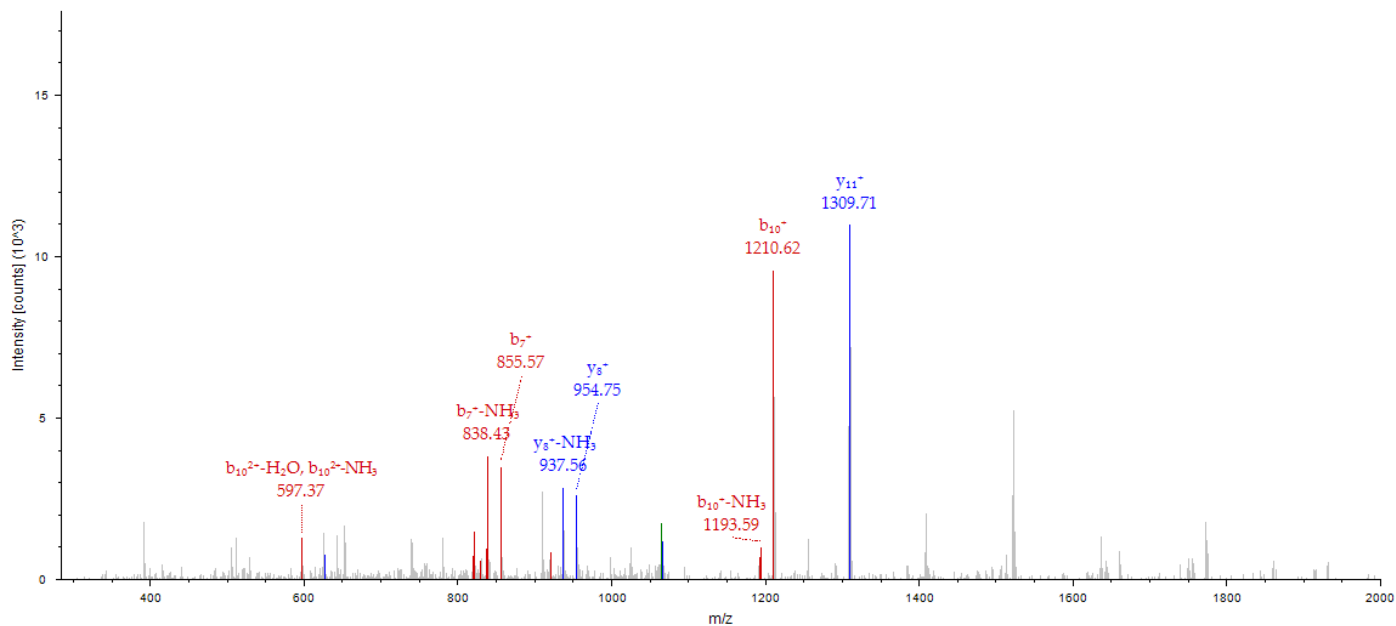

peg.1038 26132

| #1 | b <sup>+</sup> | b <sup>2+</sup> | Seq.     | y <sup>+</sup> | y <sup>2+</sup> | #2 |
|----|----------------|-----------------|----------|----------------|-----------------|----|
| 1  | 171.11281      | 86.06004        | K-Acetyl |                |                 | 10 |
| 2  | 327.21393      | 164.11060       | R        | 1066.56402     | 533.78565       | 9  |
| 3  | 384.23540      | 192.62134       | G        | 910.46290      | 455.73509       | 8  |
| 4  | 547.29872      | 274.15300       | Y        | 853.44143      | 427.22435       | 7  |
| 5  | 662.32567      | 331.66647       | D        | 690.37811      | 345.69269       | 6  |
| 6  | 775.40974      | 388.20851       | L        | 575.35116      | 288.17922       | 5  |
| 7  | 862.44177      | 431.72452       | S        | 462.26709      | 231.63718       | 4  |
| 8  | 949.47380      | 475.24054       | S        | 375.23506      | 188.12117       | 3  |
| 9  | 1062.55787     | 531.78257       | L        | 288.20303      | 144.60515       | 2  |
| 10 |                |                 | R        | 175.11896      | 88.06312        | 1  |

Extracted from: Z:\712ABISK17-S (Ac)\Chichi-Abaumannii-SK17-R-Acetyl\_DrWu\_20140512.raw #26132 RT: 76.19  
 ITMS, CID@35.00, z=+2, Mono m/z=618.83594 Da, MH+=1236.66460 Da, Match Tol.=0.6 Da

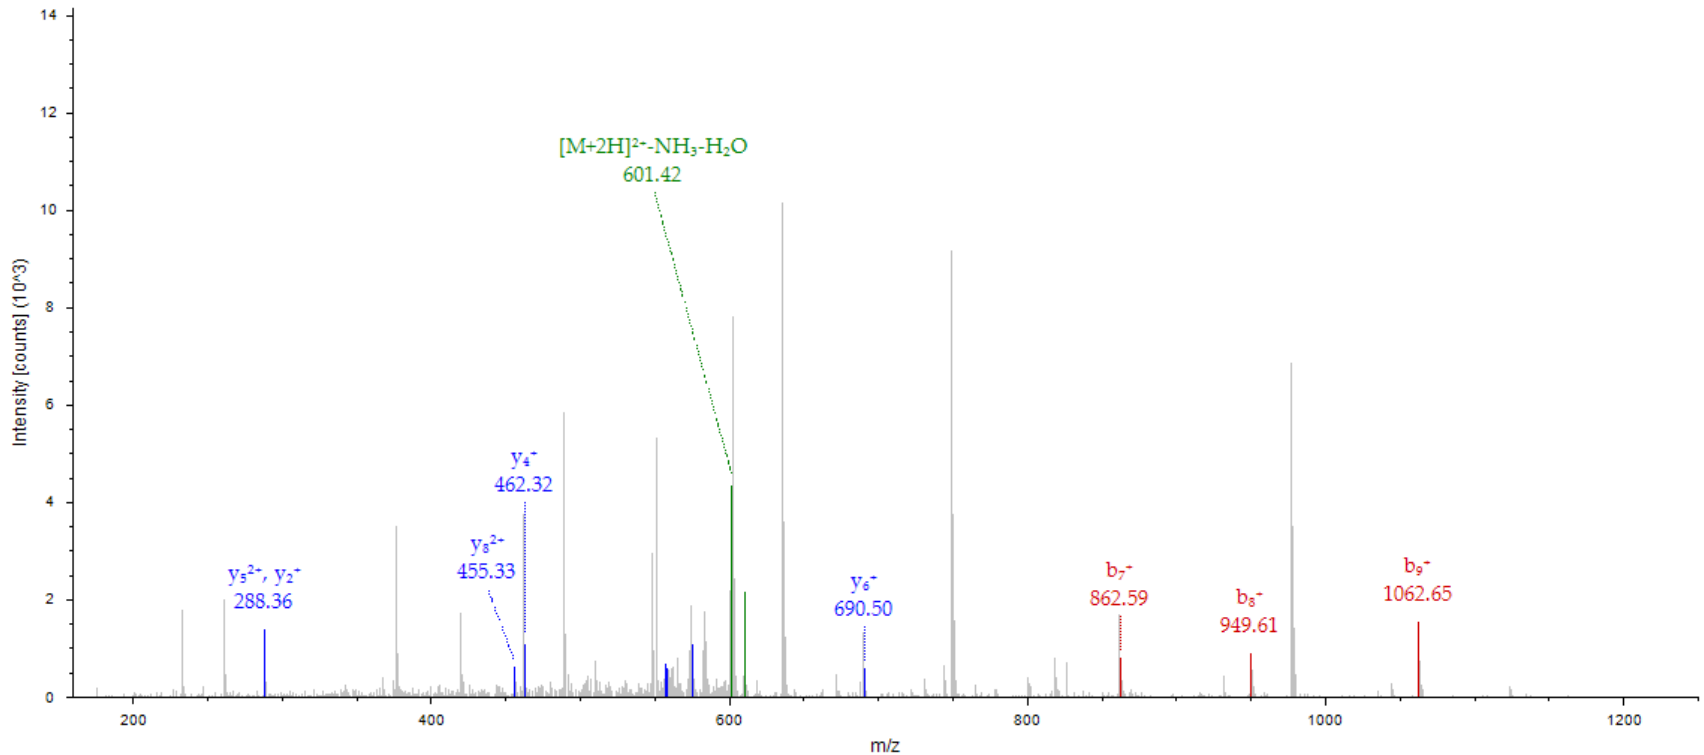

| #1 | b <sup>+</sup> | b <sup>2+</sup> | Seq.     | y <sup>+</sup> | y <sup>2+</sup> | #2 |
|----|----------------|-----------------|----------|----------------|-----------------|----|
| 1  | 114.05496      | 57.53112        | A-Acetyl |                |                 | 11 |
| 2  | 243.09756      | 122.05242       | E        | 1117.55969     | 559.28348       | 10 |
| 3  | 358.12451      | 179.56589       | D        | 988.51709      | 494.76218       | 9  |
| 4  | 486.21948      | 243.61338       | K        | 873.49014      | 437.24871       | 8  |
| 5  | 614.27806      | 307.64267       | Q        | 745.39517      | 373.20122       | 7  |
| 6  | 671.29953      | 336.15340       | G        | 617.33659      | 309.17193       | 6  |
| 7  | 841.40507      | 421.20617       | K-Acetyl | 560.31512      | 280.66120       | 5  |
| 8  | 898.42654      | 449.71691       | G        | 390.20958      | 195.60843       | 4  |
| 9  | 969.46366      | 485.23547       | A        | 333.18811      | 167.09769       | 3  |
| 10 | 1056.49569     | 528.75148       | S        | 262.15099      | 131.57913       | 2  |
| 11 |                |                 | R        | 175.11896      | 88.06312        | 1  |

Extracted from: Z:\712\ABISK17-S (Ac)\Chichi-Abaumanni-SK17-S-Acetyl\_DrWu\_20140512.raw #3522 RT: 19.01  
 ITMS, CID@35.00, z=+2, Mono m/z=615.80713 Da, MH+=1230.60698 Da, Match Tol=0.6 Da

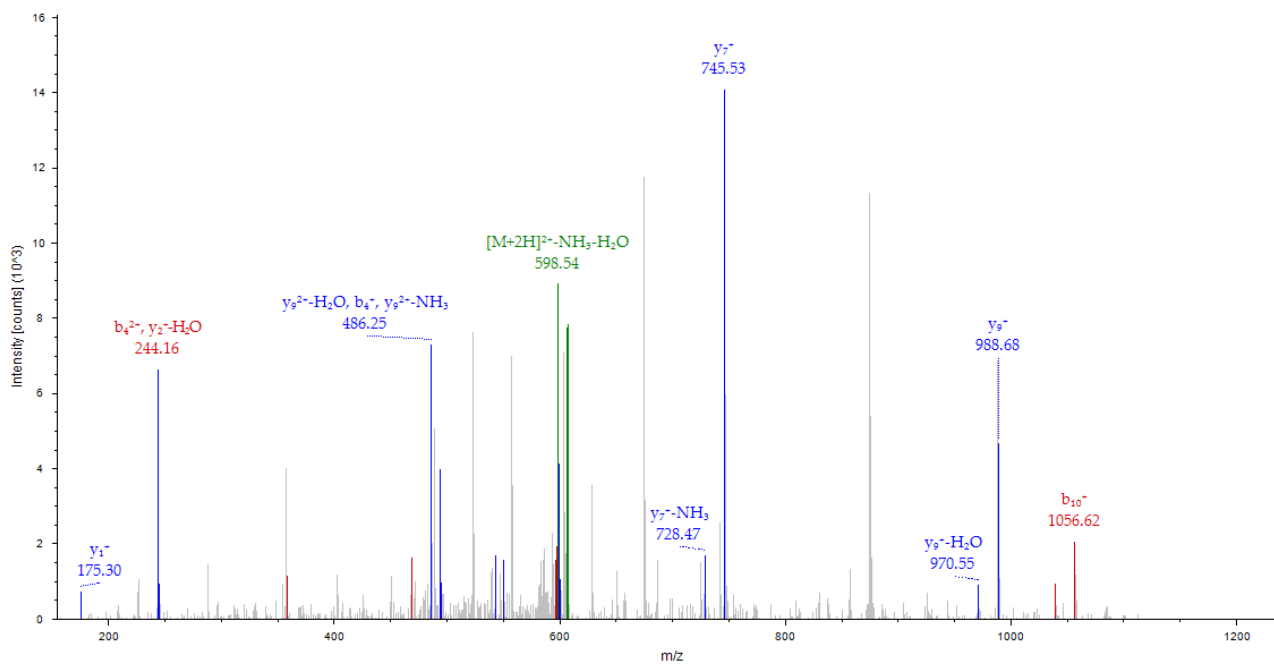

peg.113 22768

| #1 | b <sup>+</sup> | b <sup>2+</sup> | Seq.        | y <sup>+</sup> | y <sup>2+</sup> | #2 |
|----|----------------|-----------------|-------------|----------------|-----------------|----|
| 1  | 148.04269      | 74.52498        | M-Oxidation |                |                 | 15 |
| 2  | 277.08529      | 139.04628       | E           | 1705.85134     | 853.42931       | 14 |
| 3  | 390.16936      | 195.58832       | L           | 1576.80874     | 788.90801       | 13 |
| 4  | 518.22794      | 259.61761       | Q           | 1463.72467     | 732.36597       | 12 |
| 5  | 575.24941      | 288.12834       | G           | 1335.66609     | 668.33668       | 11 |
| 6  | 688.33348      | 344.67038       | I           | 1278.64462     | 639.82595       | 10 |
| 7  | 848.36414      | 424.68571       | C-Carbam*** | 1165.56055     | 583.28391       | 9  |
| 8  | 985.42305      | 493.21516       | H           | 1005.52989     | 503.26858       | 8  |
| 9  | 1155.52858     | 578.26793       | K-Acetyl    | 868.47098      | 434.73913       | 7  |
| 10 | 1286.56908     | 643.78818       | M           | 698.36545      | 349.68636       | 6  |
| 11 | 1423.62799     | 712.31763       | H           | 567.32495      | 284.16611       | 5  |
| 12 | 1494.66511     | 747.83619       | A           | 430.26604      | 215.63666       | 4  |
| 13 | 1551.68658     | 776.34693       | G           | 359.22892      | 180.11810       | 3  |
| 14 | 1664.77065     | 832.88896       | L           | 302.20745      | 151.60736       | 2  |
| 15 |                |                 | K-Acetyl    | 189.12338      | 95.06533        | 1  |

Extracted from: Z:\712AB\SK17-S (Ac)Chichi-Abaumannii-SK17-S-Acetyl\_DrWu\_20140512.raw #22768 RT: 68.72  
 ITMS, CID@35.00, z=+2, Mono m/z=926.94098 Da, MH+=1852.87468 Da, Match Tol.=0.6 Da

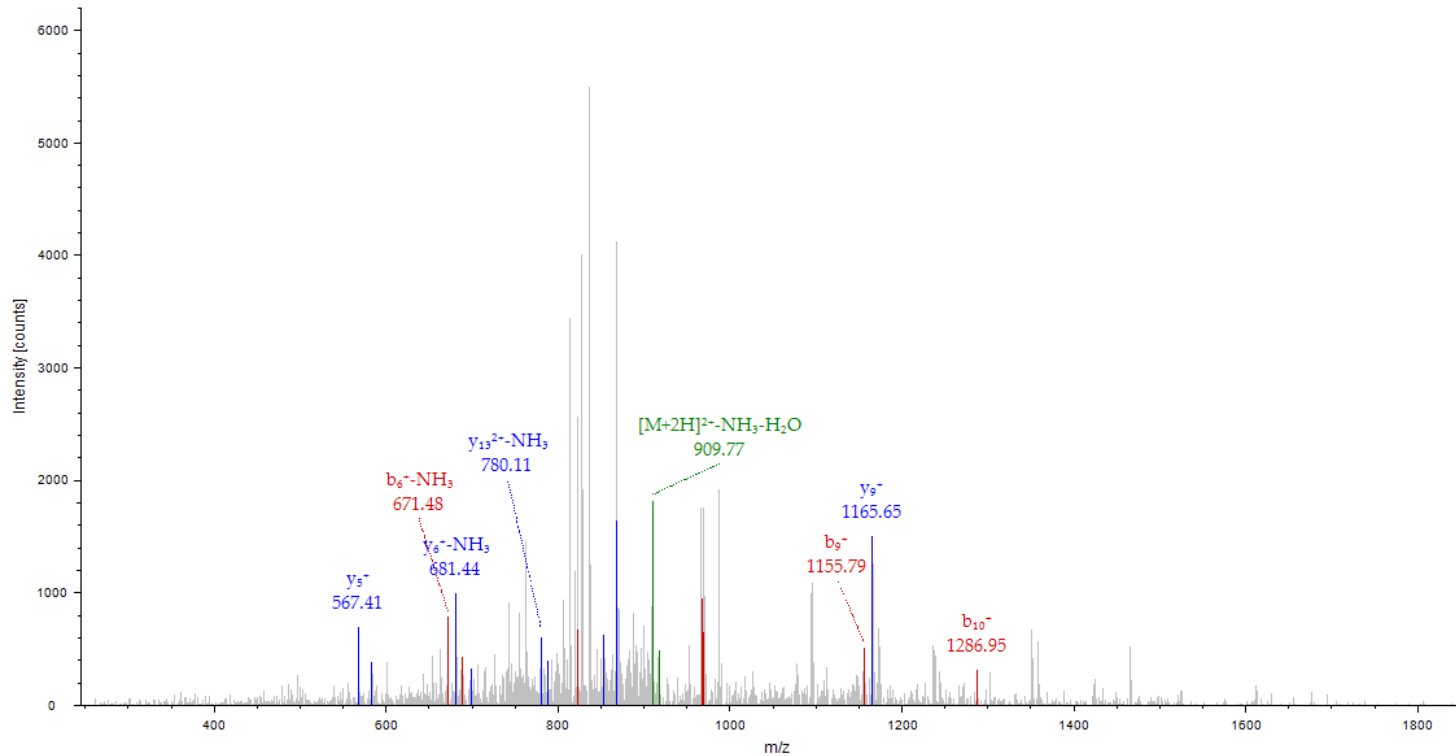

peg.1132 16322

| #1 | b <sup>+</sup> | b <sup>2+</sup> | b <sup>3+</sup> | Seq.     | y <sup>+</sup> | y <sup>2+</sup> | y <sup>3+</sup> | #2 |
|----|----------------|-----------------|-----------------|----------|----------------|-----------------|-----------------|----|
| 1  | 190.08626      | 95.54677        | 64.03360        | F-Acetyl |                |                 |                 | 23 |
| 2  | 305.11321      | 153.06024       | 102.37592       | D        | 2649.24031     | 1325.12379      | 883.75162       | 22 |
| 3  | 442.17212      | 221.58970       | 148.06222       | H        | 2534.21336     | 1267.61032      | 845.40930       | 21 |
| 4  | 513.20924      | 257.10826       | 171.74126       | A        | 2397.15445     | 1199.08086      | 799.72300       | 20 |
| 5  | 650.26815      | 325.63771       | 217.42757       | H        | 2326.11733     | 1163.56230      | 776.04396       | 19 |
| 6  | 820.37369      | 410.69048       | 274.12941       | K-Acetyl | 2189.05842     | 1095.03285      | 730.35766       | 18 |
| 7  | 935.40064      | 468.20396       | 312.47173       | D        | 2018.95289     | 1009.98008      | 673.65581       | 17 |
| 8  | 1098.46396     | 549.73562       | 366.82617       | Y        | 1903.92594     | 952.46661       | 635.31350       | 16 |
| 9  | 1245.53238     | 623.26983       | 415.84898       | F        | 1740.86262     | 870.93495       | 580.95906       | 15 |
| 10 | 1332.56441     | 666.78584       | 444.85965       | S        | 1593.79420     | 797.40074       | 531.93625       | 14 |
| 11 | 1502.66994     | 751.83861       | 501.56150       | K-Acetyl | 1506.76217     | 753.88472       | 502.92557       | 13 |
| 12 | 1630.72852     | 815.86790       | 544.24769       | Q        | 1336.65663     | 668.83195       | 446.22373       | 12 |
| 13 | 1743.81259     | 872.40993       | 581.94238       | I        | 1208.59805     | 604.80266       | 403.53753       | 11 |
| 14 | 1814.84971     | 907.92849       | 605.62142       | A        | 1095.51398     | 548.26063       | 365.84284       | 10 |
| 15 | 1929.87666     | 965.44197       | 643.96374       | D        | 1024.47686     | 512.74207       | 342.16380       | 9  |
| 16 | 2076.94508     | 1038.97618      | 692.98654       | F        | 909.44991      | 455.22859       | 303.82149       | 8  |
| 17 | 2179.95427     | 1090.48077      | 727.32294       | C        | 762.38149      | 381.69438       | 254.79868       | 7  |
| 18 | 2279.02269     | 1140.01498      | 760.34575       | V        | 659.37230      | 330.18979       | 220.46228       | 6  |
| 19 | 2394.04964     | 1197.52846      | 798.68806       | D        | 560.30388      | 280.65558       | 187.43948       | 5  |
| 20 | 2465.08676     | 1233.04702      | 822.36710       | A        | 445.27693      | 223.14210       | 149.09716       | 4  |
| 21 | 2564.15518     | 1282.58123      | 855.38991       | Y        | 374.23981      | 187.62354       | 125.41812       | 3  |
| 22 | 2692.21376     | 1346.61052      | 898.07610       | Q        | 275.17139      | 138.08933       | 92.39531        | 2  |
| 23 |                |                 |                 | K        | 147.11281      | 74.06004        | 49.70912        | 1  |

Extracted from: Z:\712AB\SK17-S (Ac)\Chichi-Abaumannii-SK17-S-Acetyl\_DrWu\_20140512.raw #16322 RT: 51.02  
 ITMS, CID@35.00, z=+3, Mono m/z=946.77405 Da, MH+=2838.30759 Da, Match Tol.=0.6 Da

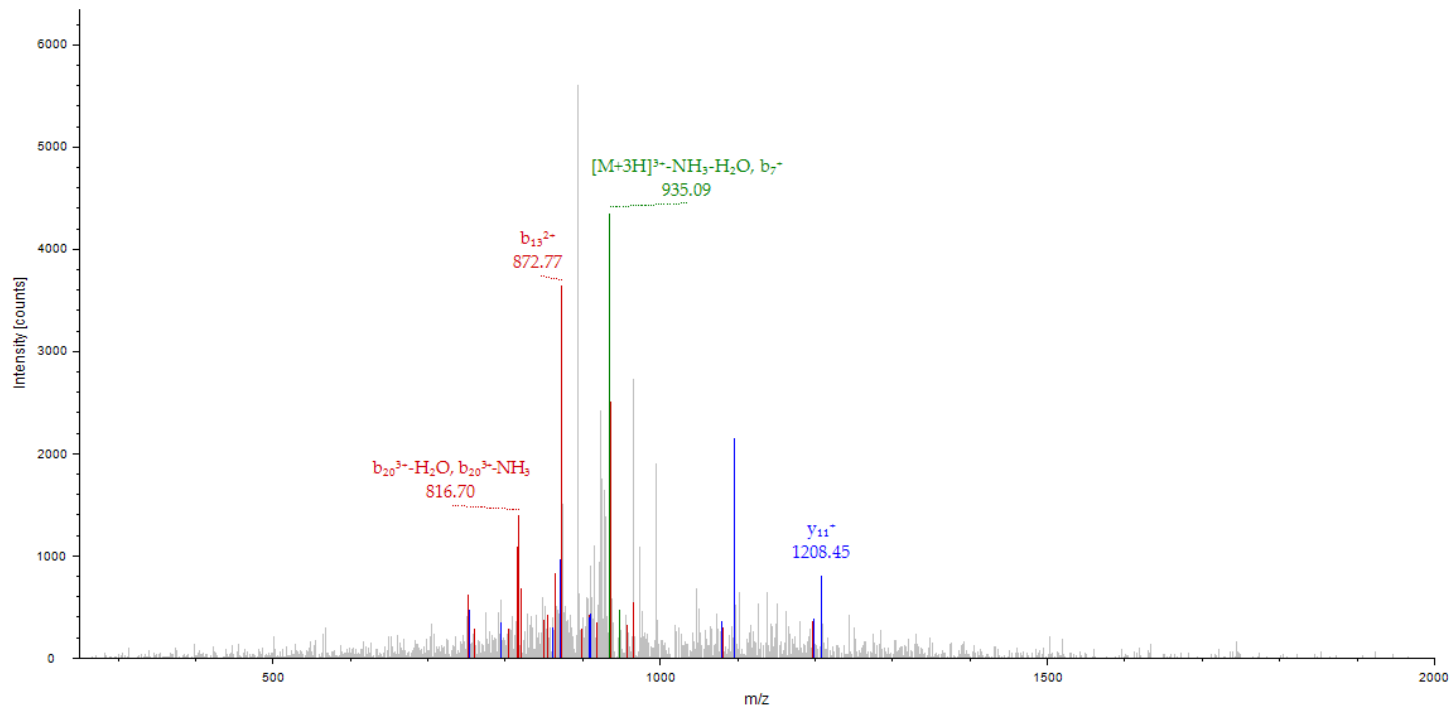



peg.1176 2951

| #1 | b <sup>+</sup> | b <sup>2+</sup> | Seq.     | y <sup>+</sup> | y <sup>2+</sup> | #2 |
|----|----------------|-----------------|----------|----------------|-----------------|----|
| 1  | 116.03423      | 58.52075        | D        |                |                 | 9  |
| 2  | 229.11830      | 115.06279       | L        | 1029.55755     | 515.28241       | 8  |
| 3  | 357.17688      | 179.09208       | Q        | 916.47348      | 458.74038       | 7  |
| 4  | 471.21981      | 236.11354       | N        | 788.41490      | 394.71109       | 6  |
| 5  | 600.26241      | 300.63484       | E        | 674.37197      | 337.68962       | 5  |
| 6  | 713.34648      | 357.17688       | L        | 545.32937      | 273.16832       | 4  |
| 7  | 883.45201      | 442.22964       | K-Acetyl | 432.24530      | 216.62629       | 3  |
| 8  | 998.47896      | 499.74312       | D        | 262.13976      | 131.57352       | 2  |
| 9  |                |                 | K        | 147.11281      | 74.06004        | 1  |

Extracted from: Z:\712AB\SK17-S (Ac)\Chichi-Abaumannii-SK17-S-Acetyl\_DrWu\_20140703.raw #2951 RT: 14.95  
 ITMS, CID@35.00, z=+2, Mono m/z=572.79669 Da, MH+=1144.58611 Da, Match Tol.=0.6 Da

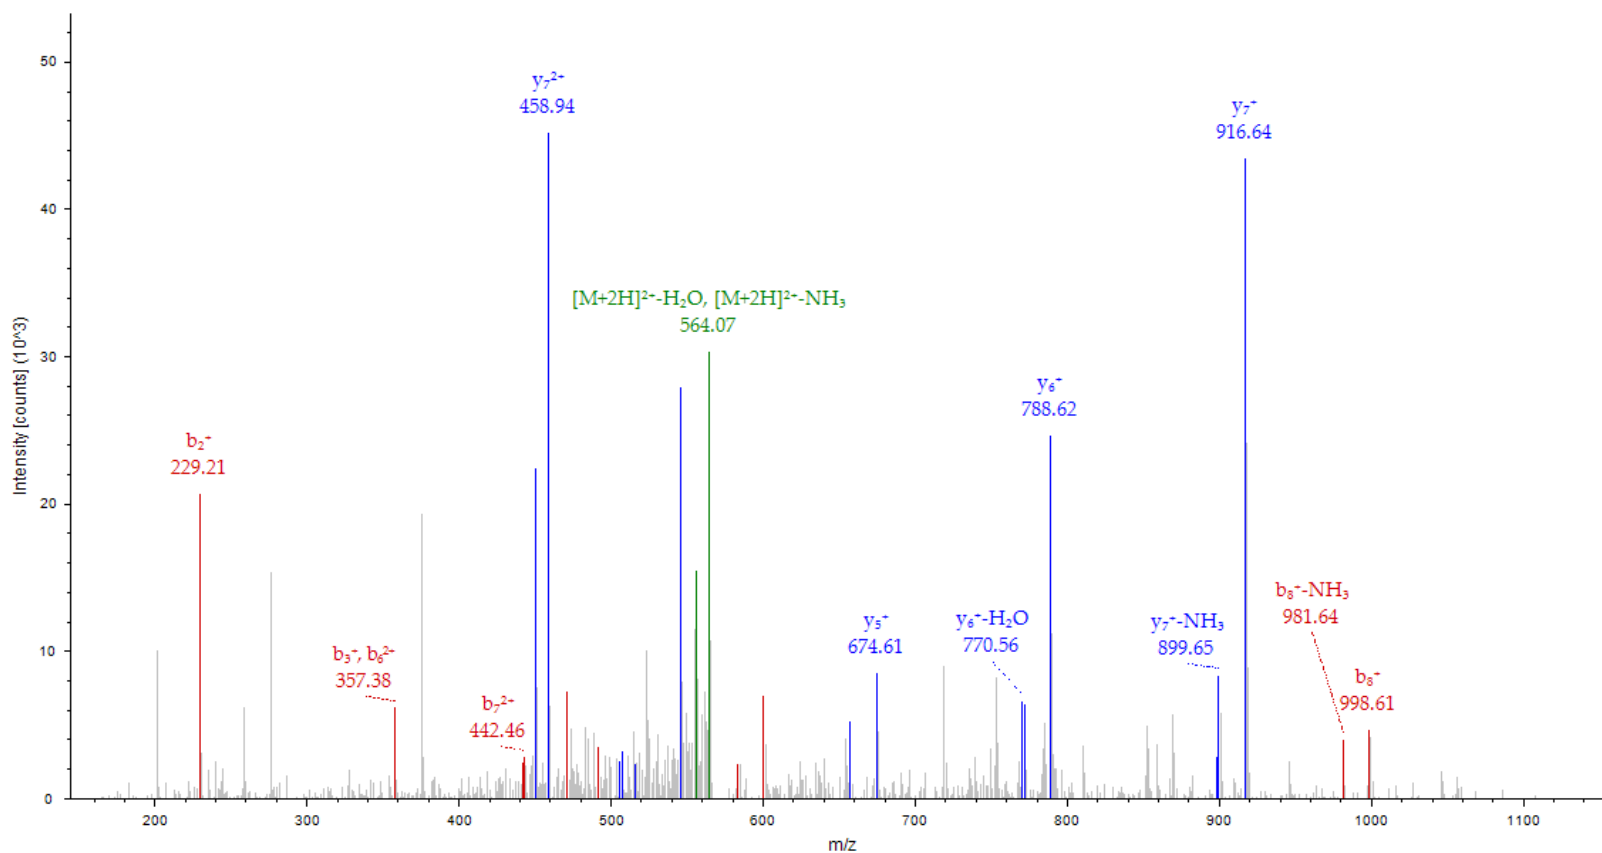

peg.1187 1744

| #1 | b <sup>+</sup> | b <sup>2+</sup> | b <sup>3+</sup> | Seq.        | y <sup>+</sup> | y <sup>2+</sup> | y <sup>3+</sup> | #2 |
|----|----------------|-----------------|-----------------|-------------|----------------|-----------------|-----------------|----|
| 1  | 102.05496      | 51.53112        | 34.68984        | T           |                |                 |                 | 10 |
| 2  | 217.08191      | 109.04459       | 73.03215        | D           | 1090.55619     | 545.78173       | 364.19025       | 9  |
| 3  | 288.11903      | 144.56315       | 96.71119        | A           | 975.52924      | 488.26826       | 325.84793       | 8  |
| 4  | 435.15444      | 218.08086       | 145.72300       | M-Oxidation | 904.49212      | 452.74970       | 302.16889       | 7  |
| 5  | 548.23851      | 274.62289       | 183.41769       | L           | 757.45671      | 379.23199       | 253.15709       | 6  |
| 6  | 605.25998      | 303.13363       | 202.42484       | G           | 644.37264      | 322.68996       | 215.46240       | 5  |
| 7  | 775.36552      | 388.18640       | 259.12669       | K-Acetyl    | 587.35117      | 294.17922       | 196.45524       | 4  |
| 8  | 888.44959      | 444.72843       | 296.82138       | I           | 417.24563      | 209.12645       | 139.75339       | 3  |
| 9  | 1017.49219     | 509.24973       | 339.83558       | E           | 304.16156      | 152.58442       | 102.05870       | 2  |
| 10 |                |                 |                 | R           | 175.11896      | 88.06312        | 59.04450        | 1  |

Extracted from: Z:\712ABISK17-S (Ac)Chichi-Abaumannil-SK17-R-Acetyl\_DrWu\_20140703.raw #1744 RT: 12.54  
 ITMS, CID@35.00, z=+3, Mono m/z=397.87650 Da, MH+=1191.61493 Da, Match Tol.=0.6 Da

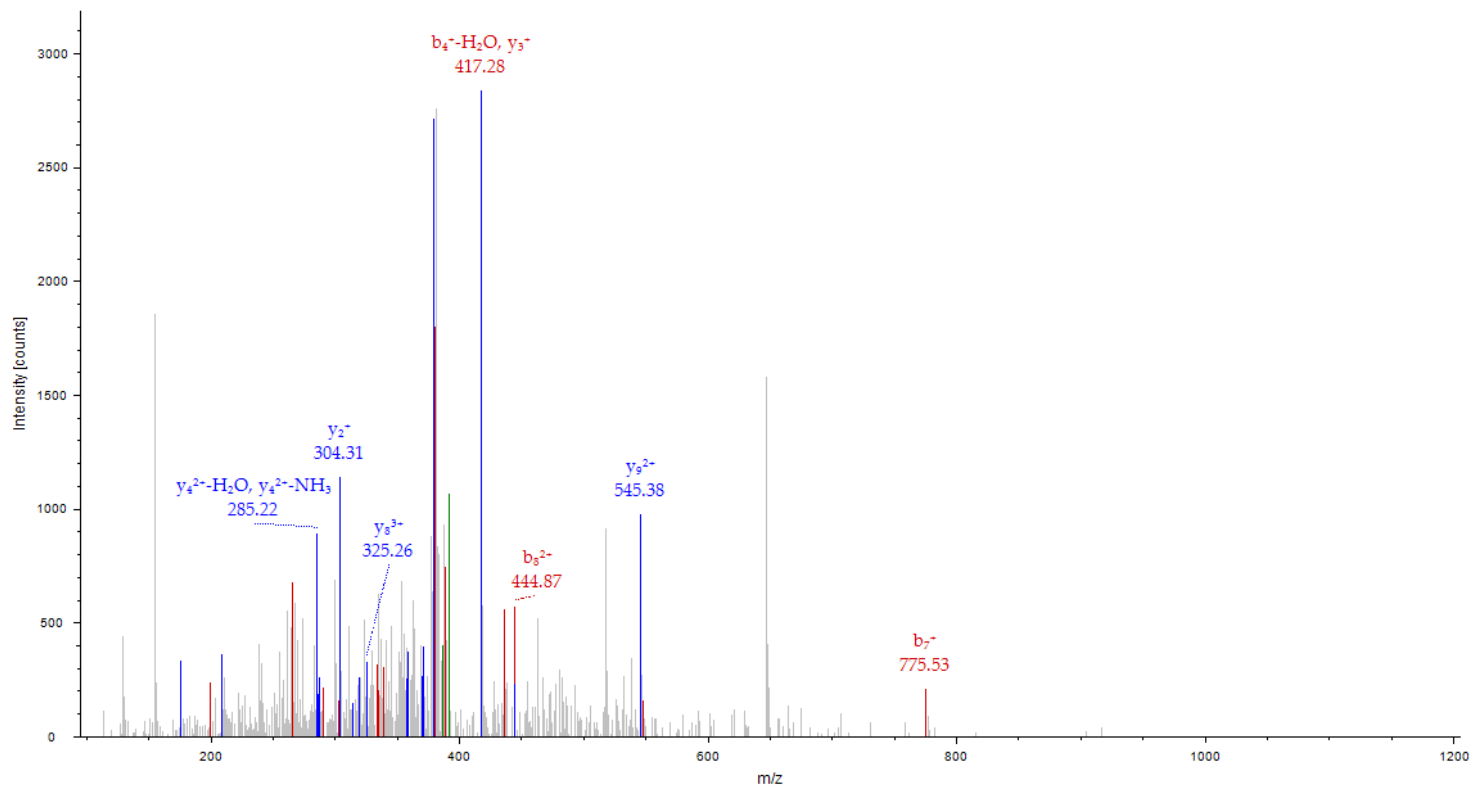

# peg.1211 26137

| #1 | b <sup>+</sup> | b <sup>2+</sup> | b <sup>3+</sup> | Seq.        | y <sup>+</sup> | y <sup>2+</sup> | y <sup>3+</sup> | #2 |
|----|----------------|-----------------|-----------------|-------------|----------------|-----------------|-----------------|----|
| 1  | 130.04987      | 65.52857        | 44.02147        | S-Acetyl    |                |                 |                 | 22 |
| 2  | 245.07682      | 123.04205       | 82.36379        | D           | 2639.32872     | 1320.16800      | 880.44776       | 21 |
| 3  | 332.10885      | 166.55806       | 111.37447       | S           | 2524.30177     | 1262.65452      | 842.10544       | 20 |
| 4  | 495.17217      | 248.08972       | 165.72891       | Y           | 2437.26974     | 1219.13851      | 813.09476       | 19 |
| 5  | 658.23549      | 329.62138       | 220.08335       | Y           | 2274.20642     | 1137.60685      | 758.74032       | 18 |
| 6  | 759.28317      | 380.14522       | 253.76591       | T           | 2111.14310     | 1056.07519      | 704.38588       | 17 |
| 7  | 830.32029      | 415.66378       | 277.44495       | A           | 2010.09542     | 1005.55135      | 670.70332       | 16 |
| 8  | 943.40436      | 472.20582       | 315.13964       | L           | 1939.05830     | 970.03279       | 647.02428       | 15 |
| 9  | 1071.46294     | 536.23511       | 357.82583       | Q           | 1825.97423     | 913.49075       | 609.32959       | 14 |
| 10 | 1227.56406     | 614.28567       | 409.85954       | R           | 1697.91565     | 849.46146       | 566.64340       | 13 |
| 11 | 1298.60118     | 649.80423       | 433.53858       | A           | 1541.81453     | 771.41090       | 514.60969       | 12 |
| 12 | 1412.64411     | 706.82569       | 471.55289       | N           | 1470.77741     | 735.89234       | 490.93065       | 11 |
| 13 | 1572.67477     | 786.84102       | 524.89644       | C-Carbam... | 1356.73448     | 678.87088       | 452.91634       | 10 |
| 14 | 1742.78030     | 871.89379       | 581.59828       | K-Acetyl    | 1196.70382     | 598.85555       | 399.57279       | 9  |
| 15 | 1855.86437     | 928.43582       | 619.29297       | L           | 1026.59829     | 513.80278       | 342.87095       | 8  |
| 16 | 1983.92295     | 992.46511       | 661.97917       | Q           | 913.51422      | 457.26075       | 305.17626       | 7  |
| 17 | 2084.97063     | 1042.98895      | 695.66173       | T           | 785.45564      | 393.23146       | 262.49006       | 6  |
| 18 | 2271.04995     | 1136.02861      | 757.68817       | W           | 684.40796      | 342.70762       | 228.80750       | 5  |
| 19 | 2368.10272     | 1184.55500      | 790.03909       | P           | 498.32864      | 249.66796       | 166.78106       | 4  |
| 20 | 2481.18679     | 1241.09703      | 827.73378       | I           | 401.27587      | 201.14157       | 134.43014       | 3  |
| 21 | 2580.25521     | 1290.63124      | 860.75659       | V           | 288.19180      | 144.59954       | 96.73545        | 2  |
| 22 |                |                 |                 | K-Acetyl    | 189.12338      | 95.06533        | 63.71264        | 1  |

Extracted from: Z:\712AB\SK17-S (Ac)\Chichi-Abaumanni-SK17-S-Acetyl\_DrWu\_20140512.raw #26137 RT: 79.01  
 ITMS, CID@35.00, z=+3, Mono m/z=923.45593 Da, MH+=2768.35324 Da, Match Tol.=0.6 Da

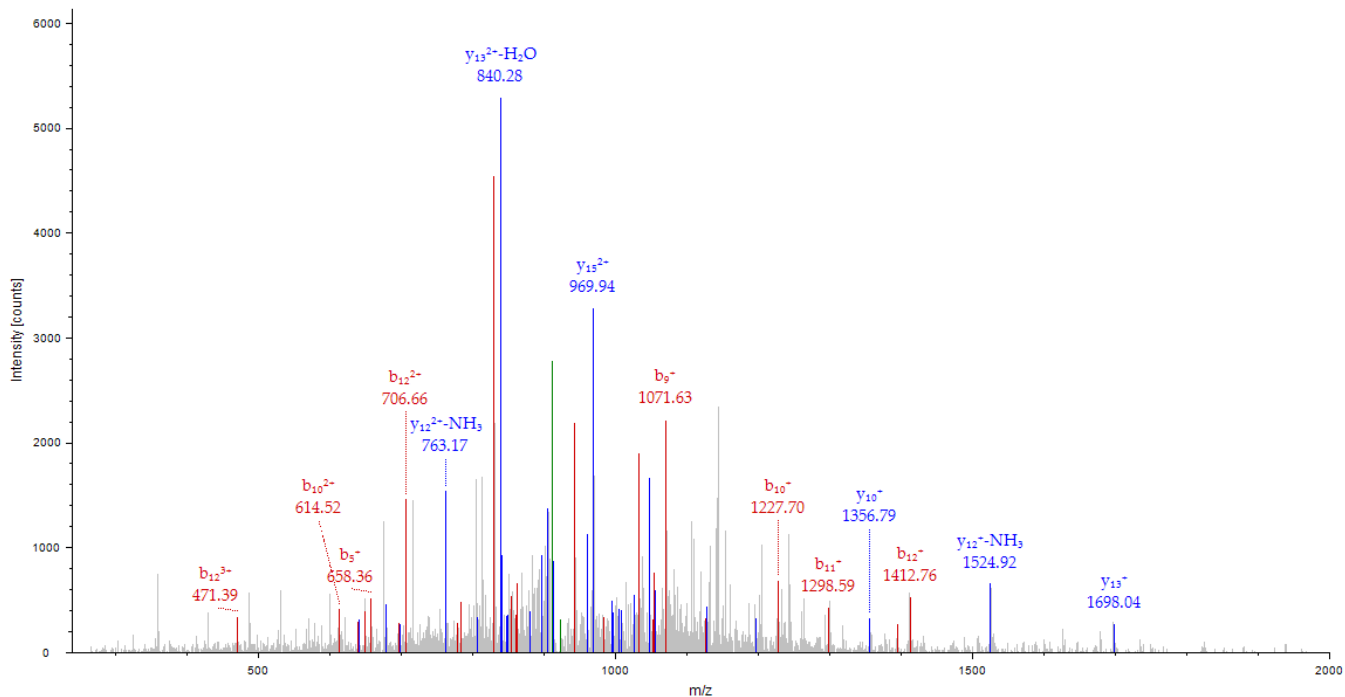

# peg.1225 26260

| #1 | b <sup>+</sup> | b <sup>2+</sup> | b <sup>3+</sup> | Seq.        | y <sup>+</sup> | y <sup>2+</sup> | y <sup>3+</sup> | #2 |
|----|----------------|-----------------|-----------------|-------------|----------------|-----------------|-----------------|----|
| 1  | 114.09135      | 57.54931        | 38.70197        | L           |                |                 |                 | 35 |
| 2  | 229.11830      | 115.06279       | 77.04428        | D           | 3933.92255     | 1967.46491      | 1311.97903      | 34 |
| 3  | 344.14525      | 172.57626       | 115.38660       | D           | 3818.89560     | 1909.95144      | 1273.63672      | 33 |
| 4  | 441.19802      | 221.10265       | 147.73752       | P           | 3703.86865     | 1852.43796      | 1235.29440      | 32 |
| 5  | 569.25660      | 285.13194       | 190.42372       | Q           | 3606.81588     | 1803.91158      | 1202.94348      | 31 |
| 6  | 739.36213      | 370.18470       | 247.12556       | K-Acetyl    | 3478.75730     | 1739.88209      | 1160.25728      | 30 |
| 7  | 852.44620      | 426.72674       | 284.82025       | L           | 3308.65177     | 1654.82952      | 1103.55544      | 29 |
| 8  | 981.48880      | 491.24804       | 327.83445       | E           | 3195.56770     | 1598.28749      | 1065.86075      | 28 |
| 9  | 1118.54771     | 559.77749       | 373.52075       | H           | 3066.52510     | 1533.76619      | 1022.84655      | 27 |
| 10 | 1278.57837     | 639.79282       | 426.86431       | C-Carbam... | 2929.46619     | 1465.23673      | 977.16025       | 26 |
| 11 | 1335.59984     | 668.30356       | 445.87146       | G           | 2769.43553     | 1385.22140      | 923.81669       | 25 |
| 12 | 1434.66826     | 717.83777       | 478.89427       | V           | 2712.41406     | 1356.71067      | 904.80954       | 24 |
| 13 | 1563.71086     | 782.35907       | 521.90847       | E           | 2613.34564     | 1307.17646      | 871.78673       | 23 |
| 14 | 1676.79493     | 838.90110       | 559.60316       | L           | 2484.30304     | 1242.65516      | 828.77253       | 22 |
| 15 | 1823.86335     | 912.43531       | 608.62597       | F           | 2371.21897     | 1186.11312      | 791.07784       | 21 |
| 16 | 1986.92667     | 993.96697       | 662.98041       | Y           | 2224.15055     | 1112.57891      | 742.05503       | 20 |
| 17 | 2114.98525     | 1057.99626      | 705.66660       | Q           | 2061.08723     | 1031.04725      | 687.70059       | 19 |
| 18 | 2243.08022     | 1122.04375      | 748.36492       | K           | 1933.02865     | 967.01796       | 645.01440       | 18 |
| 19 | 2358.10717     | 1179.55722      | 786.70724       | D           | 1804.93368     | 902.97048       | 602.31608       | 17 |
| 20 | 2471.19124     | 1236.09926      | 824.40193       | L           | 1689.90673     | 845.45700       | 563.97376       | 16 |
| 21 | 2572.23892     | 1286.62310      | 858.08449       | T           | 1576.82266     | 788.91497       | 526.27907       | 15 |
| 22 | 2659.27095     | 1330.13911      | 887.09517       | S           | 1475.77498     | 738.39113       | 492.59651       | 14 |
| 23 | 2756.32372     | 1378.66550      | 919.44609       | P           | 1388.74295     | 694.87511       | 463.58583       | 13 |
| 24 | 2869.40779     | 1435.20753      | 957.14078       | L           | 1291.69018     | 646.34873       | 431.23491       | 12 |
| 25 | 2988.47621     | 1484.74174      | 990.16359       | V           | 1178.60611     | 589.80669       | 393.54022       | 11 |
| 26 | 3055.50824     | 1528.25776      | 1019.17426      | S           | 1079.53769     | 540.27248       | 360.51741       | 10 |
| 27 | 3112.52971     | 1556.76849      | 1038.18142      | G           | 992.50566      | 496.75647       | 331.50674       | 9  |
| 28 | 3215.53890     | 1608.27309      | 1072.51782      | C           | 935.48419      | 468.24573       | 312.49958       | 8  |
| 29 | 3328.62297     | 1664.81512      | 1110.21251      | I           | 832.47500      | 416.74114       | 278.16318       | 7  |
| 30 | 3399.66009     | 1700.33368      | 1133.89155      | A           | 719.39093      | 360.19910       | 240.46849       | 6  |
| 31 | 3585.73941     | 1793.37334      | 1195.91799      | W           | 648.35381      | 324.68054       | 216.78945       | 5  |
| 32 | 3698.82348     | 1849.91538      | 1233.61268      | L           | 462.27449      | 231.64080       | 154.76301       | 4  |
| 33 | 3797.89190     | 1899.44959      | 1266.63548      | Y           | 349.19042      | 175.09885       | 117.06832       | 3  |
| 34 | 3900.90109     | 1950.95418      | 1300.97188      | C           | 250.12200      | 125.56464       | 84.04552        | 2  |
| 35 |                |                 |                 | K           | 147.11281      | 74.06004        | 49.70912        | 1  |

Extracted from: Z:1712AB|SK17-S (Ac)Chichi-Abuamanni-SK17-S-Acetyl\_DrWu\_20140703.raw #26260 RT: 71.90  
 IMS, CID@35.00, z=+3, Mono m/z=1349.68164 Da, MH+=4047.03037 Da, Match Tol.=0.6 Da

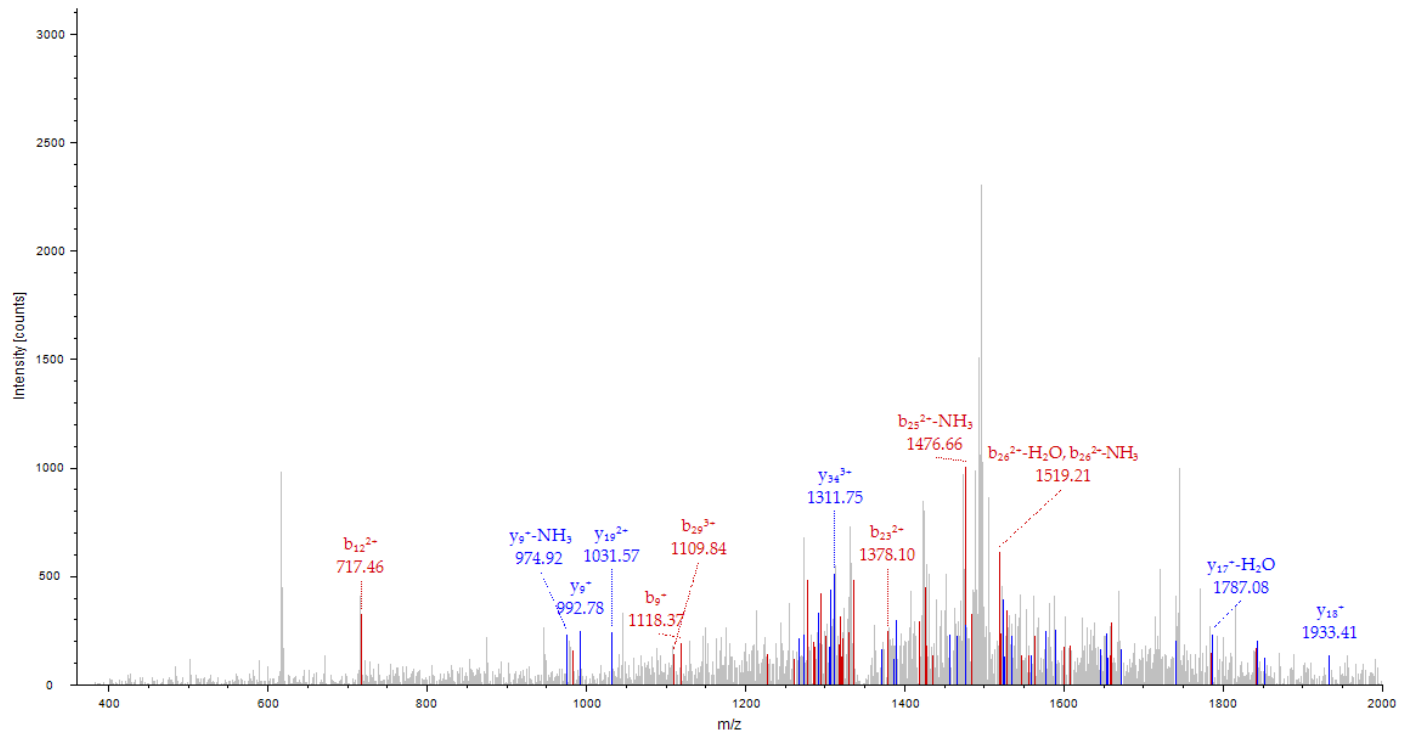

peg.1241 30175

| #1 | b <sup>+</sup> | b <sup>2+</sup> | b <sup>3+</sup> | Seq.     | y <sup>+</sup> | y <sup>2+</sup> | y <sup>3+</sup> | #2 |
|----|----------------|-----------------|-----------------|----------|----------------|-----------------|-----------------|----|
| 1  | 130.04987      | 65.52857        | 44.02147        | S-Acetyl |                |                 |                 | 30 |
| 2  | 244.09280      | 122.55004       | 82.03578        | N        | 3256.64162     | 1628.82445      | 1086.21872      | 29 |
| 3  | 359.11975      | 180.06351       | 120.37810       | D        | 3142.98689     | 1571.80298      | 1048.20441      | 28 |
| 4  | 458.18817      | 229.59772       | 153.40091       | Y        | 3027.57174     | 1514.28951      | 1009.86210      | 27 |
| 5  | 572.23110      | 286.61919       | 191.41522       | N        | 2928.50332     | 1464.75530      | 976.83929       | 26 |
| 6  | 643.26822      | 322.13775       | 215.09426       | A        | 2814.46039     | 1407.73383      | 938.82498       | 25 |
| 7  | 756.35229      | 378.67978       | 252.78895       | L        | 2743.42327     | 1372.21527      | 915.14594       | 24 |
| 8  | 919.41561      | 460.21144       | 307.14339       | Y        | 2630.33920     | 1315.67324      | 877.45125       | 23 |
| 9  | 1034.44256     | 517.72492       | 345.48570       | D        | 2467.27588     | 1234.14158      | 823.09681       | 22 |
| 10 | 1165.48306     | 583.24517       | 389.16587       | M        | 2352.24893     | 1176.62810      | 784.75449       | 21 |
| 11 | 1268.49225     | 634.74976       | 423.50227       | C        | 2221.20843     | 1111.10785      | 741.07433       | 20 |
| 12 | 1381.57632     | 691.29180       | 461.19696       | L        | 2118.19924     | 1059.60326      | 706.73793       | 19 |
| 13 | 1518.63523     | 759.82125       | 506.88326       | H        | 2005.11517     | 1003.06122      | 669.04324       | 18 |
| 14 | 1589.67235     | 795.33981       | 530.56230       | A        | 1868.05626     | 934.53177       | 623.35694       | 17 |
| 15 | 1717.73093     | 859.36910       | 573.24849       | Q        | 1797.01914     | 899.01321       | 599.67790       | 16 |
| 16 | 1774.75240     | 887.87984       | 592.25565       | G        | 1668.96056     | 834.98392       | 556.99170       | 15 |
| 17 | 1873.82082     | 937.41405       | 625.27846       | Y        | 1611.93909     | 806.47318       | 537.98455       | 14 |
| 18 | 1944.85794     | 972.93261       | 648.95750       | A        | 1512.87067     | 756.93897       | 504.96174       | 13 |
| 19 | 2075.89844     | 1038.45286      | 692.63766       | M        | 1441.83355     | 721.42041       | 481.28270       | 12 |
| 20 | 2188.98251     | 1094.99489      | 730.33235       | L        | 1310.79305     | 655.90016       | 437.60253       | 11 |
| 21 | 2286.03528     | 1143.52128      | 762.68328       | P        | 1197.70898     | 599.35813       | 399.90784       | 10 |
| 22 | 2387.08296     | 1194.04512      | 796.36584       | T        | 1100.65621     | 550.83174       | 367.55692       | 9  |
| 23 | 2500.16703     | 1250.58715      | 834.06053       | L        | 999.60853      | 500.30790       | 333.87436       | 8  |
| 24 | 2613.25110     | 1307.12919      | 871.75522       | L        | 886.52446      | 443.76587       | 296.17967       | 7  |
| 25 | 2712.31952     | 1356.66340      | 904.77802       | Y        | 773.44039      | 387.22383       | 258.48498       | 6  |
| 26 | 2841.36212     | 1421.18470      | 947.79222       | E        | 674.37197      | 337.68962       | 225.46217       | 5  |
| 27 | 3011.46766     | 1506.23747      | 1004.49407      | K-Acetyl | 545.32937      | 273.16832       | 182.44797       | 4  |
| 28 | 3126.49461     | 1563.75094      | 1042.83639      | D        | 375.22383      | 188.11555       | 125.74613       | 3  |
| 29 | 3239.57868     | 1620.29298      | 1080.53108      | L        | 260.19688      | 130.60208       | 87.40381        | 2  |
| 30 |                |                 |                 | K        | 147.11281      | 74.06004        | 49.70912        | 1  |

Extracted from: Z:\712AB\SK17-S (Ac)\Chichi-Abaumanni-SK17-R-Acetyl\_DrWu\_20140703.raw #30175 RT: 83.37  
 ITMS, CID@35.00, z=+3, Mono m/z=1129.22778 Da, MH+=3385.66880 Da, Match Tol.=0.6 Da

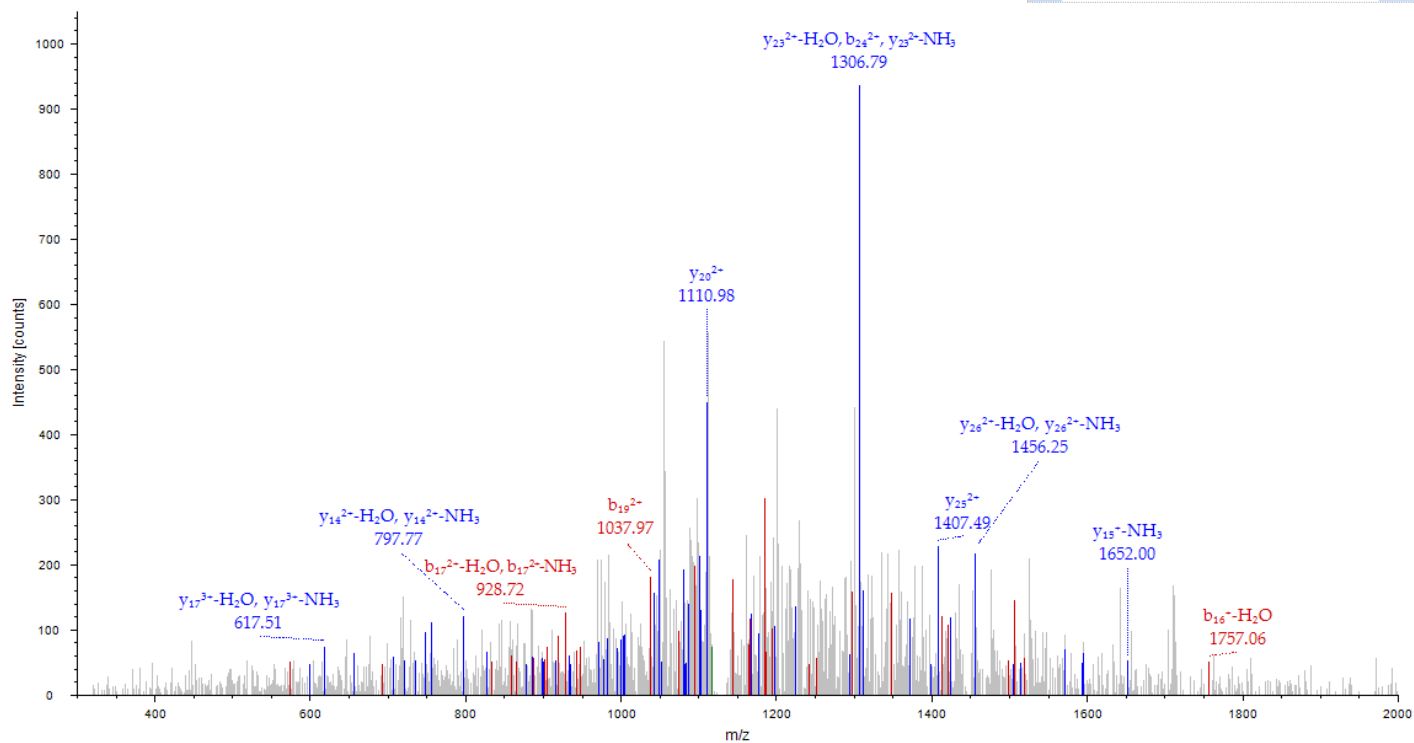

peg.1263 25699

| #1 | b <sup>+</sup> | b <sup>2+</sup> | b <sup>3+</sup> | Seq.        | y <sup>+</sup> | y <sup>2+</sup> | y <sup>3+</sup> | #2 |
|----|----------------|-----------------|-----------------|-------------|----------------|-----------------|-----------------|----|
| 1  | 171.07642      | 86.04185        | 57.69699        | Q-Acetyl    |                |                 |                 | 26 |
| 2  | 242.11354      | 121.56041       | 81.37603        | A           | 2887.53223     | 1444.26975      | 963.18226       | 25 |
| 3  | 341.18196      | 171.09462       | 114.39884       | V           | 2816.49511     | 1408.75119      | 939.50322       | 24 |
| 4  | 469.24054      | 235.12391       | 157.08503       | Q           | 2717.42669     | 1359.21698      | 906.48041       | 23 |
| 5  | 598.28314      | 299.64521       | 200.09923       | E           | 2589.36811     | 1295.18769      | 863.79422       | 22 |
| 6  | 701.29233      | 351.14980       | 234.43563       | C           | 2460.32551     | 1230.66639      | 820.78002       | 21 |
| 7  | 814.37640      | 407.69184       | 272.13032       | L           | 2357.31632     | 1179.16180      | 786.44362       | 20 |
| 8  | 961.41182      | 481.20955       | 321.14212       | M-Oxidation | 2244.23225     | 1122.61976      | 748.74893       | 19 |
| 9  | 1018.43329     | 509.72028       | 340.14928       | G           | 2097.19684     | 1049.10206      | 699.73713       | 18 |
| 10 | 1146.49187     | 573.74957       | 382.83547       | Q           | 2040.17537     | 1020.59132      | 680.72997       | 17 |
| 11 | 1259.57594     | 630.29161       | 420.53016       | L           | 1912.11679     | 956.56203       | 638.04378       | 16 |
| 12 | 1387.63452     | 694.32090       | 463.21636       | Q           | 1799.03272     | 900.02000       | 600.34909       | 15 |
| 13 | 1524.69343     | 762.85035       | 508.90266       | H           | 1670.97414     | 835.99071       | 557.66290       | 14 |
| 14 | 1671.76185     | 836.38456       | 557.92547       | F           | 1533.91523     | 767.46125       | 511.97659       | 13 |
| 15 | 1758.79388     | 879.90058       | 586.93614       | S           | 1386.84681     | 693.92704       | 462.95379       | 12 |
| 16 | 1871.87795     | 936.44261       | 624.63083       | L           | 1299.81478     | 650.41103       | 433.94311       | 11 |
| 17 | 1970.94637     | 985.97682       | 657.65364       | V           | 1186.73071     | 593.86899       | 396.24842       | 10 |
| 18 | 2084.03044     | 1042.51886      | 695.34833       | L           | 1087.66229     | 544.33478       | 363.22561       | 9  |
| 19 | 2254.13597     | 1127.57162      | 752.05017       | K-Acetyl    | 974.57822      | 487.79275       | 325.53092       | 8  |
| 20 | 2351.18874     | 1176.09801      | 784.40110       | P           | 804.47268      | 402.73998       | 268.82908       | 7  |
| 21 | 2422.22586     | 1211.61657      | 808.08014       | A           | 707.41991      | 354.21359       | 236.47815       | 6  |
| 22 | 2585.28918     | 1293.14823      | 862.43458       | V           | 636.38279      | 318.69503       | 212.79911       | 5  |
| 23 | 2642.31065     | 1321.65896      | 881.44173       | G           | 473.31947      | 237.16337       | 158.44467       | 4  |
| 24 | 2770.40562     | 1385.70645      | 924.14006       | K           | 416.29800      | 208.65264       | 139.43752       | 3  |
| 25 | 2883.48969     | 1442.24848      | 961.83475       | L           | 288.20303      | 144.60515       | 96.73919        | 2  |
| 26 |                |                 |                 | R           | 175.11896      | 88.06312        | 59.04450        | 1  |

Extracted from: Z:\V12\AB\SK17-S (Ac)\Chichi-Abaumanni-SK17-S-Acetyl\_DrWu\_20140512.raw #25699 RT: 77.64  
 ITMS, CID@35.00, z=+3, Mono m/z=1019.86542 Da, MH+=3057.58170 Da, Match Tol.=0.6 Da

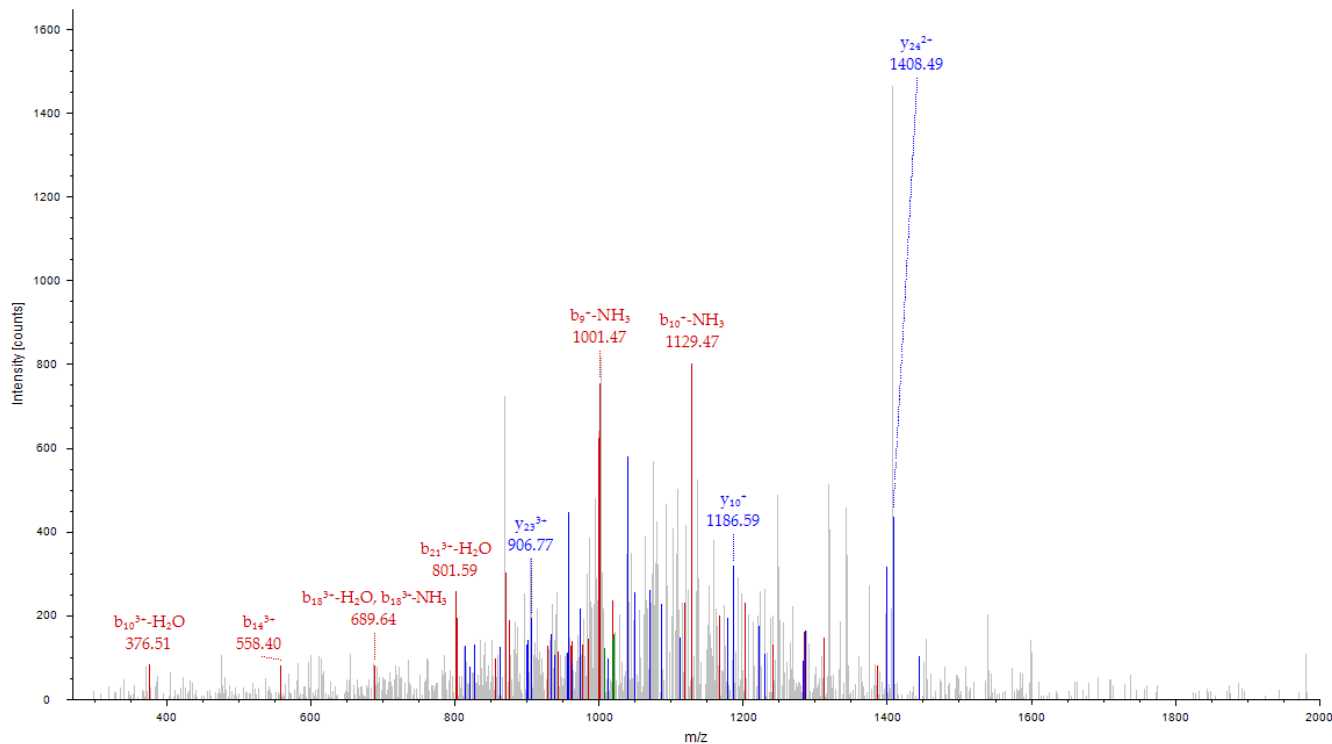



peg.1286 27953

| #1 | b <sup>+</sup> | b <sup>2+</sup> | b <sup>3+</sup> | Seq.        | y <sup>-</sup> | y <sup>2-</sup> | y <sup>3-</sup> | #2 |
|----|----------------|-----------------|-----------------|-------------|----------------|-----------------|-----------------|----|
| 1  | 148.04269      | 74.52498        | 50.01908        | M-Oxidation |                |                 |                 | 35 |
| 2  | 249.09037      | 125.04882       | 83.70164        | T           | 3812.87946     | 1906.94337      | 1271.63134      | 34 |
| 3  | 348.15879      | 174.58303       | 116.72445       | V           | 3711.83178     | 1856.41953      | 1237.94878      | 33 |
| 4  | 477.20139      | 239.10433       | 159.73865       | E           | 3612.76336     | 1806.88532      | 1204.92597      | 32 |
| 5  | 606.24399      | 303.62563       | 202.75285       | E           | 3483.72076     | 1742.36402      | 1161.91177      | 31 |
| 6  | 753.31241      | 377.15984       | 251.77565       | F           | 3354.67816     | 1677.84272      | 1118.89757      | 30 |
| 7  | 850.36518      | 425.68623       | 284.12658       | P           | 3207.60974     | 1604.30851      | 1069.87476      | 29 |
| 8  | 964.40811      | 482.70769       | 322.14089       | N           | 3110.55697     | 1555.78212      | 1037.52384      | 28 |
| 9  | 1077.49218     | 539.24973       | 359.83558       | I           | 2996.51404     | 1498.76066      | 999.50953       | 27 |
| 10 | 1192.51913     | 596.76320       | 398.17789       | D           | 2883.42997     | 1442.21862      | 961.81484       | 26 |
| 11 | 1339.58755     | 670.29741       | 447.20070       | F           | 2768.40302     | 1384.70515      | 923.47252       | 25 |
| 12 | 1436.64032     | 718.82380       | 479.55162       | P           | 2621.33460     | 1311.17094      | 874.44972       | 24 |
| 13 | 1583.70874     | 792.35801       | 528.57443       | F           | 2524.28183     | 1262.64455      | 842.09879       | 23 |
| 14 | 1682.77716     | 841.89222       | 561.59724       | V           | 2377.21341     | 1189.11034      | 793.07599       | 22 |
| 15 | 1781.84558     | 891.42643       | 594.62004       | V           | 2278.14499     | 1139.57613      | 760.05318       | 21 |
| 16 | 1880.91400     | 940.96064       | 627.64285       | V           | 2179.07657     | 1090.04192      | 727.03037       | 20 |
| 17 | 1981.96168     | 991.48448       | 661.32541       | T           | 2080.00815     | 1040.50771      | 694.00757       | 19 |
| 18 | 2083.00936     | 1042.00832      | 695.00797       | T           | 1978.96047     | 989.98387       | 660.32501       | 18 |
| 19 | 2211.06794     | 1106.03761      | 737.69416       | Q           | 1877.91279     | 939.46003       | 626.64245       | 17 |
| 20 | 2374.13126     | 1187.56927      | 792.04860       | Y           | 1749.85421     | 875.43074       | 583.95625       | 16 |
| 21 | 2445.16838     | 1223.08783      | 815.72764       | A           | 1586.79089     | 793.89908       | 529.60181       | 15 |
| 22 | 2502.18985     | 1251.59856      | 834.73480       | G           | 1515.75377     | 758.38052       | 505.92277       | 14 |
| 23 | 2573.22697     | 1287.11712      | 858.41384       | A           | 1458.73230     | 729.86979       | 486.91562       | 13 |
| 24 | 2660.25900     | 1330.63314      | 887.42452       | S           | 1387.69518     | 694.35123       | 463.23658       | 12 |
| 25 | 2757.31177     | 1379.15952      | 919.77544       | P           | 1300.66315     | 650.83521       | 434.22590       | 11 |
| 26 | 2886.35437     | 1443.68082      | 962.78964       | E           | 1203.61038     | 602.30883       | 401.87498       | 10 |
| 27 | 2957.39149     | 1479.19938      | 986.46868       | A           | 1074.56778     | 537.78753       | 358.86078       | 9  |
| 28 | 3056.45991     | 1528.73359      | 1019.49149      | V           | 1003.53066     | 502.26897       | 335.18174       | 8  |
| 29 | 3185.50251     | 1593.25489      | 1062.50569      | E           | 904.46224      | 452.73476       | 302.15893       | 7  |
| 30 | 3272.53454     | 1636.77091      | 1091.51636      | S           | 775.41964      | 388.21346       | 259.14473       | 6  |
| 31 | 3387.56149     | 1694.28438      | 1129.85868      | D           | 688.38761      | 344.69744       | 230.13405       | 5  |
| 32 | 3500.64556     | 1750.82642      | 1167.55337      | I           | 573.36066      | 287.18397       | 191.79174       | 4  |
| 33 | 3601.69324     | 1801.35026      | 1201.23593      | T           | 460.27659      | 230.64193       | 154.09705       | 3  |
| 34 | 3771.79878     | 1886.40303      | 1257.93778      | K-Acetyl    | 359.22891      | 180.11809       | 120.41449       | 2  |
| 35 |                |                 |                 | K-Acetyl    | 189.12338      | 95.06533        | 63.71264        | 1  |

Extracted from: Z:\712AB\SK17-S (Ac)\Chichi-Abaumanni-SK17-R-Acetyl\_DrWu\_20140512.raw #27953 RT: 83.41  
 ITMS, CID@35.00, z=+3, Mono m/z=1320.64771 Da, MH+=3959.92856 Da, Match Tol=0.6 Da

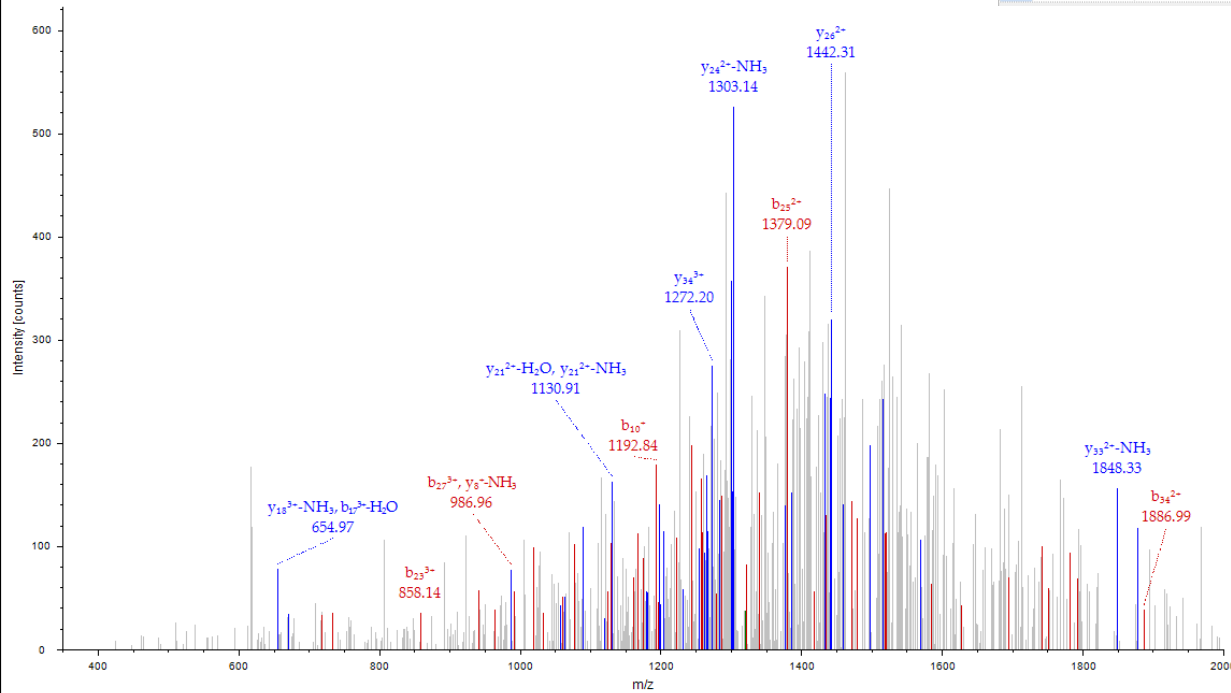

peg.13 16218

| #1 | b <sup>+</sup> | b <sup>2+</sup> | Seq.     | y <sup>+</sup> | y <sup>2+</sup> | #2 |
|----|----------------|-----------------|----------|----------------|-----------------|----|
| 1  | 58.02875       | 29.51801        | G        |                |                 | 22 |
| 2  | 115.05022      | 58.02875        | G        | 1848.90224     | 924.95476       | 21 |
| 3  | 243.14519      | 122.07623       | K        | 1791.88077     | 896.44402       | 20 |
| 4  | 300.16666      | 150.58697       | G        | 1663.78580     | 832.39654       | 19 |
| 5  | 401.21434      | 201.11081       | T        | 1606.76433     | 803.88580       | 18 |
| 6  | 458.23581      | 229.62154       | G        | 1505.71665     | 753.36196       | 17 |
| 7  | 515.25728      | 258.13228       | G        | 1448.69518     | 724.85123       | 16 |
| 8  | 572.27875      | 286.64301       | G        | 1391.67371     | 696.34049       | 15 |
| 9  | 719.34717      | 360.17722       | F        | 1334.65224     | 667.82976       | 14 |
| 10 | 847.40575      | 424.20651       | Q        | 1187.58382     | 594.29555       | 13 |
| 11 | 904.42722      | 452.71725       | G        | 1059.52524     | 530.26626       | 12 |
| 12 | 961.44869      | 481.22798       | G        | 1002.50377     | 501.75552       | 11 |
| 13 | 1018.47016     | 509.73872       | G        | 945.48230      | 473.24479       | 10 |
| 14 | 1188.57569     | 594.79148       | K-Acetyl | 888.46083      | 444.73405       | 9  |
| 15 | 1245.59716     | 623.30222       | G        | 718.35529      | 359.68128       | 8  |
| 16 | 1302.61863     | 651.81295       | G        | 661.33382      | 331.17055       | 7  |
| 17 | 1373.65575     | 687.33151       | A        | 604.31235      | 302.65981       | 6  |
| 18 | 1470.70852     | 735.85790       | P        | 533.27523      | 267.14125       | 5  |
| 19 | 1571.75620     | 786.38174       | T        | 436.22246      | 218.61487       | 4  |
| 20 | 1628.77767     | 814.89247       | G        | 335.17478      | 168.09103       | 3  |
| 21 | 1759.81817     | 880.41272       | M        | 278.15331      | 139.58029       | 2  |
| 22 |                |                 | K        | 147.11281      | 74.06004        | 1  |

Extracted from: Z:\712AB\SK17-S (Ac)Chichi-Abaumannii-SK17-R-Acetyl\_DrWu\_20140703.raw #16218 RT: 46.85  
 ITMS, CID@35.00, z=+2, Mono m/z=953.45776 Da, MH+=1905.90825 Da, Match Tol.=0.6 Da

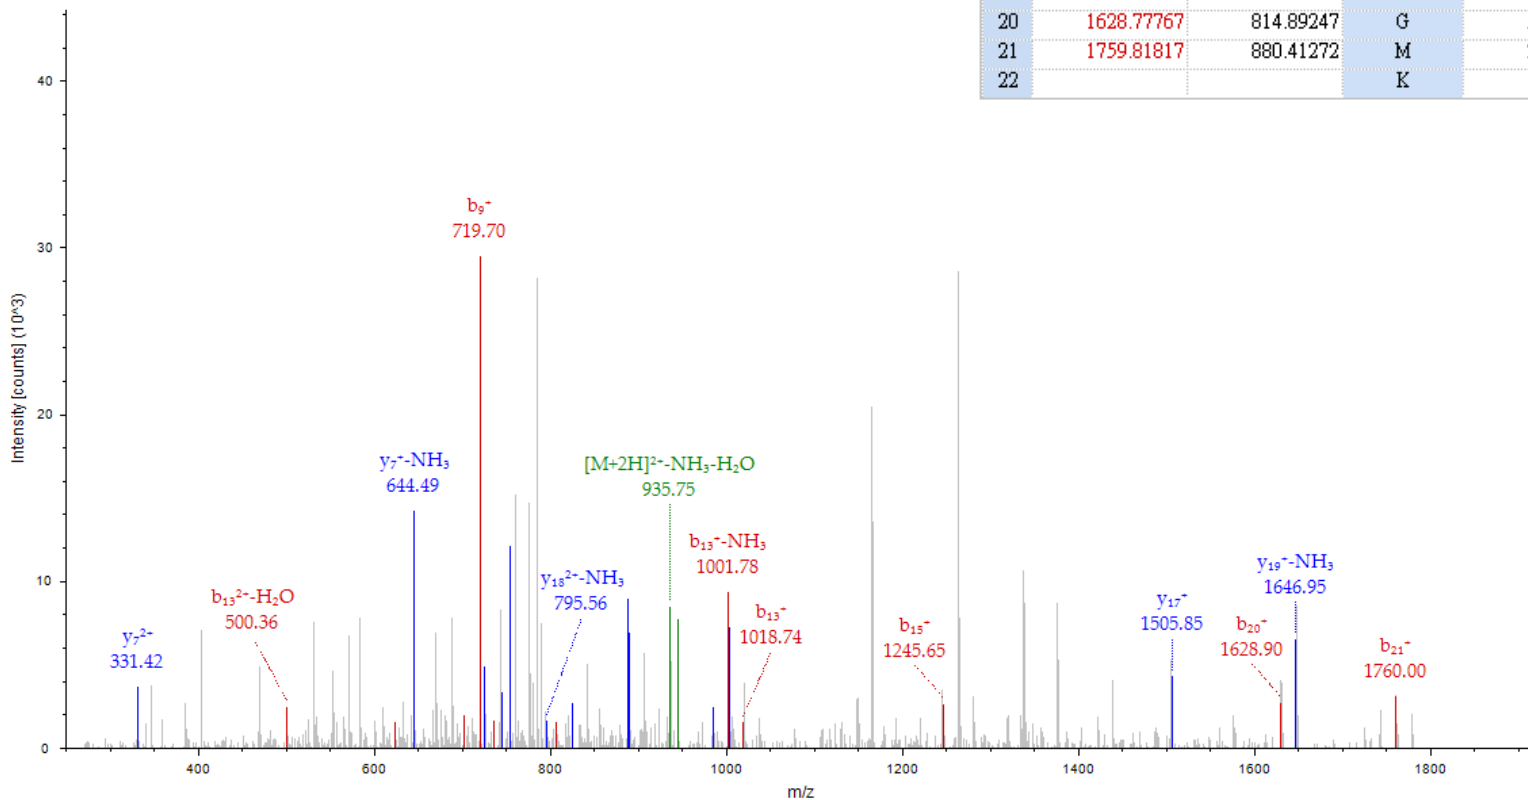

peg.13 14419

| #1 | b <sup>+</sup> | b <sup>2+</sup> | Seq.     | y <sup>+</sup> | y <sup>2+</sup> | #2 |
|----|----------------|-----------------|----------|----------------|-----------------|----|
| 1  | 58.02875       | 29.51801        | G        |                |                 | 22 |
| 2  | 115.05022      | 58.02875        | G        | 1848.90224     | 924.95476       | 21 |
| 3  | 243.14519      | 122.07623       | K        | 1791.88077     | 896.44402       | 20 |
| 4  | 300.16666      | 150.58697       | G        | 1663.78580     | 832.39654       | 19 |
| 5  | 401.21434      | 201.11081       | T        | 1606.76433     | 803.88580       | 18 |
| 6  | 458.23581      | 229.62154       | G        | 1505.71665     | 753.36196       | 17 |
| 7  | 515.25728      | 258.13228       | G        | 1448.69518     | 724.85123       | 16 |
| 8  | 572.27875      | 286.64301       | G        | 1391.67371     | 696.34049       | 15 |
| 9  | 719.34717      | 360.17722       | F        | 1334.65224     | 667.82976       | 14 |
| 10 | 847.40575      | 424.20651       | Q        | 1187.58382     | 594.29555       | 13 |
| 11 | 904.42722      | 452.71725       | G        | 1059.52524     | 530.26626       | 12 |
| 12 | 961.44869      | 481.22798       | G        | 1002.50377     | 501.75552       | 11 |
| 13 | 1018.47016     | 509.73872       | G        | 945.48230      | 473.24479       | 10 |
| 14 | 1188.57569     | 594.79148       | K-Acetyl | 888.46083      | 444.73405       | 9  |
| 15 | 1245.59716     | 623.30222       | G        | 718.35529      | 359.68128       | 8  |
| 16 | 1302.61863     | 651.81295       | G        | 661.33382      | 331.17055       | 7  |
| 17 | 1373.65575     | 687.33151       | A        | 604.31235      | 302.65981       | 6  |
| 18 | 1470.70852     | 735.85790       | P        | 533.27523      | 267.14125       | 5  |
| 19 | 1571.75620     | 786.38174       | T        | 436.22246      | 218.61487       | 4  |
| 20 | 1628.77767     | 814.89247       | G        | 335.17478      | 168.09103       | 3  |
| 21 | 1759.81817     | 880.41272       | M        | 278.15331      | 139.58029       | 2  |
| 22 |                |                 | K        | 147.11281      | 74.06004        | 1  |

Extracted from: Z:\712AB\SK17-S (Ac)\Chichi-Abaumannii-SK17-S-Acetyl\_DrWu\_20140512.raw #14419 RT: 46.08  
 ITMS, CID@35.00, z=+2, Mono m/z=953.45630 Da, MH+=1905.90532 Da, Match Tol.=0.6 Da

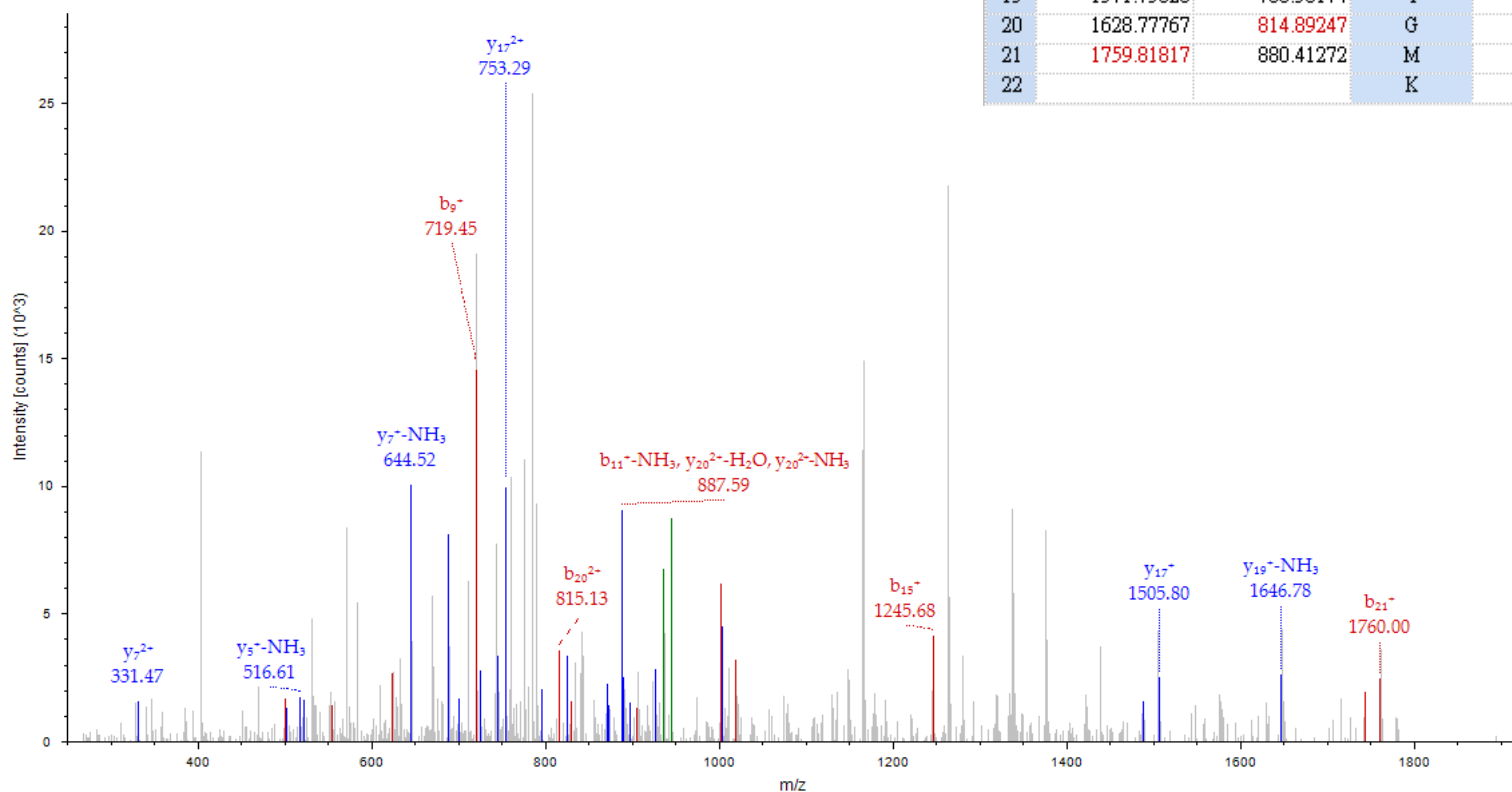

# peg.1307 9072

| #1 | b <sup>+</sup> | b <sup>2+</sup> | b <sup>3+</sup> | Seq.     | y <sup>+</sup> | y <sup>2+</sup> | y <sup>3+</sup> | #2 |
|----|----------------|-----------------|-----------------|----------|----------------|-----------------|-----------------|----|
| 1  | 114.09135      | 57.54931        | 38.70197        | L        |                |                 |                 | 17 |
| 2  | 171.11282      | 86.06005        | 57.70912        | G        | 1660.81779     | 830.91253       | 554.27745       | 16 |
| 3  | 284.19689      | 142.60208       | 95.40381        | L        | 1603.79632     | 802.40180       | 535.27029       | 15 |
| 4  | 399.22384      | 200.11556       | 133.74613       | D        | 1490.71225     | 745.85976       | 497.57560       | 14 |
| 5  | 546.29226      | 273.64977       | 182.76894       | F        | 1375.68530     | 688.34629       | 459.23328       | 13 |
| 6  | 660.33519      | 330.67123       | 220.78325       | N        | 1228.61688     | 614.81208       | 410.21048       | 12 |
| 7  | 761.38287      | 381.19507       | 254.46581       | T        | 1114.57395     | 557.79061       | 372.19617       | 11 |
| 8  | 858.43564      | 429.72146       | 286.81673       | P        | 1013.52627     | 507.26677       | 338.51361       | 10 |
| 9  | 957.50406      | 479.25567       | 319.83954       | V        | 916.47350      | 458.74039       | 306.16268       | 9  |
| 10 | 1014.52553     | 507.76640       | 338.84669       | G        | 817.40508      | 409.20618       | 273.13988       | 8  |
| 11 | 1129.55248     | 565.27988       | 377.18901       | D        | 760.38361      | 380.69544       | 254.13272       | 7  |
| 12 | 1244.57943     | 622.79335       | 415.53133       | D        | 645.35666      | 323.18197       | 215.79040       | 6  |
| 13 | 1414.68496     | 707.84612       | 472.23317       | K-Acetyl | 530.32971      | 265.66849       | 177.44809       | 5  |
| 14 | 1513.75338     | 757.38033       | 505.25598       | V        | 360.22417      | 180.61572       | 120.74624       | 4  |
| 15 | 1570.77485     | 785.89106       | 524.26313       | G        | 261.15575      | 131.08151       | 87.72343        | 3  |
| 16 | 1627.79632     | 814.40180       | 543.27029       | G        | 204.13428      | 102.57078       | 68.71628        | 2  |
| 17 |                |                 |                 | K        | 147.11281      | 74.06004        | 49.70912        | 1  |

Extracted from: Z:\712AB\SK17-S (Ac)\Chichi-Abaumannii-SK17-R-Acetyl\_DrWu\_20140703.raw #9072 RT: 29.95  
 ITMS, CID@35.00, z=+3, Mono m/z=591.97070 Da, MH+=1773.89756 Da, Match Tol.=0.6 Da

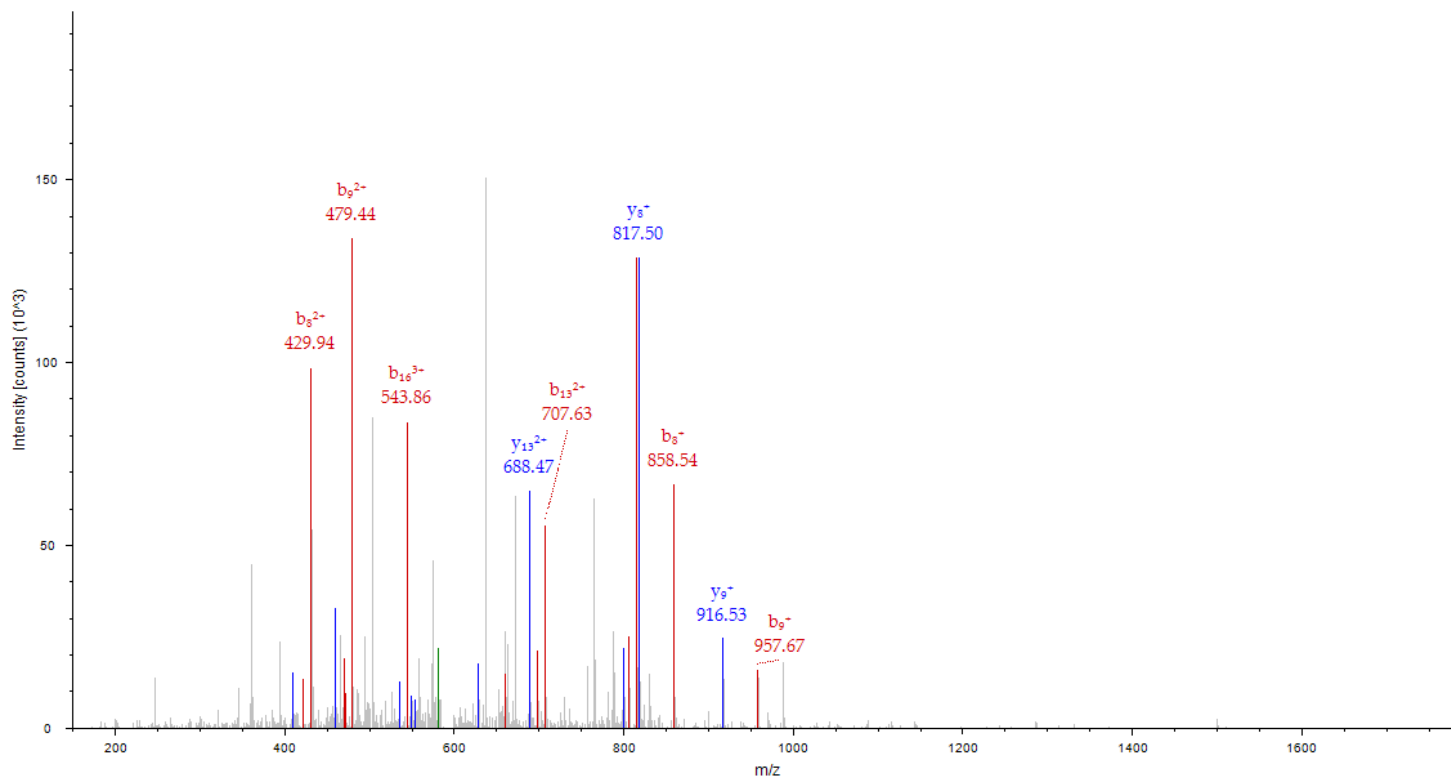

peg.1307 9541

| #1 | b <sup>+</sup> | b <sup>2+</sup> | b <sup>3+</sup> | Seq.     | y <sup>+</sup> | y <sup>2+</sup> | y <sup>3+</sup> | #2 |
|----|----------------|-----------------|-----------------|----------|----------------|-----------------|-----------------|----|
| 1  | 114.09135      | 57.54931        | 38.70197        | L        |                |                 |                 | 17 |
| 2  | 171.11282      | 86.06005        | 57.70912        | G        | 1660.81779     | 830.91253       | 554.27745       | 16 |
| 3  | 284.19689      | 142.60208       | 95.40381        | L        | 1603.79632     | 802.40180       | 535.27029       | 15 |
| 4  | 399.22384      | 200.11556       | 133.74613       | D        | 1490.71225     | 745.85976       | 497.57560       | 14 |
| 5  | 546.29226      | 273.64977       | 182.76894       | F        | 1375.68530     | 688.34629       | 459.23328       | 13 |
| 6  | 660.33519      | 330.67123       | 220.78325       | N        | 1228.61688     | 614.81208       | 410.21048       | 12 |
| 7  | 761.38287      | 381.19507       | 254.46581       | T        | 1114.57395     | 557.79061       | 372.19617       | 11 |
| 8  | 858.43564      | 429.72146       | 286.81673       | P        | 1013.52627     | 507.26677       | 338.51361       | 10 |
| 9  | 957.50406      | 479.25567       | 319.83954       | V        | 916.47350      | 458.74039       | 306.16268       | 9  |
| 10 | 1014.52553     | 507.76640       | 338.84669       | G        | 817.40508      | 409.20618       | 273.13988       | 8  |
| 11 | 1129.55248     | 565.27988       | 377.18901       | D        | 760.38361      | 380.69544       | 254.13272       | 7  |
| 12 | 1244.57943     | 622.79335       | 415.53133       | D        | 645.35666      | 323.18197       | 215.79040       | 6  |
| 13 | 1414.68496     | 707.84612       | 472.23317       | K-Acetyl | 530.32971      | 265.66849       | 177.44809       | 5  |
| 14 | 1513.75338     | 757.38033       | 505.25598       | V        | 360.22417      | 180.61572       | 120.74624       | 4  |
| 15 | 1570.77485     | 785.89106       | 524.26313       | G        | 261.15575      | 131.08151       | 87.72343        | 3  |
| 16 | 1627.79632     | 814.40180       | 543.27029       | G        | 204.13428      | 102.57078       | 68.71628        | 2  |
| 17 |                |                 |                 | K        | 147.11281      | 74.06004        | 49.70912        | 1  |

Extracted from: Z:\712ABISK17-S (Ac)IChichi-Abaumannii-SK17-S-Acetyl\_DrWu\_20140703.raw #9541 RT: 30.22  
 ITMS, CID@35.00, z=+3, Mono m/z=591.97137 Da, MH+=1773.89957 Da, Match Tol.=0.6 Da

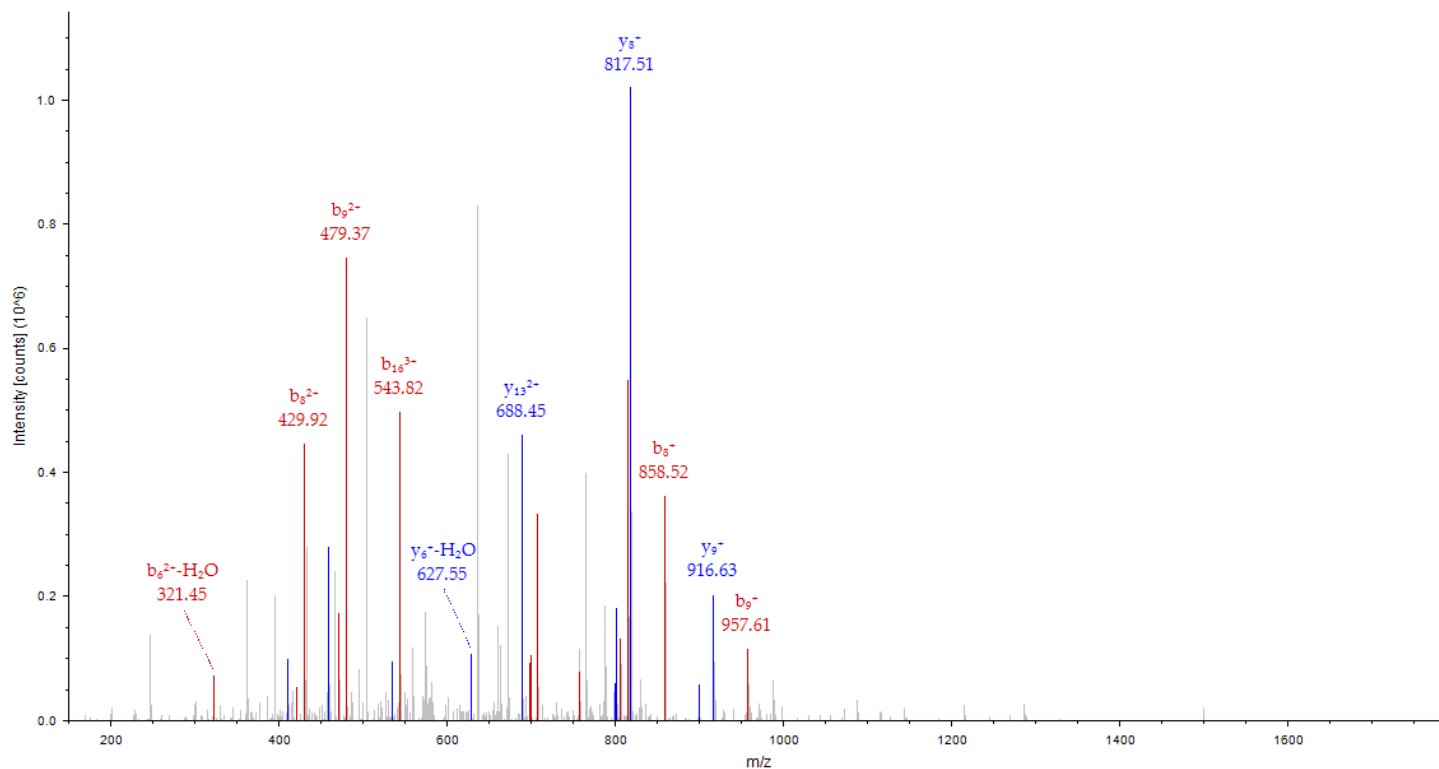

peg.1324 25617

| #1 | b <sup>+</sup> | b <sup>2+</sup> | b <sup>3+</sup> | Seq.     | y <sup>+</sup> | y <sup>2+</sup> | y <sup>3+</sup> | #2 |
|----|----------------|-----------------|-----------------|----------|----------------|-----------------|-----------------|----|
| 1  | 132.04778      | 66.52753        | 44.68744        | M        |                |                 |                 | 19 |
| 2  | 245.13185      | 123.06956       | 82.38213        | L        | 2079.03157     | 1040.01942      | 693.68204       | 18 |
| 3  | 360.15880      | 180.58304       | 120.72445       | D        | 1965.94750     | 983.47739       | 655.98735       | 17 |
| 4  | 489.20140      | 245.10434       | 163.73865       | E        | 1850.92055     | 925.96391       | 617.64503       | 16 |
| 5  | 602.28547      | 301.64637       | 201.43334       | I        | 1721.87795     | 861.44261       | 574.63083       | 15 |
| 6  | 659.30694      | 330.15711       | 220.44050       | G        | 1608.79388     | 804.90058       | 536.93614       | 14 |
| 7  | 746.33897      | 373.67312       | 249.45117       | S        | 1551.77241     | 776.38984       | 517.92899       | 13 |
| 8  | 845.40739      | 423.20733       | 282.47398       | V        | 1464.74038     | 732.87383       | 488.91831       | 12 |
| 9  | 974.44999      | 487.72863       | 325.48818       | E        | 1365.67196     | 683.33962       | 455.89550       | 11 |
| 10 | 1088.49292     | 544.75010       | 363.50249       | N        | 1236.62936     | 618.81832       | 412.88130       | 10 |
| 11 | 1187.56134     | 594.28431       | 396.52530       | V        | 1122.58643     | 561.79685       | 374.86699       | 9  |
| 12 | 1258.59846     | 629.80287       | 420.20434       | A        | 1023.51801     | 512.26264       | 341.84419       | 8  |
| 13 | 1387.64106     | 694.32417       | 463.21854       | E        | 952.48089      | 476.74408       | 318.16515       | 7  |
| 14 | 1534.70948     | 767.85838       | 512.24134       | F        | 823.43829      | 412.22278       | 275.15095       | 6  |
| 15 | 1665.74998     | 833.37863       | 555.92151       | M        | 676.36987      | 338.68857       | 226.12814       | 5  |
| 16 | 1794.79258     | 897.89993       | 598.93571       | E        | 545.32937      | 273.16832       | 182.44797       | 4  |
| 17 | 1964.89811     | 982.95269       | 655.63755       | K-Acetyl | 416.28677      | 208.64702       | 139.43377       | 3  |
| 18 | 2063.96653     | 1032.48690      | 688.66036       | V        | 246.18123      | 123.59425       | 82.73193        | 2  |
| 19 |                |                 |                 | K        | 147.11281      | 74.06004        | 49.70912        | 1  |

Extracted from: Z:\712AB\SK17-S (Ac)\Chichi-Abbaumannii-SK17-S-Acetyl\_DrWu\_20140512.raw #25617 RT: 77.39  
 ITMS, CID@35.00, z=+3, Mono m/z=737.36224 Da, MH+=2210.07218 Da, Match Tol.=0.6 Da

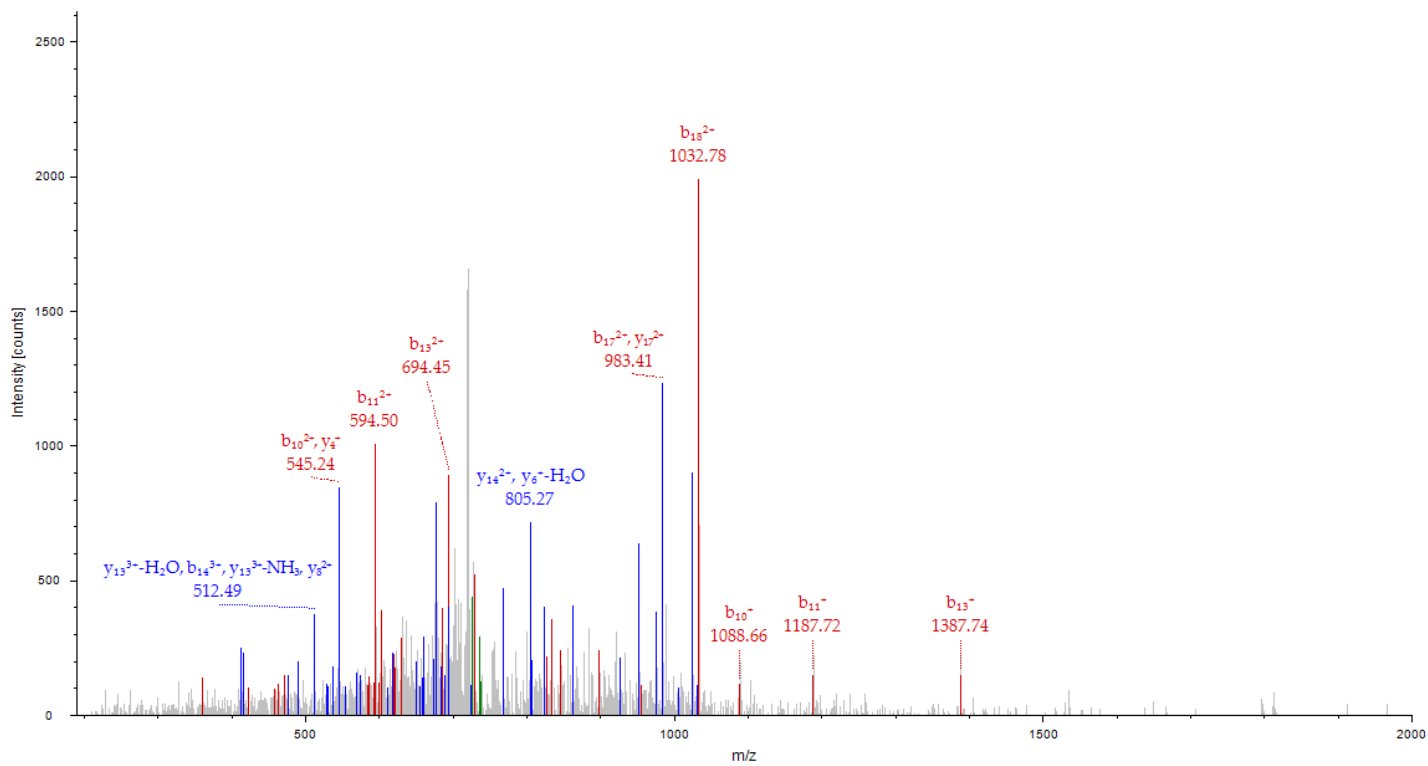



peg.1331 23320

| #1 | b <sup>+</sup> | b <sup>2+</sup> | Seq.     | y <sup>+</sup> | y <sup>2+</sup> | #2 |
|----|----------------|-----------------|----------|----------------|-----------------|----|
| 1  | 132.04778      | 66.52753        | M        |                |                 | 15 |
| 2  | 245.13185      | 123.06956       | I        | 1501.86255     | 751.43491       | 14 |
| 3  | 360.15880      | 180.58304       | D        | 1388.77848     | 694.89288       | 13 |
| 4  | 417.18027      | 209.09377       | G        | 1273.75153     | 637.37940       | 12 |
| 5  | 587.28580      | 294.14654       | K-Acetyl | 1216.73006     | 608.86867       | 11 |
| 6  | 716.32840      | 358.66784       | E        | 1046.62452     | 523.81590       | 10 |
| 7  | 787.36552      | 394.18640       | A        | 917.58192      | 459.29460       | 9  |
| 8  | 886.43394      | 443.72061       | V        | 846.54480      | 423.77604       | 8  |
| 9  | 943.45541      | 472.23134       | G        | 747.47638      | 374.24183       | 7  |
| 10 | 1090.52383     | 545.76555       | F        | 690.45491      | 345.73109       | 6  |
| 11 | 1203.60790     | 602.30759       | L        | 543.38649      | 272.19688       | 5  |
| 12 | 1302.67632     | 651.84180       | V        | 430.30242      | 215.65485       | 4  |
| 13 | 1373.71344     | 687.36036       | A        | 331.23400      | 166.12064       | 3  |
| 14 | 1486.79751     | 743.90239       | I        | 260.19688      | 130.60208       | 2  |
| 15 |                |                 | K        | 147.11281      | 74.06004        | 1  |

Extracted from: Z:\712AB\SK17-S (Ac)\Chichi-Abaumannii-SK17-S-Acetyl\_DrWu\_20140512.raw #23320 RT: 70.38  
 ITMS, CID@35.00, z=+2, Mono m/z=816.95282 Da, MH+=1632.89836 Da, Match Tol.=0.6 Da

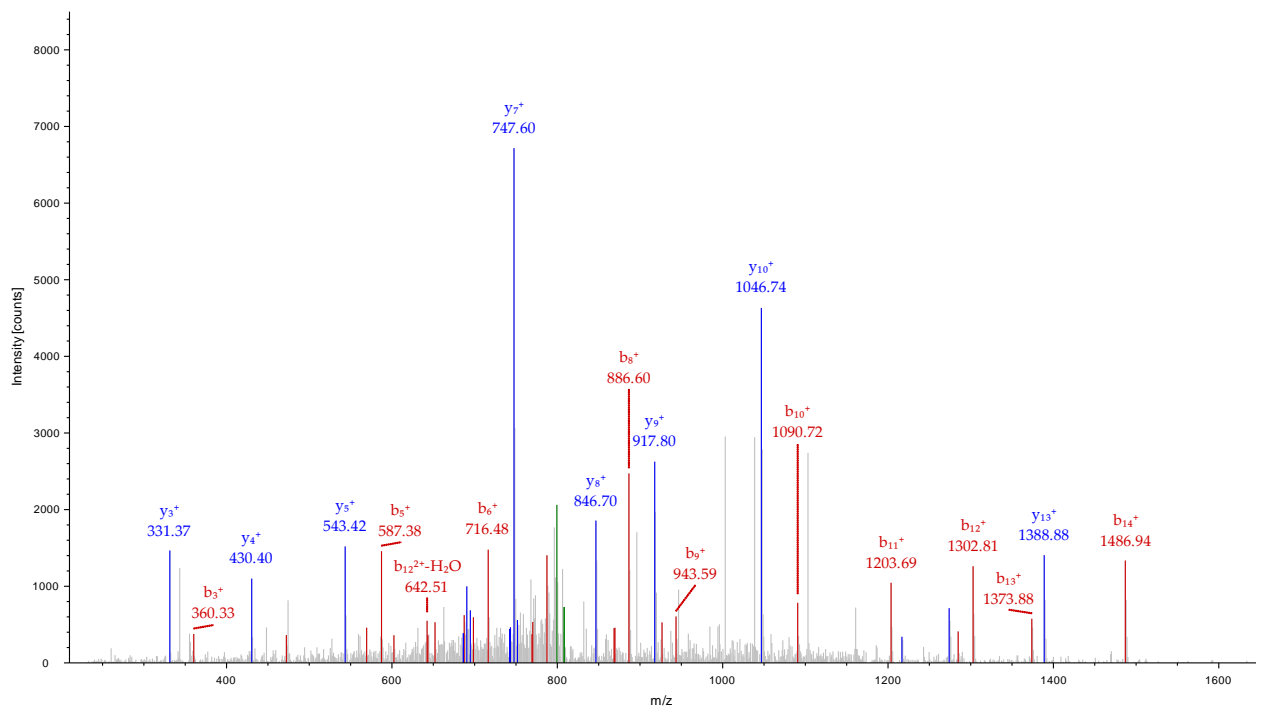

peg.1331 4726

| #1 | b <sup>+</sup> | b <sup>2+</sup> | Seq.     | y <sup>+</sup> | y <sup>2+</sup> | #2 |
|----|----------------|-----------------|----------|----------------|-----------------|----|
| 1  | 129.10225      | 65.05476        | K        |                |                 | 9  |
| 2  | 257.16083      | 129.08405       | Q        | 1070.51534     | 535.76131       | 8  |
| 3  | 420.22415      | 210.61571       | Y        | 942.45676      | 471.73202       | 7  |
| 4  | 590.32968      | 295.66848       | K-Acetyl | 779.39344      | 390.20036       | 6  |
| 5  | 705.35663      | 353.18195       | D        | 609.28790      | 305.14759       | 5  |
| 6  | 776.39375      | 388.70051       | A        | 494.26095      | 247.63411       | 4  |
| 7  | 923.46217      | 462.23472       | F        | 423.22383      | 212.11555       | 3  |
| 8  | 1052.50477     | 526.75602       | E        | 276.15541      | 138.58134       | 2  |
| 9  |                |                 | K        | 147.11281      | 74.06004        | 1  |

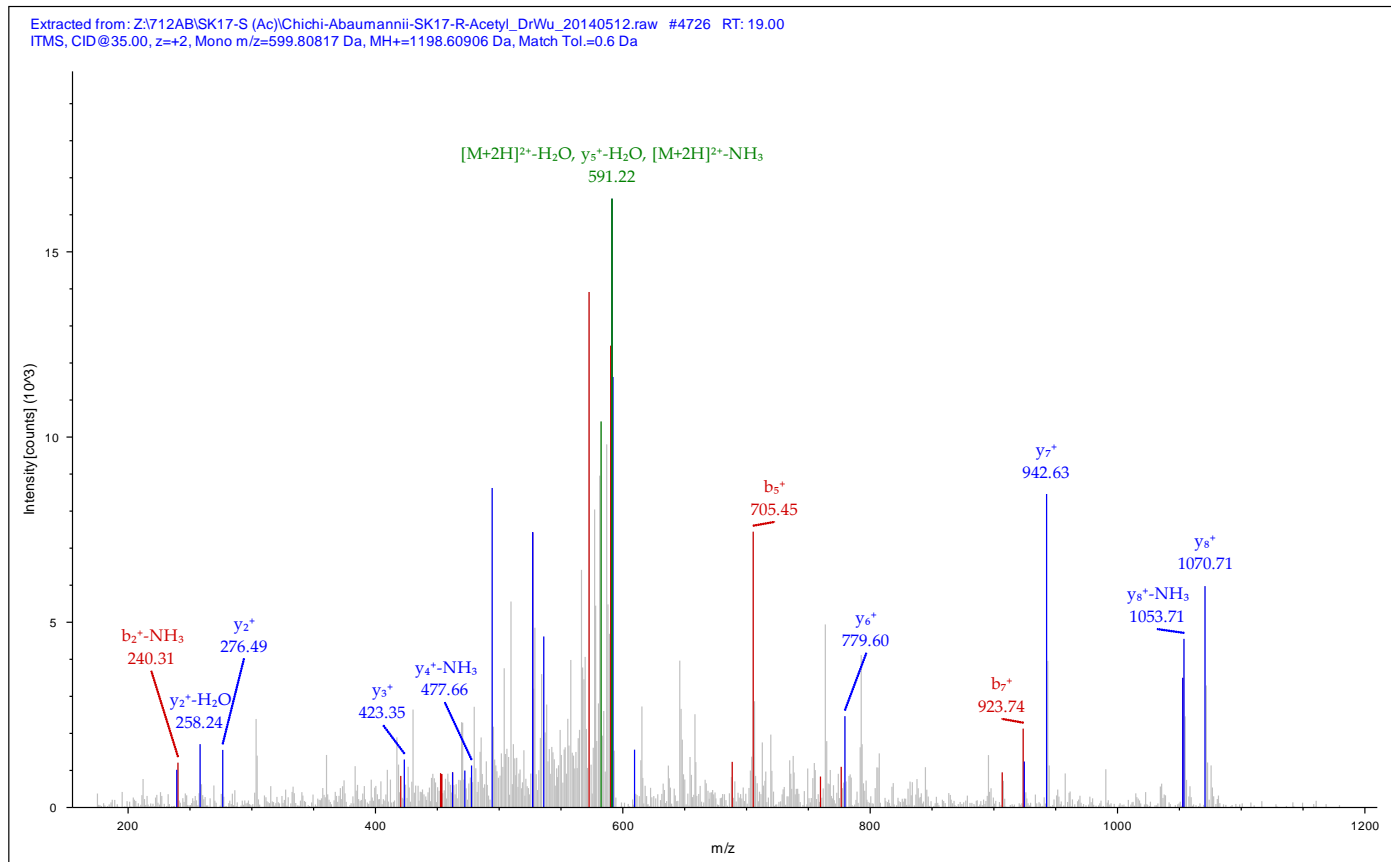

peg.1331 3652

| #1 | b <sup>+</sup> | b <sup>2+</sup> | Seq.     | y <sup>+</sup> | y <sup>2+</sup> | #2 |
|----|----------------|-----------------|----------|----------------|-----------------|----|
| 1  | 129.10225      | 65.05476        | K        |                |                 | 9  |
| 2  | 257.16083      | 129.08405       | Q        | 1070.51534     | 535.76131       | 8  |
| 3  | 420.22415      | 210.61571       | Y        | 942.45676      | 471.73202       | 7  |
| 4  | 590.32968      | 295.66848       | K-Acetyl | 779.39344      | 390.20036       | 6  |
| 5  | 705.35663      | 353.18195       | D        | 609.28790      | 305.14759       | 5  |
| 6  | 776.39375      | 388.70051       | A        | 494.26095      | 247.63411       | 4  |
| 7  | 923.46217      | 462.23472       | F        | 423.22383      | 212.11555       | 3  |
| 8  | 1052.50477     | 526.75602       | E        | 276.15541      | 138.58134       | 2  |
| 9  |                |                 | K        | 147.11281      | 74.06004        | 1  |

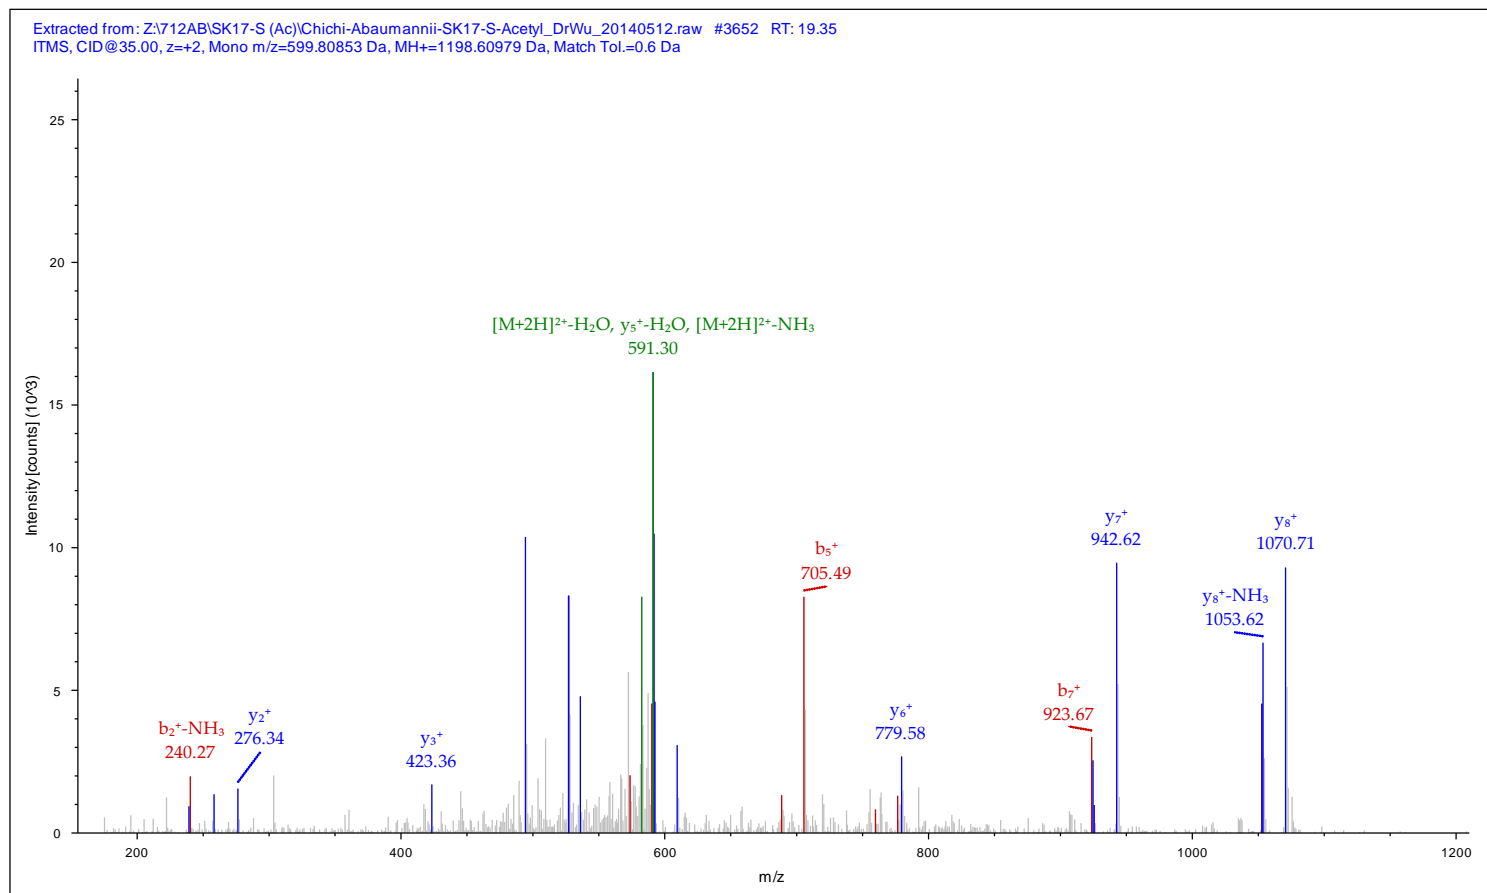

# peg.1342 29761

| #1 | b <sup>+</sup> | b <sup>2+</sup> | b <sup>3+</sup> | Seq.     | y <sup>+</sup> | y <sup>2+</sup> | y <sup>3+</sup> | #2 |
|----|----------------|-----------------|-----------------|----------|----------------|-----------------|-----------------|----|
| 1  | 148.07570      | 74.54149        | 50.03008        | F        |                |                 |                 | 31 |
| 2  | 205.09717      | 103.05222       | 69.03724        | G        | 3899.91812     | 1950.46270      | 1300.64422      | 30 |
| 3  | 318.18124      | 159.59426       | 106.73193       | L        | 3842.89665     | 1921.95196      | 1281.63707      | 29 |
| 4  | 446.23982      | 223.62355       | 149.41812       | Q        | 3729.81258     | 1865.40993      | 1243.94238      | 28 |
| 5  | 559.32389      | 280.16558       | 187.11281       | I        | 3601.75400     | 1801.38064      | 1201.25618      | 27 |
| 6  | 673.36682      | 337.18705       | 225.12712       | N        | 3488.66993     | 1744.83860      | 1163.56149      | 26 |
| 7  | 820.43524      | 410.72126       | 274.14993       | F        | 3374.62700     | 1687.81714      | 1125.54718      | 25 |
| 8  | 983.49856      | 492.25292       | 328.50437       | Y        | 3227.55858     | 1614.28293      | 1076.52438      | 24 |
| 9  | 1040.52003     | 520.76365       | 347.51153       | G        | 3064.49526     | 1532.75127      | 1022.16994      | 23 |
| 10 | 1187.58845     | 594.29786       | 396.53433       | F        | 3007.47379     | 1504.24053      | 1003.16278      | 22 |
| 11 | 1274.62048     | 637.81388       | 425.54501       | S        | 2860.40537     | 1430.70632      | 954.13997       | 21 |
| 12 | 1402.67906     | 701.84317       | 468.23120       | Q        | 2773.37334     | 1387.19031      | 925.12930       | 20 |
| 13 | 1530.73764     | 765.87246       | 510.91740       | Q        | 2645.31476     | 1323.16102      | 882.44310       | 19 |
| 14 | 1659.78024     | 830.39376       | 553.93160       | E        | 2517.25618     | 1259.13173      | 839.75691       | 18 |
| 15 | 1822.84356     | 911.92542       | 608.28604       | Y        | 2388.21358     | 1194.61043      | 796.74271       | 17 |
| 16 | 1935.92763     | 968.46745       | 645.98073       | L        | 2225.15026     | 1113.07877      | 742.38827       | 16 |
| 17 | 2064.02260     | 1032.51494      | 688.67905       | K        | 2112.06619     | 1056.53673      | 704.69358       | 15 |
| 18 | 2165.07028     | 1083.03878      | 722.36161       | T        | 1983.97122     | 992.48925       | 661.99526       | 14 |
| 19 | 2264.13870     | 1132.57299      | 755.38442       | V        | 1882.92354     | 941.96541       | 628.31270       | 13 |
| 20 | 2392.19728     | 1196.60228      | 798.07061       | Q        | 1783.85512     | 892.43120       | 595.28989       | 12 |
| 21 | 2555.26060     | 1278.13394      | 852.42505       | Y        | 1655.79654     | 828.40191       | 552.60370       | 11 |
| 22 | 2741.33992     | 1371.17360      | 914.45149       | W        | 1492.73322     | 746.87025       | 498.24926       | 10 |
| 23 | 2854.42399     | 1427.71563      | 952.14618       | L        | 1306.65390     | 653.83059       | 436.22282       | 9  |
| 24 | 2968.46692     | 1484.73710      | 990.16049       | N        | 1193.56983     | 597.28855       | 398.52813       | 8  |
| 25 | 3097.50952     | 1549.25840      | 1033.17469      | E        | 1079.52690     | 540.26709       | 360.51382       | 7  |
| 26 | 3260.57284     | 1630.79006      | 1087.52913      | Y        | 950.48430      | 475.74579       | 317.49962       | 6  |
| 27 | 3430.67837     | 1715.84282      | 1144.23097      | K-Acetyl | 787.42098      | 394.21413       | 263.14518       | 5  |
| 28 | 3616.75769     | 1808.88248      | 1206.25741      | W        | 617.31544      | 309.16136       | 206.44333       | 4  |
| 29 | 3744.81627     | 1872.91177      | 1248.94361      | Q        | 431.23612      | 216.12170       | 144.41689       | 3  |
| 30 | 3872.87485     | 1936.94106      | 1291.62980      | Q        | 303.17754      | 152.09241       | 101.73070       | 2  |
| 31 |                |                 |                 | R        | 175.11896      | 88.06312        | 59.04450        | 1  |

Extracted from: Z:\712AB\SK17-S (Ac)\Chichi-Abaumannii-SK17-S-Acetyl\_DrWu\_20140703.raw #29761 RT: 82.89  
 ITMS, CID@35.00, z=+3, Mono m/z=1349.67896 Da, MH+=4047.02231 Da, Match Tol.=0.6 Da

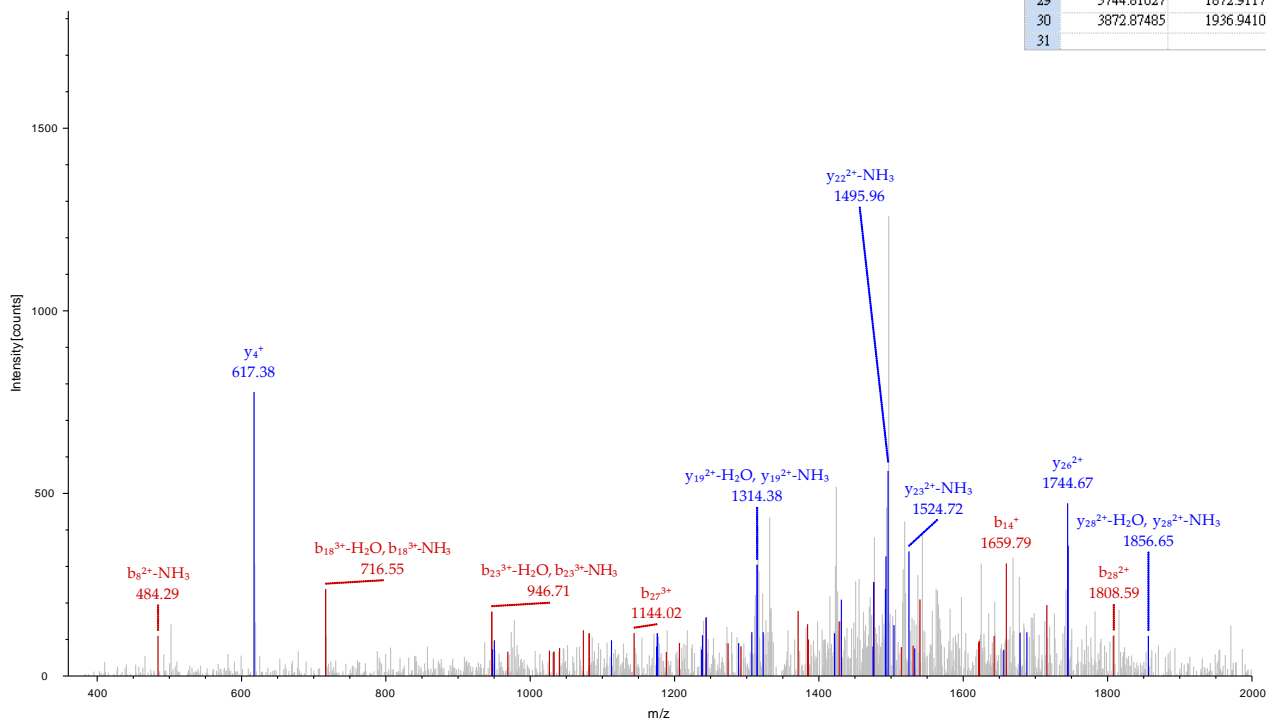

peg.1381 19691

| #1 | b <sup>+</sup> | b <sup>2+</sup> | Seq.     | y <sup>+</sup> | y <sup>2+</sup> | #2 |
|----|----------------|-----------------|----------|----------------|-----------------|----|
| 1  | 129.06586      | 65.03657        | Q        |                |                 | 17 |
| 2  | 226.11863      | 113.56295       | P        | 1709.86803     | 855.43765       | 16 |
| 3  | 297.15575      | 149.08151       | A        | 1612.81526     | 806.91127       | 15 |
| 4  | 384.18778      | 192.59753       | S        | 1541.77814     | 771.39271       | 14 |
| 5  | 531.25620      | 266.13174       | F        | 1454.74611     | 727.87669       | 13 |
| 6  | 634.26539      | 317.63633       | C        | 1307.67769     | 654.34248       | 12 |
| 7  | 691.28686      | 346.14707       | G        | 1204.66850     | 602.83789       | 11 |
| 8  | 804.37093      | 402.68910       | L        | 1147.64703     | 574.32715       | 10 |
| 9  | 905.41861      | 453.21294       | T        | 1034.56296     | 517.78512       | 9  |
| 10 | 962.44008      | 481.72368       | G        | 933.51528      | 467.26128       | 8  |
| 11 | 1075.52415     | 538.26571       | L        | 876.49381      | 438.75054       | 7  |
| 12 | 1245.62968     | 623.31848       | K-Acetyl | 763.40974      | 382.20851       | 6  |
| 13 | 1342.68245     | 671.84486       | P        | 593.30420      | 297.15574       | 5  |
| 14 | 1443.73013     | 722.36870       | T        | 496.25143      | 248.62935       | 4  |
| 15 | 1606.79345     | 803.90036       | Y        | 395.20375      | 198.10551       | 3  |
| 16 | 1663.81492     | 832.41110       | G        | 232.14043      | 116.57385       | 2  |
| 17 |                |                 | R        | 175.11896      | 88.06312        | 1  |

Extracted from: Z:\712AB\SK17-S (Ac)\Chichi-Abaumannii-SK17-S-Acetyl\_DrWu\_20140512.raw #19691 RT: 59.97  
ITMS, CID@35.00, z=+2, Mono m/z=919.45929 Da, MH+=1837.91130 Da, Match Tol.=0.6 Da

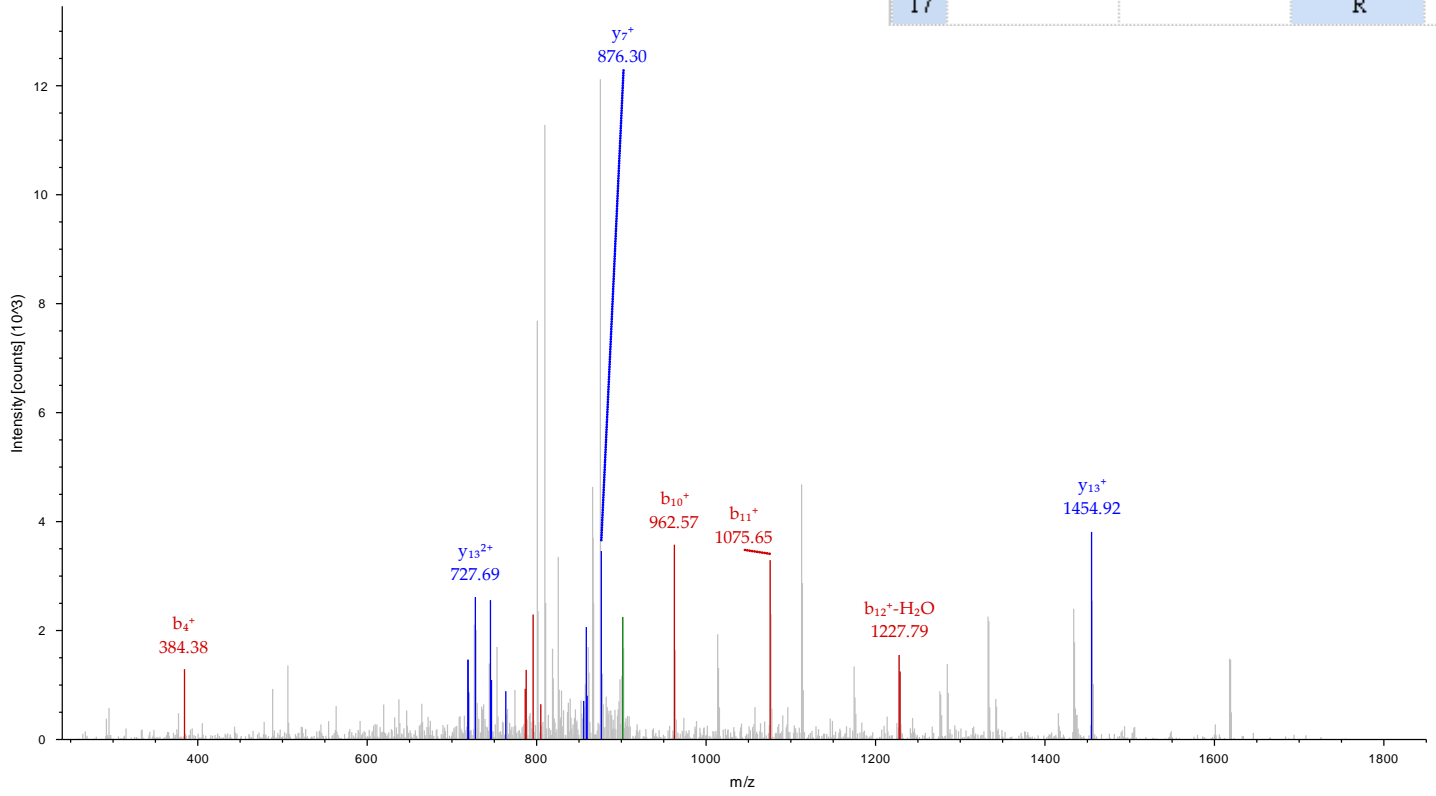

peg.1389 25722

|    |            |            |            |          |            |            |            |    |
|----|------------|------------|------------|----------|------------|------------|------------|----|
| 1  | 171.11281  | 86.06004   | 57.70912   | K-Acetyl |            |            | 33         |    |
| 2  | 268.16558  | 134.58643  | 90.06004   | P        | 3449.82450 | 1725.41589 | 1150.61302 | 32 |
| 3  | 381.24965  | 191.12846  | 127.75473  | L        | 3352.77173 | 1676.88950 | 1118.26209 | 31 |
| 4  | 494.33372  | 247.67050  | 165.44942  | I        | 3239.68766 | 1620.34747 | 1080.56740 | 30 |
| 5  | 565.37084  | 283.18906  | 189.12846  | A        | 3126.60359 | 1563.80543 | 1042.87271 | 29 |
| 6  | 696.41134  | 348.70931  | 232.80863  | M        | 3055.56647 | 1528.28687 | 1019.19367 | 28 |
| 7  | 795.47976  | 398.24352  | 265.83144  | V        | 2924.52597 | 1462.76662 | 975.51351  | 27 |
| 8  | 892.53253  | 446.76990  | 298.18236  | P        | 2825.45755 | 1413.23241 | 942.49070  | 26 |
| 9  | 963.56965  | 482.28846  | 321.86140  | A        | 2728.40478 | 1364.70603 | 910.13978  | 25 |
| 10 | 1050.60168 | 525.80448  | 350.87208  | S        | 2657.36766 | 1329.18747 | 886.46074  | 24 |
| 11 | 1163.68575 | 582.34651  | 388.56677  | L        | 2570.33563 | 1285.67145 | 857.45006  | 23 |
| 12 | 1319.78687 | 660.39707  | 440.60047  | R        | 2457.25156 | 1229.12942 | 819.75537  | 22 |
| 13 | 1420.83455 | 710.92091  | 474.28303  | T        | 2301.15044 | 1151.07886 | 767.72166  | 21 |
| 14 | 1535.86150 | 768.43439  | 512.62535  | D        | 2200.10276 | 1100.55502 | 734.03910  | 20 |
| 15 | 1650.88845 | 825.94786  | 550.96767  | D        | 2085.07581 | 1043.04154 | 695.69679  | 19 |
| 16 | 1737.92048 | 869.46388  | 579.97834  | S        | 1970.04886 | 985.52807  | 657.35447  | 18 |
| 17 | 1852.94743 | 926.97735  | 618.32066  | D        | 1883.01683 | 942.01205  | 628.34379  | 17 |
| 18 | 1952.01585 | 976.51156  | 651.34347  | V        | 1767.98988 | 884.49858  | 590.00478  | 16 |
| 19 | 2039.04788 | 1020.02758 | 680.35414  | S        | 1668.92146 | 834.96437  | 556.97867  | 15 |
| 20 | 2153.09081 | 1077.04904 | 718.36845  | N        | 1581.88943 | 791.44835  | 527.96799  | 14 |
| 21 | 2309.19193 | 1155.09960 | 770.40216  | R        | 1467.84650 | 734.42689  | 489.95368  | 13 |
| 22 | 2422.27600 | 1211.64164 | 808.09685  | I        | 1311.74538 | 656.37633  | 437.91998  | 12 |
| 23 | 2523.32368 | 1262.16548 | 841.77941  | T        | 1198.66131 | 599.83429  | 400.22529  | 11 |
| 24 | 2654.36418 | 1327.68573 | 885.45958  | M        | 1097.61363 | 549.31045  | 366.54273  | 10 |
| 25 | 2767.44825 | 1384.22776 | 923.15427  | I        | 966.57313  | 483.79020  | 322.86256  | 9  |
| 26 | 2880.53232 | 1440.76980 | 960.84896  | L        | 853.48906  | 427.24817  | 285.16787  | 8  |
| 27 | 2951.56944 | 1476.28836 | 984.52800  | A        | 740.40499  | 370.70613  | 247.47318  | 7  |
| 28 | 3065.61237 | 1533.30982 | 1022.54231 | N        | 669.36787  | 335.18757  | 223.79414  | 6  |
| 29 | 3178.69644 | 1589.85186 | 1060.23700 | L        | 555.32494  | 278.16611  | 185.77983  | 5  |
| 30 | 3235.71791 | 1618.36259 | 1079.24415 | G        | 442.24087  | 221.62407  | 148.08514  | 4  |
| 31 | 3336.76559 | 1668.88643 | 1112.92671 | T        | 385.21940  | 193.11334  | 129.07798  | 3  |
| 32 | 3473.82450 | 1737.41589 | 1158.61302 | H        | 284.17172  | 142.58950  | 95.39542   | 2  |
| 33 |            |            |            | K        | 147.11281  | 74.06004   | 49.70912   | 1  |

Extracted from: Z:\Y12AB\SK17-S (Ac)\Chichi-Abaumannii-SK17-R-Acetyl\_DrWu\_20140512.raw #25722 RT: 74.75  
ITMS, CID@35.00, z=+3, Mono m/z=1207.31409 Da, MH+=3619.92771 Da, Match Tol.=0.6 Da

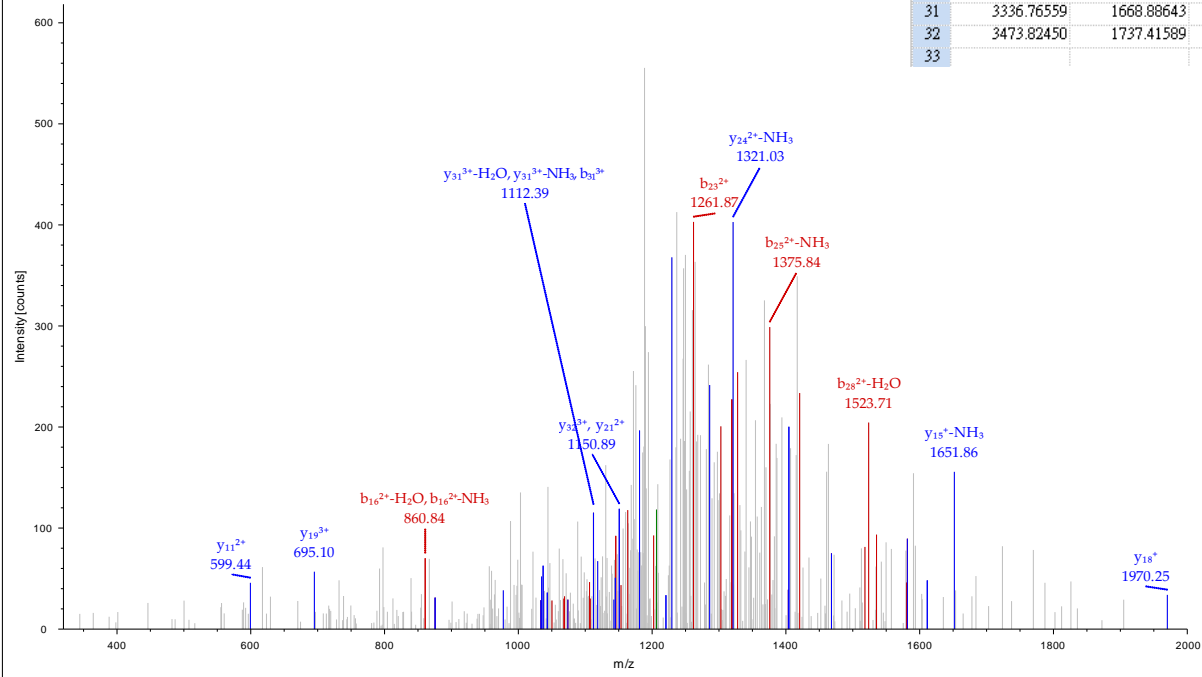

peg.1408 1866

| #1 | b <sup>+</sup> | b <sup>2+</sup> | b <sup>3+</sup> | Seq.     | y <sup>+</sup> | y <sup>2+</sup> | y <sup>3+</sup> | #2 |
|----|----------------|-----------------|-----------------|----------|----------------|-----------------|-----------------|----|
| 1  | 171.11281      | 86.06004        | 57.70912        | K-Acetyl |                |                 |                 | 17 |
| 2  | 272.16049      | 136.58388       | 91.39168        | T        | 1638.75029     | 819.87878       | 546.92161       | 16 |
| 3  | 385.24456      | 193.12592       | 129.08637       | I        | 1537.70261     | 769.35494       | 513.23905       | 15 |
| 4  | 486.29224      | 243.64976       | 162.76893       | T        | 1424.61854     | 712.81291       | 475.54436       | 14 |
| 5  | 633.36066      | 317.18397       | 211.79174       | F        | 1323.57086     | 662.28907       | 441.86180       | 13 |
| 6  | 734.40834      | 367.70781       | 245.47430       | T        | 1176.50244     | 588.75486       | 392.83900       | 12 |
| 7  | 805.44546      | 403.22637       | 269.15334       | A        | 1075.45476     | 538.23102       | 359.15644       | 11 |
| 8  | 902.49823      | 451.75275       | 301.50426       | P        | 1004.41764     | 502.71246       | 335.47740       | 10 |
| 9  | 973.53535      | 487.27131       | 325.18330       | A        | 907.36487      | 454.18607       | 303.12647       | 9  |
| 10 | 1070.58812     | 535.79770       | 357.53422       | P        | 836.32775      | 418.66751       | 279.44743       | 8  |
| 11 | 1173.59731     | 587.30229       | 391.87062       | C        | 739.27498      | 370.14113       | 247.09651       | 7  |
| 12 | 1288.62426     | 644.81577       | 430.21294       | D        | 636.26579      | 318.63653       | 212.76011       | 6  |
| 13 | 1387.69268     | 694.34998       | 463.23574       | V        | 521.23884      | 261.12306       | 174.41780       | 5  |
| 14 | 1490.70187     | 745.85457       | 497.57214       | C        | 422.17042      | 211.58885       | 141.39499       | 4  |
| 15 | 1605.72882     | 803.36805       | 535.91446       | D        | 319.16123      | 160.08425       | 107.05859       | 3  |
| 16 | 1662.75029     | 831.87878       | 554.92161       | G        | 204.13428      | 102.57078       | 68.71628        | 2  |
| 17 |                |                 |                 | K        | 147.11281      | 74.06004        | 49.70912        | 1  |

Extracted from: Z:\712AB\SK17-S (Ac)Chichi-Abaumannii-SK17-R-Acetyl\_DrWu\_20140512.raw #1866 RT: 12.07  
 ITMS, CID@35.00, z=+3, Mono m/z=603.62030 Da, MH+=1808.84635 Da, Match Tol.=0.6 Da

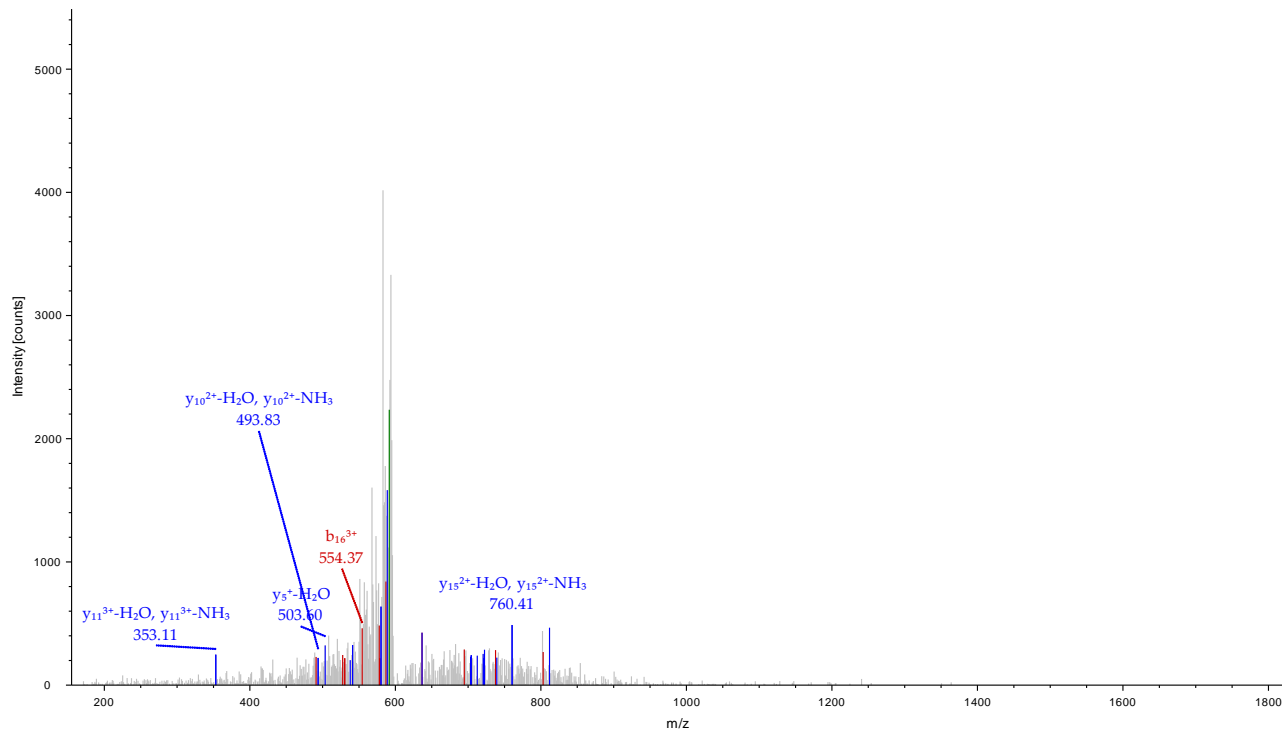



peg.1410 23079

| #1 | b <sup>+</sup> | b <sup>2+</sup> | Seq.     | y <sup>+</sup> | y <sup>2+</sup> | #2 |
|----|----------------|-----------------|----------|----------------|-----------------|----|
| 1  | 164.07060      | 82.53894        | Y        |                |                 | 14 |
| 2  | 279.09755      | 140.05241       | D        | 1487.74111     | 744.37419       | 13 |
| 3  | 410.13805      | 205.57266       | M        | 1372.71416     | 686.86072       | 12 |
| 4  | 580.24358      | 290.62543       | K-Acetyl | 1241.67366     | 621.34047       | 11 |
| 5  | 695.27053      | 348.13890       | D        | 1071.56812     | 536.28770       | 10 |
| 6  | 794.33895      | 397.67311       | V        | 956.54117      | 478.77422       | 9  |
| 7  | 907.42302      | 454.21515       | L        | 857.47275      | 429.24001       | 8  |
| 8  | 964.44449      | 482.72588       | G        | 744.38868      | 372.69798       | 7  |
| 9  | 1077.52856     | 539.26792       | L        | 687.36721      | 344.18724       | 6  |
| 10 | 1191.57149     | 596.28938       | N        | 574.28314      | 287.64521       | 5  |
| 11 | 1306.59844     | 653.80286       | D        | 460.24021      | 230.62374       | 4  |
| 12 | 1405.66686     | 703.33707       | V        | 345.21326      | 173.11027       | 3  |
| 13 | 1533.72544     | 767.36636       | Q        | 246.14484      | 123.57606       | 2  |
| 14 |                |                 | V        | 118.08626      | 59.54677        | 1  |

Extracted from: Z:\712AB\SK17-S (Ac)\Chichi-Abaumannii-SK17-S-Acetyl\_DrWu\_20140512.raw #23079 RT: 69.65  
 TMS, CID@35.00, z=+2, Mono m/z=825.90070 Da, MH+=1650.79411 Da, Match Tol.=0.6 Da

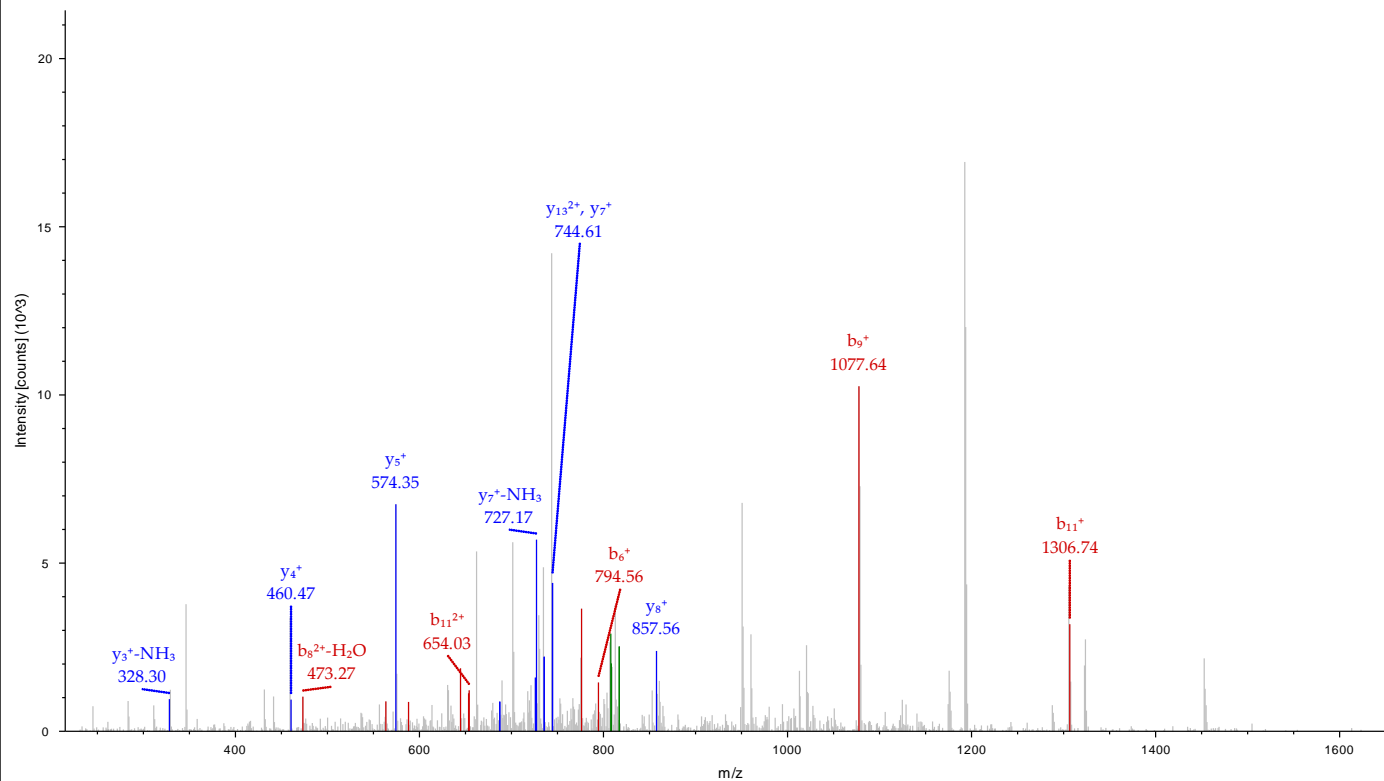

peg.1437 26881

| #1 | b <sup>+</sup> | b <sup>2+</sup> | Seq.        | y <sup>+</sup> | y <sup>2+</sup> | #2 |
|----|----------------|-----------------|-------------|----------------|-----------------|----|
| 1  | 100.03931      | 50.52329        | G-Acetyl    |                |                 | 23 |
| 2  | 247.07473      | 124.04100       | M-Oxidation | 2468.29271     | 1234.64999      | 22 |
| 3  | 304.09620      | 152.55174       | G           | 2321.25730     | 1161.13229      | 21 |
| 4  | 401.14897      | 201.07812       | P           | 2264.23583     | 1132.62155      | 20 |
| 5  | 530.19157      | 265.59942       | E           | 2167.18306     | 1084.09517      | 19 |
| 6  | 644.23450      | 322.62089       | N           | 2038.14046     | 1019.57387      | 18 |
| 7  | 745.28218      | 373.14473       | T           | 1924.09753     | 962.55240       | 17 |
| 8  | 858.36625      | 429.68676       | L           | 1823.04985     | 912.02856       | 16 |
| 9  | 971.45032      | 486.22880       | I           | 1709.96578     | 855.48653       | 15 |
| 10 | 1084.53439     | 542.77083       | L           | 1596.88171     | 798.94449       | 14 |
| 11 | 1183.60281     | 592.30504       | V           | 1483.79764     | 742.40246       | 13 |
| 12 | 1298.62976     | 649.81852       | D           | 1384.72922     | 692.86825       | 12 |
| 13 | 1355.65123     | 678.32925       | G           | 1269.70227     | 635.35477       | 11 |
| 14 | 1525.75676     | 763.38202       | K-Acetyl    | 1212.68080     | 606.84404       | 10 |
| 15 | 1622.80953     | 811.90840       | P           | 1042.57526     | 521.79127       | 9  |
| 16 | 1735.89360     | 868.45044       | I           | 945.52249      | 473.26488       | 8  |
| 17 | 1849.93653     | 925.47190       | N           | 832.43842      | 416.72285       | 7  |
| 18 | 1936.96856     | 968.98792       | S           | 718.39549      | 359.70138       | 6  |
| 19 | 2093.06968     | 1047.03848      | R           | 631.36346      | 316.18537       | 5  |
| 20 | 2207.11261     | 1104.05994      | N           | 475.26234      | 238.13481       | 4  |
| 21 | 2294.14464     | 1147.57596      | S           | 361.21941      | 181.11334       | 3  |
| 22 | 2393.21306     | 1197.11017      | V           | 274.18738      | 137.59733       | 2  |
| 23 |                |                 | R           | 175.11896      | 88.06312        | 1  |

Extracted from: Z:\712AB\SK17-S (Ac)\Chichi-Abaumannii-SK17-S-Acetyl\_DrWu\_20140703.raw #26881 RT: 73.75  
 ITMS, CID@35.00, z=+2, Mono m/z=1284.15796 Da, MH+=2567.30864 Da, Match Tol.=0.6 Da

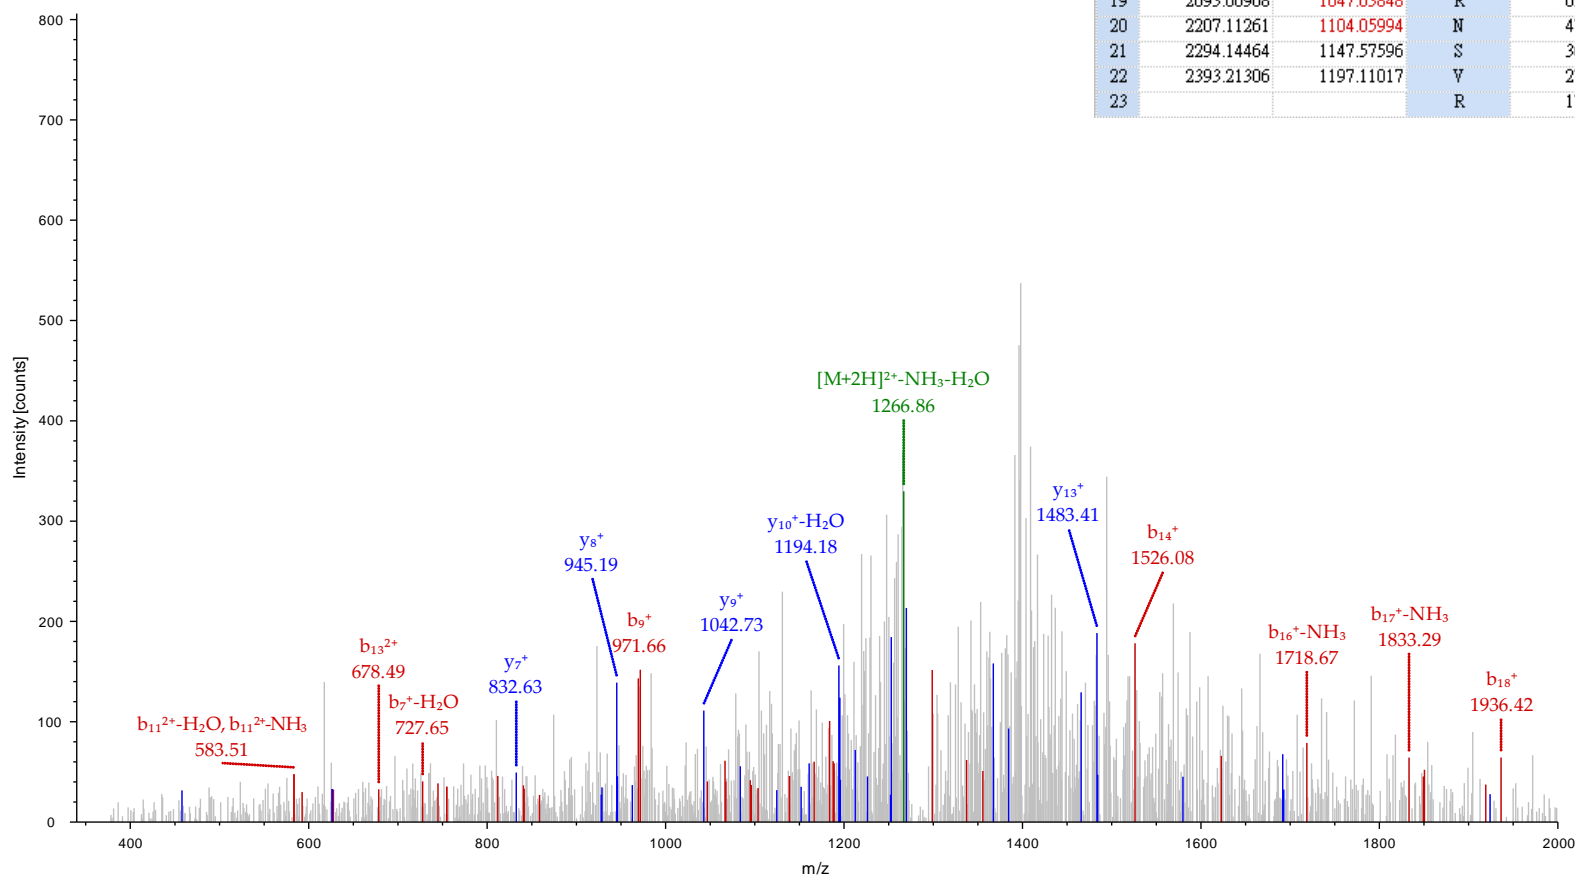

# peg.1448 16835

| #1 | b <sup>+</sup> | b <sup>2+</sup> | b <sup>3+</sup> | Seq.     | y <sup>+</sup> | y <sup>2+</sup> | y <sup>3+</sup> | #2 |
|----|----------------|-----------------|-----------------|----------|----------------|-----------------|-----------------|----|
| 1  | 88.03931       | 44.52329        | 30.01795        | S        |                |                 |                 | 28 |
| 2  | 201.12338      | 101.06533       | 67.71264        | I        | 2804.43139     | 1402.71933      | 935.48198       | 27 |
| 3  | 272.16050      | 136.58389       | 91.39168        | A        | 2691.34732     | 1346.17730      | 897.78729       | 26 |
| 4  | 400.25547      | 200.63137       | 134.09001       | K        | 2620.31020     | 1310.65874      | 874.10825       | 25 |
| 5  | 497.30824      | 249.15776       | 166.44093       | P        | 2492.21523     | 1246.61125      | 831.40993       | 24 |
| 6  | 568.34536      | 284.67632       | 190.11997       | A        | 2395.16246     | 1198.08487      | 799.05900       | 23 |
| 7  | 683.37231      | 342.18979       | 228.46229       | D        | 2324.12534     | 1162.56631      | 775.37996       | 22 |
| 8  | 798.39926      | 399.70327       | 266.80460       | D        | 2209.09839     | 1105.05283      | 737.03765       | 21 |
| 9  | 945.46768      | 473.23748       | 315.82741       | F        | 2094.07144     | 1047.53936      | 698.69533       | 20 |
| 10 | 1115.57321     | 558.29024       | 372.52925       | K-Acetyl | 1947.00302     | 974.00515       | 649.67252       | 19 |
| 11 | 1186.61033     | 593.80880       | 396.20829       | A        | 1776.89748     | 888.95238       | 592.97068       | 18 |
| 12 | 1299.69440     | 650.35084       | 433.90298       | I        | 1705.86036     | 853.43382       | 569.29164       | 17 |
| 13 | 1428.73700     | 714.87214       | 476.91718       | E        | 1592.77629     | 796.89178       | 531.59695       | 16 |
| 14 | 1556.79558     | 778.90143       | 519.60338       | Q        | 1463.73369     | 732.37048       | 488.58275       | 15 |
| 15 | 1655.86400     | 828.43564       | 552.62618       | V        | 1335.67511     | 668.34119       | 445.89655       | 14 |
| 16 | 1712.88547     | 856.94637       | 571.63334       | G        | 1236.60669     | 618.80698       | 412.87375       | 13 |
| 17 | 1799.91750     | 900.46239       | 600.64402       | S        | 1179.58522     | 590.29625       | 393.86659       | 12 |
| 18 | 1913.00157     | 957.00442       | 638.33871       | I        | 1092.55319     | 546.78023       | 364.85591       | 11 |
| 19 | 2000.03360     | 1000.52044      | 667.34938       | S        | 979.46912      | 490.23820       | 327.16122       | 10 |
| 20 | 2071.07072     | 1036.03900      | 691.02842       | A        | 892.43709      | 446.72218       | 298.15055       | 9  |
| 21 | 2185.11365     | 1093.06046      | 729.04273       | N        | 821.39997      | 411.20362       | 274.47151       | 8  |
| 22 | 2272.14568     | 1136.57648      | 758.05341       | S        | 707.35704      | 354.18216       | 236.45720       | 7  |
| 23 | 2387.17263     | 1194.08995      | 796.39573       | D        | 620.32501      | 310.66614       | 207.44652       | 6  |
| 24 | 2488.22031     | 1244.61379      | 830.07829       | T        | 505.29806      | 253.15267       | 169.10420       | 5  |
| 25 | 2589.26799     | 1295.13763      | 863.76085       | T        | 404.25038      | 202.62883       | 135.42164       | 4  |
| 26 | 2688.33641     | 1344.67184      | 896.78365       | V        | 303.20270      | 152.10499       | 101.73908       | 3  |
| 27 | 2745.35788     | 1373.18258      | 915.79081       | G        | 204.13428      | 102.57078       | 68.71628        | 2  |
| 28 |                |                 |                 | K        | 147.11281      | 74.06004        | 49.70912        | 1  |

Extracted from: Z:\712AB\SK17-S (Ac)Chichi-Abaumannii-SK17-S-Acetyl\_DrWu\_20140512.raw #16835 RT: 52.34  
 ITMS, CID@35.00, z=+3, Mono m/z=964.49152 Da, MH+=2891.46000 Da, Match Tol.=0.6 Da

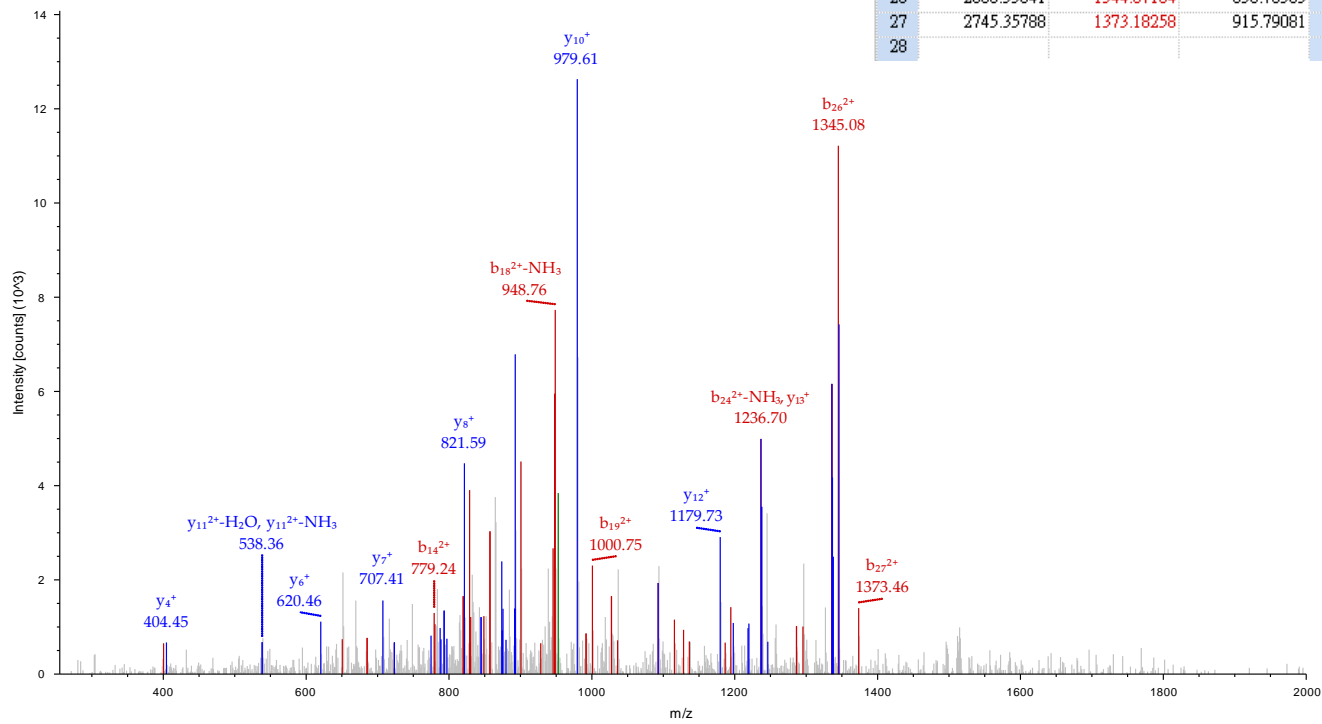

peg.1479 2281

| #1 | b <sup>+</sup> | b <sup>2+</sup> | b <sup>3+</sup> | Seq.     | y <sup>+</sup> | y <sup>2+</sup> | y <sup>3+</sup> | #2 |
|----|----------------|-----------------|-----------------|----------|----------------|-----------------|-----------------|----|
| 1  | 58.02875       | 29.51801        | 20.01443        | G        |                |                 |                 | 11 |
| 2  | 115.05022      | 58.02875        | 39.02159        | G        | 1183.55902     | 592.28315       | 395.19119       | 10 |
| 3  | 252.10913      | 126.55820       | 84.70789        | H        | 1126.53755     | 563.77241       | 376.18403       | 9  |
| 4  | 367.13608      | 184.07168       | 123.05021       | D        | 989.47864      | 495.24296       | 330.49773       | 8  |
| 5  | 466.20450      | 233.60589       | 156.07302       | V        | 874.45169      | 437.72948       | 292.15541       | 7  |
| 6  | 581.23145      | 291.11936       | 194.41533       | D        | 775.38327      | 388.19527       | 259.13261       | 6  |
| 7  | 710.27405      | 355.64066       | 237.42953       | E        | 660.35632      | 330.68180       | 220.79029       | 5  |
| 8  | 825.30100      | 413.15414       | 275.77185       | D        | 531.31372      | 266.16050       | 177.77609       | 4  |
| 9  | 995.40653      | 498.20690       | 332.47369       | K-Acetyl | 416.28677      | 208.64702       | 139.43377       | 3  |
| 10 | 1094.47495     | 547.74111       | 365.49650       | V        | 246.18123      | 123.59425       | 82.73193        | 2  |
| 11 |                |                 |                 | K        | 147.11281      | 74.06004        | 49.70912        | 1  |

Extracted from: Z:\712AB\SK17-S (Ac)\Chichi-Abaumannii-SK17-R-Acetyl\_DrWu\_20140512.raw #2281 RT: 13.22  
 ITMS, CID@35.00, z=+3, Mono m/z=414.19864 Da, MH+=1240.58136 Da, Match Tol.=0.6 Da

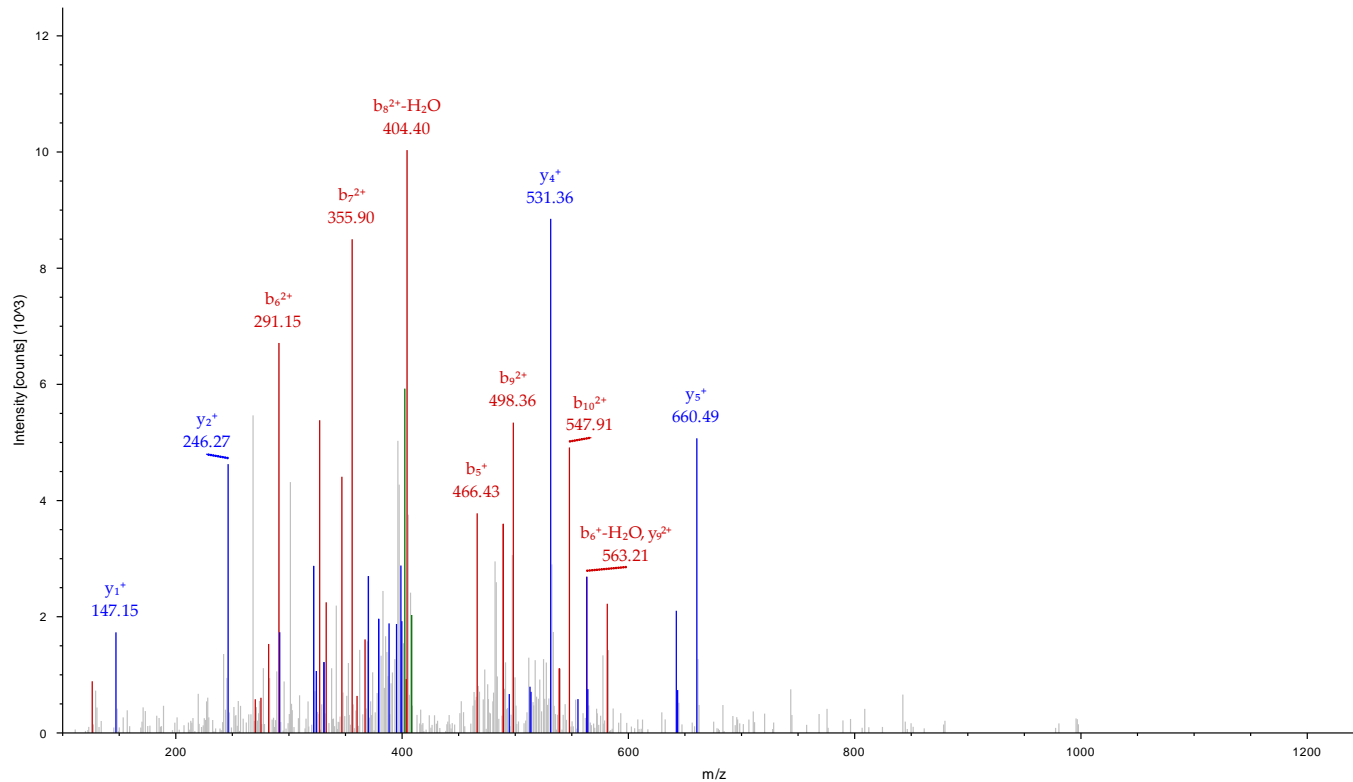

peg.1479 1711

| #1 | b <sup>+</sup> | b <sup>2+</sup> | b <sup>3+</sup> | Seq.     | y <sup>+</sup> | y <sup>2+</sup> | y <sup>3+</sup> | #2 |
|----|----------------|-----------------|-----------------|----------|----------------|-----------------|-----------------|----|
| 1  | 129.10225      | 65.05476        | 43.70560        | K        |                |                 |                 | 12 |
| 2  | 186.12372      | 93.56550        | 62.71276        | G        | 1240.58049     | 620.79388       | 414.19835       | 11 |
| 3  | 243.14519      | 122.07623       | 81.71991        | G        | 1183.55902     | 592.28315       | 395.19119       | 10 |
| 4  | 380.20410      | 190.60569       | 127.40622       | H        | 1126.53755     | 563.77241       | 376.18403       | 9  |
| 5  | 495.23105      | 248.11916       | 165.74853       | D        | 989.47864      | 495.24296       | 330.49773       | 8  |
| 6  | 594.29947      | 297.65337       | 198.77134       | V        | 874.45169      | 437.72948       | 292.15541       | 7  |
| 7  | 709.32642      | 355.16685       | 237.11366       | D        | 775.38327      | 388.19527       | 259.13261       | 6  |
| 8  | 838.36902      | 419.68815       | 280.12786       | E        | 660.35632      | 330.68180       | 220.79029       | 5  |
| 9  | 953.39597      | 477.20162       | 318.47017       | D        | 531.31372      | 266.16050       | 177.77609       | 4  |
| 10 | 1123.50150     | 562.25439       | 375.17202       | K-Acetyl | 416.28677      | 208.64702       | 139.43377       | 3  |
| 11 | 1222.56992     | 611.78860       | 408.19482       | V        | 246.18123      | 123.59425       | 82.73193        | 2  |
| 12 |                |                 |                 | K        | 147.11281      | 74.06004        | 49.70912        | 1  |

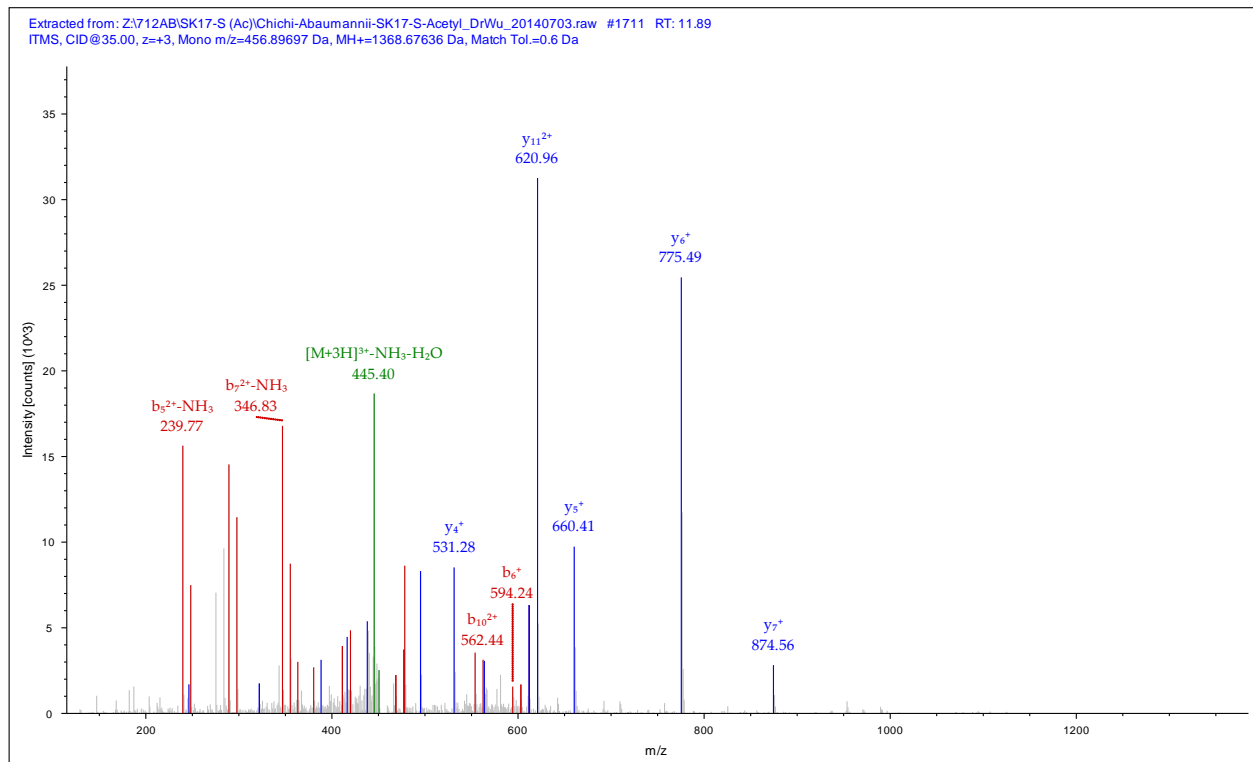

| #1 | b <sup>+</sup> | b <sup>2+</sup> | Seq.        | y <sup>+</sup> | y <sup>2+</sup> | #2 |
|----|----------------|-----------------|-------------|----------------|-----------------|----|
| 1  | 148.04269      | 74.52498        | M-Oxidation |                |                 | 10 |
| 2  | 249.09037      | 125.04882       | T           | 1118.56884     | 559.78806       | 9  |
| 3  | 377.14895      | 189.07811       | Q           | 1017.52116     | 509.26422       | 8  |
| 4  | 547.25449      | 274.13088       | K-Acetyl    | 889.46258      | 445.23493       | 7  |
| 5  | 661.29742      | 331.15235       | N           | 719.35704      | 360.18216       | 6  |
| 6  | 790.34002      | 395.67365       | E           | 605.31411      | 303.16069       | 5  |
| 7  | 903.42409      | 452.21568       | L           | 476.27151      | 238.63939       | 4  |
| 8  | 1018.45104     | 509.72916       | D           | 363.18744      | 182.09736       | 3  |
| 9  | 1119.49872     | 560.25300       | T           | 248.16049      | 124.58388       | 2  |
| 10 |                |                 | K           | 147.11281      | 74.06004        | 1  |

Extracted from: Z:\712AB\SK17-S (Ac)\Chichi-Abaumannii-SK17-S-Acetyl\_DrWu\_20140703.raw #6344 RT: 22.82  
 ITMS, CID@35.00, z=+2, Mono m/z=633.30475 Da, MH+=1265.60222 Da, Match Tol.=0.6 Da

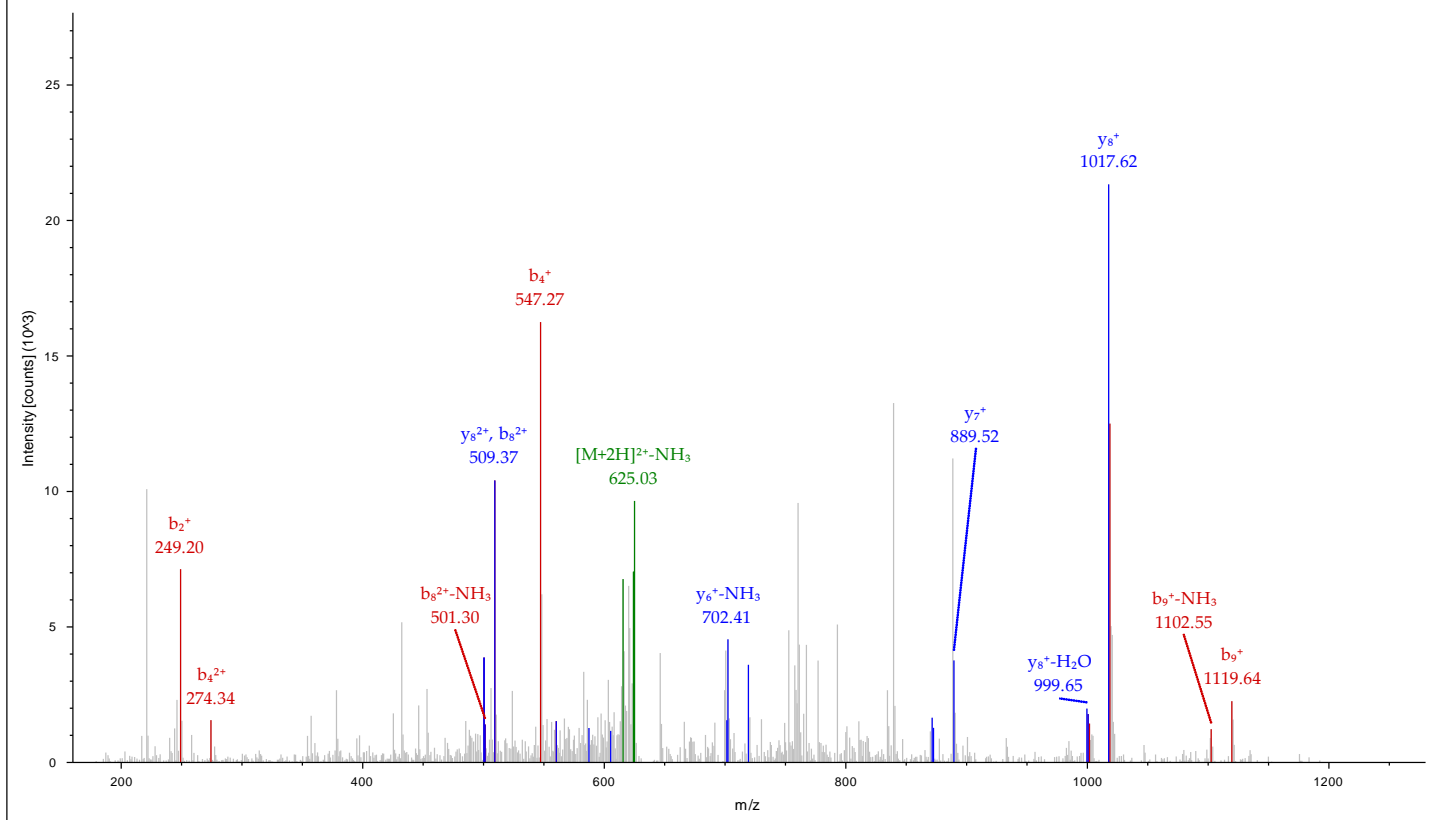

peg.1543 14248

| #1 | b <sup>+</sup> | b <sup>2+</sup> | Seq.     | y <sup>+</sup> | y <sup>2+</sup> | #2 |
|----|----------------|-----------------|----------|----------------|-----------------|----|
| 1  | 148.07570      | 74.54149        | F        |                |                 | 12 |
| 2  | 235.10773      | 118.05750       | S        | 1309.66347     | 655.33537       | 11 |
| 3  | 348.19180      | 174.59954       | L        | 1222.63144     | 611.81936       | 10 |
| 4  | 463.21875      | 232.11301       | D        | 1109.54737     | 555.27732       | 9  |
| 5  | 520.24022      | 260.62375       | G        | 994.52042      | 497.76385       | 8  |
| 6  | 690.34575      | 345.67651       | K-Acetyl | 937.49895      | 469.25311       | 7  |
| 7  | 791.39343      | 396.20035       | T        | 767.39341      | 384.20034       | 6  |
| 8  | 954.45675      | 477.73201       | Y        | 666.34573      | 333.67650       | 5  |
| 9  | 1068.49968     | 534.75348       | N        | 503.28241      | 252.14484       | 4  |
| 10 | 1181.58375     | 591.29551       | L        | 389.23948      | 195.12338       | 3  |
| 11 | 1310.62635     | 655.81681       | E        | 276.15541      | 138.58134       | 2  |
| 12 |                |                 | K        | 147.11281      | 74.06004        | 1  |

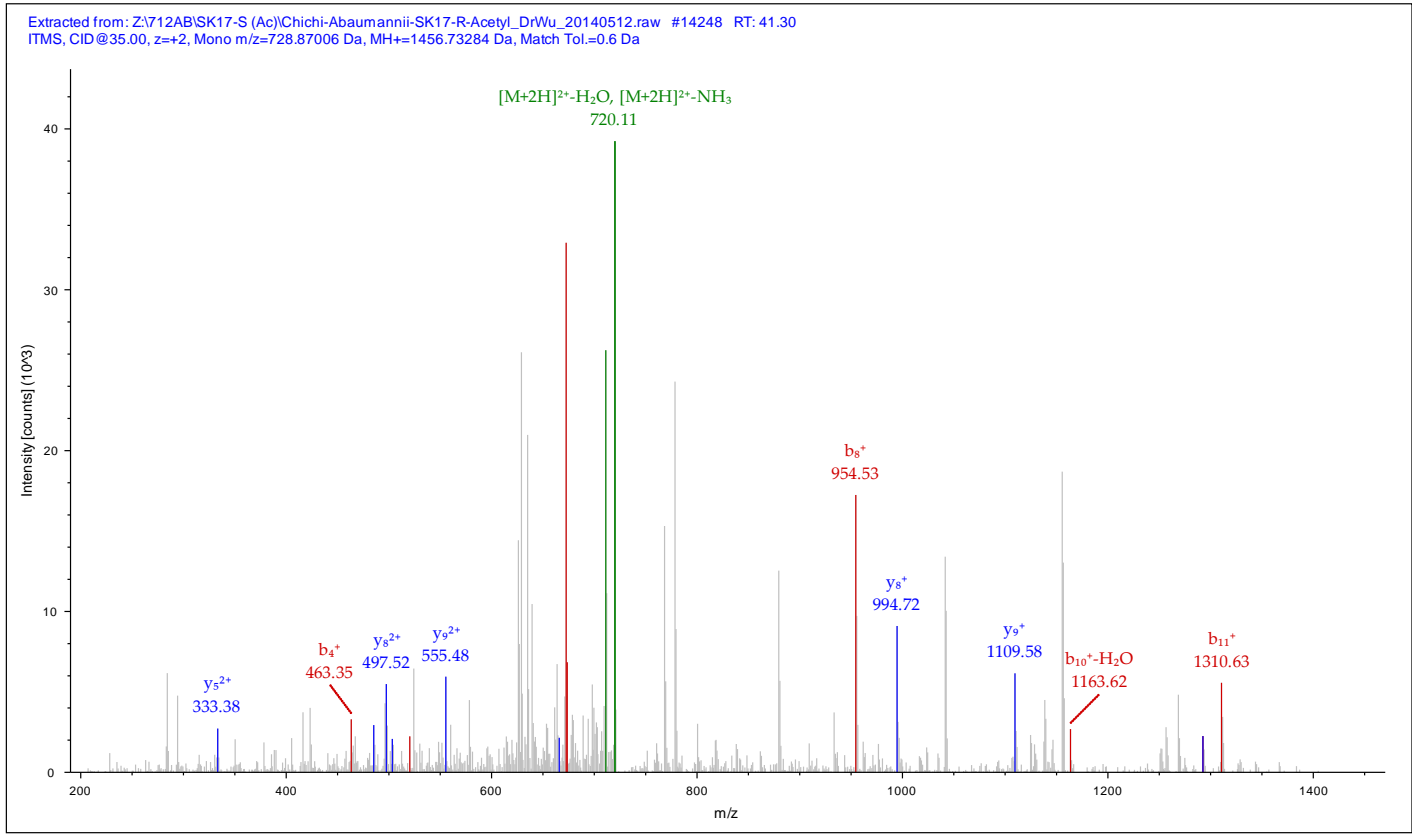



peg.1551 27629

| #1 | b <sup>+</sup> | b <sup>2+</sup> | b <sup>3+</sup> | Seq.     | y <sup>+</sup> | y <sup>2+</sup> | y <sup>3+</sup> | #2 |
|----|----------------|-----------------|-----------------|----------|----------------|-----------------|-----------------|----|
| 1  | 172.06044      | 86.53386        | 58.02500        | E-Acetyl |                |                 |                 | 23 |
| 2  | 342.16598      | 171.58663       | 114.72684       | K-Acetyl | 2620.24481     | 1310.62604      | 874.08645       | 22 |
| 3  | 457.19293      | 229.10010       | 153.06916       | D        | 2450.13927     | 1225.57327      | 817.38461       | 21 |
| 4  | 528.23005      | 264.61866       | 176.74820       | A        | 2335.11232     | 1168.05980      | 779.04229       | 20 |
| 5  | 657.27265      | 329.13996       | 219.76240       | E        | 2264.07520     | 1132.54124      | 755.36325       | 19 |
| 6  | 786.31525      | 393.66126       | 262.77660       | E        | 2135.03260     | 1068.01994      | 712.34905       | 18 |
| 7  | 956.42078      | 478.71403       | 319.47844       | K-Acetyl | 2005.99000     | 1003.49864      | 669.33485       | 17 |
| 8  | 1087.46128     | 544.23428       | 363.15861       | M        | 1835.88447     | 918.44587       | 612.63301       | 16 |
| 9  | 1215.51986     | 608.26357       | 405.84480       | Q        | 1704.84397     | 852.92562       | 568.95284       | 15 |
| 10 | 1286.55698     | 643.78213       | 429.52384       | A        | 1576.78539     | 788.89633       | 526.26665       | 14 |
| 11 | 1399.64105     | 700.32416       | 467.21853       | I        | 1505.74827     | 753.37777       | 502.58761       | 13 |
| 12 | 1513.68398     | 757.34563       | 505.23284       | N        | 1392.66420     | 696.83574       | 464.89292       | 12 |
| 13 | 1612.75240     | 806.87984       | 538.25565       | V        | 1278.62127     | 639.81427       | 426.87861       | 11 |
| 14 | 1683.78952     | 842.39840       | 561.93469       | A        | 1179.55285     | 590.28006       | 393.85580       | 10 |
| 15 | 1846.85284     | 923.93006       | 616.28913       | Y        | 1108.51573     | 554.76150       | 370.17676       | 9  |
| 16 | 1961.87979     | 981.44353       | 654.63145       | D        | 945.45241      | 473.22984       | 315.82232       | 8  |
| 17 | 2062.92747     | 1031.96737      | 688.31401       | T        | 830.42546      | 415.71637       | 277.48000       | 7  |
| 18 | 2176.01154     | 1088.50941      | 726.00870       | L        | 729.37778      | 365.19253       | 243.79744       | 6  |
| 19 | 2263.04357     | 1132.02542      | 755.01937       | S        | 616.29371      | 308.65049       | 206.10275       | 5  |
| 20 | 2377.08650     | 1189.04689      | 793.03368       | N        | 529.26168      | 265.13448       | 177.09208       | 4  |
| 21 | 2474.13927     | 1237.57327      | 825.38461       | P        | 415.21875      | 208.11301       | 139.07777       | 3  |
| 22 | 2603.18187     | 1302.09457      | 868.39881       | E        | 318.16598      | 159.58663       | 106.72684       | 2  |
| 23 |                |                 |                 | K-Acetyl | 189.12338      | 95.06533        | 63.71264        | 1  |

Extracted from: Z:\712AB\SK17-S (Ac)\Chichi-Abaumannii-SK17-S-Acetyl\_DrWu\_20140512.raw #27629 RT: 83.72  
 ITMS, CID@35.00, z=+3, Mono m/z=931.10358 Da, MH+=2791.29618 Da, Match Tol.=0.6 Da

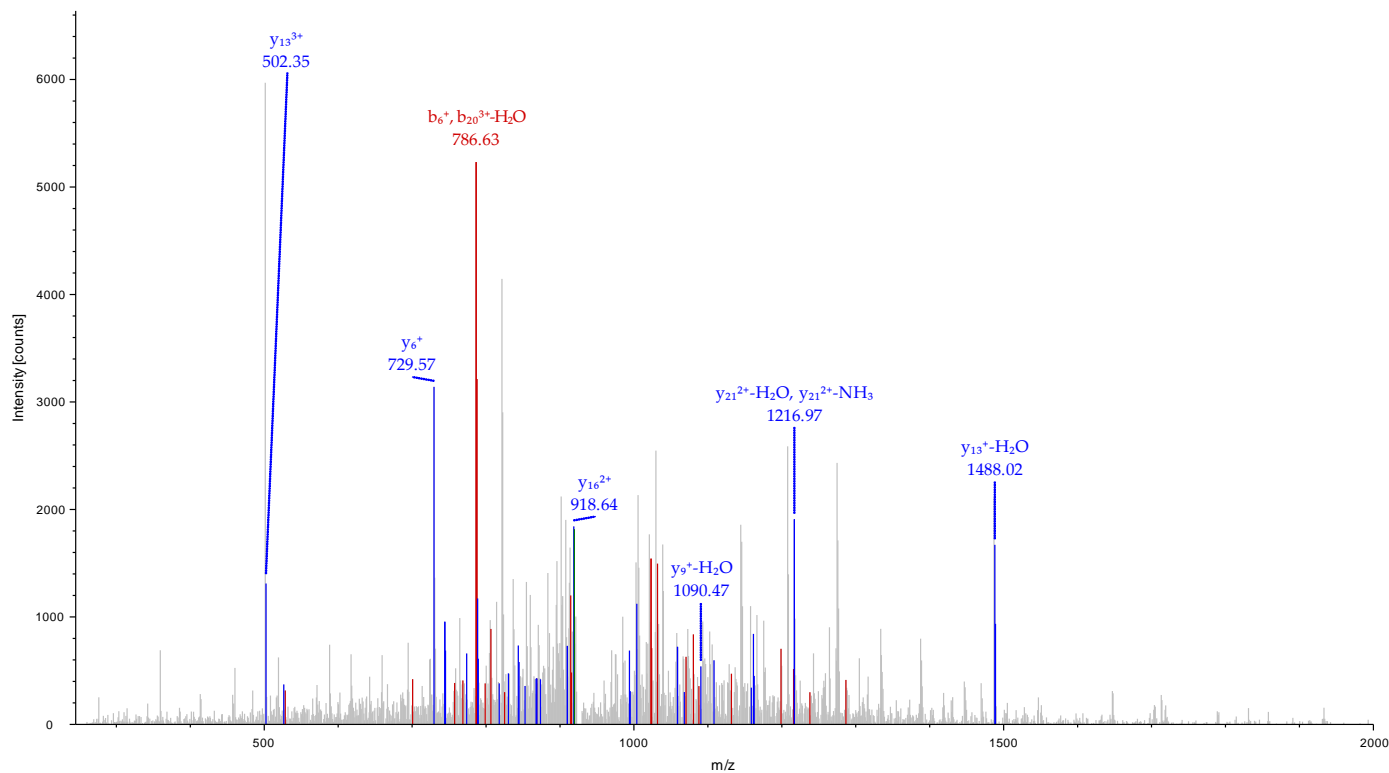

# peg.1558 27715

| #1 | b <sup>+</sup> | b <sup>2+</sup> | b <sup>3+</sup> | b <sup>4+</sup> | Seq.        | y <sup>+</sup> | y <sup>2+</sup> | y <sup>3+</sup> | y <sup>4+</sup> | #2 |
|----|----------------|-----------------|-----------------|-----------------|-------------|----------------|-----------------|-----------------|-----------------|----|
| 1  | 138.06619      | 69.53673        | 46.69358        | 35.27200        | H           |                |                 |                 |                 | 28 |
| 2  | 237.13461      | 119.07094       | 79.71639        | 60.03911        | V           | 3121.68683     | 1561.34705      | 1041.23379      | 781.17717       | 27 |
| 3  | 324.16664      | 162.58696       | 108.72706       | 81.79712        | S           | 3022.61841     | 1511.81284      | 1008.21099      | 756.41006       | 26 |
| 4  | 381.18811      | 191.09769       | 127.73422       | 96.05248        | G           | 2935.58638     | 1468.29683      | 979.20031       | 734.65205       | 25 |
| 5  | 482.23579      | 241.62153       | 161.41678       | 121.31440       | T           | 2878.56491     | 1439.78609      | 960.19315       | 720.39669       | 24 |
| 6  | 595.31986      | 298.16357       | 199.11147       | 149.58542       | I           | 2777.51723     | 1389.26225      | 926.51059       | 695.13477       | 23 |
| 7  | 742.38828      | 371.69778       | 248.13428       | 186.35253       | F           | 2664.43316     | 1332.72022      | 888.81590       | 666.86375       | 22 |
| 8  | 898.48940      | 449.74834       | 300.16798       | 225.37781       | R           | 2517.36474     | 1259.18601      | 839.79310       | 630.09664       | 21 |
| 9  | 1012.53233     | 506.76980       | 338.18229       | 253.88854       | N           | 2361.26362     | 1181.13545      | 787.75939       | 591.07136       | 20 |
| 10 | 1069.55380     | 535.28054       | 357.18945       | 268.14391       | G           | 2247.22069     | 1124.11398      | 749.74508       | 562.56063       | 19 |
| 11 | 1140.59092     | 570.79910       | 380.86849       | 285.90319       | A           | 2190.19922     | 1095.60325      | 730.37392       | 548.30526       | 18 |
| 12 | 1287.65934     | 644.33331       | 429.89130       | 322.67029       | F           | 2119.16210     | 1060.08469      | 707.05888       | 530.54598       | 17 |
| 13 | 1401.70227     | 701.35477       | 467.90561       | 351.18102       | N           | 1972.09368     | 966.55048       | 658.03608       | 493.77888       | 16 |
| 14 | 1571.80780     | 786.40754       | 524.60745       | 393.70741       | K-Acetyl    | 1858.05075     | 929.52901       | 620.02177       | 465.26815       | 15 |
| 15 | 1684.89187     | 842.94957       | 562.30214       | 421.97843       | L           | 1687.94522     | 844.47625       | 563.31992       | 422.74176       | 14 |
| 16 | 1831.96029     | 916.48378       | 611.32495       | 458.74553       | F           | 1574.86115     | 787.93421       | 525.62523       | 394.47074       | 13 |
| 17 | 1918.99232     | 959.99980       | 640.33562       | 480.50354       | S           | 1427.79273     | 714.40000       | 476.60243       | 357.70364       | 12 |
| 18 | 2048.03492     | 1024.52110      | 683.34982       | 512.76419       | E           | 1340.76070     | 670.88399       | 447.59175       | 335.94563       | 11 |
| 19 | 2208.06558     | 1104.53643      | 736.69338       | 552.77185       | C-Carbam... | 1211.71810     | 606.36269       | 404.57755       | 303.68498       | 10 |
| 20 | 2321.14965     | 1161.07846      | 774.38807       | 581.04287       | L           | 1051.68744     | 526.34736       | 351.23400       | 263.67732       | 9  |
| 21 | 2418.20242     | 1209.60485      | 806.73899       | 605.30606       | P           | 938.60337      | 469.80532       | 313.53931       | 235.40630       | 8  |
| 22 | 2546.26100     | 1273.63414      | 849.42518       | 637.32071       | Q           | 841.55060      | 421.27894       | 281.18838       | 211.14311       | 7  |
| 23 | 2659.34507     | 1330.17617      | 887.11987       | 665.59172       | L           | 713.49202      | 357.24965       | 238.50219       | 179.12846       | 6  |
| 24 | 2772.42914     | 1386.71821      | 924.81456       | 693.86274       | L           | 600.40795      | 300.70761       | 200.80750       | 150.85745       | 5  |
| 25 | 2900.48772     | 1450.74750      | 967.50076       | 725.87739       | Q           | 487.32388      | 244.16558       | 163.11281       | 122.58643       | 4  |
| 26 | 2999.55614     | 1500.28171      | 1000.52356      | 750.64449       | V           | 359.26530      | 180.13629       | 120.42662       | 90.57178        | 3  |
| 27 | 3112.64021     | 1556.82374      | 1038.21825      | 778.91551       | L           | 260.19688      | 130.60208       | 87.40381        | 65.80468        | 2  |
| 28 |                |                 |                 |                 | K           | 147.11281      | 74.06004        | 49.70912        | 37.53366        | 1  |

Extracted from: Z:\712AB\SK17-S (Ac)\Chichi-Abaumannii-SK17-S-Acetyl\_DrWu\_20140703.raw #27715 RT: 76.29 ITMS, CID@35.00, z=+4, Mono m/z=815.44635 Da, MH+=3258.76357 Da, Match Tol.=0.6 Da

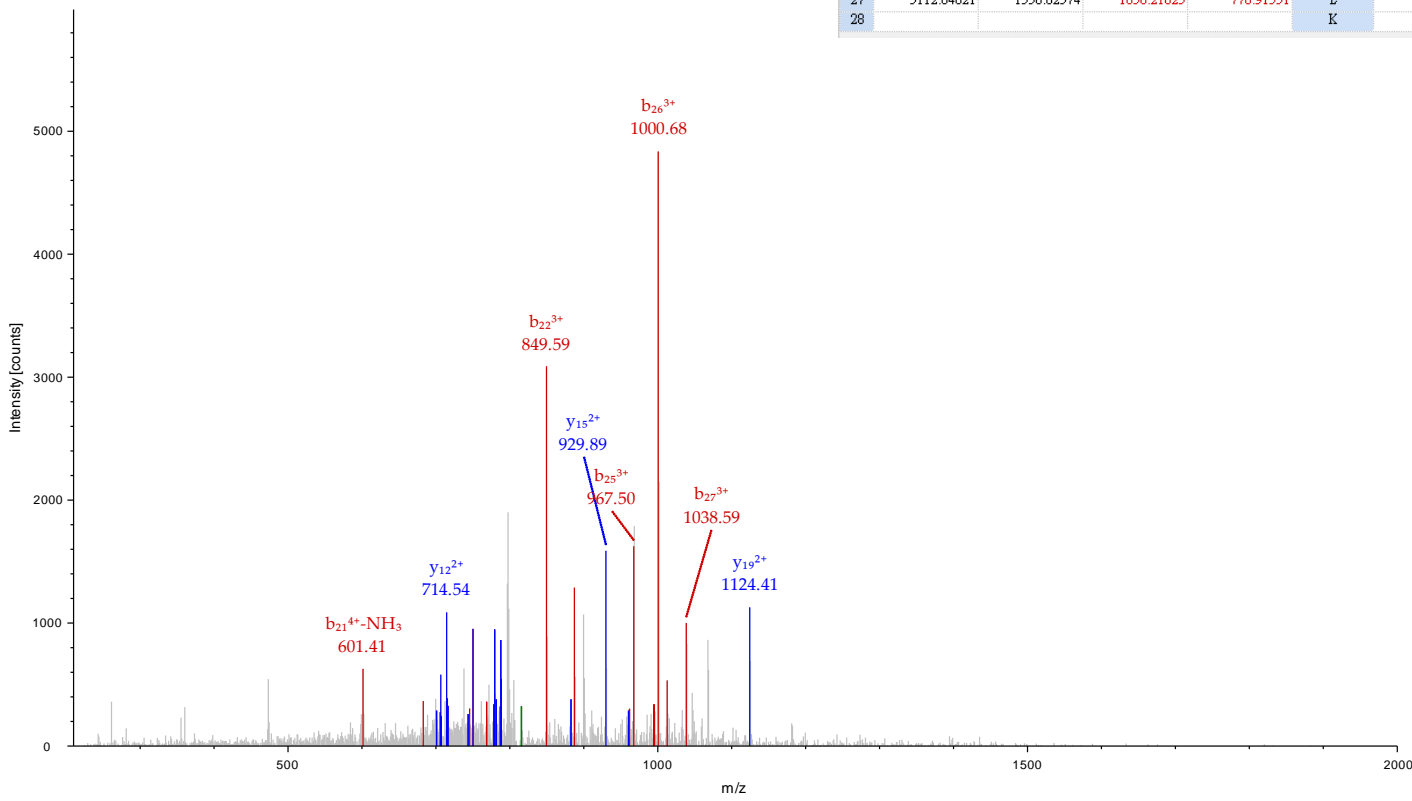

peg.1615 27340  
 peg.2943 27340

| #1 | b <sup>+</sup> | b <sup>2+</sup> | Seq.     | y <sup>+</sup> | y <sup>2+</sup> | #2 |
|----|----------------|-----------------|----------|----------------|-----------------|----|
| 1  | 58.02875       | 29.51801        | G        |                |                 | 18 |
| 2  | 172.07168      | 86.53948        | N        | 2120.04078     | 1060.52403      | 17 |
| 3  | 229.09315      | 115.05021       | G        | 2005.99785     | 1003.50256      | 16 |
| 4  | 392.15647      | 196.58187       | Y        | 1948.97638     | 974.99183       | 15 |
| 5  | 520.25144      | 260.62936       | K        | 1785.91306     | 893.46017       | 14 |
| 6  | 619.31986      | 310.16357       | V        | 1657.81809     | 829.41268       | 13 |
| 7  | 734.34681      | 367.67704       | D        | 1558.74967     | 779.87847       | 12 |
| 8  | 897.41013      | 449.20870       | Y        | 1443.72272     | 722.36500       | 11 |
| 9  | 1067.51566     | 534.26147       | K-Acetyl | 1280.65940     | 640.83334       | 10 |
| 10 | 1182.54261     | 591.77494       | D        | 1110.55387     | 555.78057       | 9  |
| 11 | 1296.58554     | 648.79641       | N        | 995.52692      | 498.26710       | 8  |
| 12 | 1410.62847     | 705.81787       | N        | 881.48399      | 441.24563       | 7  |
| 13 | 1523.71254     | 762.35991       | L        | 767.44106      | 384.22417       | 6  |
| 14 | 1620.76531     | 810.88629       | P        | 654.35699      | 327.68213       | 5  |
| 15 | 1790.87085     | 895.93906       | K-Acetyl | 557.30422      | 279.15575       | 4  |
| 16 | 1887.92362     | 944.46545       | P        | 387.19868      | 194.10298       | 3  |
| 17 | 2002.95057     | 1001.97892      | D        | 290.14591      | 145.57659       | 2  |
| 18 |                |                 | R        | 175.11896      | 88.06312        | 1  |

Extracted from: Z:\712AB\SK17-S (Ac)Chichi-Abaumannii-SK17-S-Acetyl\_DrWu\_20140512.raw #27340 RT: 82.83  
 ITMS, CID@35.00, z=+2, Mono m/z=1089.04407 Da, MH+=2177.08086 Da, Match Tol.=0.6 Da

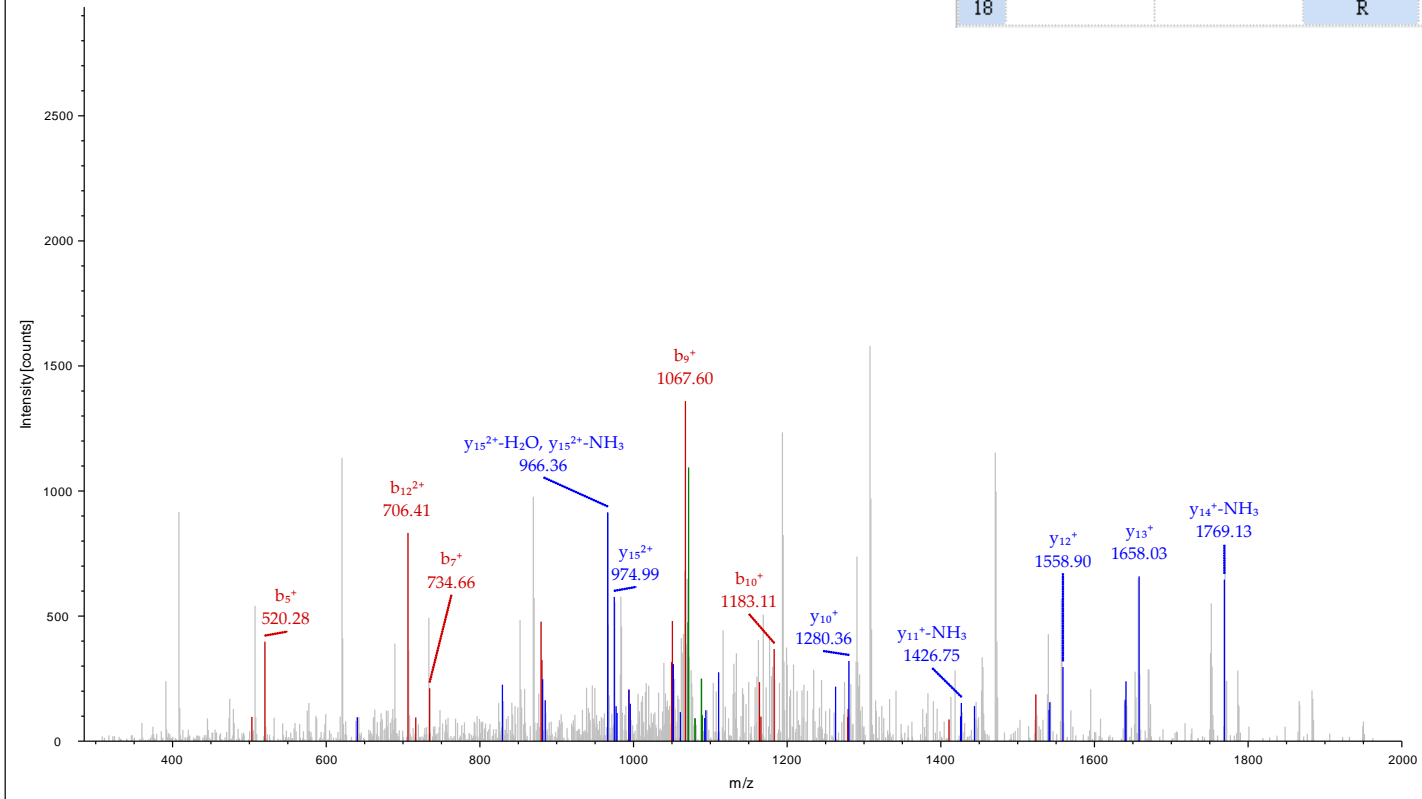

peg.1646 19843

| #1 | b <sup>+</sup> | b <sup>2+</sup> | b <sup>3+</sup> | b <sup>4+</sup> | Seq.        | y <sup>+</sup> | y <sup>2+</sup> | y <sup>3+</sup> | y <sup>4+</sup> | #2 |
|----|----------------|-----------------|-----------------|-----------------|-------------|----------------|-----------------|-----------------|-----------------|----|
| 1  | 130.04987      | 65.52857        | 44.02147        | 33.26793        | S-Acetyl    |                |                 |                 |                 | 25 |
| 2  | 243.13394      | 122.07061       | 81.71616        | 61.53894        | I           | 2592.26540     | 1296.63634      | 864.75998       | 648.82181       | 24 |
| 3  | 314.17106      | 157.58917       | 105.39520       | 79.29822        | A           | 2479.18133     | 1240.09430      | 827.06529       | 620.55079       | 23 |
| 4  | 385.20818      | 193.10773       | 129.07424       | 97.05750        | A           | 2408.14421     | 1204.57574      | 803.38625       | 602.79151       | 22 |
| 5  | 532.24360      | 266.62544       | 178.08605       | 133.81636       | M-Oxidation | 2337.10709     | 1169.05718      | 779.70721       | 585.03223       | 21 |
| 6  | 631.31202      | 316.15965       | 211.10886       | 158.58346       | V           | 2190.07168     | 1095.53948      | 730.69541       | 548.27338       | 20 |
| 7  | 745.35495      | 373.18111       | 249.12317       | 187.09419       | N           | 2091.00326     | 1046.00527      | 697.67260       | 523.50627       | 19 |
| 8  | 802.37642      | 401.69185       | 268.13032       | 201.34956       | G           | 1976.96033     | 988.98380       | 659.65829       | 494.99554       | 18 |
| 9  | 933.41692      | 467.21210       | 311.81049       | 234.10969       | M           | 1919.93886     | 960.47307       | 640.65114       | 480.74017       | 17 |
| 10 | 1036.42611     | 518.71669       | 346.14689       | 259.86198       | C           | 1788.89836     | 894.95282       | 596.97097       | 447.98005       | 16 |
| 11 | 1164.52108     | 582.76418       | 388.84521       | 291.88573       | K           | 1685.88917     | 843.44822       | 562.63457       | 422.22775       | 15 |
| 12 | 1292.57966     | 646.79347       | 431.53140       | 323.90037       | Q           | 1557.79420     | 779.40074       | 519.93625       | 390.20401       | 14 |
| 13 | 1395.58885     | 698.29806       | 465.86780       | 349.65267       | C           | 1429.73562     | 715.37145       | 477.25006       | 358.18936       | 13 |
| 14 | 1452.61032     | 726.80880       | 484.87496       | 363.90804       | G           | 1326.72643     | 663.86685       | 442.91366       | 332.43706       | 12 |
| 15 | 1622.71585     | 811.86156       | 541.57680       | 406.43442       | K-Acetyl    | 1269.70496     | 635.35612       | 423.90650       | 318.18170       | 11 |
| 16 | 1751.75845     | 876.38286       | 584.59100       | 438.69507       | E           | 1099.59942     | 550.30335       | 367.20466       | 275.65531       | 10 |
| 17 | 1848.81122     | 924.90925       | 616.94192       | 462.95826       | P           | 970.55682      | 485.78205       | 324.19046       | 243.39466       | 9  |
| 18 | 1961.89529     | 981.45128       | 654.63661       | 491.22928       | L           | 873.50405      | 437.25566       | 291.83953       | 219.13147       | 8  |
| 19 | 2089.95387     | 1045.48057      | 697.32281       | 523.24393       | Q           | 760.41998      | 380.71363       | 254.14484       | 190.86045       | 7  |
| 20 | 2160.99099     | 1080.99913      | 721.00185       | 541.00321       | A           | 632.36140      | 316.68434       | 211.45865       | 158.84581       | 6  |
| 21 | 2274.07506     | 1137.54117      | 758.69654       | 569.27422       | I           | 561.32428      | 281.16578       | 187.77961       | 141.08653       | 5  |
| 22 | 2373.14348     | 1187.07538      | 791.71934       | 594.04133       | V           | 448.24021      | 224.62374       | 150.08492       | 112.81551       | 4  |
| 23 | 2460.17551     | 1230.59139      | 820.73002       | 615.79934       | S           | 349.17179      | 175.08953       | 117.06211       | 88.04841        | 3  |
| 24 | 2575.20246     | 1288.10487      | 859.07234       | 644.55607       | D           | 262.13976      | 131.57352       | 88.05144        | 66.29040        | 2  |
| 25 |                |                 |                 |                 | K           | 147.11281      | 74.06004        | 49.70912        | 37.53366        | 1  |

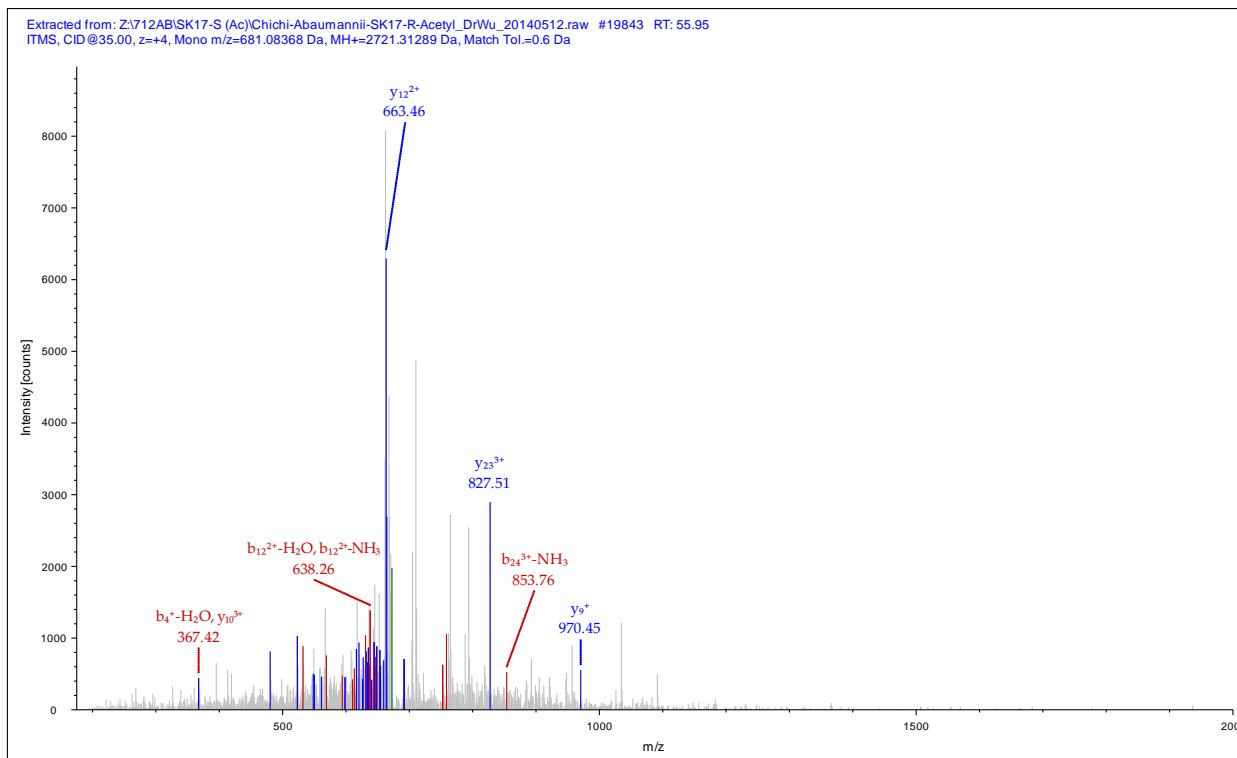

peg.1707 9382

| #1 | b <sup>+</sup> | b <sup>2+</sup> | Seq.        | y <sup>+</sup> | y <sup>2+</sup> | #2 |
|----|----------------|-----------------|-------------|----------------|-----------------|----|
| 1  | 172.06044      | 86.53386        | E-Acetyl    |                |                 | 11 |
| 2  | 342.16598      | 171.58663       | K-Acetyl    | 1147.61404     | 574.31066       | 10 |
| 3  | 489.20139      | 245.10433       | M-Oxidation | 977.50851      | 489.25789       | 9  |
| 4  | 560.23851      | 280.62289       | A           | 830.47309      | 415.74018       | 8  |
| 5  | 631.27563      | 316.14145       | A           | 759.43597      | 380.22162       | 7  |
| 6  | 718.30766      | 359.65747       | S           | 688.39885      | 344.70306       | 6  |
| 7  | 831.39173      | 416.19950       | L           | 601.36682      | 301.18705       | 5  |
| 8  | 960.43433      | 480.72080       | E           | 488.28275      | 244.64501       | 4  |
| 9  | 1031.47145     | 516.23936       | A           | 359.24015      | 180.12371       | 3  |
| 10 | 1144.55552     | 572.78140       | L           | 288.20303      | 144.60515       | 2  |
| 11 |                |                 | R           | 175.11896      | 88.06312        | 1  |

Extracted from: Z:\712AB\SK17-S (Ac)\Chichi-Abaumannii-SK17-S-Acetyl\_DrWu\_20140703.raw #9382 RT: 29.85  
 ITMS, CID@35.00, z=+2, Mono m/z=659.83527 Da, MH+=1318.66326 Da, Match Tol.=0.6 Da

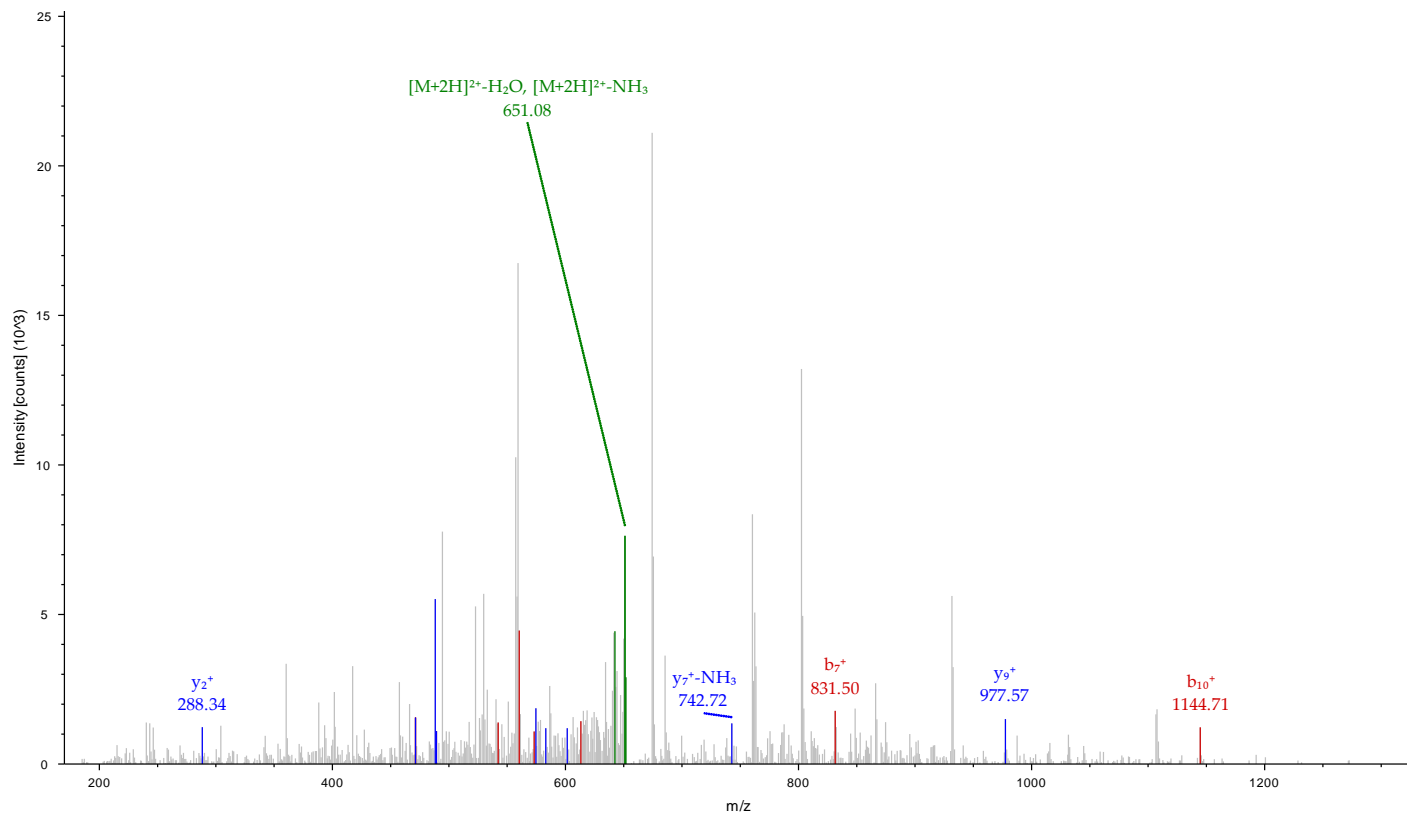

peg.1712 13076

| #1 | b <sup>+</sup> | b <sup>2+</sup> | Seq.     | y <sup>+</sup> | y <sup>2+</sup> | #2 |
|----|----------------|-----------------|----------|----------------|-----------------|----|
| 1  | 130.04988      | 65.52858        | E        |                |                 | 11 |
| 2  | 300.15541      | 150.58134       | K-Acetyl | 1318.62342     | 659.81535       | 10 |
| 3  | 429.19801      | 215.10264       | E        | 1148.51788     | 574.76258       | 9  |
| 4  | 542.28208      | 271.64468       | I        | 1019.47528     | 510.24128       | 8  |
| 5  | 629.31411      | 315.16069       | S        | 906.39121      | 453.69924       | 7  |
| 6  | 758.35671      | 379.68199       | E        | 819.35918      | 410.18323       | 6  |
| 7  | 873.38366      | 437.19547       | D        | 690.31658      | 345.66193       | 5  |
| 8  | 988.41061      | 494.70894       | D        | 575.28963      | 288.14845       | 4  |
| 9  | 1117.45321     | 559.23024       | E        | 460.26268      | 230.63498       | 3  |
| 10 | 1273.55433     | 637.28080       | R        | 331.22008      | 166.11368       | 2  |
| 11 |                |                 | R        | 175.11896      | 88.06312        | 1  |

Extracted from: Z:\712AB\SK17-S (Ac)\Chichi-Abaumannii-SK17-S-Acetyl\_DrWu\_20140703.raw #13076 RT: 38.56  
 ITMS, CID@35.00, z=+2, Mono m/z=724.33929 Da, MH+=1447.67131 Da, Match Tol.=0.6 Da

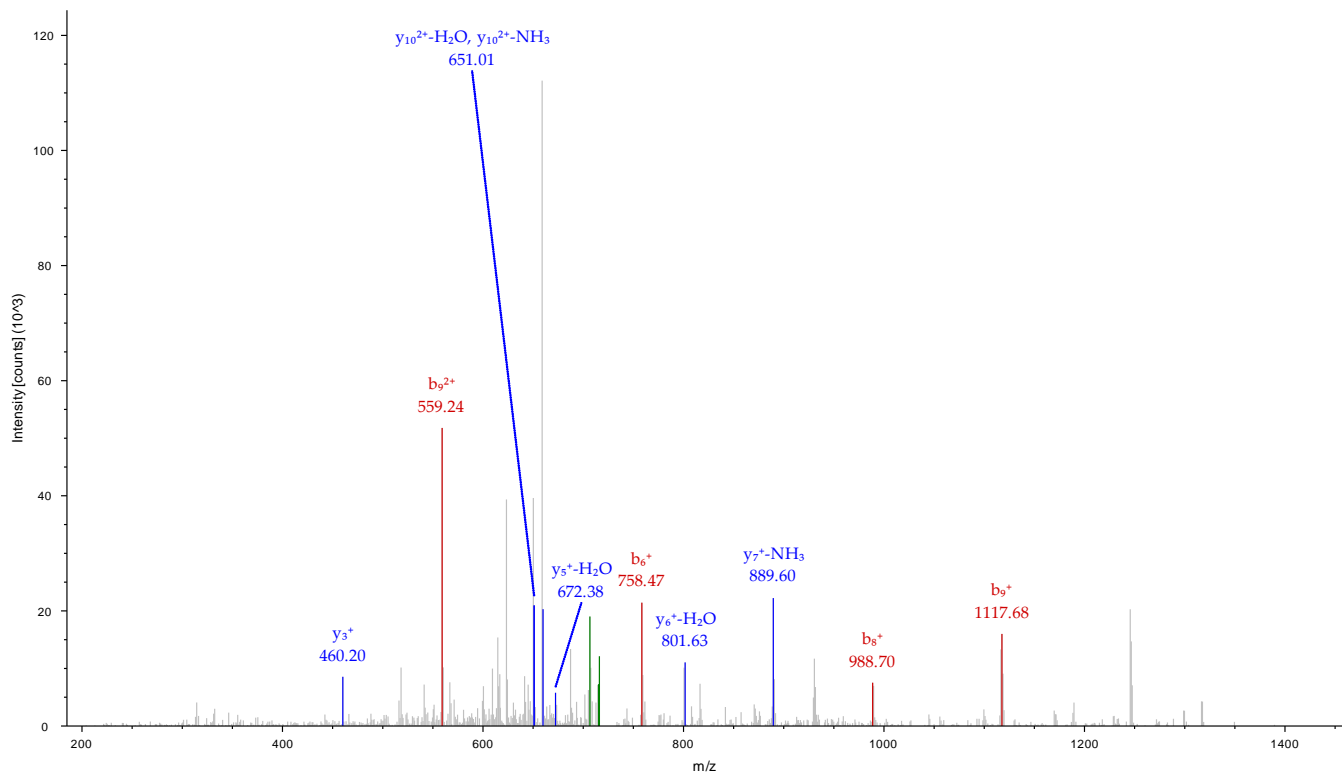

# peg.1713 23766

| #1 | b <sup>+</sup> | b <sup>2+</sup> | b <sup>3+</sup> | Seq.        | y <sup>+</sup> | y <sup>2+</sup> | y <sup>3+</sup> | #2 |
|----|----------------|-----------------|-----------------|-------------|----------------|-----------------|-----------------|----|
| 1  | 156.10191      | 78.55459        | 52.70549        | L-Acetyl    |                |                 |                 | 38 |
| 2  | 213.12338      | 107.06533       | 71.71264        | G           | 4119.02063     | 2060.01395      | 1373.67839      | 37 |
| 3  | 312.19180      | 156.59954       | 104.73545       | Y           | 4061.99916     | 2031.50322      | 1354.67124      | 36 |
| 4  | 459.22722      | 230.11725       | 153.74726       | M-Oxidation | 3962.93074     | 1981.96901      | 1321.64843      | 35 |
| 5  | 574.25417      | 287.63072       | 192.08957       | D           | 3815.89532     | 1908.45130      | 1272.63662      | 34 |
| 6  | 687.33824      | 344.17276       | 229.78426       | L           | 3700.86837     | 1850.93782      | 1234.29431      | 33 |
| 7  | 788.38592      | 394.69660       | 263.46682       | T           | 3587.78430     | 1794.39579      | 1196.59962      | 32 |
| 8  | 859.42304      | 430.21516       | 287.14586       | A           | 3486.73662     | 1743.87195      | 1162.91706      | 31 |
| 9  | 972.50711      | 486.75719       | 324.84055       | I           | 3415.69950     | 1708.35339      | 1139.23802      | 30 |
| 10 | 1075.51630     | 538.26179       | 359.17695       | C           | 3302.61543     | 1651.81135      | 1101.54333      | 29 |
| 11 | 1188.60037     | 594.80382       | 396.87164       | L           | 3199.60624     | 1600.30676      | 1067.20693      | 28 |
| 12 | 1348.63102     | 674.81915       | 450.21519       | C-Carbam... | 3086.52217     | 1543.76472      | 1029.51274      | 27 |
| 13 | 1504.73214     | 752.86971       | 502.24890       | R           | 2926.49152     | 1463.74940      | 976.16869       | 26 |
| 14 | 1619.75909     | 810.38318       | 540.59121       | D           | 2770.39040     | 1385.69884      | 924.13498       | 25 |
| 15 | 1756.81800     | 878.91264       | 586.27752       | H           | 2655.36345     | 1328.18536      | 885.79267       | 24 |
| 16 | 1870.86093     | 935.93410       | 624.29183       | N           | 2518.30454     | 1259.65591      | 840.10636       | 23 |
| 17 | 1969.92935     | 985.46831       | 657.31463       | Y           | 2404.26161     | 1202.63444      | 802.09205       | 22 |
| 18 | 2066.98212     | 1033.99470      | 689.66556       | F           | 2305.19319     | 1153.10023      | 769.06925       | 21 |
| 19 | 2180.06619     | 1090.53673      | 727.36025       | L           | 2208.14042     | 1104.57385      | 736.71832       | 20 |
| 20 | 2308.12477     | 1154.56602      | 770.04644       | Q           | 2095.05635     | 1048.03181      | 699.02363       | 19 |
| 21 | 2407.19319     | 1204.10023      | 803.06925       | Y           | 1966.99777     | 984.00252       | 656.33744       | 18 |
| 22 | 2554.26161     | 1277.63444      | 852.09205       | F           | 1867.92935     | 934.46831       | 623.31463       | 17 |
| 23 | 2669.28836     | 1335.14792      | 890.43437       | D           | 1720.86093     | 860.93410       | 574.29183       | 16 |
| 24 | 2800.32906     | 1400.66817      | 934.11454       | M           | 1605.83398     | 803.42063       | 535.94951       | 15 |
| 25 | 2914.37199     | 1457.68963      | 972.12885       | N           | 1474.79348     | 737.90038       | 492.26934       | 14 |
| 26 | 3084.47753     | 1542.74240      | 1028.83069      | K-Acetyl    | 1360.75055     | 680.87891       | 454.25593       | 13 |
| 27 | 3171.50956     | 1586.25942      | 1057.84137      | S           | 1190.64501     | 595.82614       | 397.55319       | 12 |
| 28 | 3228.53103     | 1614.76915      | 1076.84853      | G           | 1103.61298     | 552.31013       | 368.54251       | 11 |
| 29 | 3299.56815     | 1650.28771      | 1100.52757      | A           | 1046.59151     | 523.79939       | 349.53535       | 10 |
| 30 | 3412.65222     | 1706.82975      | 1138.22226      | L           | 975.55439      | 488.28083       | 325.85631       | 9  |
| 31 | 3525.73629     | 1763.37178      | 1175.91695      | L           | 862.47032      | 431.73880       | 288.16162       | 8  |
| 32 | 3612.76832     | 1806.88780      | 1204.92762      | S           | 749.38625      | 375.19676       | 250.46693       | 7  |
| 33 | 3711.83674     | 1856.42201      | 1237.95043      | Y           | 662.35422      | 331.68075       | 221.45626       | 6  |
| 34 | 3810.90516     | 1905.95622      | 1270.97324      | Y           | 563.28580      | 282.14654       | 188.43345       | 5  |
| 35 | 3941.94566     | 1971.47647      | 1314.65340      | M           | 464.21738      | 232.61233       | 155.41064       | 4  |
| 36 | 3998.96713     | 1999.98720      | 1333.66056      | G           | 333.17688      | 167.09208       | 111.73048       | 3  |
| 37 | 4128.00973     | 2064.50830      | 1376.67476      | E           | 276.15541      | 138.58134       | 92.72332        | 2  |
| 38 |                |                 |                 | K           | 147.11281      | 74.06004        | 49.70912        | 1  |

Extracted from: Z:\712AB\SK17-S (Ac)Chichi-Abaumannii-SK17-S-Acetyl\_DrWu\_20140703.raw #23766 RT: 64.91  
 ITMS, CID@35.00, z=+3, Mono m/z=1425.37378 Da, MH+=4274.10678 Da, Match Tol.=0.6 Da

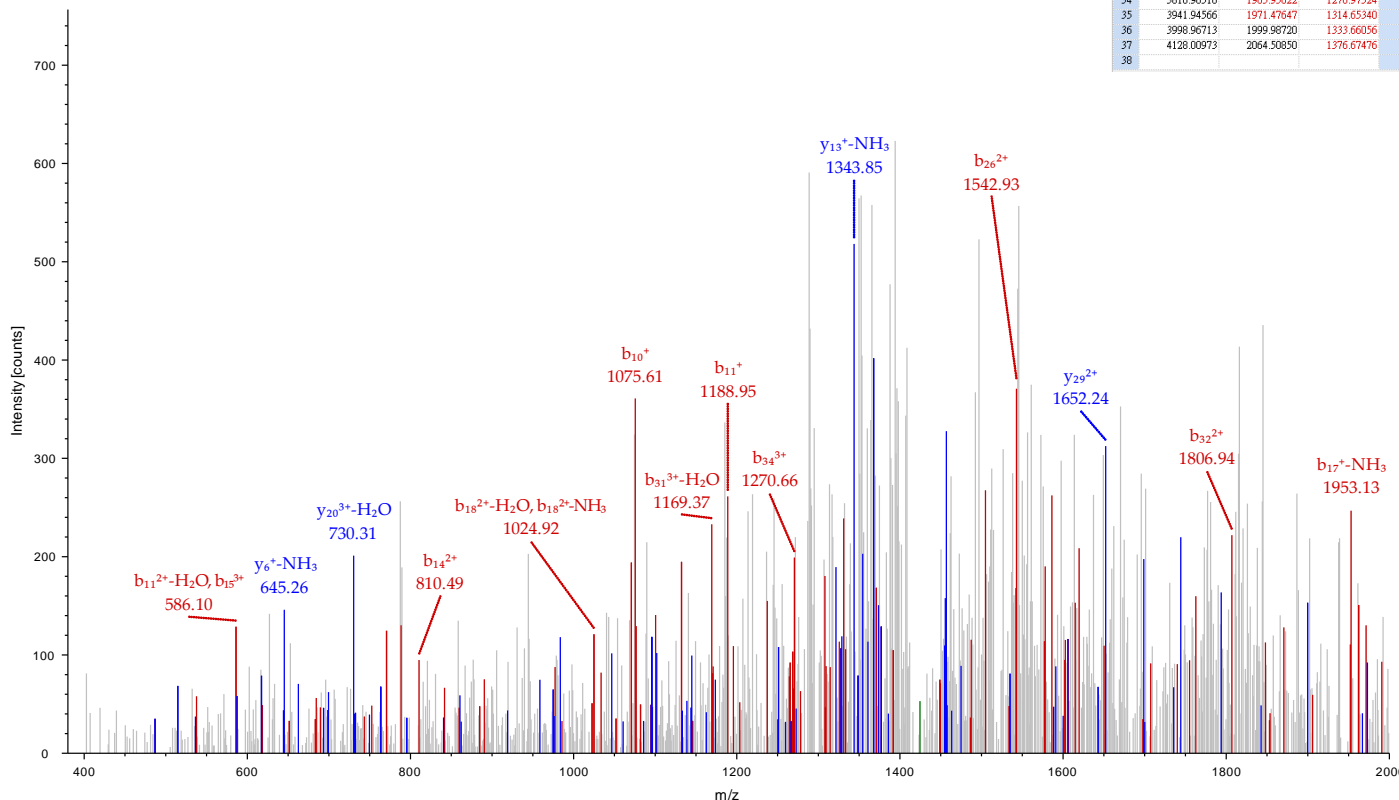



peg.1714 12465

| #1 | b <sup>+</sup> | b <sup>2+</sup> | Seq.     | y <sup>+</sup> | y <sup>2+</sup> | #2 |
|----|----------------|-----------------|----------|----------------|-----------------|----|
| 1  | 114.09135      | 57.54931        | L        |                |                 | 5  |
| 2  | 227.17542      | 114.09135       | I        | 543.38649      | 272.19688       | 4  |
| 3  | 397.28095      | 199.14411       | K-Acetyl | 430.30242      | 215.65485       | 3  |
| 4  | 510.36502      | 255.68615       | I        | 260.19688      | 130.60208       | 2  |
| 5  |                |                 | K        | 147.11281      | 74.06004        | 1  |

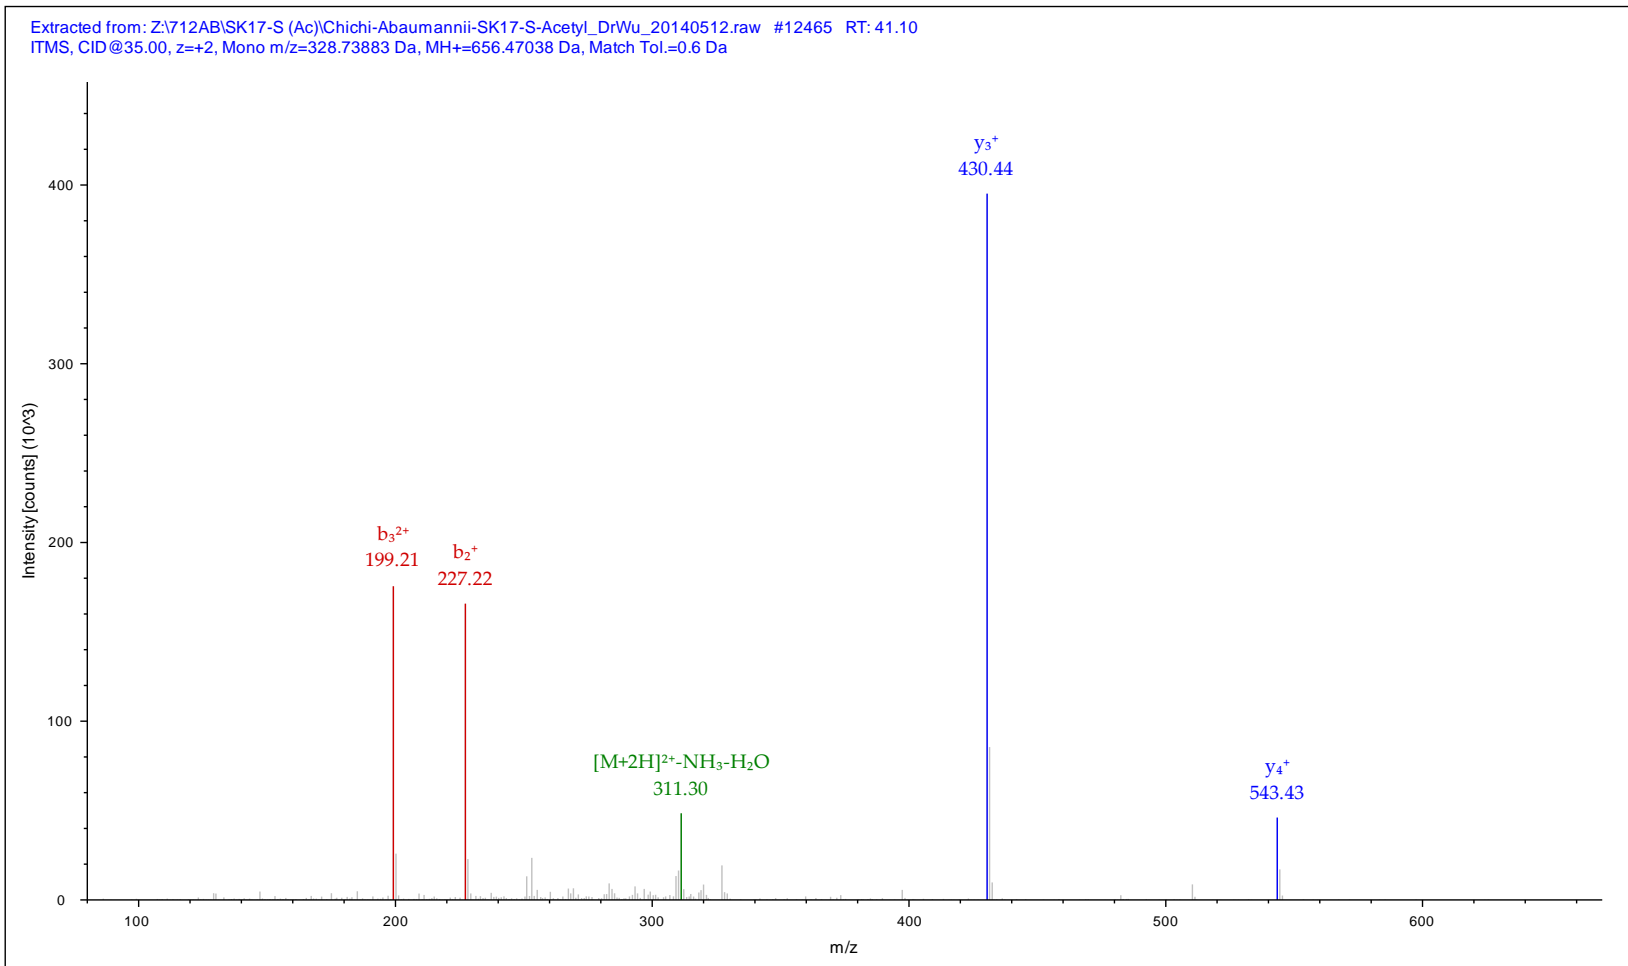

# peg.1733 19215

| #1 | b <sup>+</sup> | b <sup>2+</sup> | Seq.        | y <sup>+</sup> | y <sup>2+</sup> | #2 |
|----|----------------|-----------------|-------------|----------------|-----------------|----|
| 1  | 130.04987      | 65.52857        | S-Acetyl    |                |                 | 19 |
| 2  | 227.10264      | 114.05496       | P           | 1762.84633     | 881.92680       | 18 |
| 3  | 330.11183      | 165.55955       | C           | 1665.79356     | 833.40042       | 17 |
| 4  | 387.13330      | 194.07029       | G           | 1562.78437     | 781.89582       | 16 |
| 5  | 488.18098      | 244.59413       | T           | 1505.76290     | 753.38509       | 15 |
| 6  | 545.20245      | 273.10486       | G           | 1404.71522     | 702.86125       | 14 |
| 7  | 646.25013      | 323.62870       | T           | 1347.69375     | 674.35051       | 13 |
| 8  | 733.28216      | 367.14472       | S           | 1246.64607     | 623.82667       | 12 |
| 9  | 804.31928      | 402.66328       | A           | 1159.61404     | 580.31066       | 11 |
| 10 | 974.42482      | 487.71605       | K-Acetyl    | 1088.57692     | 544.79210       | 10 |
| 11 | 1087.50889     | 544.25808       | I           | 918.47139      | 459.73933       | 9  |
| 12 | 1158.54601     | 579.77664       | A           | 805.38732      | 403.19730       | 8  |
| 13 | 1318.57666     | 659.79197       | C-Carbam... | 734.35020      | 367.67874       | 7  |
| 14 | 1431.66073     | 716.33400       | L           | 574.31954      | 287.66341       | 6  |
| 15 | 1502.69785     | 751.85256       | A           | 461.23547      | 231.12137       | 5  |
| 16 | 1573.73497     | 787.37112       | A           | 390.19835      | 195.60281       | 4  |
| 17 | 1688.76192     | 844.88460       | D           | 319.16123      | 160.08425       | 3  |
| 18 | 1745.78339     | 873.39533       | G           | 204.13428      | 102.57078       | 2  |
| 19 |                |                 | K           | 147.11281      | 74.06004        | 1  |

Extracted from: Z:\712AB\SK17-S (Ac)\Chichi-Abaumannii-SK17-S-Acetyl\_DrWu\_20140703.raw #19215 RT: 53.35  
 ITMS, CID@35.00, z=+2, Mono m/z=946.44135 Da, MH+=1891.87541 Da, Match Tol.=0.6 Da

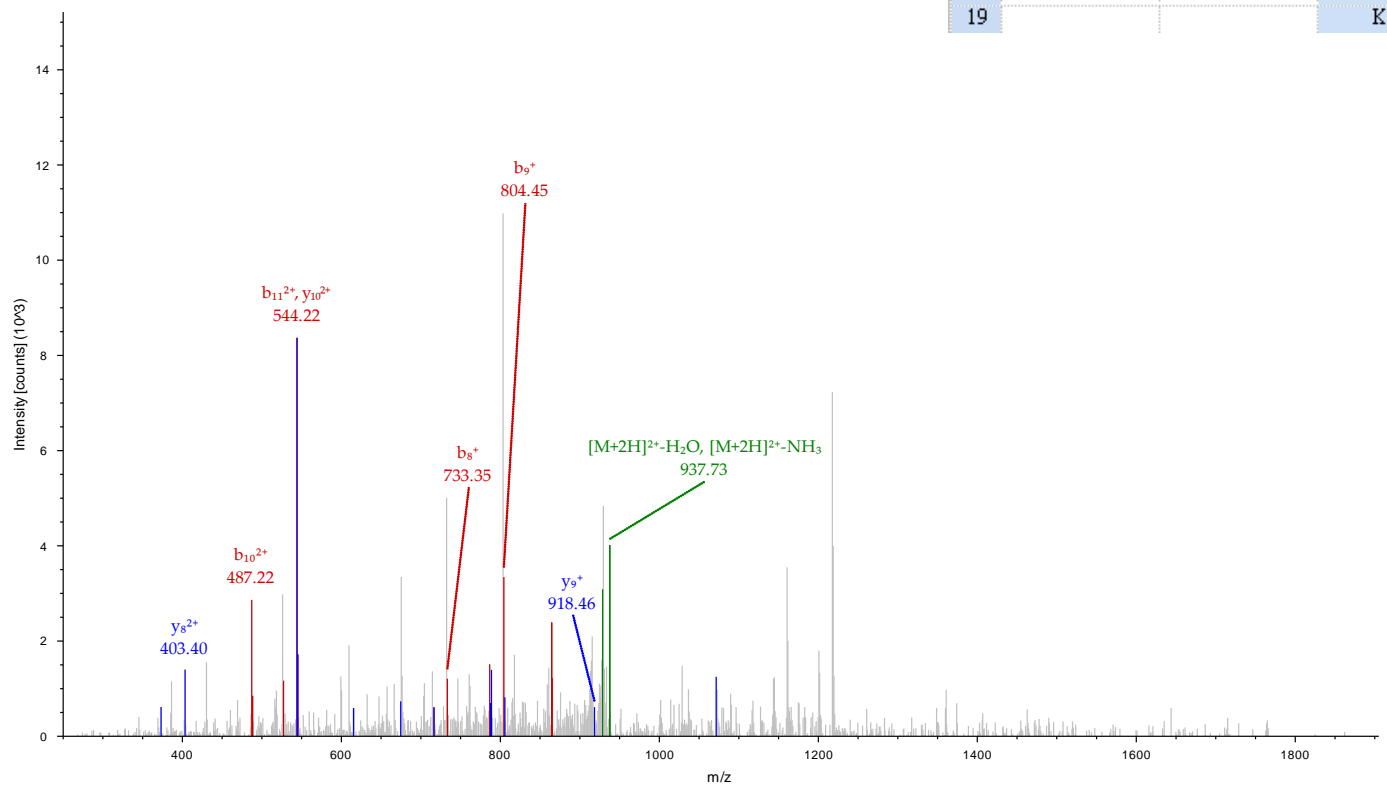

peg.1734 24326

| #1 | b <sup>+</sup> | b <sup>2+</sup> | Seq.     | y <sup>+</sup> | y <sup>2+</sup> | #2 |
|----|----------------|-----------------|----------|----------------|-----------------|----|
| 1  | 129.06586      | 65.03657        | Q        |                |                 | 16 |
| 2  | 244.09281      | 122.55004       | D        | 1771.01134     | 886.00931       | 15 |
| 3  | 373.13541      | 187.07134       | E        | 1655.98439     | 828.49583       | 14 |
| 4  | 486.21948      | 243.61338       | I        | 1526.94179     | 763.97453       | 13 |
| 5  | 557.25660      | 279.13194       | A        | 1413.85772     | 707.43250       | 12 |
| 6  | 727.36213      | 364.18470       | K-Acetyl | 1342.82060     | 671.91394       | 11 |
| 7  | 840.44620      | 420.72674       | L        | 1172.71506     | 586.86117       | 10 |
| 8  | 987.51462      | 494.26095       | F        | 1059.63099     | 530.31913       | 9  |
| 9  | 1101.55755     | 551.28241       | N        | 912.56257      | 456.78492       | 8  |
| 10 | 1200.62597     | 600.81662       | V        | 798.51964      | 399.76346       | 7  |
| 11 | 1287.65800     | 644.33264       | S        | 699.45122      | 350.22925       | 6  |
| 12 | 1415.75297     | 708.38012       | K        | 612.41919      | 306.71323       | 5  |
| 13 | 1528.83704     | 764.92216       | I        | 484.32422      | 242.66575       | 4  |
| 14 | 1625.88981     | 813.44854       | P        | 371.24015      | 186.12371       | 3  |
| 15 | 1724.95823     | 862.98275       | V        | 274.18738      | 137.59733       | 2  |
| 16 |                |                 | R        | 175.11896      | 88.06312        | 1  |

Extracted from: Z:\712AB\SK17-S (Ac)Chichi-Abaumannii-SK17-S-Acetyl\_DrWu\_20140703.raw #24326 RT: 66.46  
 ITMS, CID@35.00, z=+2, Mono m/z=950.04614 Da, MH+=1899.08501 Da, Match Tol.=0.6 Da

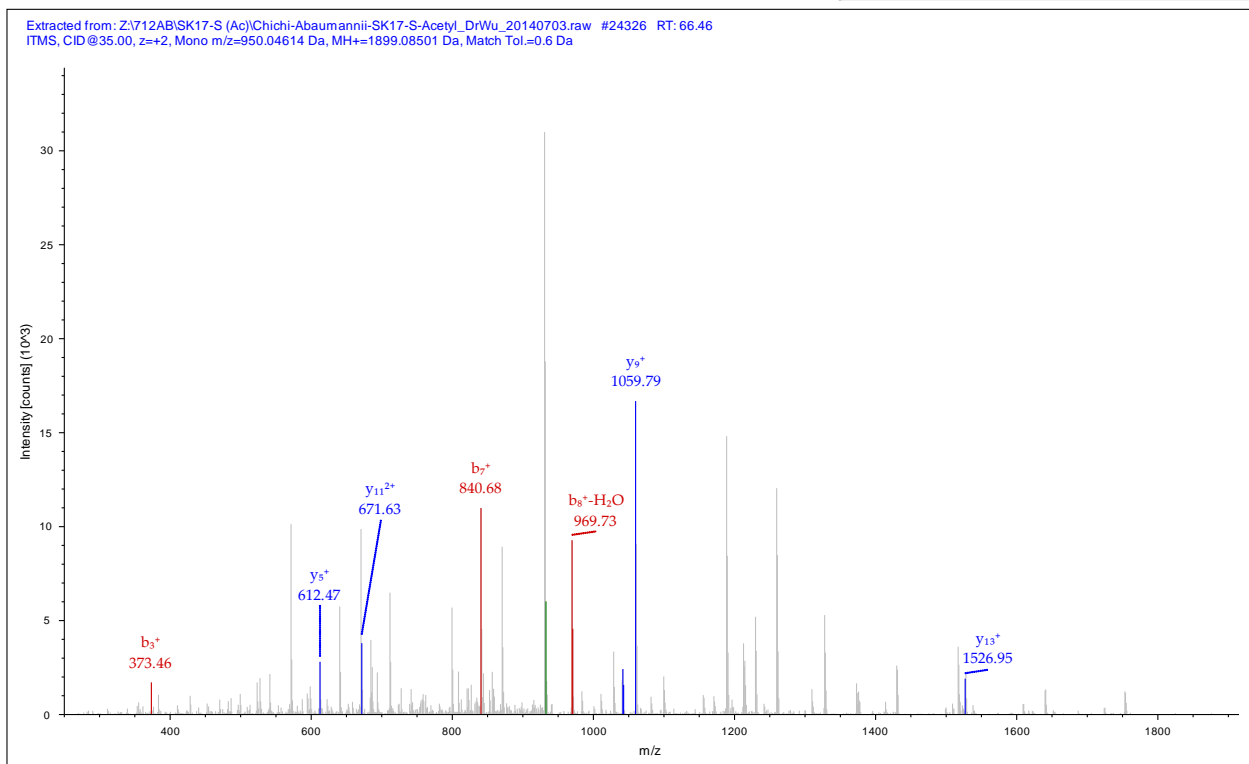

peg.1776 13276

| #1 | b <sup>+</sup> | b <sup>2+</sup> | Seq.     | y <sup>+</sup> | y <sup>2+</sup> | #2 |
|----|----------------|-----------------|----------|----------------|-----------------|----|
| 1  | 130.04987      | 65.52857        | S-Acetyl |                |                 | 14 |
| 2  | 300.15541      | 150.58134       | K-Acetyl | 1506.73950     | 753.87339       | 13 |
| 3  | 401.20309      | 201.10518       | T        | 1336.63396     | 668.82062       | 12 |
| 4  | 472.24021      | 236.62374       | A        | 1235.58628     | 618.29678       | 11 |
| 5  | 601.28281      | 301.14504       | E        | 1164.54916     | 582.77822       | 10 |
| 6  | 702.33049      | 351.66888       | T        | 1035.50656     | 518.25692       | 9  |
| 7  | 789.36252      | 395.18490       | S        | 934.45888      | 467.73308       | 8  |
| 8  | 876.39455      | 438.70091       | S        | 847.42685      | 424.21706       | 7  |
| 9  | 977.44223      | 489.22475       | T        | 760.39482      | 380.70105       | 6  |
| 10 | 1106.48483     | 553.74605       | E        | 659.34714      | 330.17721       | 5  |
| 11 | 1220.52776     | 610.76752       | N        | 530.30454      | 265.65591       | 4  |
| 12 | 1348.58634     | 674.79681       | Q        | 416.26161      | 208.63444       | 3  |
| 13 | 1461.67041     | 731.33884       | I        | 288.20303      | 144.60515       | 2  |
| 14 |                |                 | R        | 175.11896      | 88.06312        | 1  |

Extracted from: Z:\V12\AB\SK17-S (Ac)\Chichi-Abaumannii-SK17-S-Acetyl\_DrWu\_20140703.raw #13276 RT: 39.02  
 ITMS, CID@35.00, z=+2, Mono m/z=818.39264 Da, MH+=1635.77800 Da, Match Tol.=0.6 Da

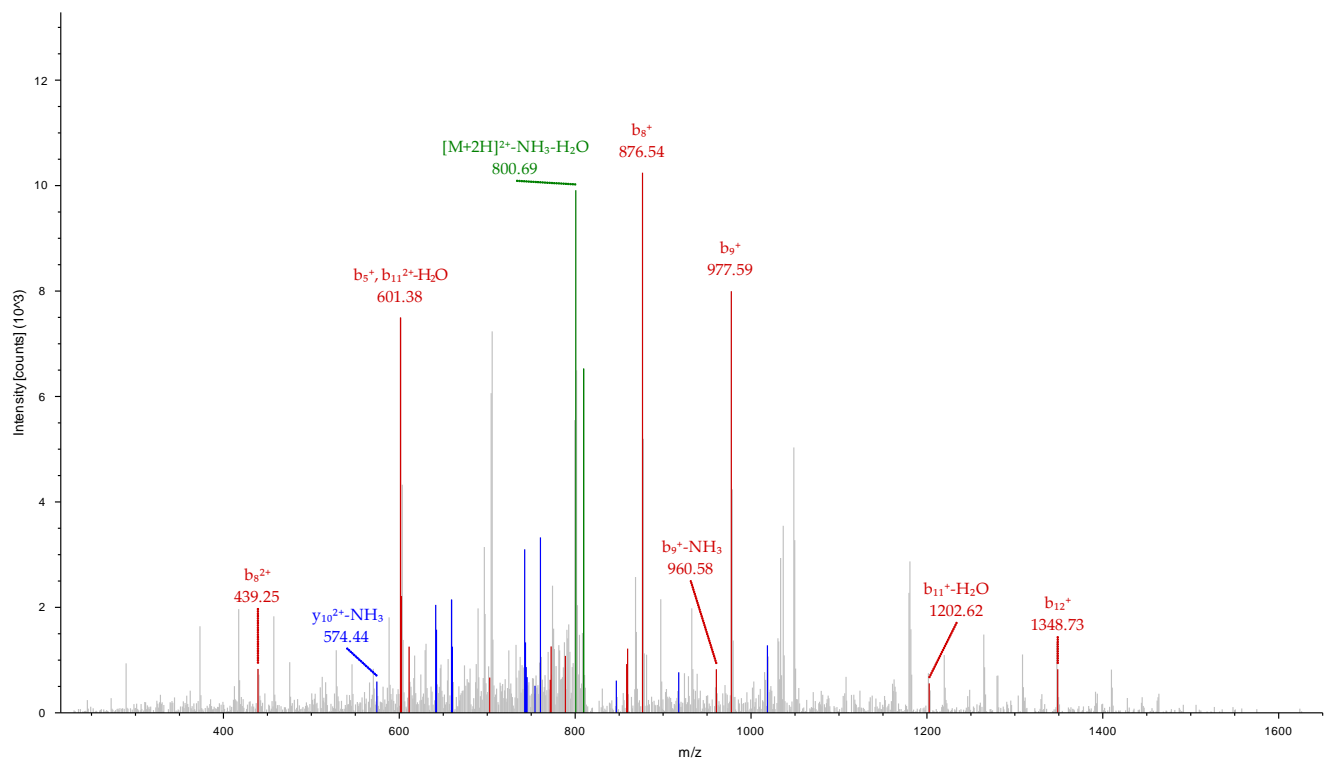

peg.1803 26971

| #1 | b <sup>+</sup> | b <sup>2+</sup> | b <sup>3+</sup> | Seq.     | y <sup>+</sup> | y <sup>2+</sup> | y <sup>3+</sup> | #2 |
|----|----------------|-----------------|-----------------|----------|----------------|-----------------|-----------------|----|
| 1  | 190.08626      | 95.54677        | 64.03360        | F-Acetyl |                |                 |                 | 20 |
| 2  | 247.10773      | 124.05750       | 83.04076        | G        | 1999.08193     | 1000.04460      | 667.03216       | 19 |
| 3  | 361.15066      | 181.07897       | 121.05507       | N        | 1942.06046     | 971.53387       | 648.02500       | 18 |
| 4  | 489.24563      | 245.12645       | 163.75339       | K        | 1828.01753     | 914.51240       | 610.01069       | 17 |
| 5  | 588.31405      | 294.66066       | 196.77620       | V        | 1699.92256     | 850.46492       | 567.31237       | 16 |
| 6  | 675.34608      | 338.17668       | 225.78688       | S        | 1600.85414     | 800.93071       | 534.28956       | 15 |
| 7  | 772.39885      | 386.70306       | 258.13780       | P        | 1513.82211     | 757.41469       | 505.27889       | 14 |
| 8  | 871.46727      | 436.23727       | 291.16061       | V        | 1416.76934     | 708.88831       | 472.92796       | 13 |
| 9  | 928.48874      | 464.74801       | 310.16776       | G        | 1317.70092     | 659.35410       | 439.90516       | 12 |
| 10 | 1056.54732     | 528.77730       | 352.85396       | Q        | 1260.67945     | 630.84336       | 420.89800       | 11 |
| 11 | 1157.59500     | 579.30114       | 386.53652       | T        | 1132.62087     | 566.81407       | 378.21181       | 10 |
| 12 | 1327.70054     | 664.35391       | 443.23836       | K-Acetyl | 1031.57319     | 516.29023       | 344.52925       | 9  |
| 13 | 1428.74822     | 714.87775       | 476.92092       | T        | 861.46765      | 431.23746       | 287.82740       | 8  |
| 14 | 1541.83229     | 771.41978       | 514.61561       | L        | 760.41997      | 380.71362       | 254.14484       | 7  |
| 15 | 1638.88506     | 819.94617       | 546.96654       | P        | 647.33590      | 324.17159       | 216.45015       | 6  |
| 16 | 1739.93274     | 870.47001       | 580.64910       | T        | 550.28313      | 275.64520       | 184.09923       | 5  |
| 17 | 1826.96477     | 913.98602       | 609.65977       | S        | 449.23545      | 225.12136       | 150.41667       | 4  |
| 18 | 1928.01245     | 964.50986       | 643.34233       | T        | 362.20342      | 181.60535       | 121.40599       | 3  |
| 19 | 2042.05538     | 1021.53133      | 681.35664       | N        | 261.15574      | 131.08151       | 87.72343        | 2  |
| 20 |                |                 |                 | K        | 147.11281      | 74.06004        | 49.70912        | 1  |

Extracted from: Z:\712ABISK17-S (Ac)\Chichi-Abaumannii-SK17-S-Acetyl\_DrWu\_20140512.raw #26971 RT: 81.65  
 ITMS, CID@35.00, z=+3, Mono m/z=730.06219 Da, MH+=2188.17203 Da, Match Tol.=0.6 Da

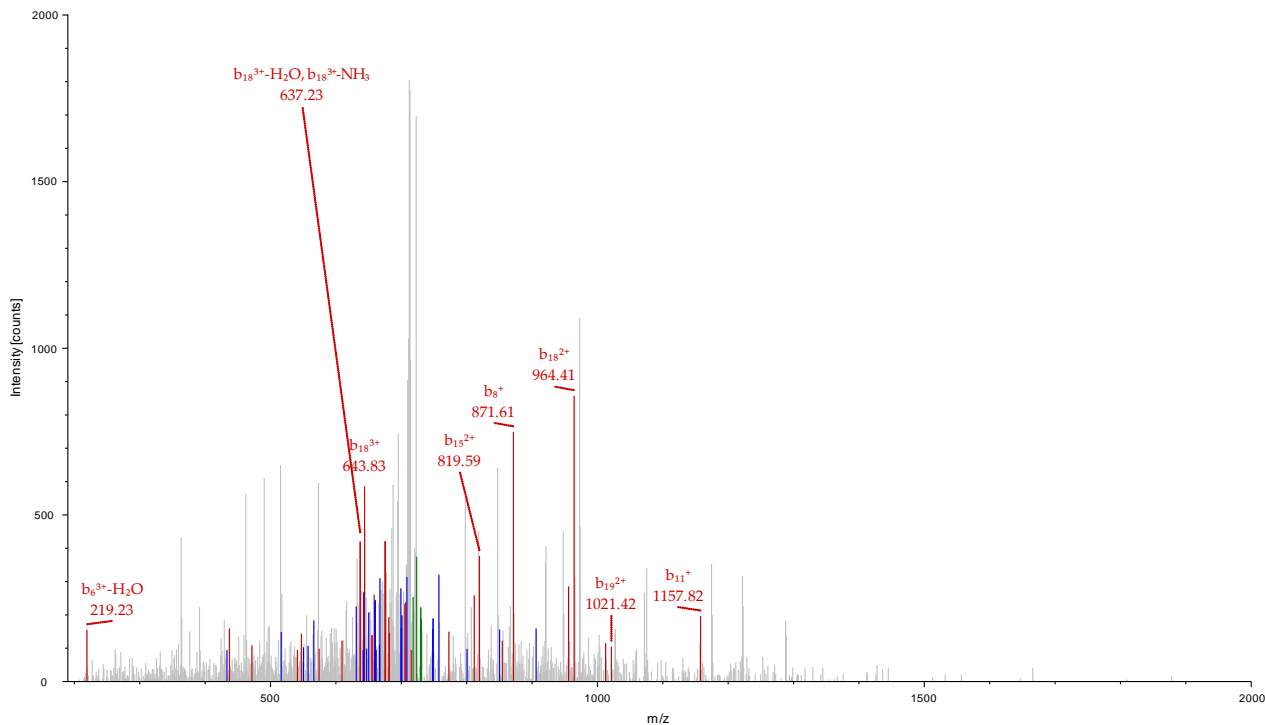

peg.1811 24884

| #1 | b <sup>+</sup> | b <sup>2+</sup> | Seq.     | y <sup>+</sup> | y <sup>2+</sup> | #2 |
|----|----------------|-----------------|----------|----------------|-----------------|----|
| 1  | 114.05496      | 57.53112        | A-Acetyl |                |                 | 16 |
| 2  | 213.12338      | 107.06533       | V        | 1658.93241     | 829.96984       | 15 |
| 3  | 300.15541      | 150.58134       | S        | 1559.86399     | 780.43563       | 14 |
| 4  | 401.20309      | 201.10518       | T        | 1472.83196     | 736.91962       | 13 |
| 5  | 529.29806      | 265.15267       | K        | 1371.78428     | 686.39578       | 12 |
| 6  | 600.33518      | 300.67123       | A        | 1243.68931     | 622.34829       | 11 |
| 7  | 701.38286      | 351.19507       | T        | 1172.65219     | 586.82973       | 10 |
| 8  | 829.44144      | 415.22436       | Q        | 1071.60451     | 536.30589       | 9  |
| 9  | 928.50986      | 464.75857       | V        | 943.54593      | 472.27660       | 8  |
| 10 | 1098.61540     | 549.81134       | K-Acetyl | 844.47751      | 422.74239       | 7  |
| 11 | 1227.65800     | 614.33264       | E        | 674.37197      | 337.68962       | 6  |
| 12 | 1326.72642     | 663.86685       | V        | 545.32937      | 273.16832       | 5  |
| 13 | 1425.79484     | 713.40106       | V        | 446.26095      | 223.63411       | 4  |
| 14 | 1496.83196     | 748.91962       | A        | 347.19253      | 174.09990       | 3  |
| 15 | 1625.87456     | 813.44092       | E        | 276.15541      | 138.58134       | 2  |
| 16 |                |                 | K        | 147.11281      | 74.06004        | 1  |

Extracted from: Z:\712AB\SK17-S (Ac)\Chichi-Abaumanni-SK17-S-Acetyl\_DrWu\_20140703.raw #24884 RT: 67.98  
 ITMS, CID@35.00, z=+2, Mono m/z=886.49872 Da, MH+=1771.99016 Da, Match Tol.=0.6 Da

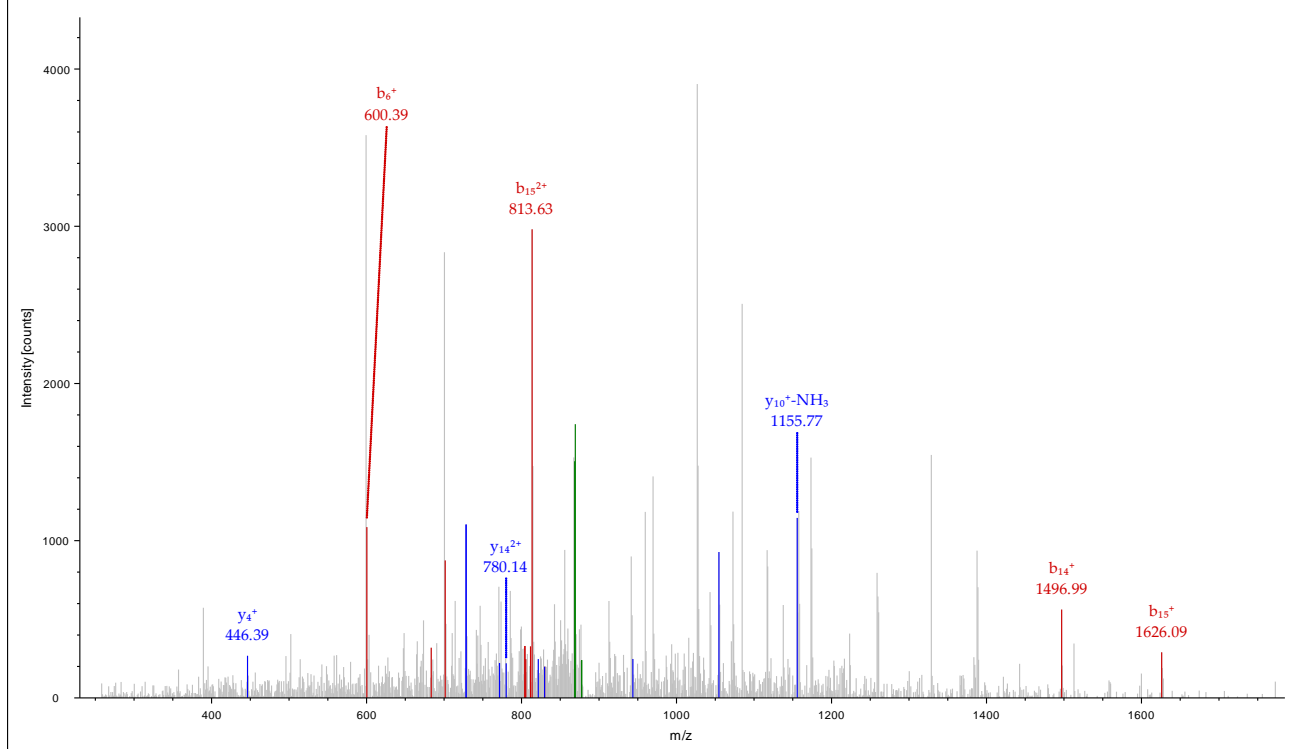

peg.1833 23498

| #1 | b <sup>+</sup> | b <sup>2+</sup> | Seq.     | y <sup>+</sup> | y <sup>2+</sup> | #2 |
|----|----------------|-----------------|----------|----------------|-----------------|----|
| 1  | 114.05496      | 57.53112        | A-Acetyl |                |                 | 17 |
| 2  | 201.08699      | 101.04713       | S        | 1906.99169     | 953.99948       | 16 |
| 3  | 316.11394      | 158.56061       | D        | 1819.95966     | 910.48347       | 15 |
| 4  | 413.16671      | 207.08699       | P        | 1704.93271     | 852.96999       | 14 |
| 5  | 542.20931      | 271.60829       | E        | 1607.87994     | 804.44361       | 13 |
| 6  | 613.24643      | 307.12685       | A        | 1478.83734     | 739.92231       | 12 |
| 7  | 783.35197      | 392.17962       | K-Acetyl | 1407.80022     | 704.40375       | 11 |
| 8  | 896.43604      | 448.72166       | L        | 1237.69468     | 619.35098       | 10 |
| 9  | 1052.53716     | 526.77222       | R        | 1124.61061     | 562.80894       | 9  |
| 10 | 1166.58009     | 583.79368       | N        | 968.50949      | 484.75838       | 8  |
| 11 | 1294.63867     | 647.82297       | Q        | 854.46656      | 427.73692       | 7  |
| 12 | 1365.67579     | 683.34153       | A        | 726.40798      | 363.70763       | 6  |
| 13 | 1464.74421     | 732.87574       | V        | 655.37086      | 328.18907       | 5  |
| 14 | 1601.80312     | 801.40520       | H        | 556.30244      | 278.65486       | 4  |
| 15 | 1714.88719     | 857.94723       | L        | 419.24353      | 210.12540       | 3  |
| 16 | 1845.92769     | 923.46748       | M        | 306.15946      | 153.58337       | 2  |
| 17 |                |                 | R        | 175.11896      | 88.06312        | 1  |

Extracted from: Z:\712AB\SK17-S (Ac)\Chichi-Abaumannii-SK17-S-Acetyl\_DrWu\_20140512.raw #23498 RT: 70.92  
ITMS, CID@35.00, z=+2, Mono m/z=1010.52740 Da, MH+=2020.04753 Da, Match Tol.=0.6 Da

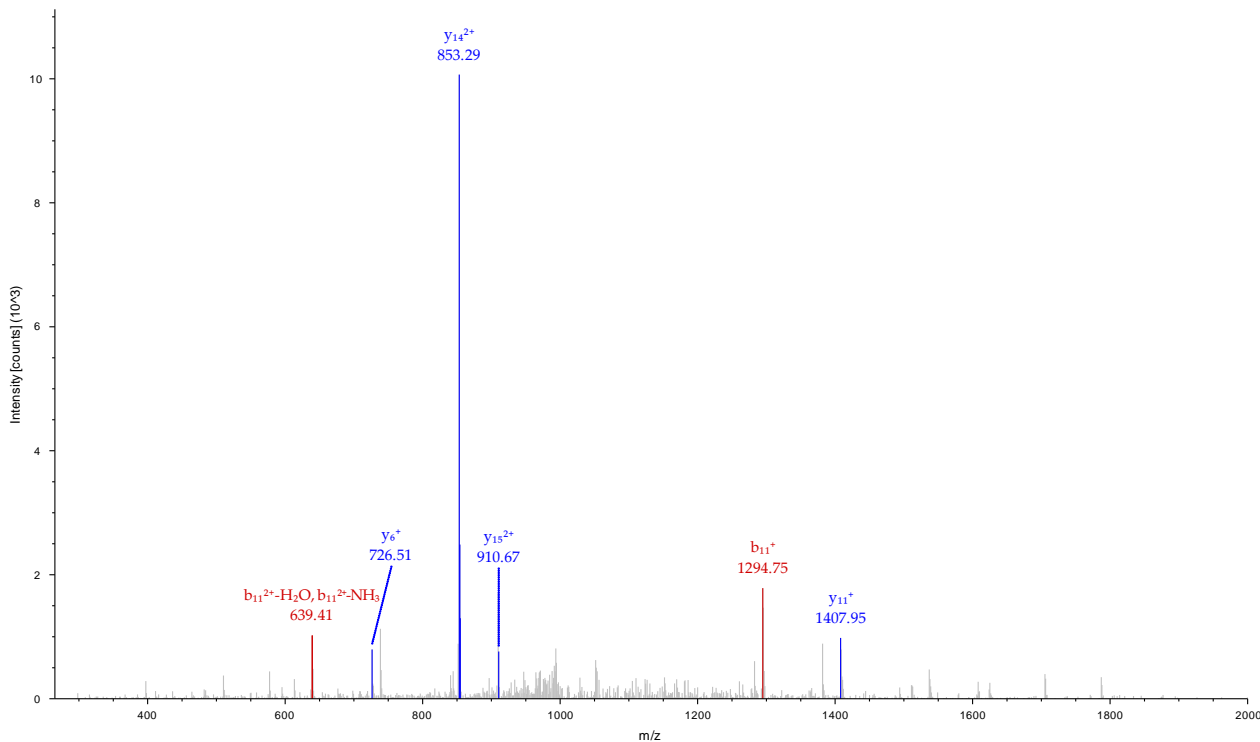

peg.1836

25733

| #1 | b <sup>+</sup> | b <sup>2+</sup> | b <sup>3+</sup> | Seq.     | y <sup>+</sup> | y <sup>2+</sup> | y <sup>3+</sup> | #2 |
|----|----------------|-----------------|-----------------|----------|----------------|-----------------|-----------------|----|
| 1  | 174.05834      | 87.53281        | 58.69096        | M-Acetyl |                |                 |                 | 33 |
| 2  | 261.09037      | 131.04882       | 87.70164        | S        | 3556.77037     | 1778.88882      | 1186.26164      | 32 |
| 3  | 389.18534      | 195.09631       | 130.39996       | K        | 3469.73834     | 1735.37281      | 1157.25096      | 31 |
| 4  | 502.26941      | 251.63834       | 168.09465       | I        | 3341.64337     | 1671.32532      | 1114.55264      | 30 |
| 5  | 615.35348      | 308.18038       | 205.78934       | I        | 3228.55930     | 1614.78329      | 1076.85795      | 29 |
| 6  | 686.39060      | 343.69894       | 229.46838       | A        | 3115.47523     | 1558.24125      | 1039.16326      | 28 |
| 7  | 789.39979      | 395.20353       | 263.80478       | C        | 3044.43811     | 1522.72269      | 1015.48422      | 27 |
| 8  | 902.48386      | 451.74557       | 301.49947       | I        | 2941.42892     | 1471.21810      | 981.14782       | 26 |
| 9  | 1017.51081     | 509.25904       | 339.84179       | D        | 2828.34485     | 1414.67606      | 943.45313       | 25 |
| 10 | 1074.53228     | 537.76978       | 358.84894       | G        | 2713.31790     | 1357.16259      | 905.11082       | 24 |
| 11 | 1161.56431     | 581.28579       | 387.85962       | S        | 2656.29643     | 1328.65185      | 886.10366       | 23 |
| 12 | 1274.64838     | 637.82783       | 425.55431       | L        | 2569.26440     | 1285.13584      | 857.09298       | 22 |
| 13 | 1373.71680     | 687.36204       | 458.57712       | V        | 2456.18033     | 1228.59380      | 819.39829       | 21 |
| 14 | 1474.76448     | 737.88588       | 492.25968       | T        | 2357.11191     | 1179.05959      | 786.37549       | 20 |
| 15 | 1588.80741     | 794.90734       | 530.27399       | N        | 2256.06423     | 1128.53575      | 752.69293       | 19 |
| 16 | 1689.85509     | 845.43118       | 563.95655       | T        | 2142.02130     | 1071.51429      | 714.67862       | 18 |
| 17 | 1788.92351     | 894.96539       | 596.97935       | V        | 2040.97362     | 1020.99045      | 680.99606       | 17 |
| 18 | 1891.93270     | 946.46999       | 631.31575       | C        | 1941.90520     | 971.45624       | 647.97325       | 16 |
| 19 | 2006.95965     | 1003.98346      | 669.65807       | D        | 1838.89601     | 919.95164       | 613.63685       | 15 |
| 20 | 2170.02297     | 1085.51512      | 724.01251       | Y        | 1723.86906     | 862.43817       | 575.29454       | 14 |
| 21 | 2241.06009     | 1121.03368      | 747.69155       | A        | 1560.80574     | 780.90651       | 520.94010       | 13 |
| 22 | 2312.09721     | 1156.55224      | 771.37059       | A        | 1489.76862     | 745.38795       | 497.26106       | 12 |
| 23 | 2498.17653     | 1249.59190      | 833.39703       | W        | 1418.73150     | 709.86939       | 473.58202       | 11 |
| 24 | 2645.24495     | 1323.12611      | 882.41983       | F        | 1232.65218     | 616.82973       | 411.55558       | 10 |
| 25 | 2732.27698     | 1366.64213      | 911.43051       | S        | 1085.58376     | 543.29552       | 362.53277       | 9  |
| 26 | 2847.30393     | 1424.15560      | 949.77283       | D        | 998.55173      | 499.77950       | 333.52209       | 8  |
| 27 | 3017.40947     | 1509.20837      | 1006.47467      | K-Acetyl | 883.52478      | 442.26603       | 295.17978       | 7  |
| 28 | 3130.49354     | 1565.75041      | 1044.16936      | L        | 713.41925      | 357.21326       | 238.47793       | 6  |
| 29 | 3244.53647     | 1622.77187      | 1082.18367      | N        | 600.33518      | 300.67123       | 200.78324       | 5  |
| 30 | 3331.56850     | 1666.28789      | 1111.19435      | S        | 486.29225      | 243.64976       | 162.76893       | 4  |
| 31 | 3428.62127     | 1714.81427      | 1143.54527      | P        | 399.26022      | 200.13375       | 133.75826       | 3  |
| 32 | 3541.70534     | 1771.35631      | 1181.23996      | I        | 302.20745      | 151.60736       | 101.40733       | 2  |
| 33 |                |                 |                 | K-Acetyl | 189.12338      | 95.06533        | 63.71264        | 1  |

Extracted from: Z:\712AB\SK17-S (Ac)\Chichi-Abaumannii-SK17-S-Acetyl\_DrWu\_20140512.raw #25733 RT: 77.75  
 ITMS, CID@35.00, z=+3, Mono m/z=1243.95654 Da, MH+=3729.85508 Da, Match Tol.=0.6 Da

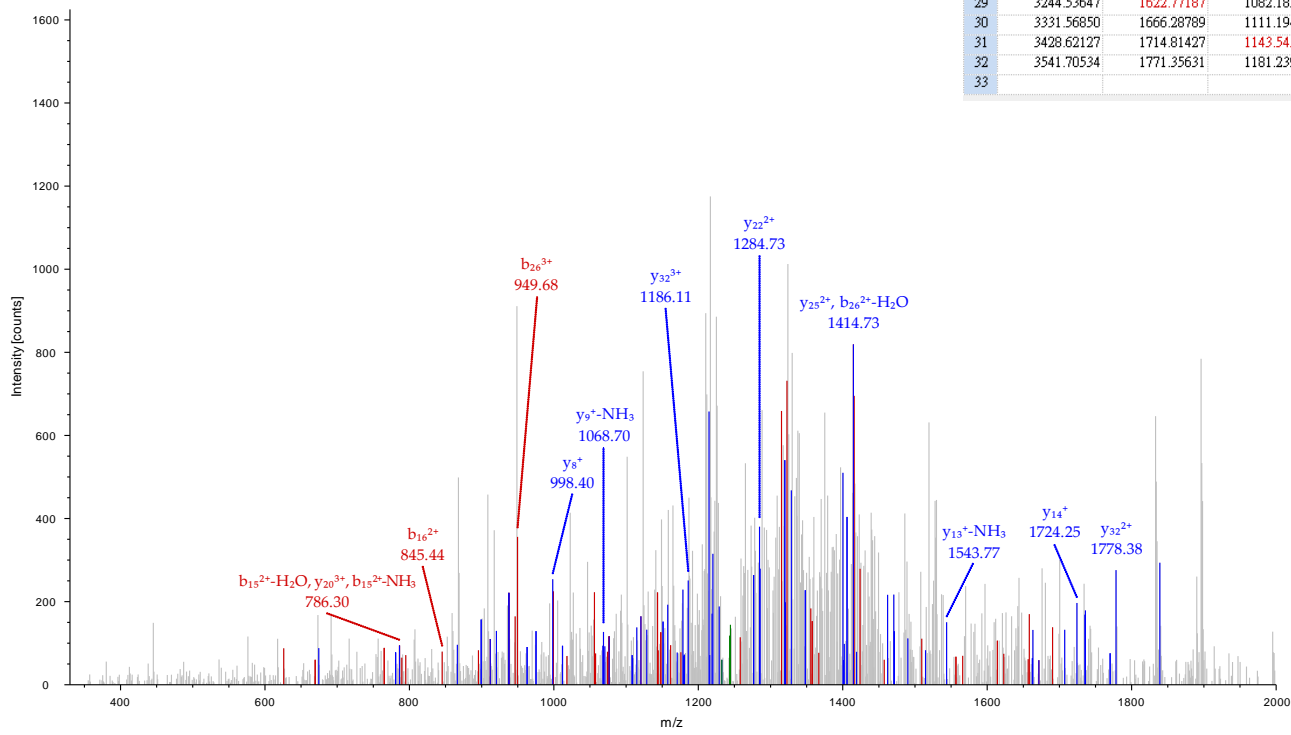



# peg.1837 21969

| #1 | b <sup>+</sup> | b <sup>2+</sup> | b <sup>3+</sup> | Seq.     | y <sup>+</sup> | y <sup>2+</sup> | y <sup>3+</sup> | #2 |
|----|----------------|-----------------|-----------------|----------|----------------|-----------------|-----------------|----|
| 1  | 172.06044      | 86.53386        | 58.02500        | E-Acetyl |                |                 |                 | 36 |
| 2  | 275.06963      | 138.03845       | 92.36139        | C        | 3422.68019     | 1711.84373      | 1141.56491      | 35 |
| 3  | 445.17517      | 223.09122       | 149.06324       | K-Acetyl | 3319.67100     | 1660.33914      | 1107.22852      | 34 |
| 4  | 502.19664      | 251.60196       | 168.07040       | G        | 3149.56547     | 1575.28637      | 1050.52667      | 33 |
| 5  | 630.25522      | 315.63125       | 210.75659       | Q        | 3092.54400     | 1546.77564      | 1031.51952      | 32 |
| 6  | 687.27669      | 344.14198       | 229.76375       | G        | 2964.48542     | 1482.74635      | 988.83332       | 31 |
| 7  | 786.34511      | 393.67619       | 262.78655       | V        | 2907.46395     | 1454.23561      | 969.82617       | 30 |
| 8  | 857.38223      | 429.19475       | 286.46559       | A        | 2808.39553     | 1404.70140      | 936.80336       | 29 |
| 9  | 971.42516      | 486.21622       | 324.47990       | N        | 2737.35841     | 1369.18284      | 913.12432       | 28 |
| 10 | 1070.49358     | 535.75043       | 357.50271       | V        | 2623.31548     | 1312.16138      | 875.11001       | 27 |
| 11 | 1141.53070     | 571.26899       | 381.18175       | A        | 2524.24706     | 1262.62717      | 842.08720       | 26 |
| 12 | 1228.56273     | 614.78500       | 410.19243       | S        | 2453.20994     | 1227.10861      | 818.40816       | 25 |
| 13 | 1285.58420     | 643.29574       | 429.19958       | G        | 2366.17791     | 1183.59259      | 789.39749       | 24 |
| 14 | 1432.65262     | 716.82995       | 478.22239       | F        | 2309.15644     | 1155.08186      | 770.39033       | 23 |
| 15 | 1545.73669     | 773.37198       | 515.91708       | L        | 2162.08802     | 1081.54765      | 721.36752       | 22 |
| 16 | 1602.75816     | 801.88272       | 534.92424       | G        | 2049.00395     | 1025.00561      | 683.67283       | 21 |
| 17 | 1659.77963     | 830.39345       | 553.93139       | G        | 1991.98248     | 996.49488       | 664.66568       | 20 |
| 18 | 1790.82013     | 895.91370       | 597.61156       | M        | 1934.96101     | 967.98414       | 645.65852       | 19 |
| 19 | 1861.85725     | 931.43226       | 621.29060       | A        | 1803.92051     | 902.46389       | 601.97835       | 18 |
| 20 | 1918.87872     | 959.94300       | 640.29776       | G        | 1732.88339     | 866.94533       | 578.29931       | 17 |
| 21 | 2021.88791     | 1011.44759      | 674.63415       | C        | 1675.86192     | 838.43460       | 559.29216       | 16 |
| 22 | 2092.92503     | 1046.96615      | 698.31319       | A        | 1572.85273     | 786.93000       | 524.95576       | 15 |
| 23 | 2223.96553     | 1112.48640      | 741.99336       | M        | 1501.81561     | 751.41144       | 501.27672       | 14 |
| 24 | 2337.04960     | 1169.02844      | 779.68805       | I        | 1370.77511     | 685.89119       | 457.59655       | 13 |
| 25 | 2394.07107     | 1197.53917      | 798.69521       | G        | 1257.69104     | 629.34916       | 419.90186       | 12 |
| 26 | 2522.12965     | 1261.56846      | 841.38140       | Q        | 1200.66957     | 600.83842       | 400.89471       | 11 |
| 27 | 2609.16168     | 1305.08448      | 870.39208       | S        | 1072.61099     | 536.80913       | 358.20851       | 10 |
| 28 | 2722.24575     | 1361.62651      | 908.08677       | I        | 985.57896      | 493.29312       | 329.19784       | 9  |
| 29 | 2835.32982     | 1418.16855      | 945.78146       | I        | 872.49489      | 436.75108       | 291.50315       | 8  |
| 30 | 2949.37275     | 1475.19001      | 983.79577       | N        | 759.41082      | 380.20905       | 253.80846       | 7  |
| 31 | 3048.44117     | 1524.72422      | 1016.81857      | V        | 645.36789      | 323.18758       | 215.79415       | 6  |
| 32 | 3218.54670     | 1609.77699      | 1073.52042      | K-Acetyl | 546.29947      | 273.65337       | 182.77134       | 5  |
| 33 | 3305.57873     | 1653.29300      | 1102.53109      | S        | 376.19393      | 188.60060       | 126.06949       | 4  |
| 34 | 3362.60020     | 1681.80374      | 1121.53825      | G        | 289.16190      | 145.08459       | 97.05882        | 3  |
| 35 | 3419.62167     | 1710.31447      | 1140.54541      | G        | 232.14043      | 116.57385       | 78.05166        | 2  |
| 36 |                |                 |                 | R        | 175.11896      | 88.06312        | 59.04450        | 1  |

Extracted from: Z:\712AB\SK17-S (Ac)\Chichi-Abaumannii-SK17-S-Acetyl\_DrWu\_20140512.raw #21969 RT: 66.39  
 ITMS, CID@35.00, z=+3, Mono m/z=1198.58850 Da, MH+=3593.75095 Da, Match Tol.=0.6 Da

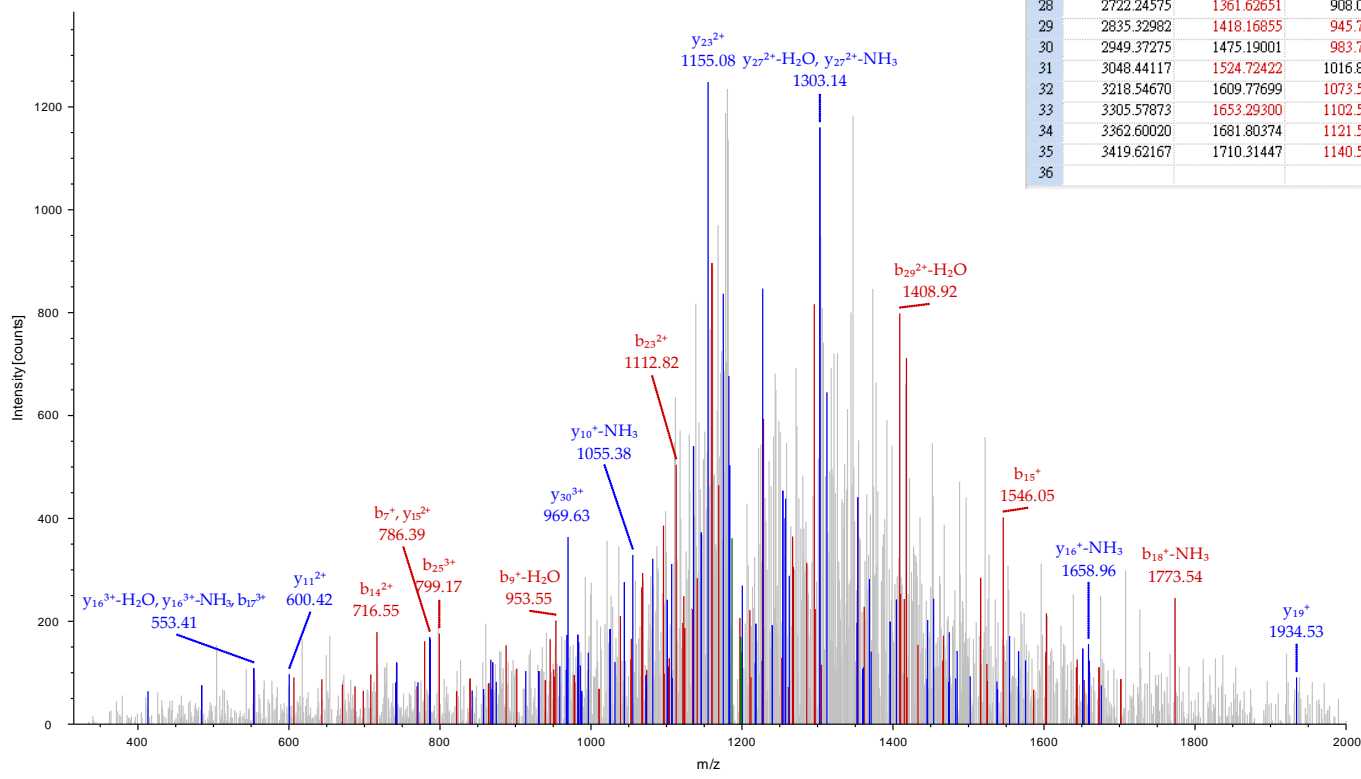

peg.1846 19805

| #1 | b <sup>+</sup> | b <sup>2+</sup> | b <sup>3+</sup> | Seq.     | y <sup>+</sup> | y <sup>2+</sup> | y <sup>3+</sup> | #2 |
|----|----------------|-----------------|-----------------|----------|----------------|-----------------|-----------------|----|
| 1  | 156.10191      | 78.55459        | 52.70549        | L-Acetyl |                |                 |                 | 19 |
| 2  | 303.17033      | 152.08880       | 101.72829       | F        | 2468.17315     | 1234.59021      | 823.39590       | 18 |
| 3  | 434.21083      | 217.60905       | 145.40846       | M        | 2321.10473     | 1161.05600      | 774.37309       | 17 |
| 4  | 547.29490      | 274.15109       | 183.10315       | L        | 2190.06423     | 1095.53575      | 730.69293       | 16 |
| 5  | 694.36332      | 347.68530       | 232.12596       | F        | 2076.98016     | 1038.99372      | 692.99824       | 15 |
| 6  | 864.46886      | 432.73807       | 288.82780       | K-Acetyl | 1929.91174     | 965.45951       | 643.97543       | 14 |
| 7  | 965.51654      | 483.26191       | 322.51036       | T        | 1759.80620     | 880.40674       | 587.27358       | 13 |
| 8  | 1080.54349     | 540.77538       | 360.85268       | D        | 1658.75852     | 829.88290       | 553.59102       | 12 |
| 9  | 1209.58609     | 605.29668       | 403.86688       | E        | 1543.73157     | 772.36942       | 515.24871       | 11 |
| 10 | 1356.65451     | 678.83089       | 452.88969       | F        | 1414.68897     | 707.84812       | 472.23451       | 10 |
| 11 | 1471.68146     | 736.34437       | 491.23200       | D        | 1267.62055     | 634.31391       | 423.21170       | 9  |
| 12 | 1584.76553     | 792.88640       | 528.92669       | I        | 1152.59360     | 576.80044       | 384.86938       | 8  |
| 13 | 1713.80813     | 857.40770       | 571.94089       | E        | 1039.50953     | 520.25840       | 347.17469       | 7  |
| 14 | 1883.91366     | 942.46047       | 628.64274       | K-Acetyl | 910.46693      | 455.73710       | 304.16049       | 6  |
| 15 | 2011.97224     | 1006.48976      | 671.32893       | Q        | 740.36140      | 370.68434       | 247.45865       | 5  |
| 16 | 2141.01484     | 1071.01106      | 714.34313       | E        | 612.30282      | 306.65505       | 204.77246       | 4  |
| 17 | 2288.08326     | 1144.54527      | 763.36594       | F        | 483.26022      | 242.13375       | 161.75826       | 3  |
| 18 | 2435.15168     | 1218.07948      | 812.38874       | F        | 336.19180      | 168.59954       | 112.73545       | 2  |
| 19 |                |                 |                 | K-Acetyl | 189.12338      | 95.06533        | 63.71264        | 1  |

Extracted from: Z:\712AB\SK17-S (Ac)\Chichi-Abaumannii-SK17-S-Acetyl\_L\_DrWu\_20140512.raw #19805 RT: 60.29  
 TMS, CID@35.00, z=+3, Mono m/z=875.09454 Da, MH+=2623.26908 Da, Match Tol.=0.6 Da

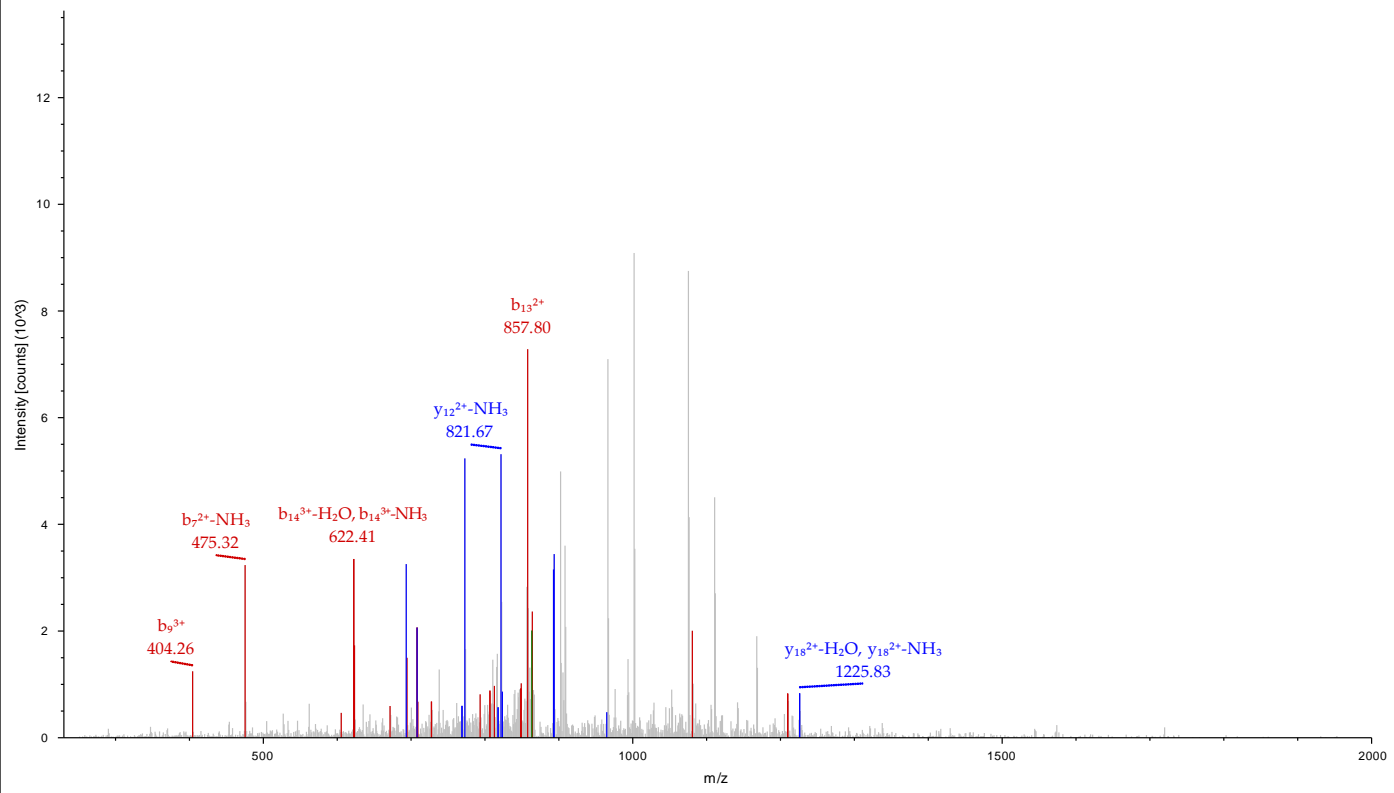

peg.1865 15269

| #1 | b <sup>+</sup> | b <sup>2+</sup> | Seq.     | y <sup>+</sup> | y <sup>2+</sup> | #2 |
|----|----------------|-----------------|----------|----------------|-----------------|----|
| 1  | 72.04440       | 36.52584        | A        |                |                 | 14 |
| 2  | 129.06587      | 65.03657        | G        | 1378.69620     | 689.85174       | 13 |
| 3  | 244.09282      | 122.55005       | D        | 1321.67473     | 661.34100       | 12 |
| 4  | 373.13542      | 187.07135       | E        | 1206.64778     | 603.82753       | 11 |
| 5  | 430.15689      | 215.58208       | G        | 1077.60518     | 539.30623       | 10 |
| 6  | 600.26242      | 300.63485       | K-Acetyl | 1020.58371     | 510.79549       | 9  |
| 7  | 713.34649      | 357.17688       | L        | 850.47817      | 425.74272       | 8  |
| 8  | 860.41491      | 430.71109       | F        | 737.39410      | 369.20069       | 7  |
| 9  | 917.43638      | 459.22183       | G        | 590.32568      | 295.66648       | 6  |
| 10 | 1004.46841     | 502.73784       | S        | 533.30421      | 267.15574       | 5  |
| 11 | 1117.55248     | 559.27988       | I        | 446.27218      | 223.63973       | 4  |
| 12 | 1174.57395     | 587.79061       | G        | 333.18811      | 167.09769       | 3  |
| 13 | 1275.62163     | 638.31445       | T        | 276.16664      | 138.58696       | 2  |
| 14 |                |                 | R        | 175.11896      | 88.06312        | 1  |

Extracted from: Z:\712AB\SK17-S (Ac)\Chichi-Abaumannii-SK17-R-Acetyl\_DrWu\_20140512.raw #15269 RT: 43.80  
 ITMS, CID@35.00, z=+2, Mono m/z=725.36957 Da, MH+=1449.73186 Da, Match Tol.=0.6 Da

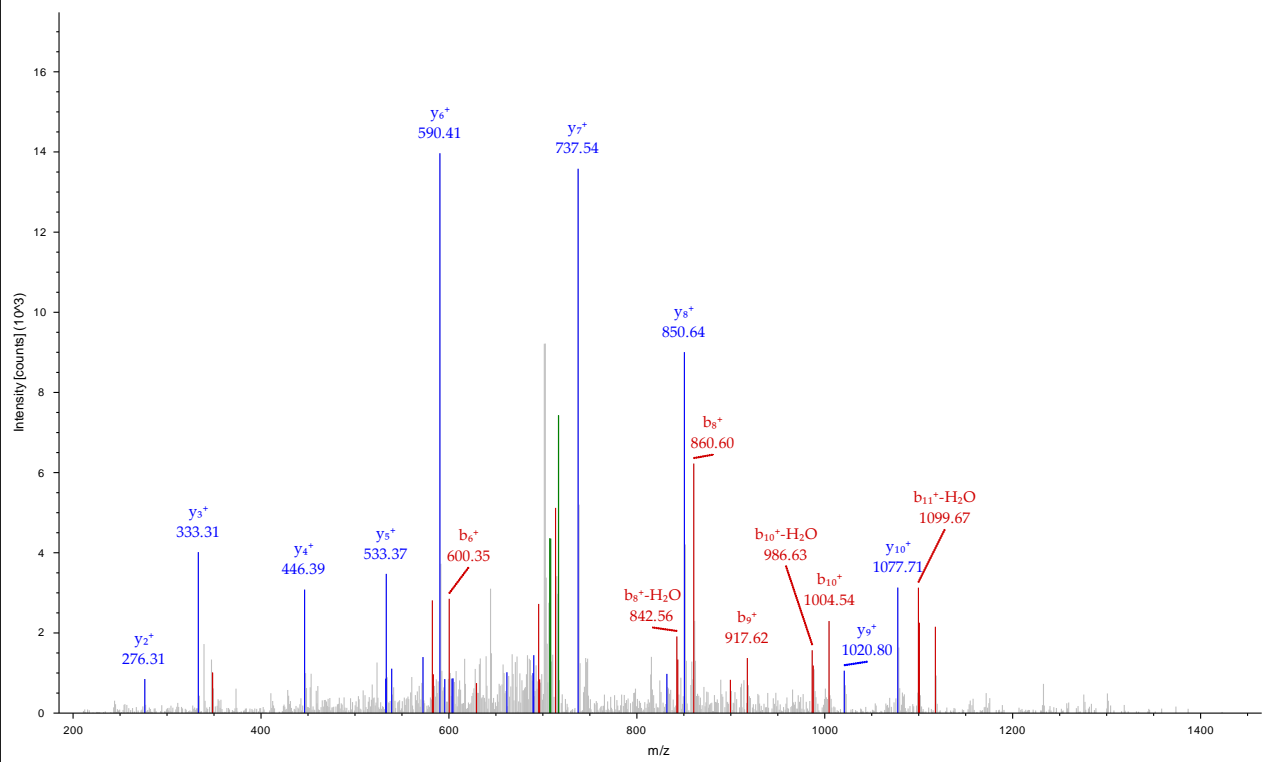

peg.1865 13528

| #1 | b <sup>+</sup> | b <sup>2+</sup> | Seq.     | y <sup>+</sup> | y <sup>2+</sup> | #2 |
|----|----------------|-----------------|----------|----------------|-----------------|----|
| 1  | 72.04440       | 36.52584        | A        |                |                 | 14 |
| 2  | 129.06587      | 65.03657        | G        | 1378.69620     | 689.85174       | 13 |
| 3  | 244.09282      | 122.55005       | D        | 1321.67473     | 661.34100       | 12 |
| 4  | 373.13542      | 187.07135       | E        | 1206.64778     | 603.82753       | 11 |
| 5  | 430.15689      | 215.58208       | G        | 1077.60518     | 539.30623       | 10 |
| 6  | 600.26242      | 300.63485       | K-Acetyl | 1020.58371     | 510.79549       | 9  |
| 7  | 713.34649      | 357.17688       | L        | 850.47817      | 425.74272       | 8  |
| 8  | 860.41491      | 430.71109       | F        | 737.39410      | 369.20069       | 7  |
| 9  | 917.43638      | 459.22183       | G        | 590.32568      | 295.66648       | 6  |
| 10 | 1004.46841     | 502.73784       | S        | 533.30421      | 267.15574       | 5  |
| 11 | 1117.55248     | 559.27988       | I        | 446.27218      | 223.63973       | 4  |
| 12 | 1174.57395     | 587.79061       | G        | 333.18811      | 167.09769       | 3  |
| 13 | 1275.62163     | 638.31445       | T        | 276.16664      | 138.58696       | 2  |
| 14 |                |                 | R        | 175.11896      | 88.06312        | 1  |

Extracted from: Z:\712AB\SK17-S (Ac)\Chichi-Abaumannii-SK17-S-Acety\_DrWu\_20140512.raw #13528 RT: 43.78  
 ITMS, CID@35.00, z=+2, Mono m/z=725.36957 Da, MH+=1449.73186 Da, Match Tol.=0.6 Da

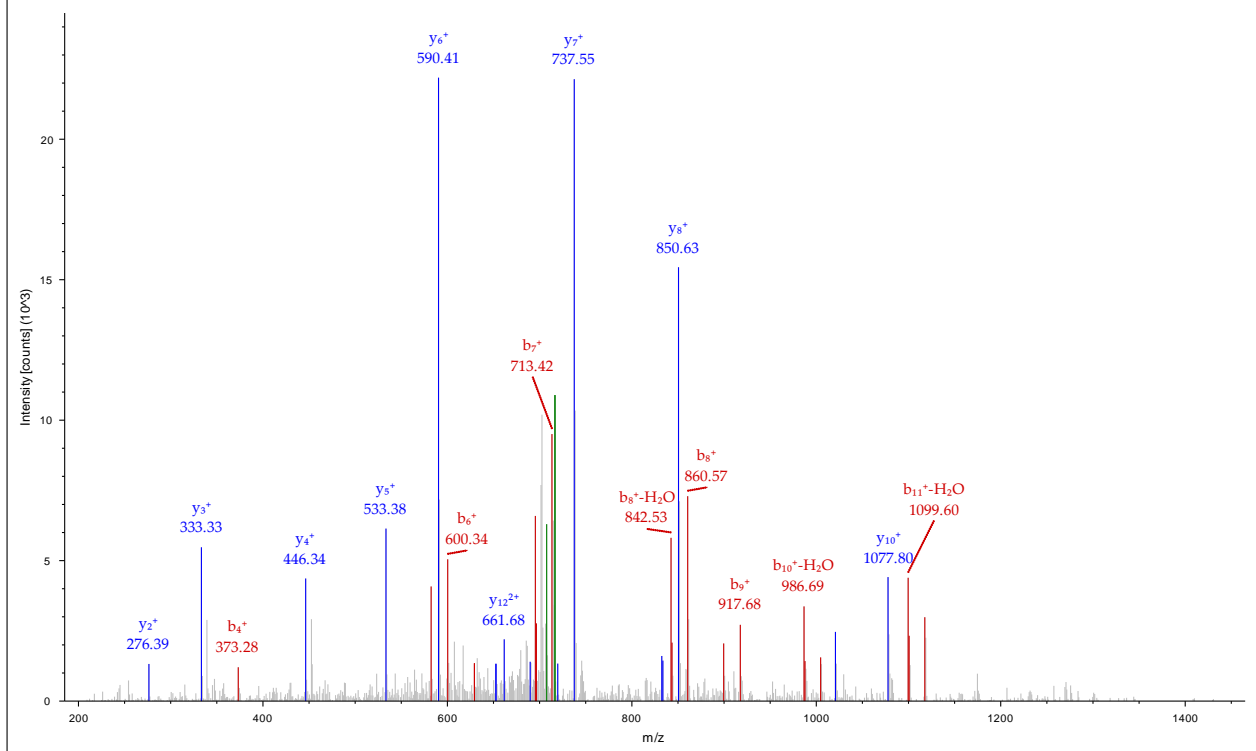

peg.1914 4087

| #1 | b <sup>+</sup> | b <sup>2+</sup> | Seq.        | y <sup>+</sup> | y <sup>2+</sup> | #2 |
|----|----------------|-----------------|-------------|----------------|-----------------|----|
| 1  | 114.09135      | 57.54931        | L           |                |                 | 12 |
| 2  | 261.15977      | 131.08352       | F           | 1368.62129     | 684.81428       | 11 |
| 3  | 348.19180      | 174.59954       | S           | 1221.55287     | 611.28007       | 10 |
| 4  | 435.22383      | 218.11555       | S           | 1134.52084     | 567.76406       | 9  |
| 5  | 563.28241      | 282.14484       | Q           | 1047.48881     | 524.24804       | 8  |
| 6  | 733.38794      | 367.19761       | K-Acetyl    | 919.43023      | 460.21875       | 7  |
| 7  | 847.43087      | 424.21907       | N           | 749.32470      | 375.16599       | 6  |
| 8  | 1007.46153     | 504.23440       | C-Carbam*** | 635.28177      | 318.14452       | 5  |
| 9  | 1136.50413     | 568.75570       | E           | 475.25111      | 238.12919       | 4  |
| 10 | 1264.59910     | 632.80319       | K           | 346.20851      | 173.60789       | 3  |
| 11 | 1392.65768     | 696.83248       | Q           | 218.11354      | 109.56041       | 2  |
| 12 |                |                 | A           | 90.05496       | 45.53112        | 1  |

Extracted from: Z:\712AB\SK17-S (Ac)\Chichi-Abaumannii-SK17-S-Acetyl\_DrWu\_20140512.raw #4087 RT: 20.48  
 ITMS, CID@35.00, z=+2, Mono m/z=741.36011 Da, MH+=1481.71294 Da, Match Tol.=0.6 Da

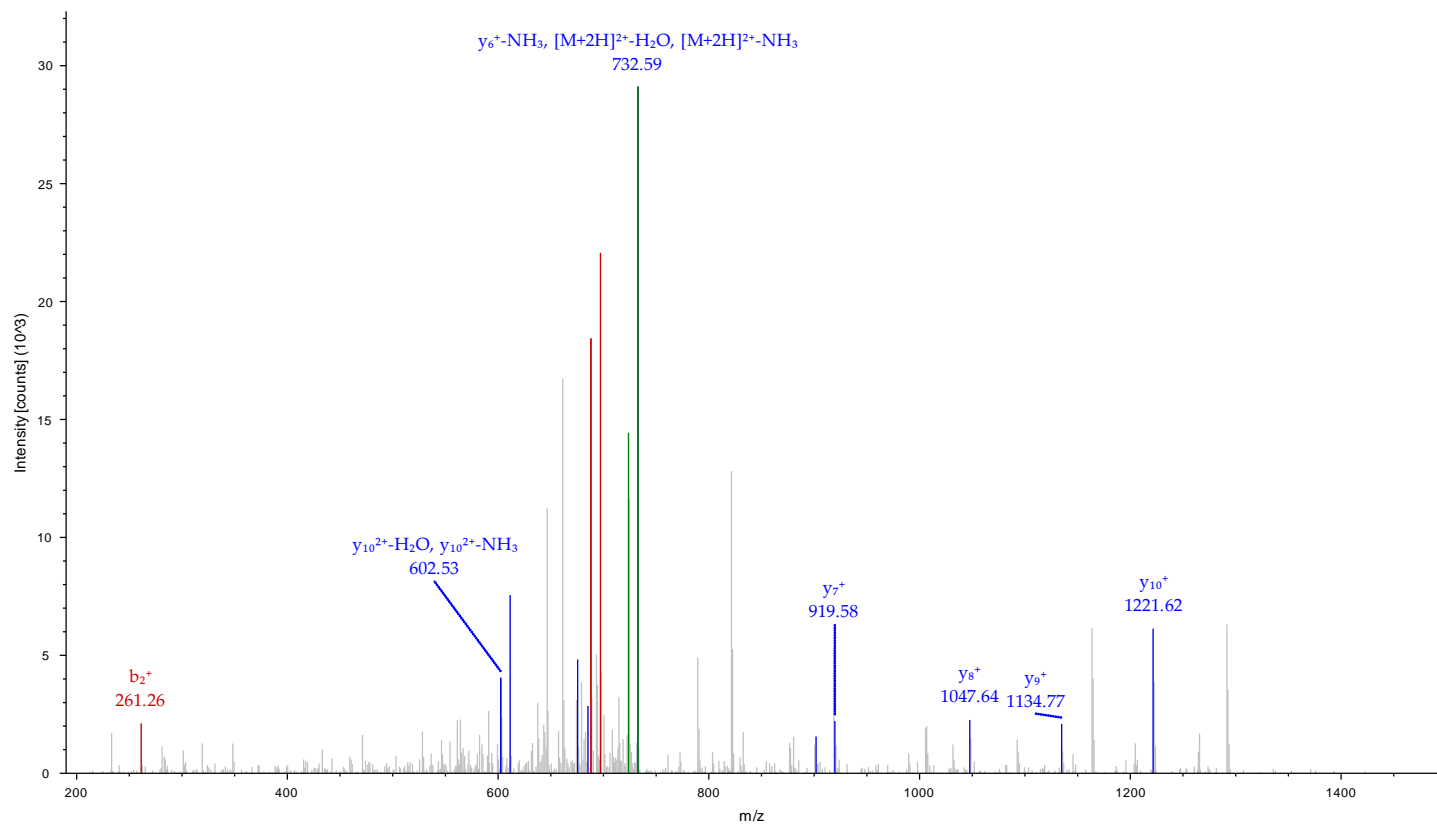

peg.1976 13587

| #1 | b <sup>+</sup> | b <sup>2+</sup> | Seq.     | y <sup>+</sup> | y <sup>2+</sup> | #2 |
|----|----------------|-----------------|----------|----------------|-----------------|----|
| 1  | 171.11281      | 86.06004        | K-Acetyl |                |                 | 10 |
| 2  | 228.13428      | 114.57078       | G        | 986.56297      | 493.78512       | 9  |
| 3  | 356.22925      | 178.61826       | K        | 929.54150      | 465.27439       | 8  |
| 4  | 469.31332      | 235.16030       | L        | 801.44653      | 401.22690       | 7  |
| 5  | 583.35625      | 292.18176       | N        | 688.36246      | 344.68487       | 6  |
| 6  | 698.38320      | 349.69524       | D        | 574.31953      | 287.66340       | 5  |
| 7  | 811.46727      | 406.23727       | L        | 459.29258      | 230.14993       | 4  |
| 8  | 939.52585      | 470.26656       | Q        | 346.20851      | 173.60789       | 3  |
| 9  | 1010.56297     | 505.78512       | A        | 218.14993      | 109.57860       | 2  |
| 10 |                |                 | K        | 147.11281      | 74.06004        | 1  |

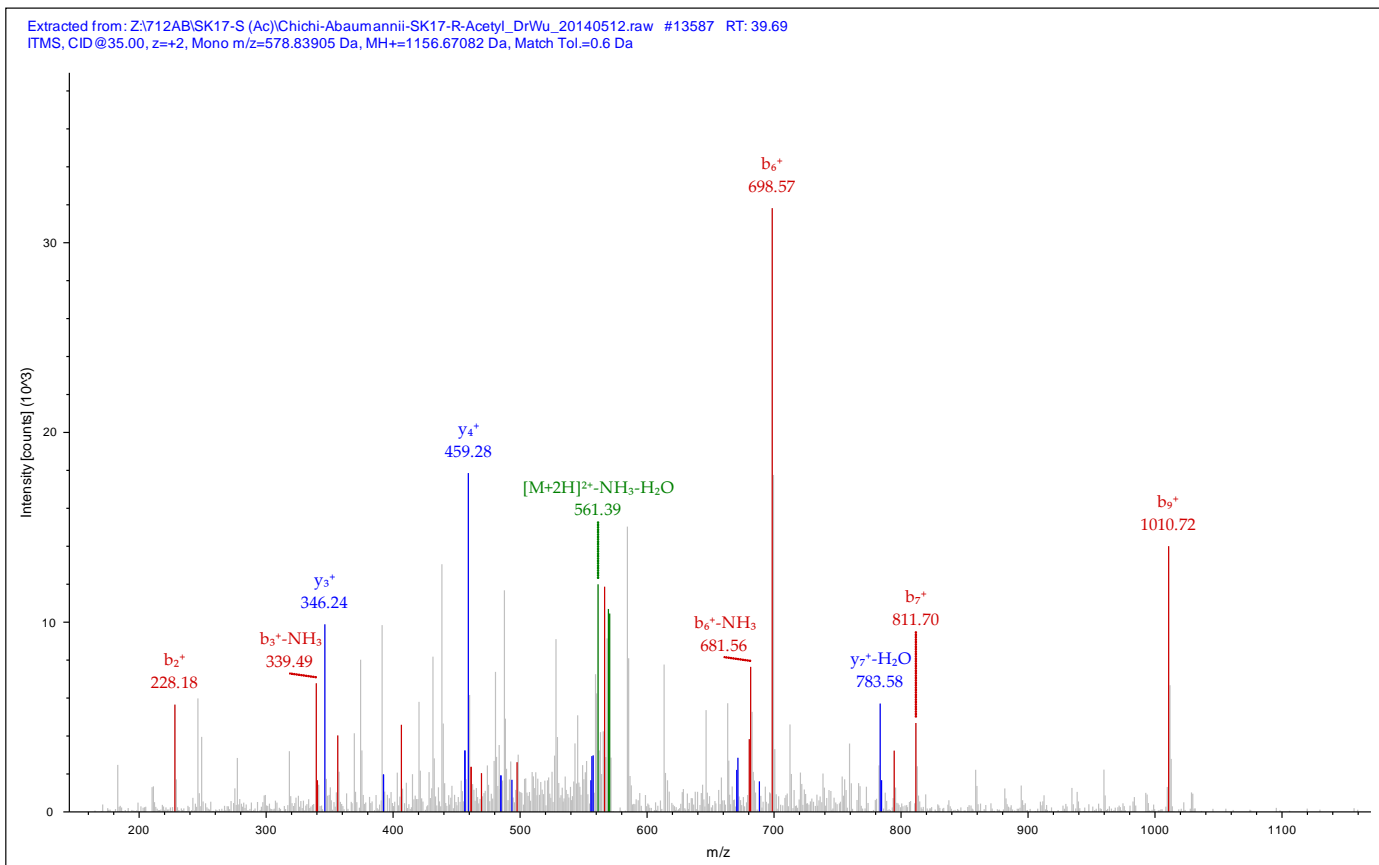

peg.1976 12005

| #1 | b <sup>+</sup> | b <sup>2+</sup> | Seq.     | y <sup>+</sup> | y <sup>2+</sup> | #2 |
|----|----------------|-----------------|----------|----------------|-----------------|----|
| 1  | 171.11281      | 86.06004        | K-Acetyl |                |                 | 10 |
| 2  | 228.13428      | 114.57078       | G        | 986.56297      | 493.78512       | 9  |
| 3  | 356.22925      | 178.61826       | K        | 929.54150      | 465.27439       | 8  |
| 4  | 469.31332      | 235.16030       | L        | 801.44653      | 401.22690       | 7  |
| 5  | 583.35625      | 292.18176       | N        | 688.36246      | 344.68487       | 6  |
| 6  | 698.38320      | 349.69524       | D        | 574.31953      | 287.66340       | 5  |
| 7  | 811.46727      | 406.23727       | L        | 459.29258      | 230.14993       | 4  |
| 8  | 939.52585      | 470.26656       | Q        | 346.20851      | 173.60789       | 3  |
| 9  | 1010.56297     | 505.78512       | A        | 218.14993      | 109.57860       | 2  |
| 10 |                |                 | K        | 147.11281      | 74.06004        | 1  |

Extracted from: Z:\712AB\SK17-S (Ac)\Chichi-Abaumannii-SK17-S-Acetyl\_DrWu\_20140512.raw #12005 RT: 39.93  
 ITMS, CID@35.00, z=+2, Mono m/z=578.83942 Da, MH+=1156.67156 Da, Match Tol.=0.6 Da

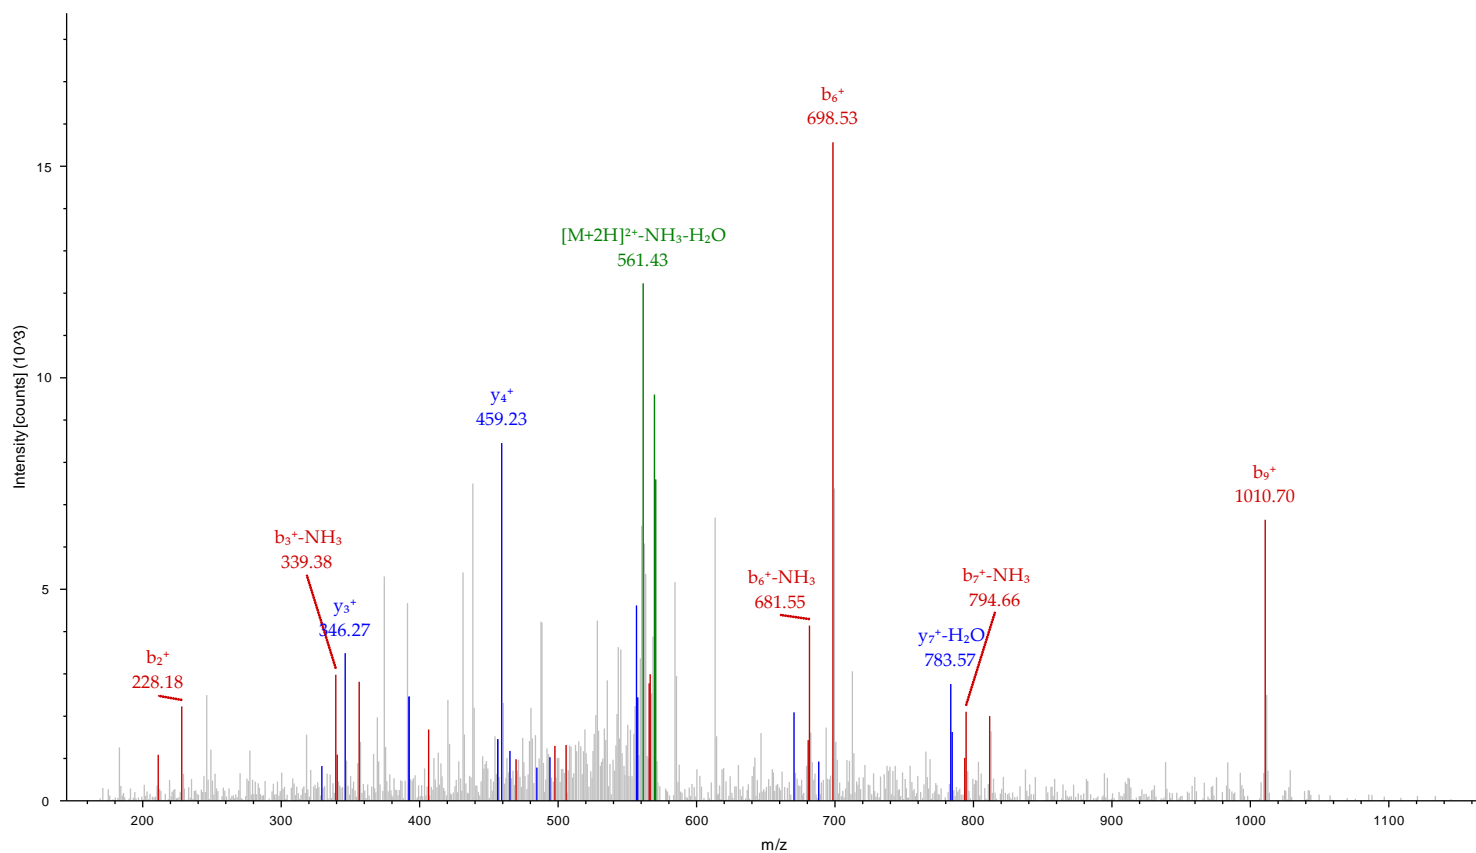

# peg.1982 20002

| #1 | b <sup>+</sup> | b <sup>2+</sup> | b <sup>3+</sup> | Seq.     | y <sup>+</sup> | y <sup>2+</sup> | y <sup>3+</sup> | #2 |
|----|----------------|-----------------|-----------------|----------|----------------|-----------------|-----------------|----|
| 1  | 129.06586      | 65.03657        | 43.69347        | Q        |                |                 |                 | 16 |
| 2  | 228.13428      | 114.57078       | 76.71628        | V        | 1797.99978     | 899.50353       | 600.00478       | 15 |
| 3  | 357.17688      | 179.09208       | 119.73048       | E        | 1698.93136     | 849.96932       | 566.98197       | 14 |
| 4  | 485.27185      | 243.13956       | 162.42880       | K        | 1569.88876     | 785.44802       | 523.96777       | 13 |
| 5  | 582.32462      | 291.66595       | 194.77972       | P        | 1441.79379     | 721.40053       | 481.26945       | 12 |
| 6  | 752.43015      | 376.71871       | 251.48157       | K-Acetyl | 1344.74102     | 672.87415       | 448.91852       | 11 |
| 7  | 865.51422      | 433.26075       | 289.17626       | L        | 1174.63548     | 587.82138       | 392.21668       | 10 |
| 8  | 962.56699      | 481.78713       | 321.52718       | P        | 1061.55141     | 531.27934       | 354.52199       | 9  |
| 9  | 1091.60959     | 546.30843       | 364.54138       | E        | 964.49864      | 482.75296       | 322.17106       | 8  |
| 10 | 1204.69366     | 602.85047       | 402.23607       | I        | 835.45604      | 418.23166       | 279.15686       | 7  |
| 11 | 1319.72061     | 660.36394       | 440.57839       | D        | 722.37197      | 361.68962       | 241.46217       | 6  |
| 12 | 1390.75773     | 695.88250       | 464.25743       | A        | 607.34502      | 304.17615       | 203.11986       | 5  |
| 13 | 1519.80033     | 760.40380       | 507.27163       | E        | 536.30790      | 268.65759       | 179.44082       | 4  |
| 14 | 1666.86875     | 833.93801       | 556.29443       | F        | 407.26530      | 204.13629       | 136.42662       | 3  |
| 15 | 1779.95282     | 890.48005       | 593.98912       | L        | 260.19688      | 130.60208       | 87.40381        | 2  |
| 16 |                |                 |                 | K        | 147.11281      | 74.06004        | 49.70912        | 1  |

Extracted from: Z:\712AB\SK17-S (Ac)Chichi-Abaumannii-SK17-S-Acetyl\_DrWu\_20140703.raw #20002 RT: 55.27  
 ITMS, CID@35.00, z=+3, Mono m/z=642.69202 Da, MH+=1926.06150 Da, Match Tol.=0.6 Da

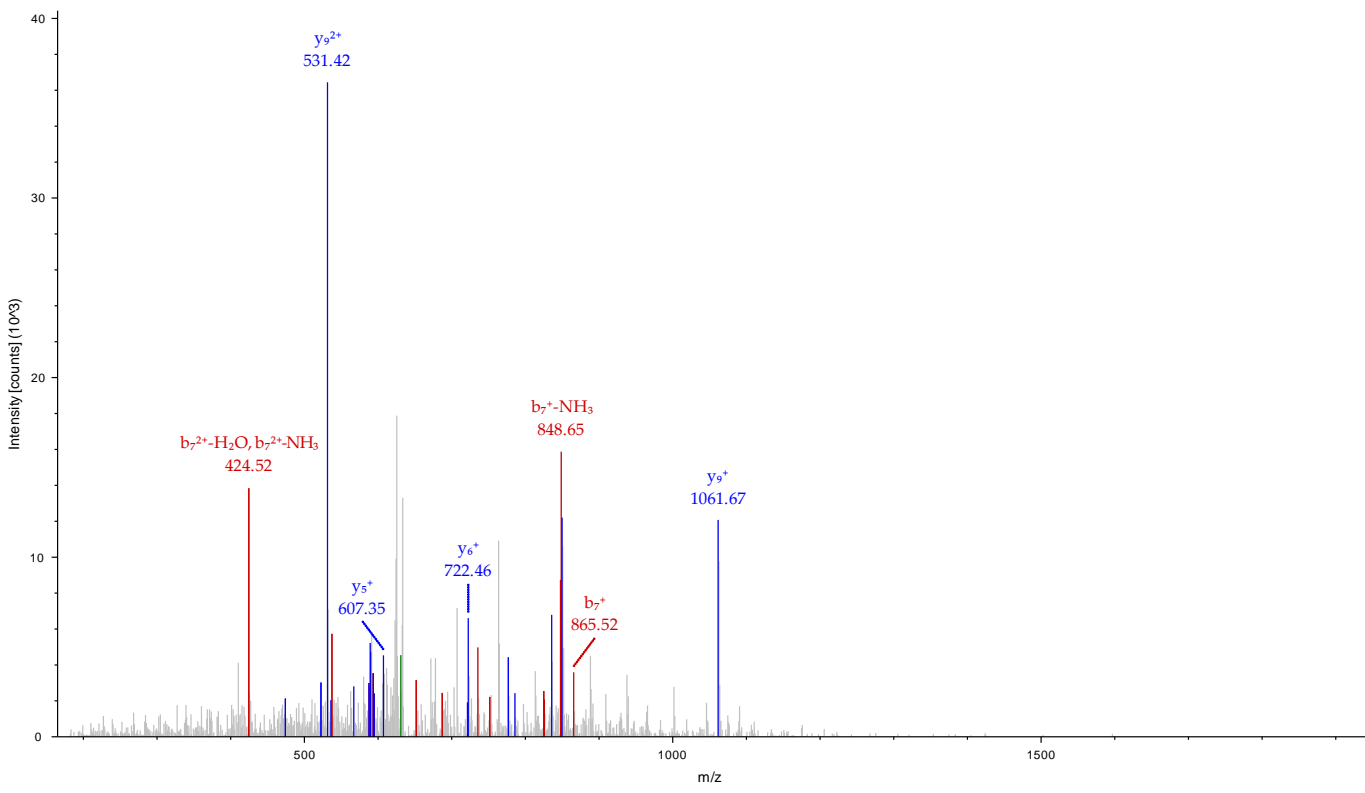



peg.2009 23240

| #1 | b <sup>+</sup> | b <sup>2+</sup> | Seq.        | y <sup>+</sup> | y <sup>2+</sup> | #2 |
|----|----------------|-----------------|-------------|----------------|-----------------|----|
| 1  | 132.04778      | 66.52753        | M           |                |                 | 15 |
| 2  | 245.13185      | 123.06956       | L           | 1829.06058     | 915.03393       | 14 |
| 3  | 360.15880      | 180.58304       | D           | 1715.97651     | 858.49189       | 13 |
| 4  | 530.26433      | 265.63580       | K-Acetyl    | 1600.94956     | 800.97842       | 12 |
| 5  | 643.34840      | 322.17784       | L           | 1430.84402     | 715.92565       | 11 |
| 6  | 756.43247      | 378.71987       | L           | 1317.75995     | 659.38361       | 10 |
| 7  | 869.51654      | 435.26191       | L           | 1204.67588     | 602.84158       | 9  |
| 8  | 982.60061      | 491.80394       | L           | 1091.59181     | 546.29954       | 8  |
| 9  | 1110.65919     | 555.83323       | Q           | 978.50774      | 489.75751       | 7  |
| 10 | 1207.71196     | 604.35962       | P           | 850.44916      | 425.72822       | 6  |
| 11 | 1367.74262     | 684.37495       | C-Carbam... | 753.39639      | 377.20183       | 5  |
| 12 | 1480.82669     | 740.91698       | L           | 593.36574      | 297.18651       | 4  |
| 13 | 1643.89001     | 822.44864       | Y           | 480.28167      | 240.64447       | 3  |
| 14 | 1813.99554     | 907.50141       | K-Acetyl    | 317.21835      | 159.11281       | 2  |
| 15 |                |                 | K           | 147.11281      | 74.06004        | 1  |

Extracted from: Z:\712AB\SK17-S (Ac)\Chichi-Abaumannii-SK17-R-Acetyl\_DrWu\_20140512.raw #23240 RT: 66.37  
 ITMS, CID@35.00, z=+2, Mono m/z=980.54846 Da, MH+=1960.08965 Da, Match Tol.=0.6 Da

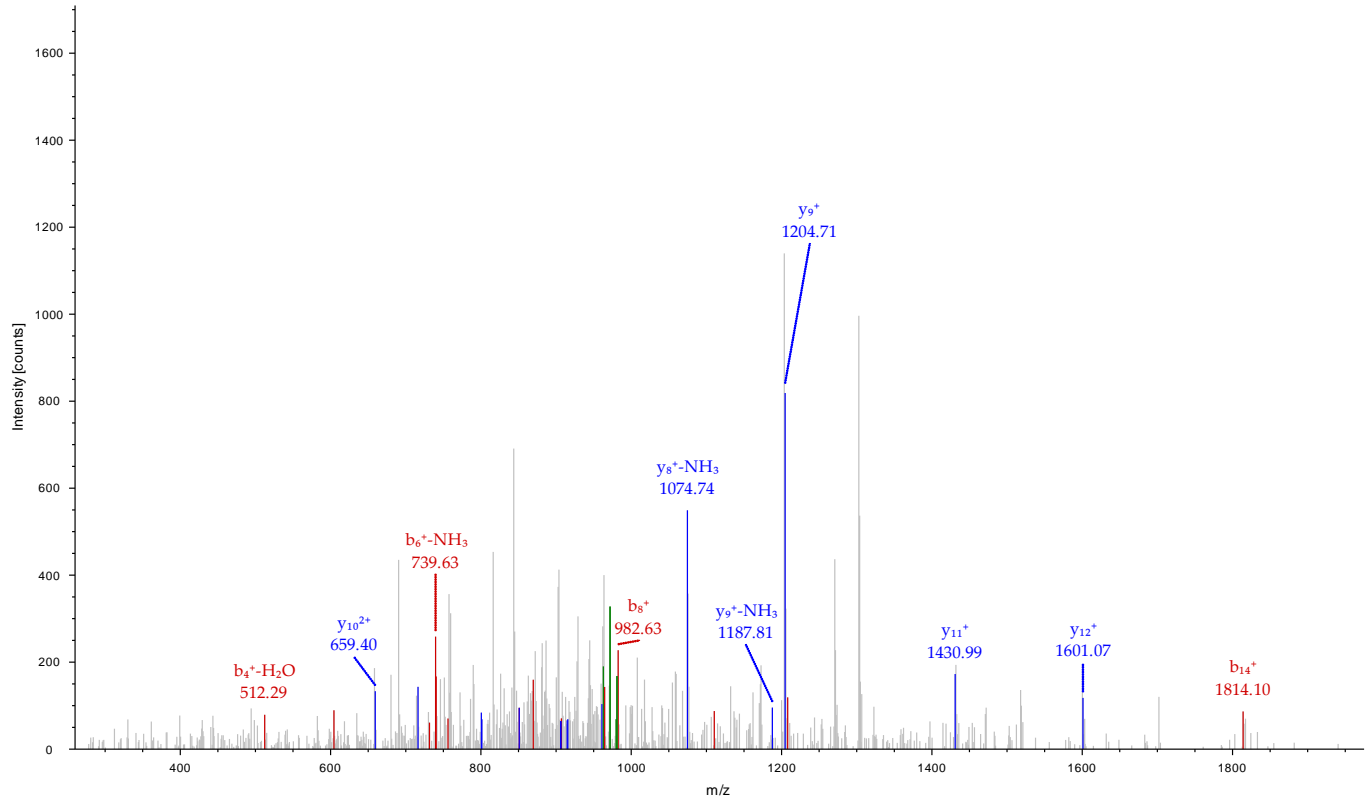

peg.2053 25315

| #1 | b <sup>+</sup> | b <sup>2+</sup> | b <sup>3+</sup> | Seq.        | y <sup>+</sup> | y <sup>2+</sup> | y <sup>3+</sup> | #2 |
|----|----------------|-----------------|-----------------|-------------|----------------|-----------------|-----------------|----|
| 1  | 116.03423      | 58.52075        | 39.34959        | D           |                |                 |                 | 22 |
| 2  | 173.05570      | 87.03149        | 58.35675        | G           | 2342.17318     | 1171.59023      | 781.39591       | 21 |
| 3  | 333.08635      | 167.04681       | 111.70030       | C-Carbem... | 2285.15171     | 1143.07949      | 762.38875       | 20 |
| 4  | 404.12347      | 202.56537       | 135.37934       | A           | 2125.12105     | 1063.06416      | 709.04520       | 19 |
| 5  | 501.17624      | 251.09176       | 167.73026       | P           | 2054.08393     | 1027.54560      | 685.36616       | 18 |
| 6  | 630.21884      | 315.61306       | 210.74446       | E           | 1957.03116     | 979.01922       | 653.01524       | 17 |
| 7  | 745.24579      | 373.12653       | 249.08678       | D           | 1827.98856     | 914.49792       | 610.00104       | 16 |
| 8  | 844.31421      | 422.66074       | 282.10959       | V           | 1712.96161     | 856.98444       | 571.65872       | 15 |
| 9  | 915.35133      | 458.17930       | 305.78863       | A           | 1613.89319     | 807.45023       | 538.63591       | 14 |
| 10 | 1044.39393     | 522.70060       | 348.80283       | E           | 1542.85607     | 771.93167       | 514.95687       | 13 |
| 11 | 1157.47800     | 579.24264       | 386.49752       | L           | 1413.81347     | 707.41037       | 471.94267       | 12 |
| 12 | 1256.54642     | 628.77685       | 419.52032       | V           | 1300.72940     | 650.86834       | 434.24798       | 11 |
| 13 | 1327.58354     | 664.29541       | 443.19936       | A           | 1201.66098     | 601.33413       | 401.22518       | 10 |
| 14 | 1455.64212     | 728.32470       | 485.88556       | Q           | 1130.62386     | 565.81557       | 377.54614       | 9  |
| 15 | 1602.67754     | 801.84241       | 534.89736       | M-Oxidation | 1002.56528     | 501.78628       | 334.85994       | 8  |
| 16 | 1689.70957     | 845.35842       | 563.90804       | S           | 855.52987      | 428.26857       | 285.84814       | 7  |
| 17 | 1817.76815     | 909.38771       | 606.59423       | Q           | 768.49784      | 384.75256       | 256.83746       | 6  |
| 18 | 1930.85222     | 965.92975       | 644.28892       | L           | 640.43926      | 320.72327       | 214.15127       | 5  |
| 19 | 2027.90499     | 1014.45613      | 676.63985       | P           | 527.35519      | 264.18123       | 176.45658       | 4  |
| 20 | 2198.01052     | 1099.50890      | 733.34169       | K-Acetyl    | 430.30242      | 215.65485       | 144.10566       | 3  |
| 21 | 2311.09459     | 1156.05093      | 771.03638       | I           | 260.19688      | 130.60208       | 87.40381        | 2  |
| 22 |                |                 |                 | K           | 147.11281      | 74.06004        | 49.70912        | 1  |

Extracted from: Z:\712AB\SK17-S (Ac)\Chichi-Abaumannii-SK17-S-Acetyl\_DrWu\_20140703.raw #25315 RT: 69.18  
 ITMS, CID@35.00, z=+3, Mono m/z=819.74512 Da, MH+=2457.22080 Da, Match Tol.=0.6 Da

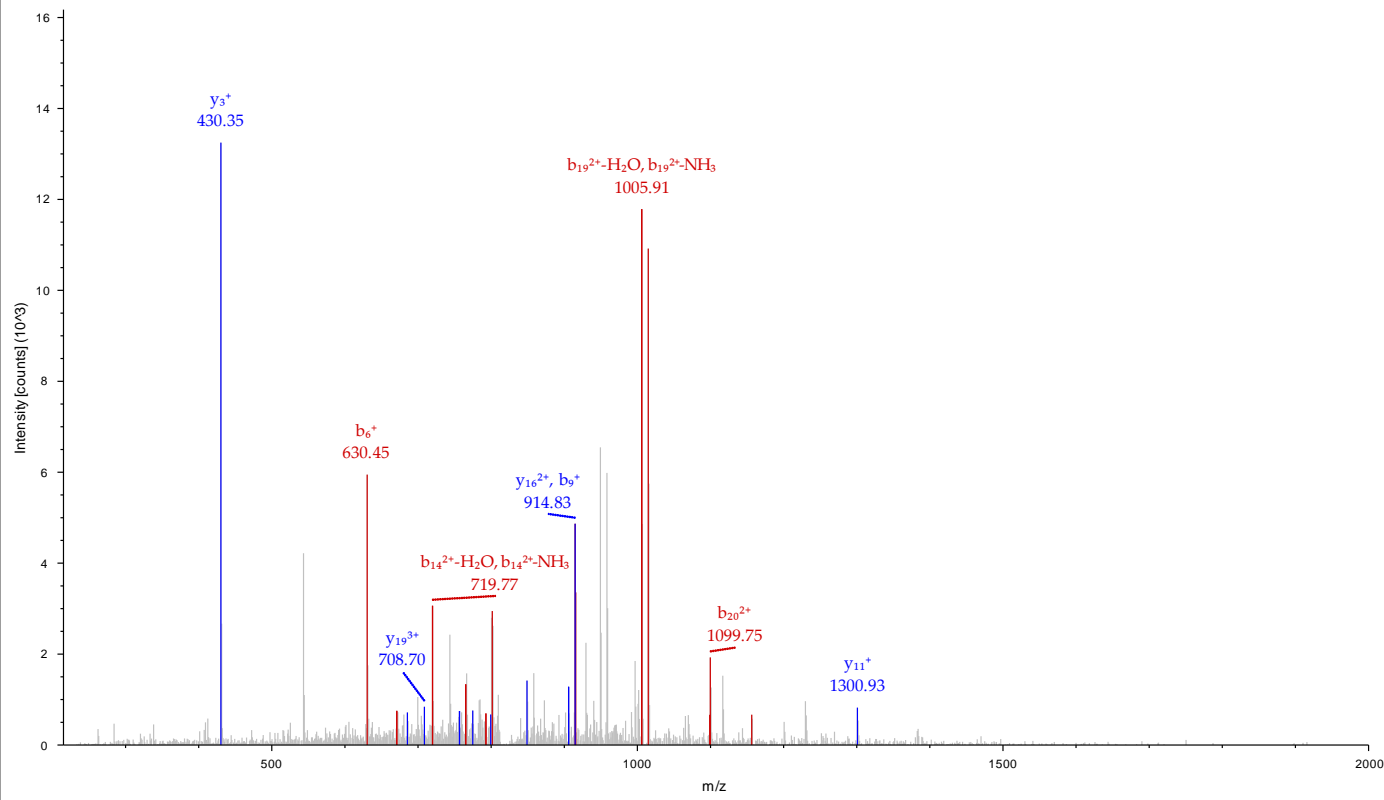

peg.2065 24992

| #1 | b <sup>+</sup> | b <sup>2+</sup> | b <sup>3+</sup> | Seq.        | y <sup>+</sup> | y <sup>2+</sup> | y <sup>3+</sup> | #2 |
|----|----------------|-----------------|-----------------|-------------|----------------|-----------------|-----------------|----|
| 1  | 206.08116      | 103.54422       | 69.36524        | Y-Acetyl    |                |                 |                 | 19 |
| 2  | 353.11658      | 177.06193       | 118.37704       | M-Oxidation | 1929.01850     | 965.01289       | 643.67768       | 18 |
| 3  | 452.18500      | 226.59614       | 151.39985       | V           | 1781.98308     | 891.49518       | 594.66588       | 17 |
| 4  | 551.25342      | 276.13035       | 184.42266       | V           | 1682.91466     | 841.96097       | 561.64307       | 16 |
| 5  | 622.29054      | 311.64891       | 208.10170       | A           | 1583.84624     | 792.42676       | 528.62026       | 15 |
| 6  | 736.33347      | 368.67037       | 246.11601       | N           | 1512.80912     | 756.90820       | 504.94122       | 14 |
| 7  | 837.38115      | 419.19421       | 279.79857       | T           | 1398.76619     | 699.88673       | 466.92691       | 13 |
| 8  | 934.43392      | 467.72060       | 312.14949       | P           | 1297.71851     | 649.36289       | 433.24435       | 12 |
| 9  | 1047.51799     | 524.26263       | 349.84418       | L           | 1200.66574     | 600.83651       | 400.89343       | 11 |
| 10 | 1118.55511     | 559.78119       | 373.52322       | A           | 1087.58167     | 544.29447       | 363.19874       | 10 |
| 11 | 1217.62353     | 609.31540       | 406.54603       | V           | 1016.54455     | 508.77591       | 339.51970       | 9  |
| 12 | 1387.72906     | 694.36817       | 463.24787       | K-Acetyl    | 917.47613      | 459.24170       | 306.49689       | 8  |
| 13 | 1458.76618     | 729.88673       | 486.92691       | A           | 747.37060      | 374.18894       | 249.79505       | 7  |
| 14 | 1515.78765     | 758.39746       | 505.93407       | G           | 676.33348      | 338.67038       | 226.11601       | 6  |
| 15 | 1618.79684     | 809.90206       | 540.27046       | C           | 619.31201      | 310.15964       | 207.10885       | 5  |
| 16 | 1733.82379     | 867.41553       | 578.61278       | D           | 516.30282      | 258.65505       | 172.77246       | 4  |
| 17 | 1832.89221     | 916.94974       | 611.63559       | V           | 401.27587      | 201.14157       | 134.43014       | 3  |
| 18 | 1945.97628     | 973.49178       | 649.33028       | L           | 302.20745      | 151.60736       | 101.40733       | 2  |
| 19 |                |                 |                 | K-Acetyl    | 189.12338      | 95.06533        | 63.71264        | 1  |

Extracted from: Z:\712AB\SK17-S (Ac)\Chichi-Abaumannii-SK17-S-Acetyl\_DrWu\_20140703.raw #24992 RT: 68.28  
ITMS, CID@35.00, z=+3, Mono m/z=712.03467 Da, MH+=2134.08945 Da, Match Tol.=0.6 Da

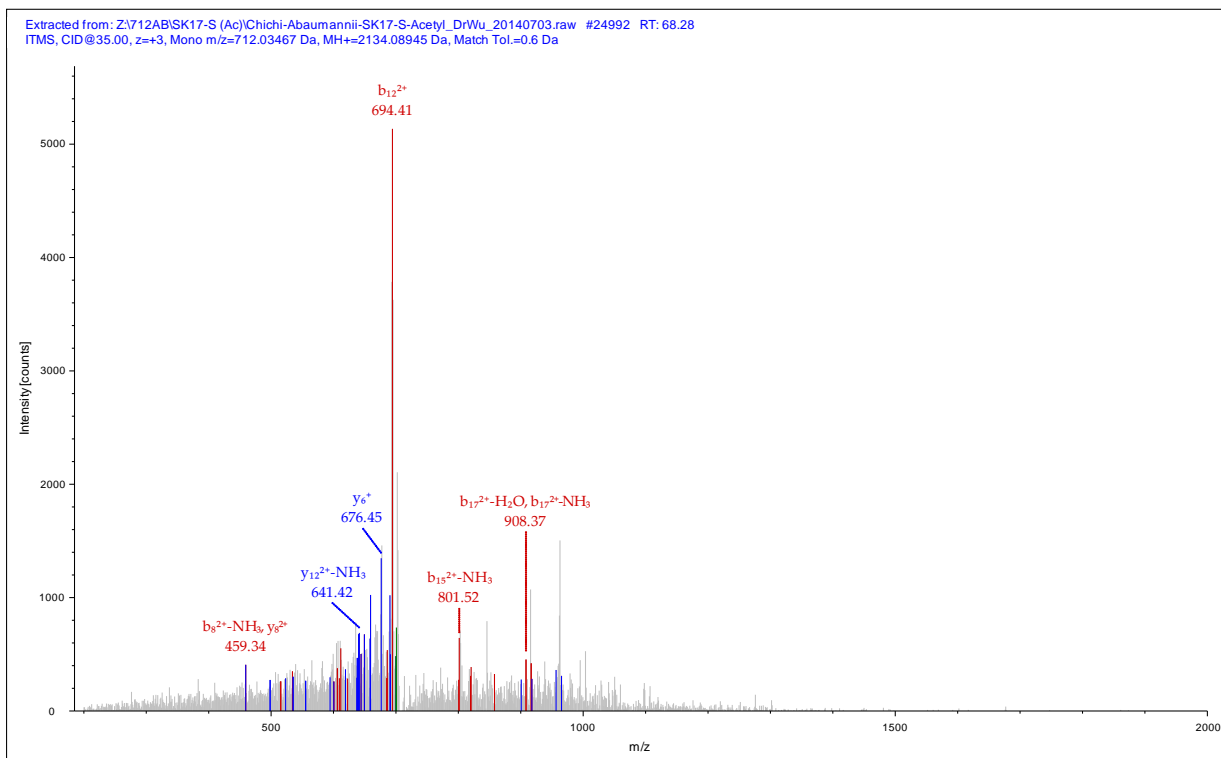

peg.2101 4222

| #1 | b <sup>+</sup> | b <sup>2+</sup> | Seq.     | y <sup>+</sup> | y <sup>2+</sup> | #2 |
|----|----------------|-----------------|----------|----------------|-----------------|----|
| 1  | 174.05834      | 87.53281        | M-Acetyl |                |                 | 10 |
| 2  | 231.07981      | 116.04354       | G        | 1111.68343     | 556.34535       | 9  |
| 3  | 359.13839      | 180.07283       | Q        | 1054.66196     | 527.83462       | 8  |
| 4  | 472.22246      | 236.61487       | L        | 926.60338      | 463.80533       | 7  |
| 5  | 642.32800      | 321.66764       | K-Acetyl | 813.51931      | 407.26329       | 6  |
| 6  | 755.41207      | 378.20967       | I        | 643.41377      | 322.21052       | 5  |
| 7  | 868.49614      | 434.75171       | L        | 530.32970      | 265.66849       | 4  |
| 8  | 997.53874      | 499.27301       | E        | 417.24563      | 209.12645       | 3  |
| 9  | 1110.62281     | 555.81504       | L        | 288.20303      | 144.60515       | 2  |
| 10 |                |                 | R        | 175.11896      | 88.06312        | 1  |

Extracted from: Z:\712AB\SK17-S (Ac)Chichi-Abaumanii-SK17-S-Acetyl\_DrWu\_20140703.raw #4222 RT: 17.90  
 ITMS, CID@35.00, z=+2, Mono m/z=642.87219 Da, MH+=1284.73711 Da, Match Tol.=0.6 Da

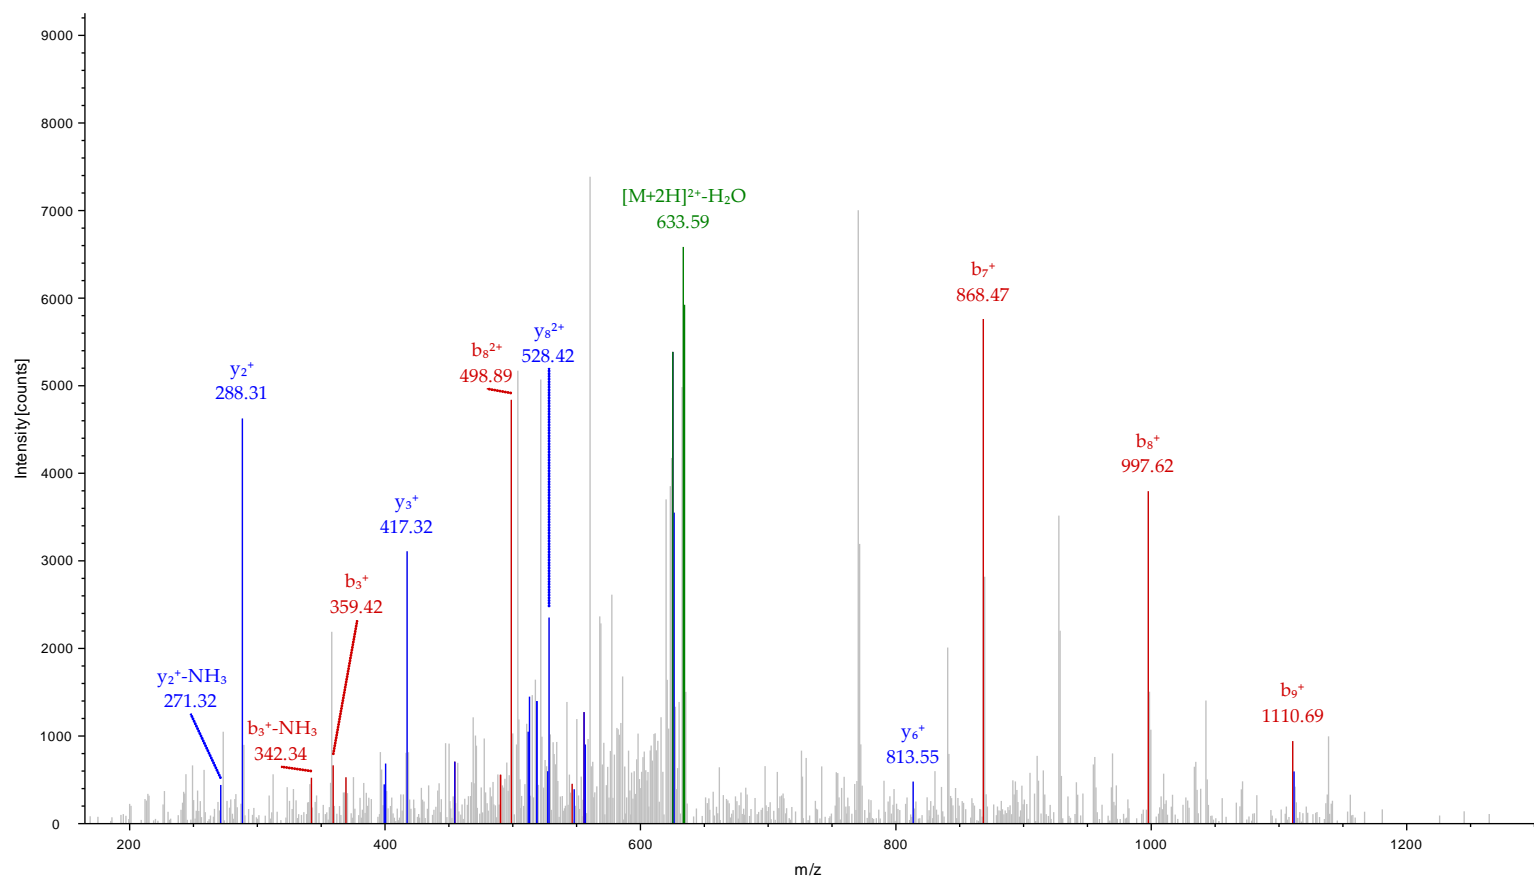

# peg.2109 21062

| #1 | b <sup>+</sup> | b <sup>2+</sup> | Seq.        | y <sup>+</sup> | y <sup>2+</sup> | #2 |
|----|----------------|-----------------|-------------|----------------|-----------------|----|
| 1  | 146.02703      | 73.51715        | C-Acetyl    |                |                 | 20 |
| 2  | 247.07471      | 124.04099       | T           | 1931.00898     | 966.00813       | 19 |
| 3  | 417.18025      | 209.09376       | K-Acetyl    | 1829.96130     | 915.48429       | 18 |
| 4  | 488.21737      | 244.61232       | A           | 1659.85577     | 830.43152       | 17 |
| 5  | 559.25449      | 280.13088       | A           | 1588.81865     | 794.91296       | 16 |
| 6  | 660.30217      | 330.65472       | T           | 1517.78153     | 759.39440       | 15 |
| 7  | 731.33929      | 366.17328       | A           | 1416.73385     | 708.87056       | 14 |
| 8  | 891.36994      | 446.18861       | C-Carbam... | 1345.69673     | 673.35200       | 13 |
| 9  | 948.39141      | 474.69934       | G           | 1185.66607     | 593.33667       | 12 |
| 10 | 1005.41288     | 503.21008       | G           | 1128.64460     | 564.82594       | 11 |
| 11 | 1108.42207     | 554.71467       | C           | 1071.62313     | 536.31520       | 10 |
| 12 | 1179.45919     | 590.23323       | A           | 968.61394      | 484.81061       | 9  |
| 13 | 1276.51196     | 638.75962       | P           | 897.57682      | 449.29205       | 8  |
| 14 | 1389.59603     | 695.30165       | L           | 800.52405      | 400.76566       | 7  |
| 15 | 1488.66445     | 744.83586       | V           | 687.43998      | 344.22363       | 6  |
| 16 | 1589.71213     | 795.35970       | T           | 588.37156      | 294.68942       | 5  |
| 17 | 1717.77071     | 859.38899       | Q           | 487.32388      | 244.16558       | 4  |
| 18 | 1816.83913     | 908.92320       | V           | 359.26530      | 180.13629       | 3  |
| 19 | 1929.92320     | 965.46524       | L           | 260.19688      | 130.60208       | 2  |
| 20 |                |                 | K           | 147.11281      | 74.06004        | 1  |

Extracted from: Z:\712AB\SK17-S (Ac)Chichi-Abaumannii-SK17-R-Acetyl\_DrWu\_20140703.raw #21062 RT: 58.64  
 ITMS, CID@35.00, z=+2, Mono m/z=1038.51038 Da, MH+=2076.01348 Da, Match Tol.=0.6 Da

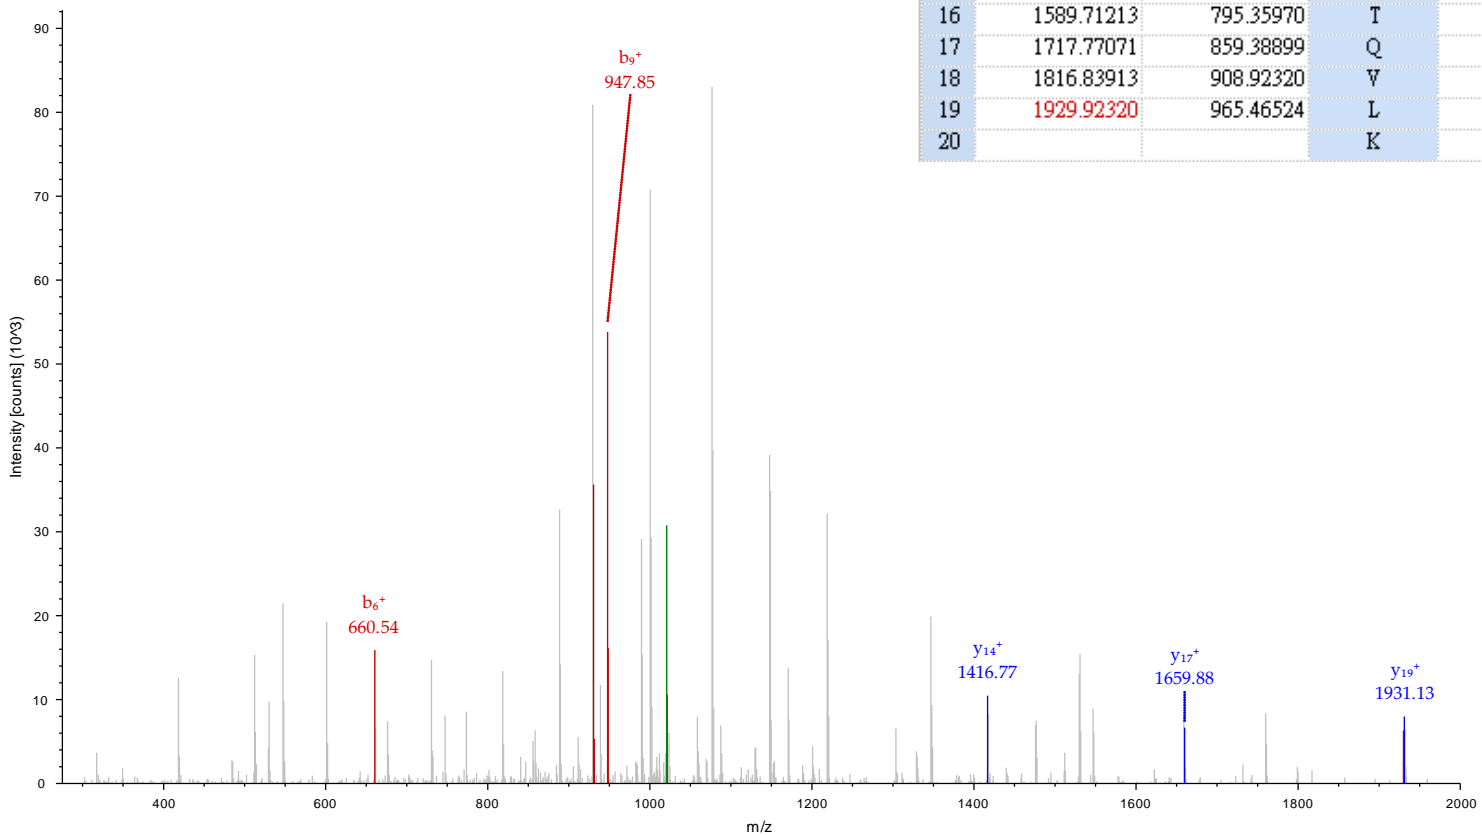

# peg.2119 8658

| #1 | b <sup>+</sup> | b <sup>2+</sup> | b <sup>3+</sup> | Seq.     | y <sup>+</sup> | y <sup>2+</sup> | y <sup>3+</sup> | #2 |
|----|----------------|-----------------|-----------------|----------|----------------|-----------------|-----------------|----|
| 1  | 115.05021      | 58.02874        | 39.02159        | N        |                |                 |                 | 15 |
| 2  | 228.13428      | 114.57078       | 76.71628        | L        | 1733.91815     | 867.46271       | 578.64423       | 14 |
| 3  | 327.20270      | 164.10499       | 109.73908       | V        | 1620.83408     | 810.92068       | 540.94954       | 13 |
| 4  | 456.24530      | 228.62629       | 152.75328       | E        | 1521.76566     | 761.38647       | 507.92674       | 12 |
| 5  | 593.30421      | 297.15574       | 198.43959       | H        | 1392.72306     | 696.86517       | 464.91254       | 11 |
| 6  | 722.34681      | 361.67704       | 241.45379       | E        | 1255.66415     | 628.33571       | 419.22623       | 10 |
| 7  | 836.38974      | 418.69851       | 279.46810       | N        | 1126.62155     | 563.81441       | 376.21203       | 9  |
| 8  | 965.43234      | 483.21981       | 322.48230       | E        | 1012.57862     | 506.79295       | 338.19772       | 8  |
| 9  | 1062.48511     | 531.74619       | 354.83322       | P        | 883.53602      | 442.27165       | 295.18352       | 7  |
| 10 | 1175.56918     | 588.28823       | 392.52791       | L        | 786.48325      | 393.74526       | 262.83260       | 6  |
| 11 | 1345.67471     | 673.34099       | 449.22975       | K-Acetyl | 673.39918      | 337.20323       | 225.13791       | 5  |
| 12 | 1458.75878     | 729.88303       | 486.92444       | L        | 503.29364      | 252.15046       | 168.43606       | 4  |
| 13 | 1545.79081     | 773.39904       | 515.93512       | S        | 390.20957      | 195.60842       | 130.74137       | 3  |
| 14 | 1673.84939     | 837.42833       | 558.62131       | Q        | 303.17754      | 152.09241       | 101.73070       | 2  |
| 15 |                |                 |                 | R        | 175.11896      | 88.06312        | 59.04450        | 1  |

Extracted from: Z:\712AB\SK17-S (Ac)Chichi-Abaumannii-SK17-S-Acetyl\_DrWu\_20140512.raw #8658 RT: 31.61  
 ITMS, CID@35.00, z=+3, Mono m/z=616.65741 Da, MH+=1847.95768 Da, Match Tol.=0.6 Da

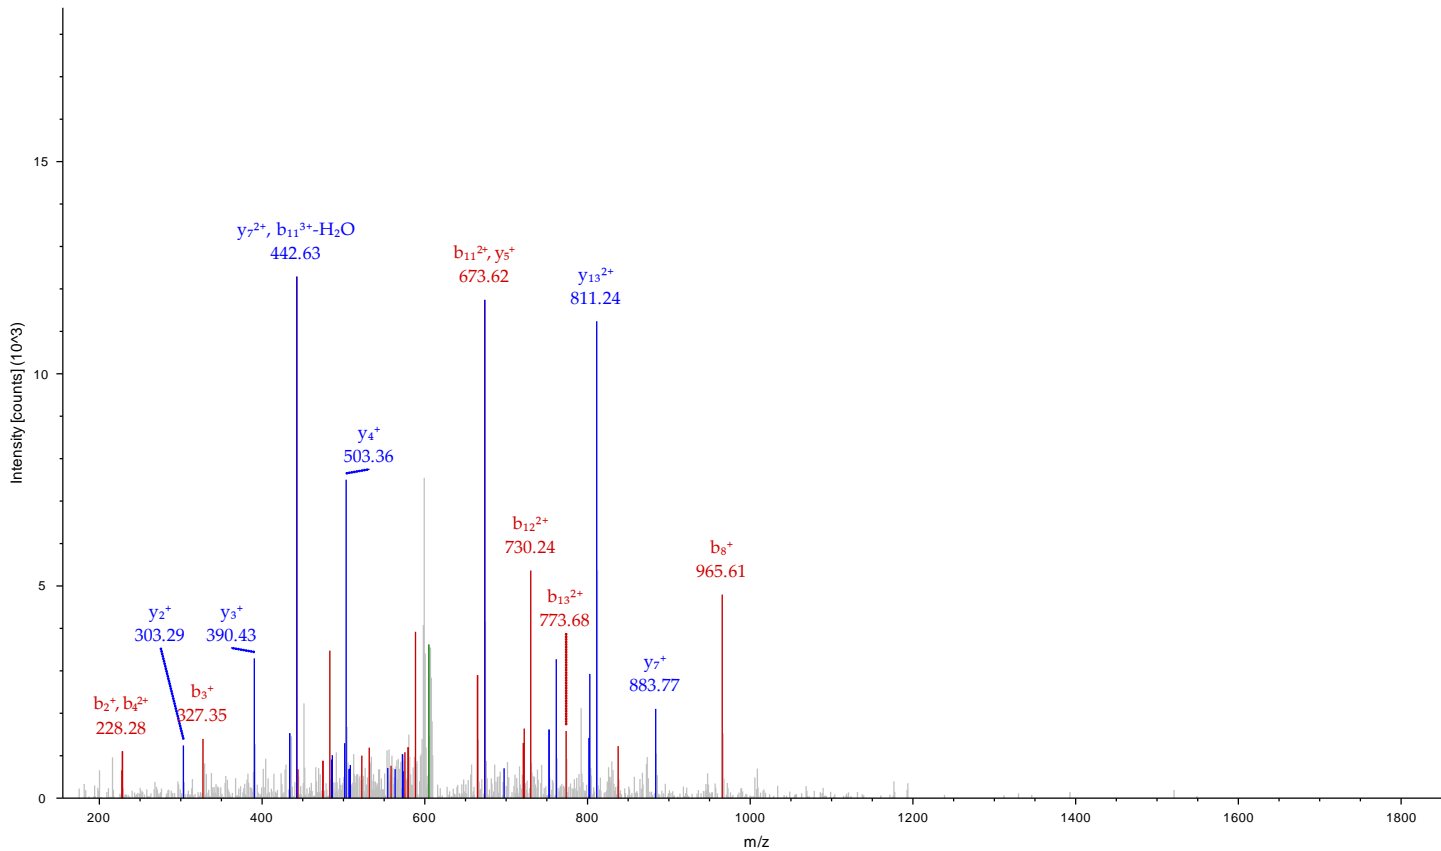

peg.2158 23501

| #1 | b <sup>+</sup> | b <sup>2+</sup> | Seq.     | y <sup>+</sup> | y <sup>2+</sup> | #2 |
|----|----------------|-----------------|----------|----------------|-----------------|----|
| 1  | 100.03931      | 50.52329        | G-Acetyl |                |                 | 10 |
| 2  | 263.10263      | 132.05495       | Y        | 1140.60483     | 570.80605       | 9  |
| 3  | 376.18670      | 188.59699       | L        | 977.54151      | 489.27439       | 8  |
| 4  | 523.25512      | 262.13120       | F        | 864.45744      | 432.73236       | 7  |
| 5  | 636.33919      | 318.67323       | I        | 717.38902      | 359.19815       | 6  |
| 6  | 751.36614      | 376.18671       | D        | 604.30495      | 302.65611       | 5  |
| 7  | 838.39817      | 419.70272       | S        | 489.27800      | 245.14264       | 4  |
| 8  | 1008.50371     | 504.75549       | K-Acetyl | 402.24597      | 201.62662       | 3  |
| 9  | 1065.52518     | 533.26623       | G        | 232.14043      | 116.57385       | 2  |
| 10 |                |                 | R        | 175.11896      | 88.06312        | 1  |

Extracted from: Z:\712AB\SK17-S (Ac)\Chichi-Abaumannii-SK17-R-Acetyl\_DrWu\_20140512.raw #23501 RT: 67.22  
 ITMS, CID@35.00, z=+2, Mono m/z=620.32727 Da, MH+=1239.64726 Da, Match Tol.=0.6 Da

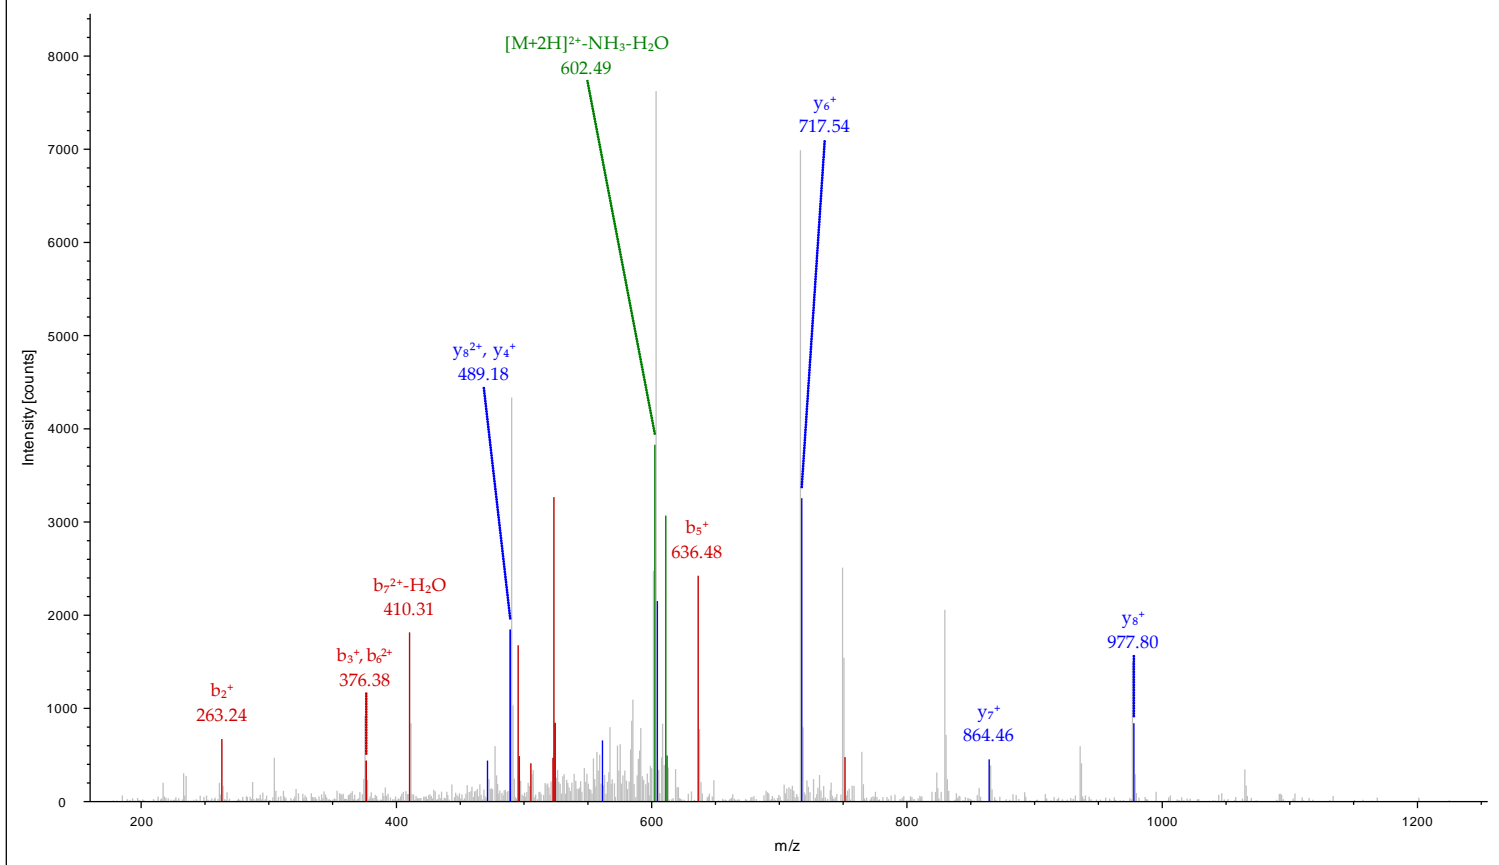

| #1 | b <sup>+</sup> | b <sup>2+</sup> | b <sup>3+</sup> | Seq.        | y <sup>+</sup> | y <sup>2+</sup> | y <sup>3+</sup> | #2 |
|----|----------------|-----------------|-----------------|-------------|----------------|-----------------|-----------------|----|
| 1  | 100.03931      | 50.52329        | 34.01795        | G-Acetyl    |                |                 |                 | 24 |
| 2  | 228.09789      | 114.55258       | 76.70415        | Q           | 2849.46155     | 1425.23441      | 950.49203       | 23 |
| 3  | 356.15647      | 178.58187       | 119.39034       | Q           | 2721.40297     | 1361.20512      | 907.80584       | 22 |
| 4  | 469.24054      | 235.12391       | 157.08503       | L           | 2593.34439     | 1297.17583      | 865.11965       | 21 |
| 5  | 583.28347      | 292.14537       | 195.09934       | N           | 2480.26032     | 1240.63380      | 827.42496       | 20 |
| 6  | 711.34205      | 356.17466       | 237.78553       | Q           | 2366.21739     | 1183.61233      | 789.41065       | 19 |
| 7  | 798.37408      | 399.69068       | 266.79621       | S           | 2238.15881     | 1119.58304      | 746.72445       | 18 |
| 8  | 855.39555      | 428.20141       | 285.80337       | G           | 2151.12678     | 1076.06703      | 717.71378       | 17 |
| 9  | 983.45413      | 492.23070       | 328.48956       | Q           | 2094.10531     | 1047.55629      | 698.70662       | 16 |
| 10 | 1082.52255     | 541.76491       | 361.51237       | V           | 1966.04673     | 983.52700       | 656.02043       | 15 |
| 11 | 1197.54950     | 599.27839       | 399.85468       | D           | 1866.97831     | 933.99279       | 622.99762       | 14 |
| 12 | 1325.60808     | 663.30768       | 442.54088       | Q           | 1751.95136     | 876.47932       | 584.65530       | 13 |
| 13 | 1424.67650     | 712.84189       | 475.56368       | V           | 1623.89278     | 812.45003       | 541.96911       | 12 |
| 14 | 1552.77147     | 776.88937       | 518.26201       | K           | 1524.82436     | 762.91582       | 508.94630       | 11 |
| 15 | 1699.83989     | 850.42358       | 567.28481       | F           | 1396.72939     | 698.86833       | 466.24798       | 10 |
| 16 | 1800.88757     | 900.94742       | 600.96737       | T           | 1249.66097     | 625.33412       | 417.22517       | 9  |
| 17 | 1928.94615     | 964.97671       | 643.65357       | Q           | 1148.61329     | 574.81028       | 383.54261       | 8  |
| 18 | 2088.97681     | 1044.99204      | 696.99712       | C-Carbam... | 1020.55471     | 510.78099       | 340.85642       | 7  |
| 19 | 2202.06088     | 1101.53408      | 734.69181       | L           | 860.52405      | 430.76566       | 287.51287       | 6  |
| 20 | 2330.11946     | 1165.56337      | 777.37800       | Q           | 747.43998      | 374.22363       | 249.81818       | 5  |
| 21 | 2477.18788     | 1239.09758      | 826.40081       | F           | 619.38140      | 310.19434       | 207.13198       | 4  |
| 22 | 2590.27195     | 1295.63961      | 864.09550       | I           | 472.31298      | 236.66013       | 158.10918       | 3  |
| 23 | 2760.37748     | 1380.69238      | 920.79734       | K-Acetyl    | 359.22891      | 180.11809       | 120.41449       | 2  |
| 24 |                |                 |                 | K-Acetyl    | 189.12338      | 95.06533        | 63.71264        | 1  |

Extracted from: Z:\712AB\SK17-S (Ac)\Chichi-Abaumannii-SK17-R-Acetyl\_DrWu\_20140512.raw #19089 RT: 53.78  
 ITMS, CID@35.00, z=+3, Mono m/z=983.50208 Da, MH+=2948.49167 Da, Match Tol.=0.6 Da

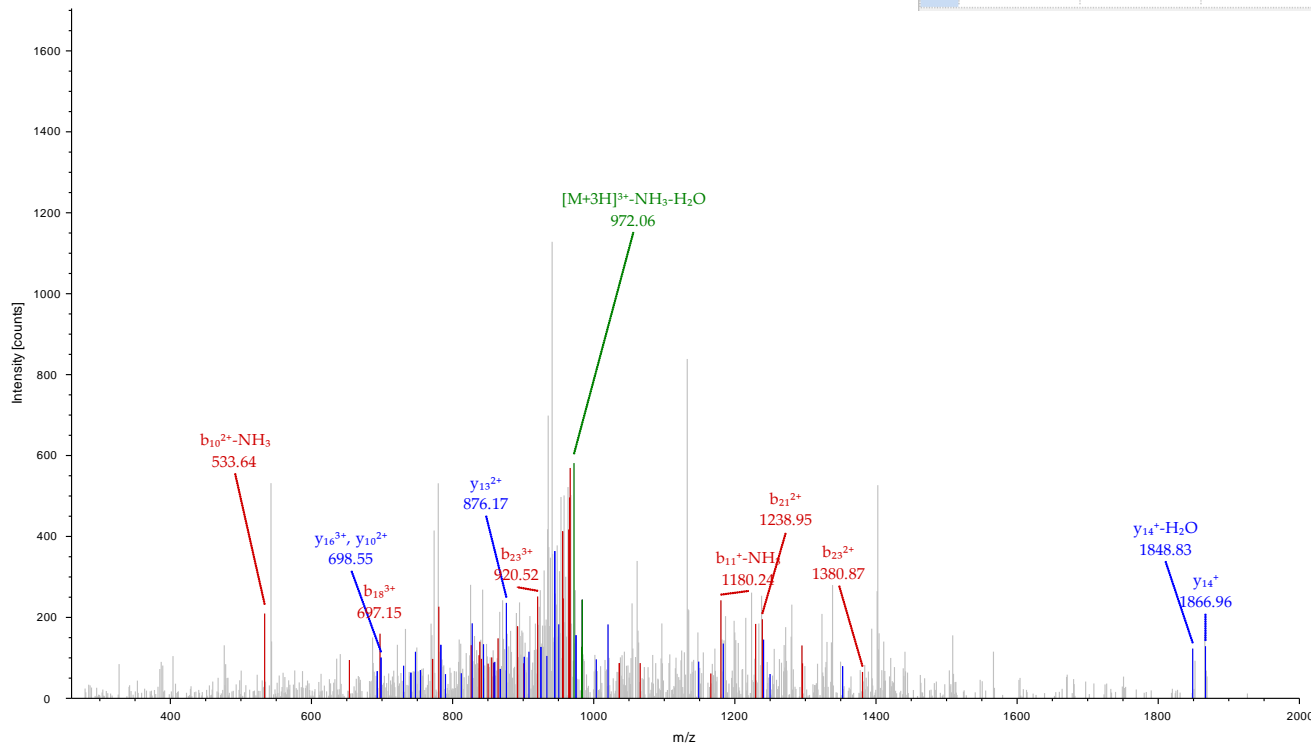



# peg.218 19219

Extracted from: Z:\712AB\SK17-S (Ac)\Chichi-Abaumanni-SK17-S-Acetyl\_DrWu\_20140512.raw #19219 RT: 58.67  
 ITMS, CID@35.00, z=+3, Mono m/z=1004.47760 Da, MH+=3011.41825 Da, Match Tol.=0.6 Da

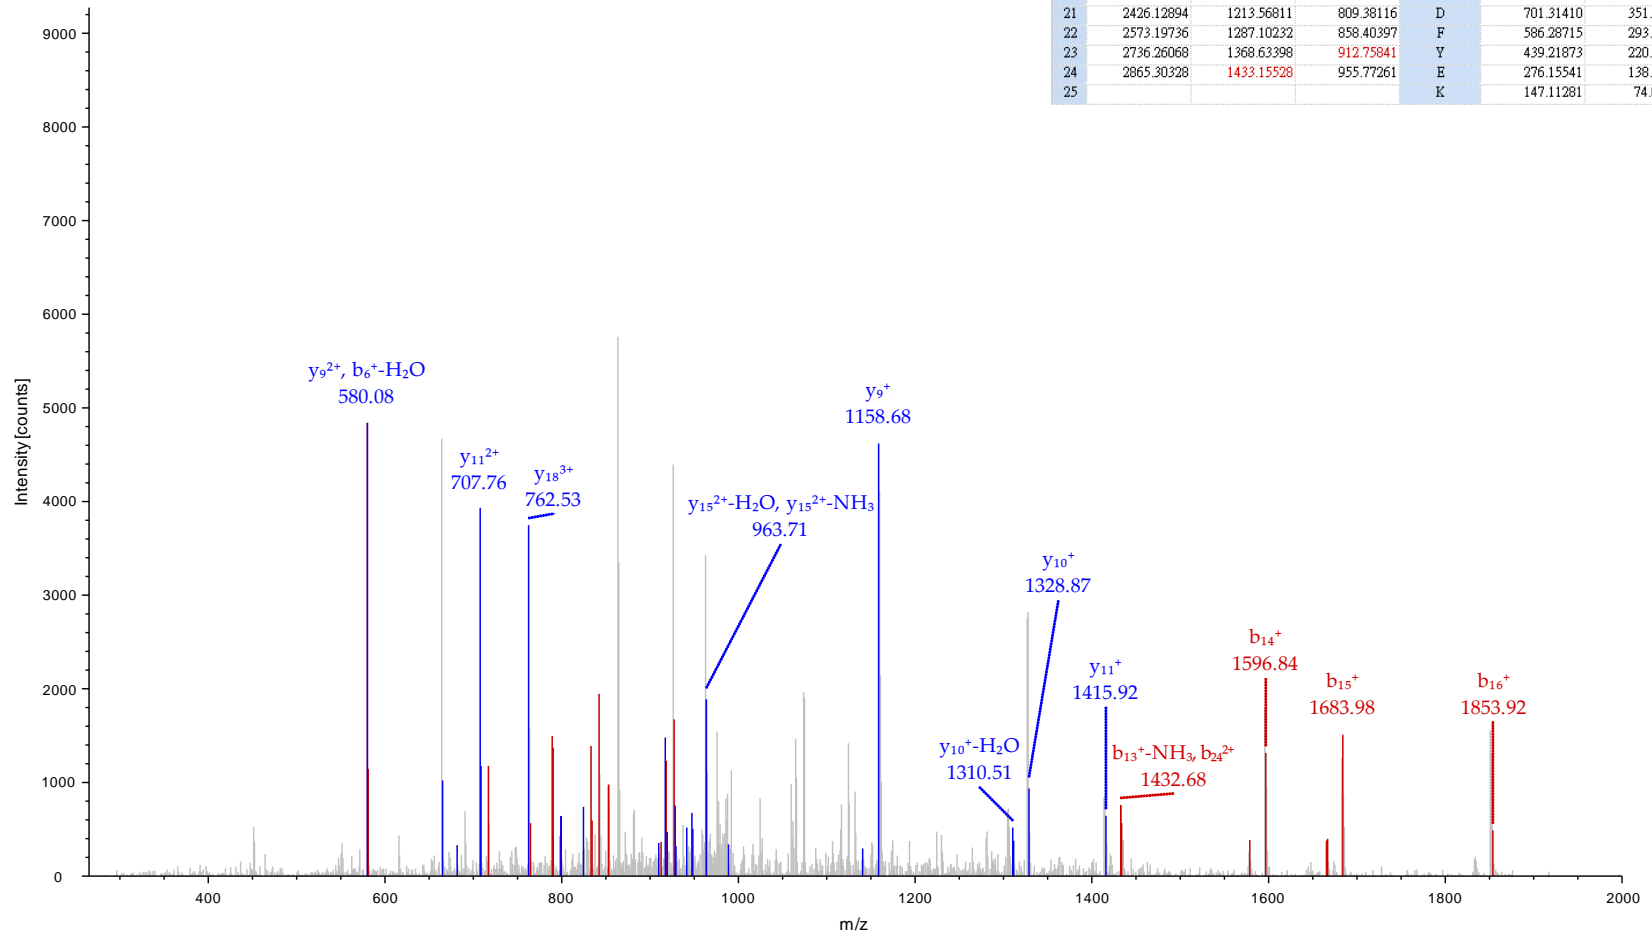

| #1 | b <sup>+</sup> | b <sup>2+</sup> | b <sup>3+</sup> | Seq.        | y <sup>+</sup> | y <sup>2+</sup> | y <sup>3+</sup> | #2 |
|----|----------------|-----------------|-----------------|-------------|----------------|-----------------|-----------------|----|
| 1  | 100.07570      | 50.54149        | 34.03008        | Y           |                |                 |                 | 25 |
| 2  | 171.11282      | 86.06005        | 57.70912        | A           | 2912.34039     | 1456.67383      | 971.45165       | 24 |
| 3  | 284.19689      | 142.60208       | 95.40381        | L           | 2841.30327     | 1421.15527      | 947.77261       | 23 |
| 4  | 412.25547      | 206.63137       | 138.09001       | Q           | 2728.21920     | 1364.61324      | 910.07792       | 22 |
| 5  | 541.29807      | 271.15267       | 181.10421       | E           | 2600.16062     | 1300.58395      | 867.39172       | 21 |
| 6  | 598.31954      | 299.66341       | 200.11136       | G           | 2471.11802     | 1236.06265      | 824.37752       | 20 |
| 7  | 727.36214      | 364.18471       | 243.12556       | E           | 2414.09655     | 1207.55191      | 805.37037       | 19 |
| 8  | 840.44621      | 420.72674       | 280.82025       | I           | 2285.05395     | 1143.03061      | 762.35617       | 18 |
| 9  | 953.53028      | 477.26878       | 318.51494       | I           | 2171.96988     | 1086.48858      | 724.66148       | 17 |
| 10 | 1068.55723     | 534.78225       | 356.85726       | D           | 2058.88581     | 1029.94654      | 686.96679       | 16 |
| 11 | 1155.58926     | 578.29827       | 385.86794       | S           | 1943.85886     | 972.43307       | 648.62447       | 15 |
| 12 | 1302.62467     | 651.81597       | 434.87974       | M-Oxidation | 1856.82683     | 928.91705       | 619.61379       | 14 |
| 13 | 1449.69309     | 725.35018       | 483.90255       | F           | 1709.79142     | 855.39935       | 570.60199       | 13 |
| 14 | 1596.72851     | 798.86789       | 532.91435       | M-Oxidation | 1562.72300     | 781.86514       | 521.57918       | 12 |
| 15 | 1683.76054     | 842.38391       | 561.92503       | S           | 1415.68758     | 708.34743       | 472.56738       | 11 |
| 16 | 1853.86607     | 927.43667       | 618.62687       | K-Acetyl    | 1328.65555     | 664.83141       | 443.55670       | 10 |
| 17 | 2023.97161     | 1012.48944      | 675.32872       | K-Acetyl    | 1158.55002     | 579.77865       | 386.85486       | 9  |
| 18 | 2095.00873     | 1048.00800      | 699.00776       | A           | 988.44448      | 494.72588       | 330.15301       | 8  |
| 19 | 2208.09280     | 1104.55004      | 736.70245       | L           | 917.40736      | 459.20732       | 306.47397       | 7  |
| 20 | 2311.10199     | 1156.05463      | 771.03885       | C           | 804.32329      | 402.66528       | 268.77928       | 6  |
| 21 | 2426.12894     | 1213.56811      | 809.38116       | D           | 701.31410      | 351.16069       | 234.44288       | 5  |
| 22 | 2573.19736     | 1287.10232      | 858.40397       | F           | 586.28715      | 293.64721       | 196.10057       | 4  |
| 23 | 2736.26068     | 1368.63398      | 912.75841       | Y           | 439.21873      | 220.11300       | 147.07776       | 3  |
| 24 | 2865.30328     | 1433.15528      | 955.77261       | E           | 276.15541      | 138.58134       | 92.72332        | 2  |
| 25 |                |                 |                 | K           | 147.11281      | 74.06004        | 49.70912        | 1  |

peg.2229 9120

| #1 | b <sup>+</sup> | b <sup>2+</sup> | b <sup>3+</sup> | Seq.     | y <sup>+</sup> | y <sup>2+</sup> | y <sup>3+</sup> | #2 |
|----|----------------|-----------------|-----------------|----------|----------------|-----------------|-----------------|----|
| 1  | 129.06586      | 65.03657        | 43.69347        | Q        |                |                 |                 | 10 |
| 2  | 258.10846      | 129.55787       | 86.70767        | E        | 1099.68343     | 550.34535       | 367.23266       | 9  |
| 3  | 428.21399      | 214.61063       | 143.40951       | K-Acetyl | 970.64083      | 485.82405       | 324.21846       | 8  |
| 4  | 499.25111      | 250.12919       | 167.08855       | A        | 800.53529      | 400.77128       | 267.51661       | 7  |
| 5  | 586.28314      | 293.64521       | 196.09923       | S        | 729.49817      | 365.25272       | 243.83757       | 6  |
| 6  | 742.38426      | 371.69577       | 248.13294       | R        | 642.46614      | 321.73671       | 214.82690       | 5  |
| 7  | 855.46833      | 428.23780       | 285.82763       | L        | 486.36502      | 243.68615       | 162.79319       | 4  |
| 8  | 968.55240      | 484.77984       | 323.52232       | L        | 373.28095      | 187.14411       | 125.09850       | 3  |
| 9  | 1081.63647     | 541.32187       | 361.21701       | L        | 260.19688      | 130.60208       | 87.40381        | 2  |
| 10 |                |                 |                 | K        | 147.11281      | 74.06004        | 49.70912        | 1  |

Extracted from: Z:\712AB\SK17-S (Ac)Chichi-Abaumannii-SK17-R-Acetyl\_DrWu\_20140703.raw #9120 RT: 30.06  
 ITMS, CID@35.00, z=+3, Mono m/z=409.91583 Da, MH+=1227.73294 Da, Match Tol.=0.6 Da

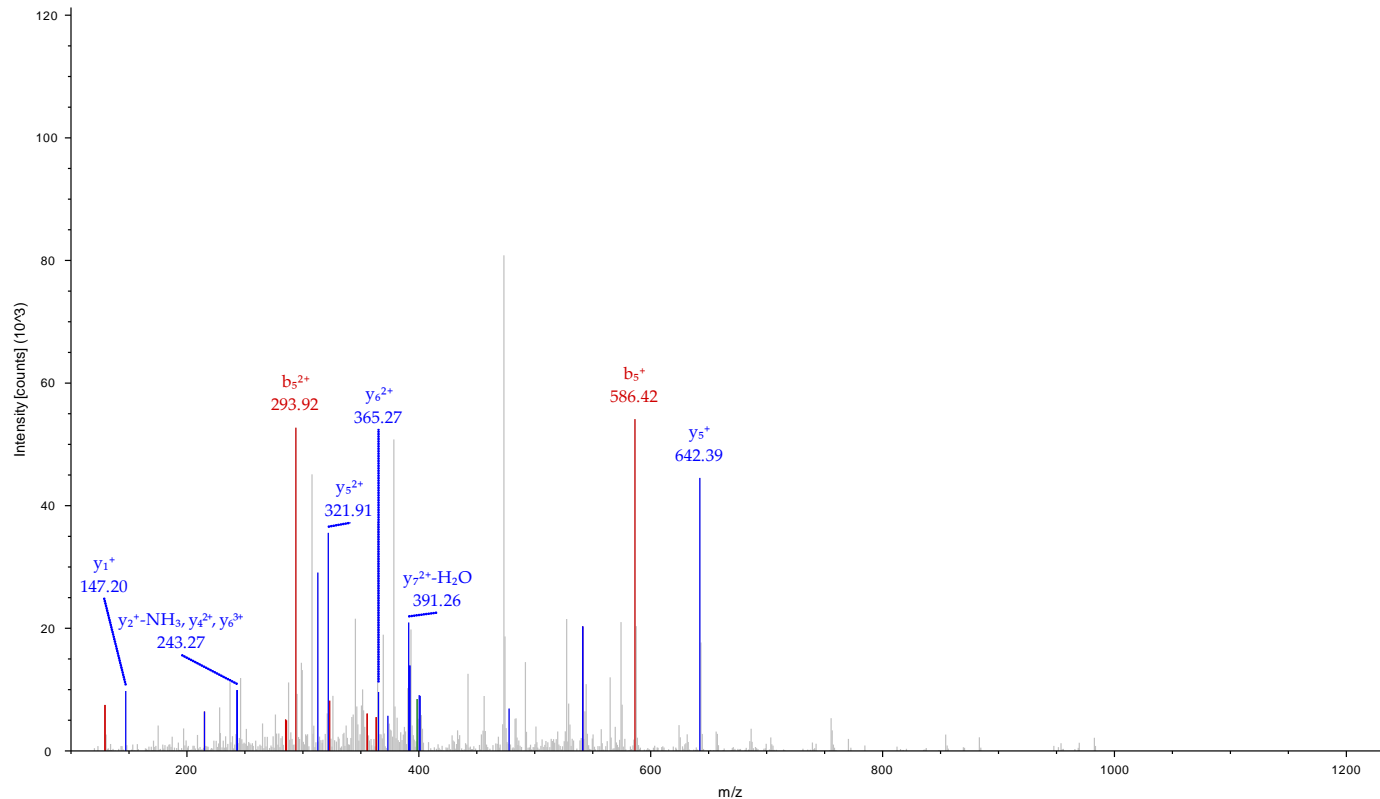

peg.2230 16501

| #1 | b <sup>+</sup> | b <sup>2+</sup> | Seq.        | y <sup>+</sup> | y <sup>2+</sup> | #2 |
|----|----------------|-----------------|-------------|----------------|-----------------|----|
| 1  | 171.11281      | 86.06004        | K-Acetyl    |                |                 | 15 |
| 2  | 228.13428      | 114.57078       | G           | 1529.72652     | 765.36690       | 14 |
| 3  | 315.16631      | 158.08679       | S           | 1472.70505     | 736.85616       | 13 |
| 4  | 386.20343      | 193.60535       | A           | 1385.67302     | 693.34015       | 12 |
| 5  | 500.24636      | 250.62682       | N           | 1314.63590     | 657.82159       | 11 |
| 6  | 629.28896      | 315.14812       | E           | 1200.59297     | 600.80012       | 10 |
| 7  | 743.33189      | 372.16958       | N           | 1071.55037     | 536.27882       | 9  |
| 8  | 871.39047      | 436.19887       | Q           | 957.50744      | 479.25736       | 8  |
| 9  | 970.45889      | 485.73308       | V           | 829.44886      | 415.22807       | 7  |
| 10 | 1083.54296     | 542.27512       | L           | 730.38044      | 365.69386       | 6  |
| 11 | 1230.57838     | 615.79283       | M-Oxidation | 617.29637      | 309.15182       | 5  |
| 12 | 1327.63115     | 664.31921       | P           | 470.26095      | 235.63411       | 4  |
| 13 | 1456.67375     | 728.84051       | E           | 373.20818      | 187.10773       | 3  |
| 14 | 1553.72652     | 777.36690       | P           | 244.16558      | 122.58643       | 2  |
| 15 |                |                 | K           | 147.11281      | 74.06004        | 1  |

Extracted from: Z:\712AB\SK17-S (Ac)\Chichi-Abaumannii-SK17-S-Acetyl\_DrWu\_20140512.raw #16501 RT: 51.48  
 ITMS, CID@35.00, z=+2, Mono m/z=850.41919 Da, MH+=1699.83110 Da, Match Tol.=0.6 Da

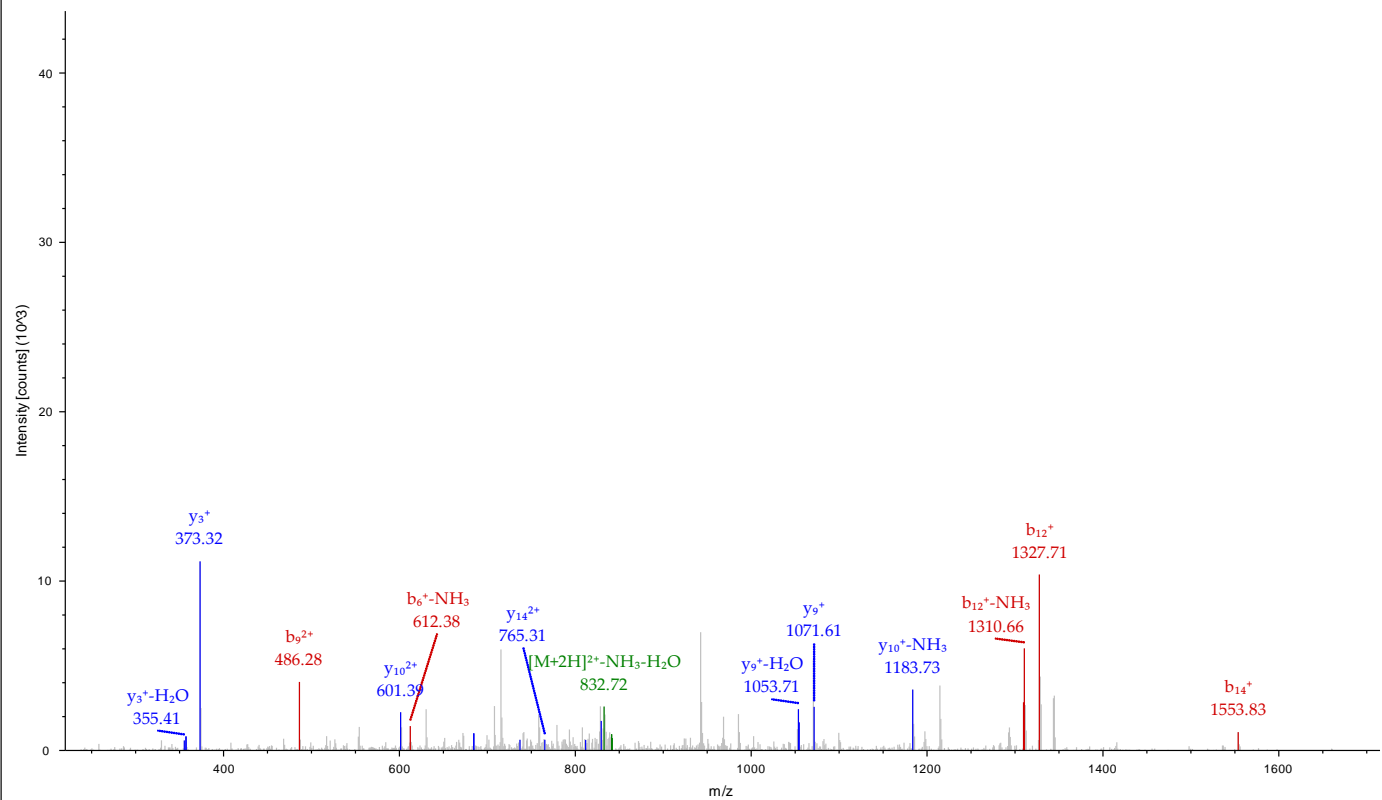

peg.2241 7323

| #1 | b <sup>+</sup> | b <sup>2+</sup> | Seq.     | y <sup>+</sup> | y <sup>2+</sup> | #2 |
|----|----------------|-----------------|----------|----------------|-----------------|----|
| 1  | 172.06044      | 86.53386        | E-Acetyl |                |                 | 13 |
| 2  | 287.08739      | 144.04733       | D        | 1372.73325     | 686.87026       | 12 |
| 3  | 415.14597      | 208.07662       | Q        | 1257.70630     | 629.35679       | 11 |
| 4  | 472.16744      | 236.58736       | G        | 1129.64772     | 565.32750       | 10 |
| 5  | 569.22021      | 285.11374       | P        | 1072.62625     | 536.81676       | 9  |
| 6  | 739.32575      | 370.16651       | K-Acetyl | 975.57348      | 488.29038       | 8  |
| 7  | 810.36287      | 405.68507       | A        | 805.46794      | 403.23761       | 7  |
| 8  | 957.43129      | 479.21928       | F        | 734.43082      | 367.71905       | 6  |
| 9  | 1014.45276     | 507.73002       | G        | 587.36240      | 294.18484       | 5  |
| 10 | 1142.54773     | 571.77750       | K        | 530.34093      | 265.67410       | 4  |
| 11 | 1255.63180     | 628.31954       | L        | 402.24596      | 201.62662       | 3  |
| 12 | 1369.67473     | 685.34100       | N        | 289.16189      | 145.08458       | 2  |
| 13 |                |                 | R        | 175.11896      | 88.06312        | 1  |

Extracted from: Z:\V12AB\SK17-S (Ac)\Chichi-Abaumannii-SK17-R-Acetyl\_DrWu\_20140703.raw #7323 RT: 25.89  
 ITMS, CID@35.00, z=+2, Mono m/z=772.39038 Da, MH+=1543.77349 Da, Match Tol.=0.6 Da

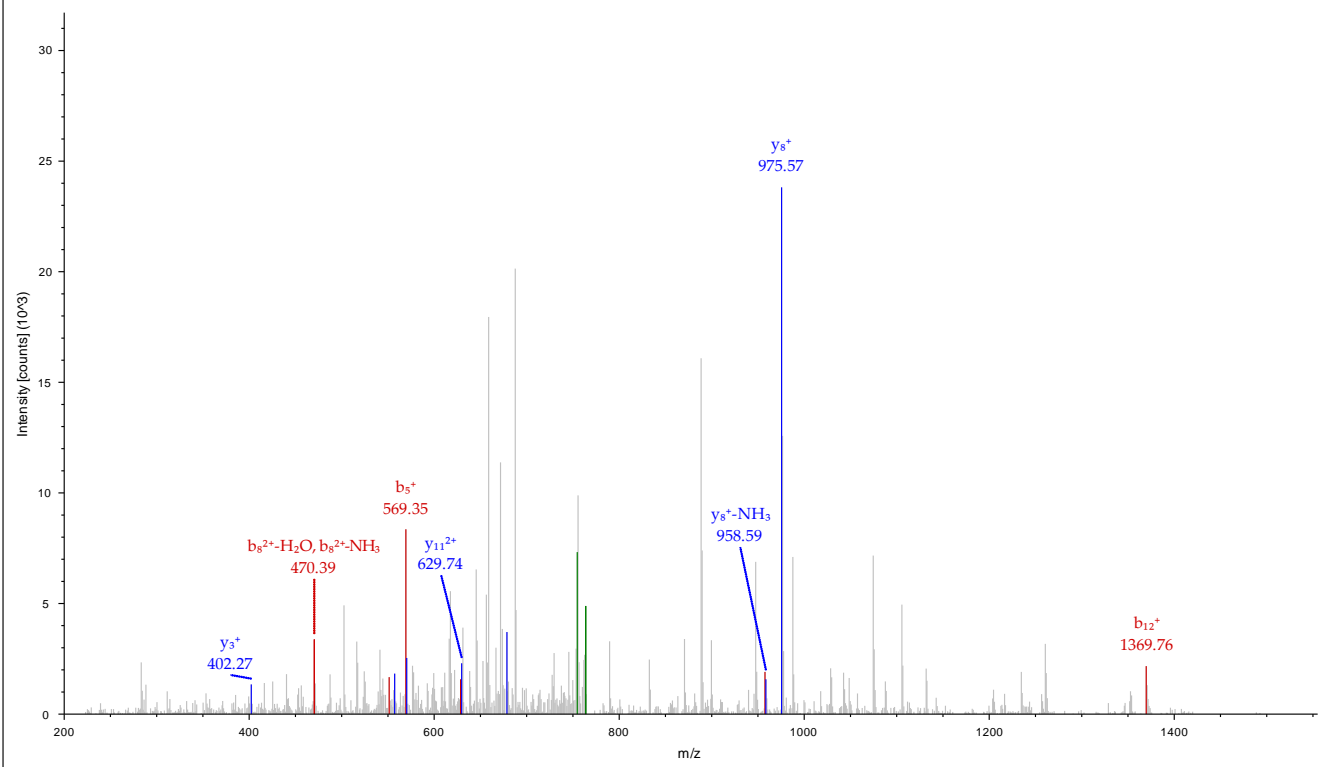

peg.2241 8765

| #1 | b <sup>+</sup> | b <sup>2+</sup> | Seq.     | y <sup>+</sup> | y <sup>2+</sup> | #2 |
|----|----------------|-----------------|----------|----------------|-----------------|----|
| 1  | 172.06044      | 86.53386        | E-Acetyl |                |                 | 13 |
| 2  | 287.08739      | 144.04733       | D        | 1372.73325     | 686.87026       | 12 |
| 3  | 415.14597      | 208.07662       | Q        | 1257.70630     | 629.35679       | 11 |
| 4  | 472.16744      | 236.58736       | G        | 1129.64772     | 565.32750       | 10 |
| 5  | 569.22021      | 285.11374       | P        | 1072.62625     | 536.81676       | 9  |
| 6  | 739.32575      | 370.16651       | K-Acetyl | 975.57348      | 488.29038       | 8  |
| 7  | 810.36287      | 405.68507       | A        | 805.46794      | 403.23761       | 7  |
| 8  | 957.43129      | 479.21928       | F        | 734.43082      | 367.71905       | 6  |
| 9  | 1014.45276     | 507.73002       | G        | 587.36240      | 294.18484       | 5  |
| 10 | 1142.54773     | 571.77750       | K        | 530.34093      | 265.67410       | 4  |
| 11 | 1255.63180     | 628.31954       | L        | 402.24596      | 201.62662       | 3  |
| 12 | 1369.67473     | 685.34100       | N        | 289.16189      | 145.08458       | 2  |
| 13 |                |                 | R        | 175.11896      | 88.06312        | 1  |

Extracted from: Z:\712AB\SK17-S (Ac)\Chichi-Abaumannii-SK17-S-Acetyl\_DrWu\_20140703.raw #8765 RT: 28.42  
 ITMS, CID@35.00, z=+2, Mono m/z=772.38959 Da, MH+=1543.77190 Da, Match Tol.=0.6 Da

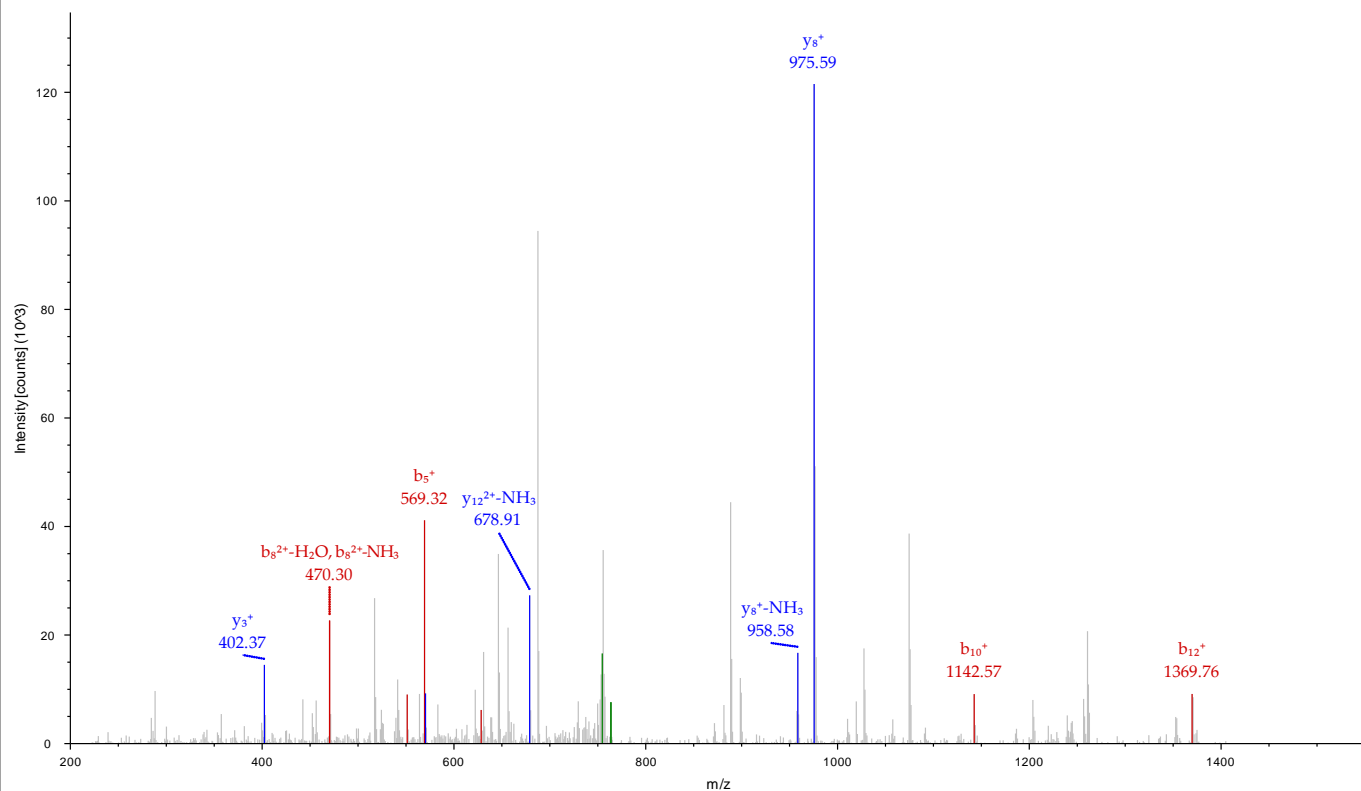

peg.2241 7590

| #1 | b <sup>+</sup> | b <sup>2+</sup> | Seq.     | y <sup>+</sup> | y <sup>2+</sup> | #2 |
|----|----------------|-----------------|----------|----------------|-----------------|----|
| 1  | 172.06044      | 86.53386        | E-Acetyl |                |                 | 13 |
| 2  | 287.08739      | 144.04733       | D        | 1372.73325     | 686.87026       | 12 |
| 3  | 415.14597      | 208.07662       | Q        | 1257.70630     | 629.35679       | 11 |
| 4  | 472.16744      | 236.58736       | G        | 1129.64772     | 565.32750       | 10 |
| 5  | 569.22021      | 285.11374       | P        | 1072.62625     | 536.81676       | 9  |
| 6  | 697.31518      | 349.16123       | K        | 975.57348      | 488.29038       | 8  |
| 7  | 768.35230      | 384.67979       | A        | 847.47851      | 424.24289       | 7  |
| 8  | 915.42072      | 458.21400       | F        | 776.44139      | 388.72433       | 6  |
| 9  | 972.44219      | 486.72473       | G        | 629.37297      | 315.19012       | 5  |
| 10 | 1142.54773     | 571.77750       | K-Acetyl | 572.35150      | 286.67939       | 4  |
| 11 | 1255.63180     | 628.31954       | L        | 402.24596      | 201.62662       | 3  |
| 12 | 1369.67473     | 685.34100       | N        | 289.16189      | 145.08458       | 2  |
| 13 |                |                 | R        | 175.11896      | 88.06312        | 1  |

Extracted from: Z:\712AB\SK17-S (Ac)Chichi-Abaumannii-SK17-S-Acetyl\_DrWu\_20140703.raw #7590 RT: 25.69  
 ITMS, CID@35.00, z=+2, Mono m/z=772.39020 Da, MH+=1543.77312 Da, Match Tol.=0.6 Da

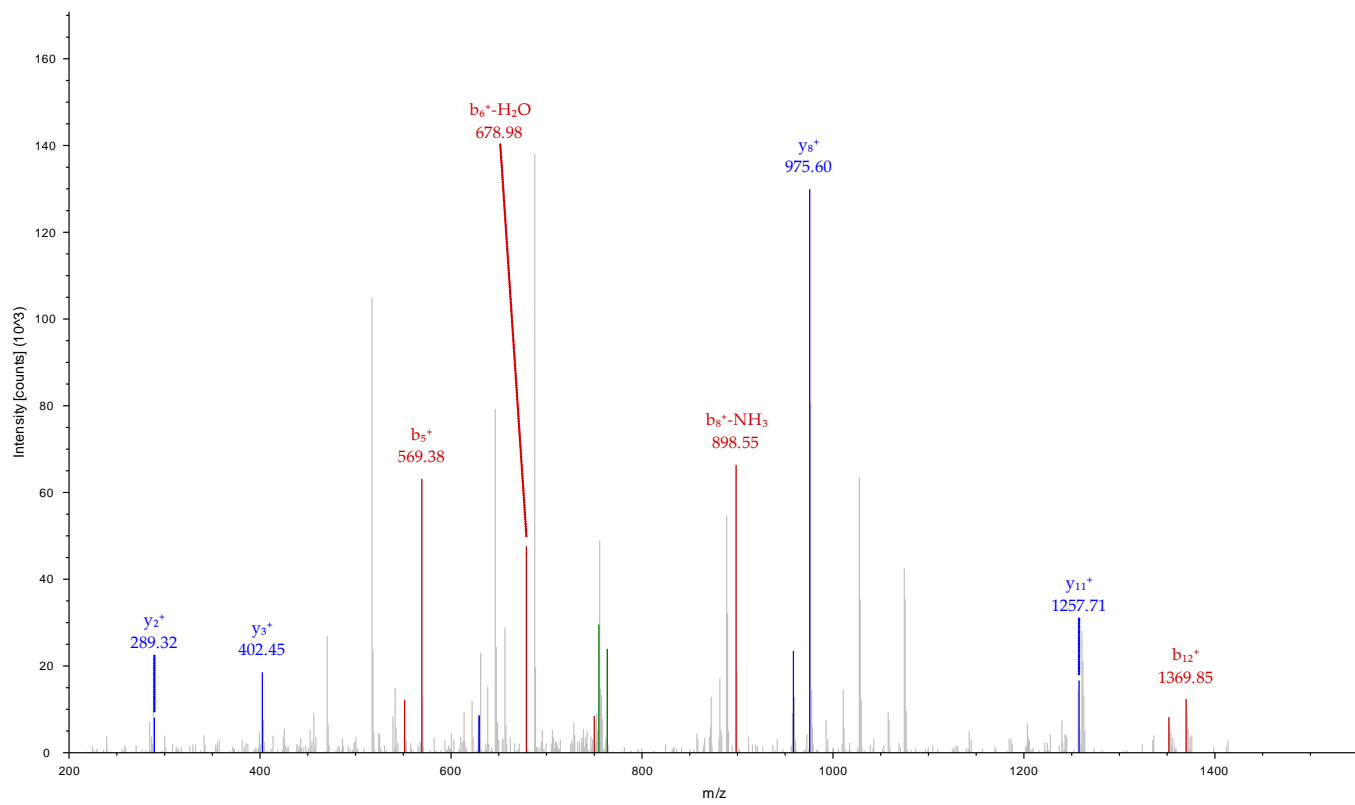

peg.227 14212

| #1 | b <sup>+</sup> | b <sup>2+</sup> | Seq.     | y <sup>+</sup> | y <sup>2+</sup> | #2 |
|----|----------------|-----------------|----------|----------------|-----------------|----|
| 1  | 157.06077      | 79.03402        | N-Acetyl |                |                 | 12 |
| 2  | 271.10370      | 136.05549       | N        | 1349.70600     | 675.35664       | 11 |
| 3  | 399.16228      | 200.08478       | Q        | 1235.66307     | 618.33517       | 10 |
| 4  | 562.22560      | 281.61644       | Y        | 1107.60449     | 554.30588       | 9  |
| 5  | 649.25763      | 325.13245       | S        | 944.54117      | 472.77422       | 8  |
| 6  | 763.30056      | 382.15392       | N        | 857.50914      | 429.25821       | 7  |
| 7  | 876.38463      | 438.69595       | L        | 743.46621      | 372.23674       | 6  |
| 8  | 1046.49017     | 523.74872       | K-Acetyl | 630.38214      | 315.69471       | 5  |
| 9  | 1117.52729     | 559.26728       | A        | 460.27660      | 230.64194       | 4  |
| 10 | 1230.61136     | 615.80932       | L        | 389.23948      | 195.12338       | 3  |
| 11 | 1359.65396     | 680.33062       | E        | 276.15541      | 138.58134       | 2  |
| 12 |                |                 | K        | 147.11281      | 74.06004        | 1  |

Extracted from: Z:\V12\AB\SK17-S (Ac)\Chichi-Abaumannii-SK17-R-Acetyl\_DrWu\_20140512.raw #14212 RT: 41.22  
 ITMS, CID@35.00, z=+2, Mono m/z=753.38312 Da, MH+=1505.75896 Da, Match Tol.=0.6 Da

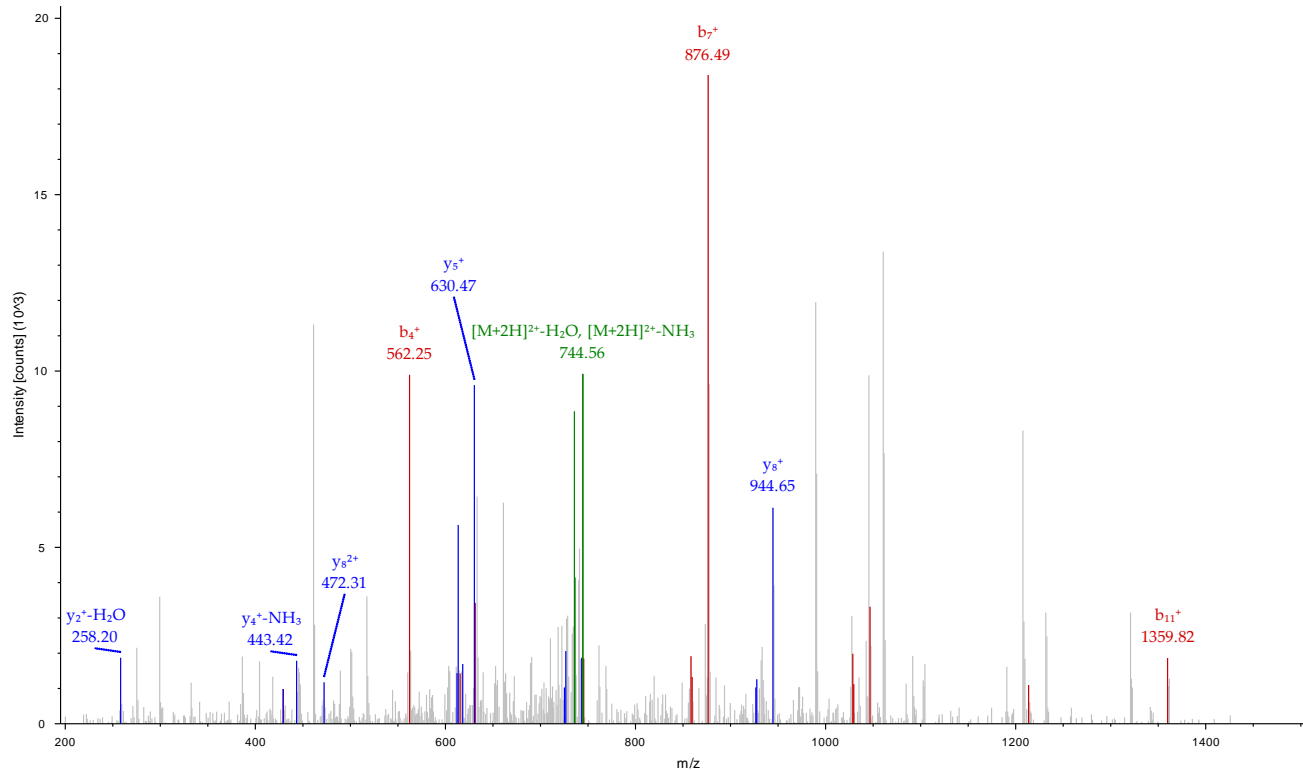

peg.227 12534

| #1 | b <sup>+</sup> | b <sup>2+</sup> | Seq.     | y <sup>+</sup> | y <sup>2+</sup> | #2 |
|----|----------------|-----------------|----------|----------------|-----------------|----|
| 1  | 157.06077      | 79.03402        | N-Acetyl |                |                 | 12 |
| 2  | 271.10370      | 136.05549       | N        | 1349.70600     | 675.35664       | 11 |
| 3  | 399.16228      | 200.08478       | Q        | 1235.66307     | 618.33517       | 10 |
| 4  | 562.22560      | 281.61644       | Y        | 1107.60449     | 554.30588       | 9  |
| 5  | 649.25763      | 325.13245       | S        | 944.54117      | 472.77422       | 8  |
| 6  | 763.30056      | 382.15392       | N        | 857.50914      | 429.25821       | 7  |
| 7  | 876.38463      | 438.69595       | L        | 743.46621      | 372.23674       | 6  |
| 8  | 1046.49017     | 523.74872       | K-Acetyl | 630.38214      | 315.69471       | 5  |
| 9  | 1117.52729     | 559.26728       | A        | 460.27660      | 230.64194       | 4  |
| 10 | 1230.61136     | 615.80932       | L        | 389.23948      | 195.12338       | 3  |
| 11 | 1359.65396     | 680.33062       | E        | 276.15541      | 138.58134       | 2  |
| 12 |                |                 | K        | 147.11281      | 74.06004        | 1  |

Extracted from: Z:\712AB\SK17-S (Ac)\Chichi-Abaumannii-SK17-S-Acetyl\_DrWu\_20140512.raw #12534 RT: 41.27  
 ITMS, CID@35.00, z=+2, Mono m/z=753.38147 Da, MH+=1505.75566 Da, Match Tol.=0.6 Da

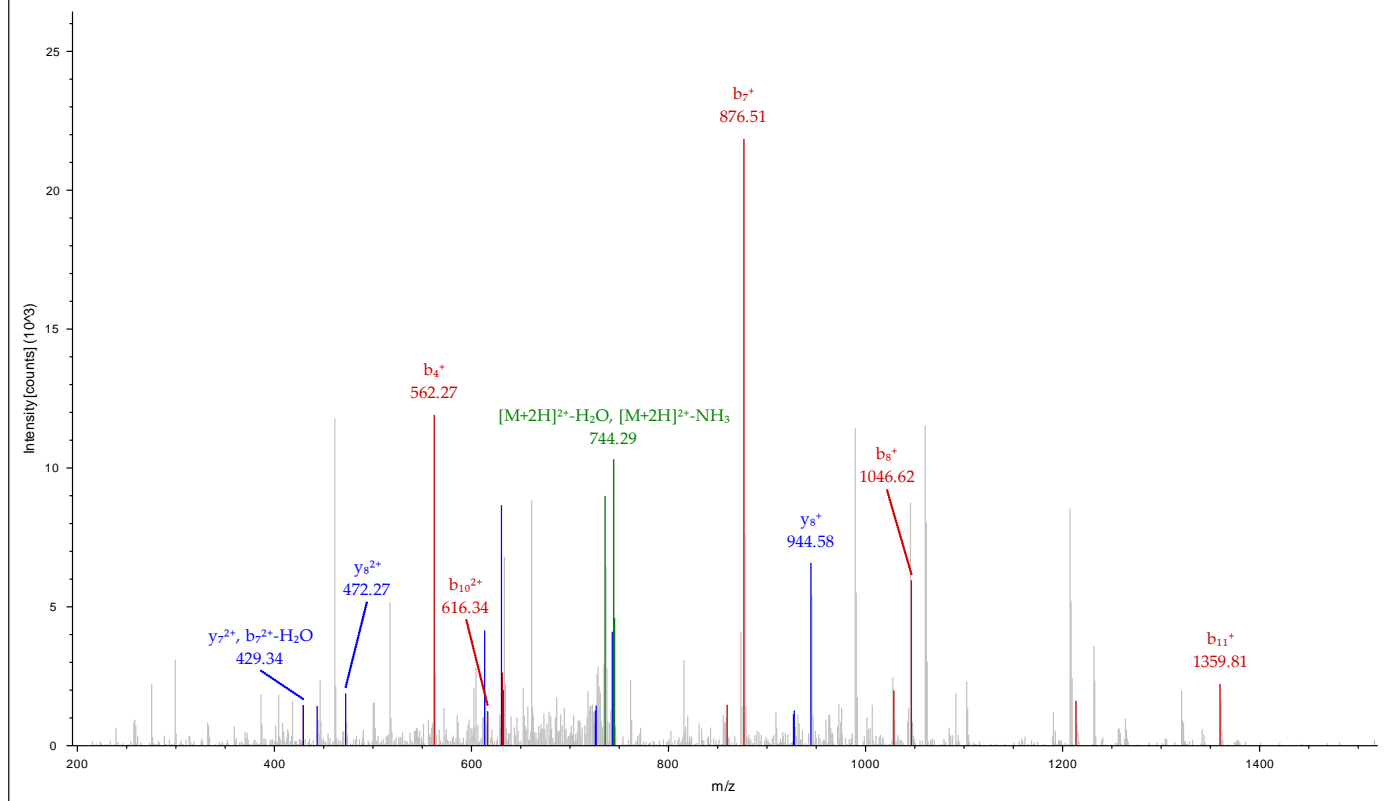



peg.2279 9452

| #1 | b <sup>+</sup> | b <sup>2+</sup> | Seq.     | y <sup>+</sup> | y <sup>2+</sup> | #2 |
|----|----------------|-----------------|----------|----------------|-----------------|----|
| 1  | 171.11281      | 86.06004        | K-Acetyl |                |                 | 10 |
| 2  | 327.21393      | 164.11060       | R        | 987.55822      | 494.28275       | 9  |
| 3  | 384.23540      | 192.62134       | G        | 831.45710      | 416.23219       | 8  |
| 4  | 471.26743      | 236.13735       | S        | 774.43563      | 387.72145       | 7  |
| 5  | 570.33585      | 285.67156       | V        | 687.40360      | 344.20544       | 6  |
| 6  | 657.36788      | 329.18758       | S        | 588.33518      | 294.67123       | 5  |
| 7  | 786.41048      | 393.70888       | E        | 501.30315      | 251.15521       | 4  |
| 8  | 914.50545      | 457.75636       | K        | 372.26055      | 186.63391       | 3  |
| 9  | 1011.55822     | 506.28275       | P        | 244.16558      | 122.58643       | 2  |
| 10 |                |                 | K        | 147.11281      | 74.06004        | 1  |

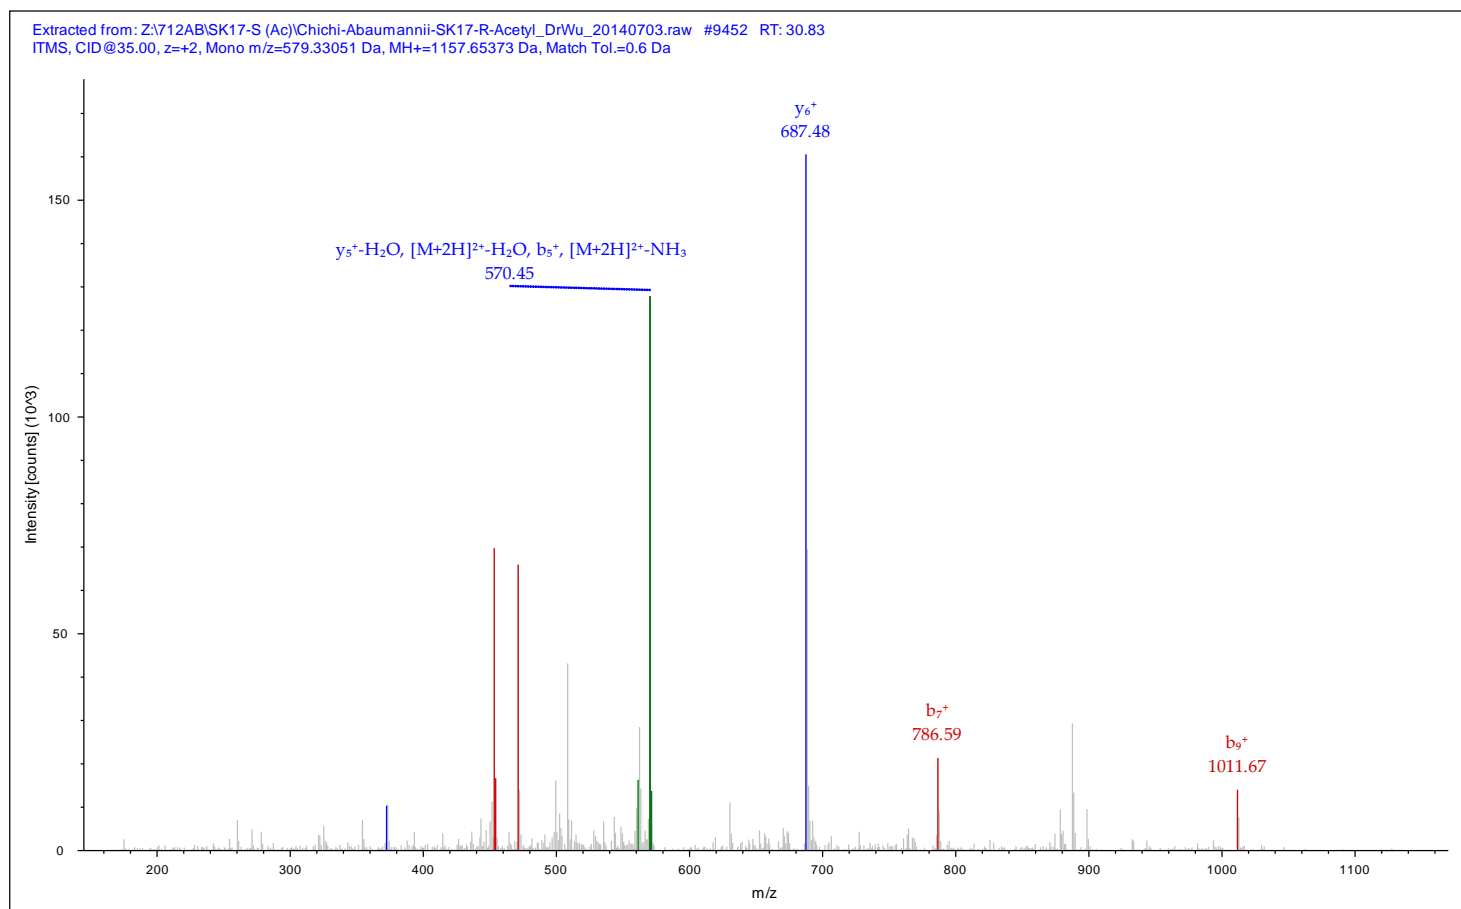

peg.2279 8667

| #1 | b <sup>+</sup> | b <sup>2+</sup> | Seq.     | y <sup>+</sup> | y <sup>2+</sup> | #2 |
|----|----------------|-----------------|----------|----------------|-----------------|----|
| 1  | 171.11281      | 86.06004        | K-Acetyl |                |                 | 10 |
| 2  | 327.21393      | 164.11060       | R        | 987.55822      | 494.28275       | 9  |
| 3  | 384.23540      | 192.62134       | G        | 831.45710      | 416.23219       | 8  |
| 4  | 471.26743      | 236.13735       | S        | 774.43563      | 387.72145       | 7  |
| 5  | 570.33585      | 285.67156       | V        | 687.40360      | 344.20544       | 6  |
| 6  | 657.36788      | 329.18758       | S        | 588.33518      | 294.67123       | 5  |
| 7  | 786.41048      | 393.70888       | E        | 501.30315      | 251.15521       | 4  |
| 8  | 914.50545      | 457.75636       | K        | 372.26055      | 186.63391       | 3  |
| 9  | 1011.55822     | 506.28275       | P        | 244.16558      | 122.58643       | 2  |
| 10 |                |                 | K        | 147.11281      | 74.06004        | 1  |

Extracted from: Z:\712AB\SK17-S (Ac)Chichi-Abaumannii-SK17-S-Acetyl\_DrWu\_20140512.raw #8667 RT: 31.64  
ITMS, CID@35.00, z=+2, Mono m/z=579.32977 Da, MH+=1157.65227 Da, Match Tol.=0.6 Da

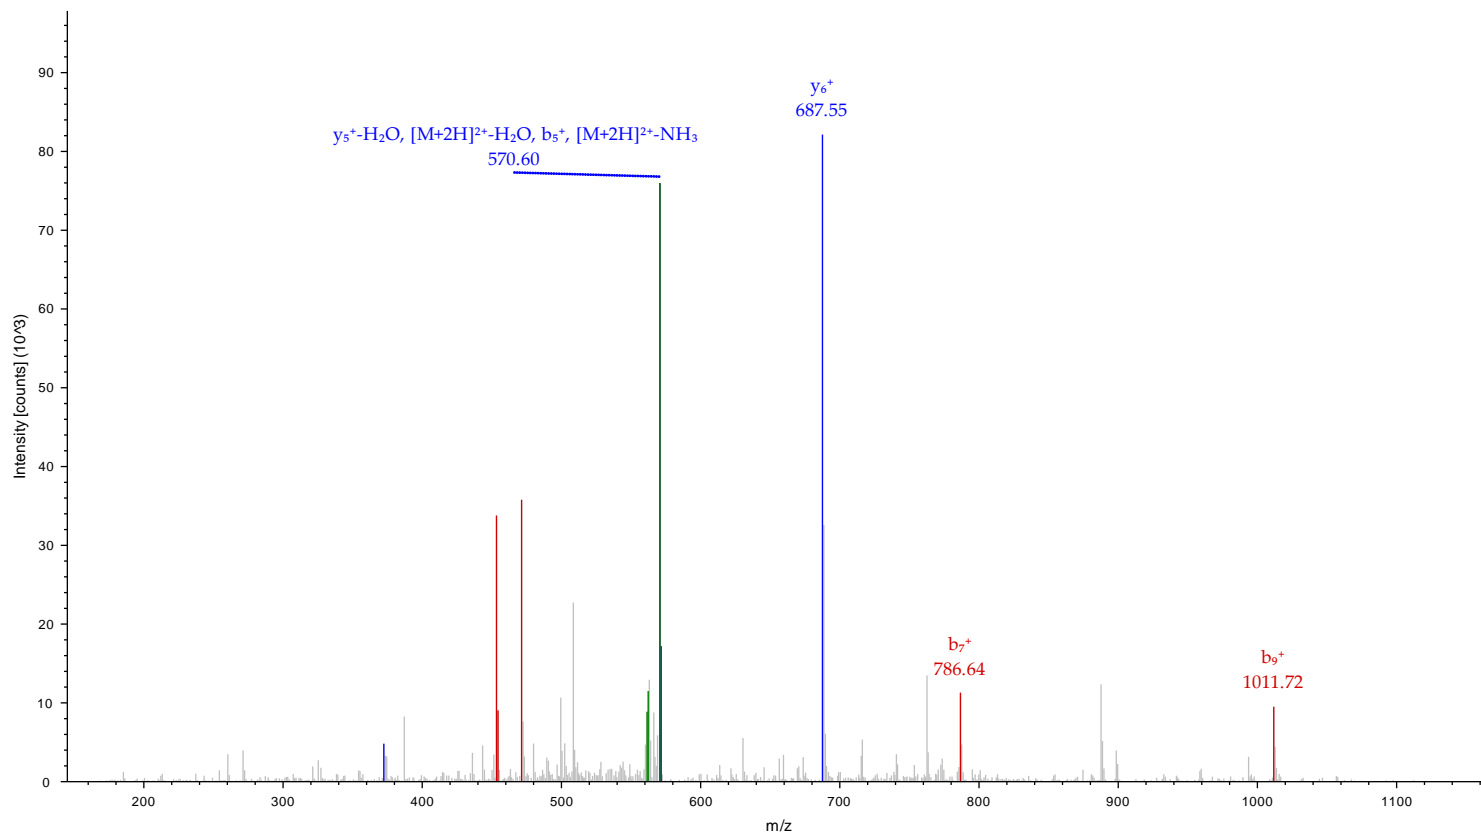

peg.229 13074

| #1 | b <sup>+</sup> | b <sup>2+</sup> | Seq.     | y <sup>+</sup> | y <sup>2+</sup> | #2 |
|----|----------------|-----------------|----------|----------------|-----------------|----|
| 1  | 164.07060      | 82.53894        | Y        |                |                 | 8  |
| 2  | 292.12918      | 146.56823       | Q        | 843.50472      | 422.25600       | 7  |
| 3  | 420.18776      | 210.59752       | Q        | 715.44614      | 358.22671       | 6  |
| 4  | 491.22488      | 246.11608       | A        | 587.38756      | 294.19742       | 5  |
| 5  | 619.31985      | 310.16356       | K        | 516.35044      | 258.67886       | 4  |
| 6  | 789.42538      | 395.21633       | K-Acetyl | 388.25547      | 194.63137       | 3  |
| 7  | 860.46250      | 430.73489       | A        | 218.14993      | 109.57860       | 2  |
| 8  |                |                 | K        | 147.11281      | 74.06004        | 1  |

Extracted from: Z:\712AB\SK17-S (Ac)\Chichi-Abaumannii-SK17-S-Acetyl\_DrWu\_20140703.raw #13074 RT: 38.56  
ITMS, CID@35.00, z=+2, Mono m/z=503.78302 Da, MH+=1006.55876 Da, Match Tol.=0.6 Da

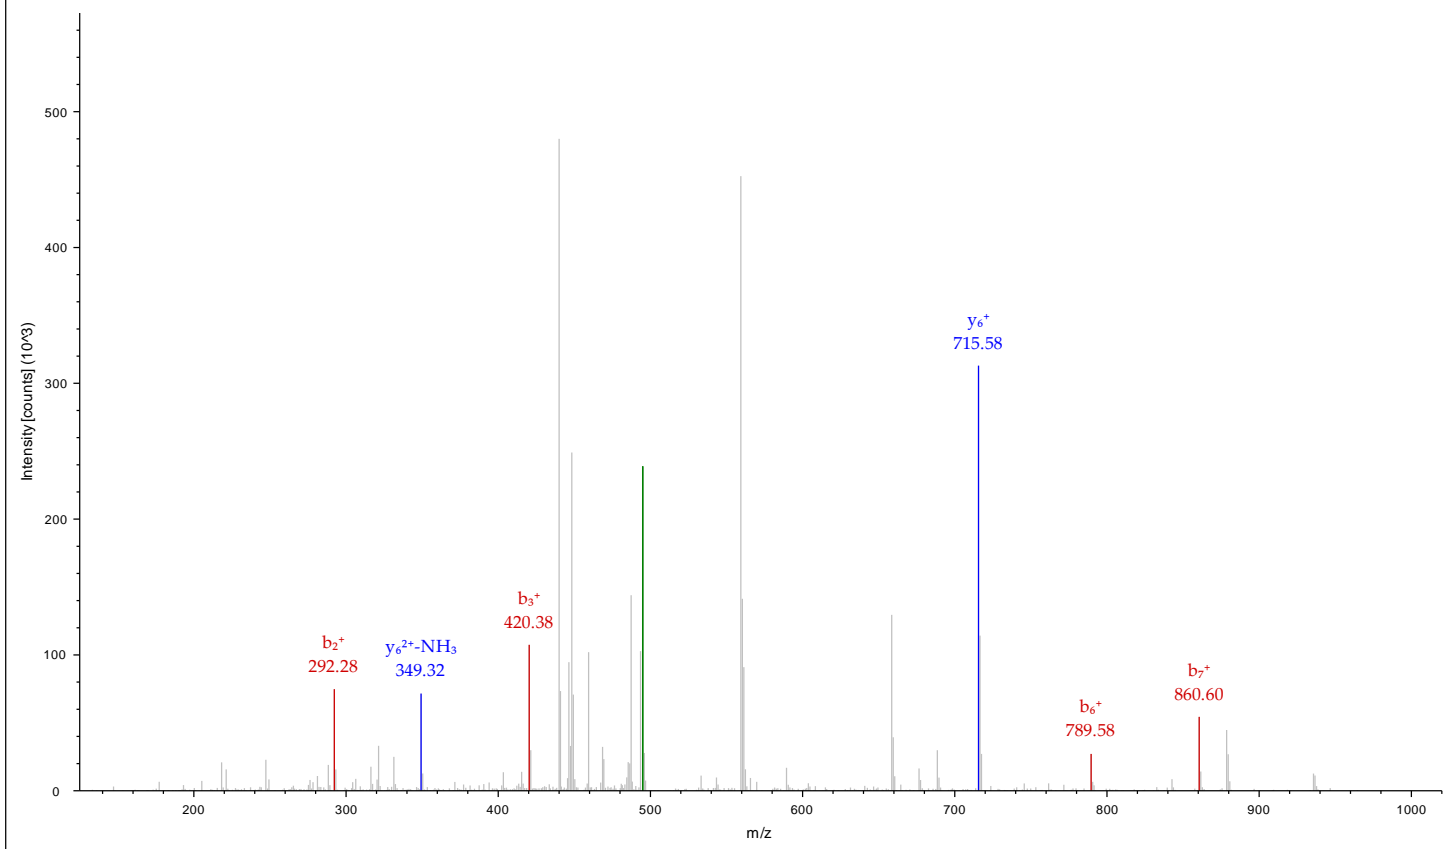

| #1 | b <sup>+</sup> | b <sup>2+</sup> | b <sup>3+</sup> | Seq.        | y <sup>+</sup> | y <sup>2+</sup> | y <sup>3+</sup> | #2 |
|----|----------------|-----------------|-----------------|-------------|----------------|-----------------|-----------------|----|
| 1  | 114.09135      | 57.54931        | 38.70197        | I           |                |                 |                 | 28 |
| 2  | 229.11830      | 115.06279       | 77.04428        | D           | 3295.49975     | 1648.25351      | 1099.17143      | 27 |
| 3  | 316.15033      | 158.57880       | 106.05496       | S           | 3180.47280     | 1590.74004      | 1060.82912      | 26 |
| 4  | 417.19801      | 209.10264       | 139.73752       | T           | 3093.44077     | 1547.22402      | 1031.81844      | 25 |
| 5  | 603.27733      | 302.14230       | 201.76396       | W           | 2992.39309     | 1496.70018      | 998.13588       | 24 |
| 6  | 766.34065      | 383.67396       | 256.11840       | Y           | 2806.31377     | 1403.66052      | 936.10944       | 23 |
| 7  | 913.37606      | 457.19167       | 305.13020       | M-Oxidation | 2643.25045     | 1322.12886      | 881.75500       | 22 |
| 8  | 1026.46013     | 513.73370       | 342.82489       | I           | 2496.21503     | 1248.61115      | 832.74319       | 21 |
| 9  | 1123.51290     | 562.26009       | 375.17582       | P           | 2383.13096     | 1192.06912      | 795.04850       | 20 |
| 10 | 1252.55550     | 626.78139       | 418.19002       | E           | 2286.07819     | 1143.54273      | 762.69758       | 19 |
| 11 | 1339.58753     | 670.29740       | 447.20069       | S           | 2157.03559     | 1079.02143      | 719.68338       | 18 |
| 12 | 1426.61956     | 713.81342       | 476.21137       | S           | 2070.00356     | 1035.50542      | 690.67270       | 17 |
| 13 | 1497.65668     | 749.33198       | 499.89041       | A           | 1982.97153     | 991.98940       | 661.66203       | 16 |
| 14 | 1611.69961     | 806.35344       | 537.90472       | N           | 1911.93441     | 956.47084       | 637.98299       | 15 |
| 15 | 1781.80515     | 891.40621       | 594.60657       | K-Acetyl    | 1797.89148     | 899.44938       | 599.96868       | 14 |
| 16 | 1882.85283     | 941.93005       | 628.28913       | T           | 1627.78595     | 814.39661       | 543.26683       | 13 |
| 17 | 1995.93690     | 998.47209       | 665.98382       | I           | 1526.73827     | 763.87277       | 509.58427       | 12 |
| 18 | 2124.97950     | 1062.99339      | 708.99802       | E           | 1413.65420     | 707.33074       | 471.88958       | 11 |
| 19 | 2238.06357     | 1119.53542      | 746.69271       | L           | 1284.61160     | 642.80944       | 428.87538       | 10 |
| 20 | 2424.14289     | 1212.57508      | 808.71915       | W           | 1171.52753     | 586.26740       | 391.18069       | 9  |
| 21 | 2552.23786     | 1276.62257      | 851.41747       | K           | 985.44821      | 493.22774       | 329.15425       | 8  |
| 22 | 2655.24705     | 1328.12716      | 885.75387       | C           | 857.35324      | 429.18026       | 286.45593       | 7  |
| 23 | 2756.29473     | 1378.65100      | 919.43643       | T           | 754.34405      | 377.67566       | 252.11953       | 6  |
| 24 | 2871.32168     | 1436.16448      | 957.77874       | D           | 653.29637      | 327.15182       | 218.43697       | 5  |
| 25 | 3018.39010     | 1509.69869      | 1006.80155      | F           | 538.26942      | 269.63835       | 180.09466       | 4  |
| 26 | 3115.44287     | 1558.22507      | 1039.15247      | P           | 391.20100      | 196.10414       | 131.07185       | 3  |
| 27 | 3262.47828     | 1631.74278      | 1088.16428      | M-Oxidation | 294.14823      | 147.57775       | 98.72093        | 2  |
| 28 |                |                 |                 | K           | 147.11281      | 74.06004        | 49.70912        | 1  |

Extracted from: Z:\712\AB\ISK17-S (Ac)\Chichi-Abaumanni-SK17-S-Acetyl\_Dr\Wu\_20140703.raw #26428 RT: 72.40  
 IMS, CID@35.00, z=+3, Mono m/z=1136.85999 Da, MH+=3408.56540 Da, Match Tol.=0.6 Da

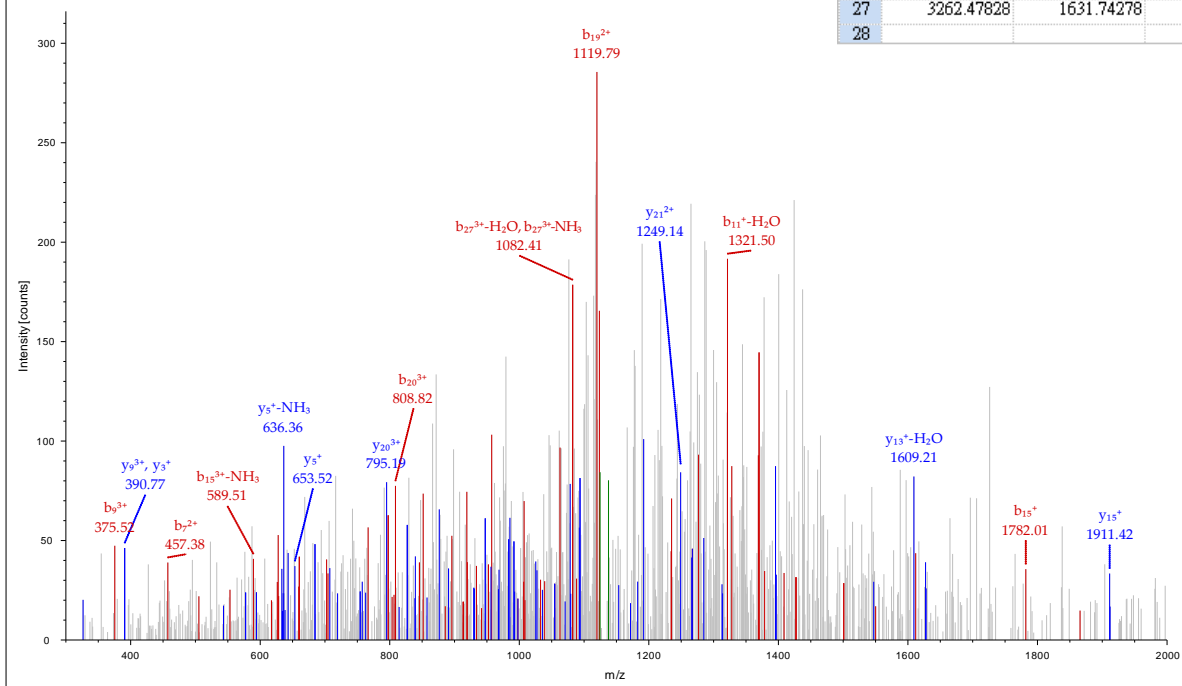

peg.2332 19099

| #1 | b <sup>+</sup> | b <sup>2+</sup> | Seq.     | y <sup>+</sup> | y <sup>2+</sup> | #2 |
|----|----------------|-----------------|----------|----------------|-----------------|----|
| 1  | 157.10840      | 79.05784        | R        |                |                 | 14 |
| 2  | 228.14552      | 114.57640       | A        | 1440.78060     | 720.89394       | 13 |
| 3  | 343.17247      | 172.08987       | D        | 1369.74348     | 685.37538       | 12 |
| 4  | 457.21540      | 229.11134       | N        | 1254.71653     | 627.86190       | 11 |
| 5  | 572.24235      | 286.62481       | D        | 1140.67360     | 570.84044       | 10 |
| 6  | 685.32642      | 343.16685       | I        | 1025.64665     | 513.32696       | 9  |
| 7  | 756.36354      | 378.68541       | A        | 912.56258      | 456.78493       | 8  |
| 8  | 869.44761      | 435.22744       | I        | 841.52546      | 421.26637       | 7  |
| 9  | 940.48473      | 470.74600       | A        | 728.44139      | 364.72433       | 6  |
| 10 | 1110.59026     | 555.79877       | K-Acetyl | 657.40427      | 329.20577       | 5  |
| 11 | 1238.64884     | 619.82806       | Q        | 487.29873      | 244.15300       | 4  |
| 12 | 1309.68596     | 655.34662       | A        | 359.24015      | 180.12371       | 3  |
| 13 | 1422.77003     | 711.88865       | L        | 288.20303      | 144.60515       | 2  |
| 14 |                |                 | R        | 175.11896      | 88.06312        | 1  |

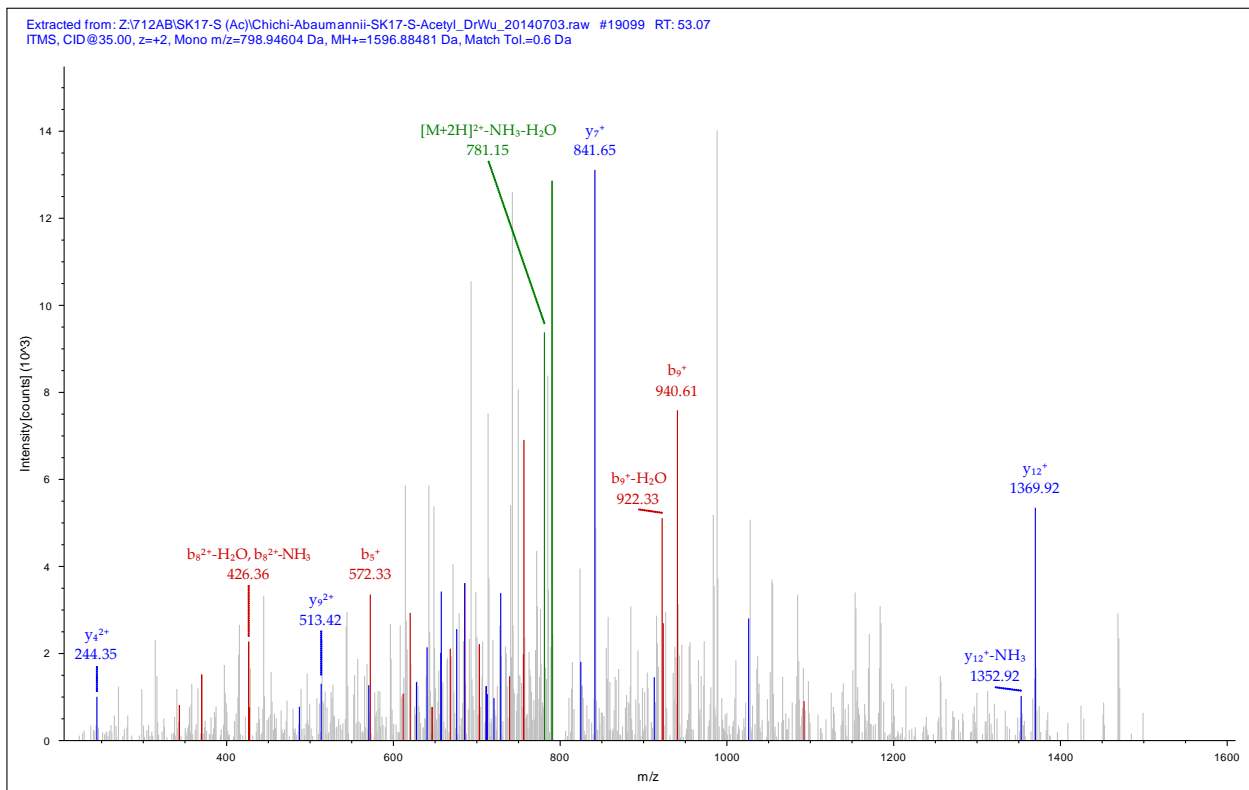

# peg.2396 17900

## Peptide Summary

Sequence: SELIDAIAEKGGVSK, K10-Acetyl (42.01057 Da)  
 Charge: +2, Monoisotopic m/z: 779.91846 Da (-1.37 mmu/-1.75 ppm), MH+: 1558.82964 Da, RT: 50.54 min,  
 Identified with: Mascot (v1.30); IonScore:75, Exp Value:1.6E-007, Ions matched by search engine: 17/148  
 Fragment match tolerance used for search: 0.6 Da

| #1 | b <sup>+</sup> | b <sup>2+</sup> | Seq.     | y <sup>+</sup> | y <sup>2+</sup> | #2 |
|----|----------------|-----------------|----------|----------------|-----------------|----|
| 1  | 88.03931       | 44.52329        | S        |                |                 | 15 |
| 2  | 217.08191      | 109.04459       | E        | 1471.80034     | 736.40381       | 14 |
| 3  | 330.16598      | 165.58663       | L        | 1342.75774     | 671.88251       | 13 |
| 4  | 443.25005      | 222.12866       | I        | 1229.67367     | 615.34047       | 12 |
| 5  | 558.27700      | 279.64214       | D        | 1116.58960     | 558.79844       | 11 |
| 6  | 629.31412      | 315.16070       | A        | 1001.56265     | 501.28496       | 10 |
| 7  | 742.39819      | 371.70273       | I        | 930.52553      | 465.76640       | 9  |
| 8  | 813.43531      | 407.22129       | A        | 817.44146      | 409.22437       | 8  |
| 9  | 942.47791      | 471.74259       | E        | 746.40434      | 373.70581       | 7  |
| 10 | 1112.58344     | 556.79536       | K-Acetyl | 617.36174      | 309.18451       | 6  |
| 11 | 1169.60491     | 585.30609       | G        | 447.25620      | 224.13174       | 5  |
| 12 | 1226.62638     | 613.81683       | G        | 390.23473      | 195.62100       | 4  |
| 13 | 1325.69480     | 663.35104       | V        | 333.21326      | 167.11027       | 3  |
| 14 | 1412.72683     | 706.86705       | S        | 234.14484      | 117.57606       | 2  |
| 15 |                |                 | K        | 147.11281      | 74.06004        | 1  |

Extracted from: Z:\712AB\SK17-S (Ac)\Chichi-Abaumannii-SK17-R-Acetyl\_DrWu\_20140512.raw #17900 RT: 50.54  
 ITMS, CID@35.00, z=+2, Mono m/z=779.91846 Da, MH+=1558.82964 Da, Match Tol.=0.6 Da

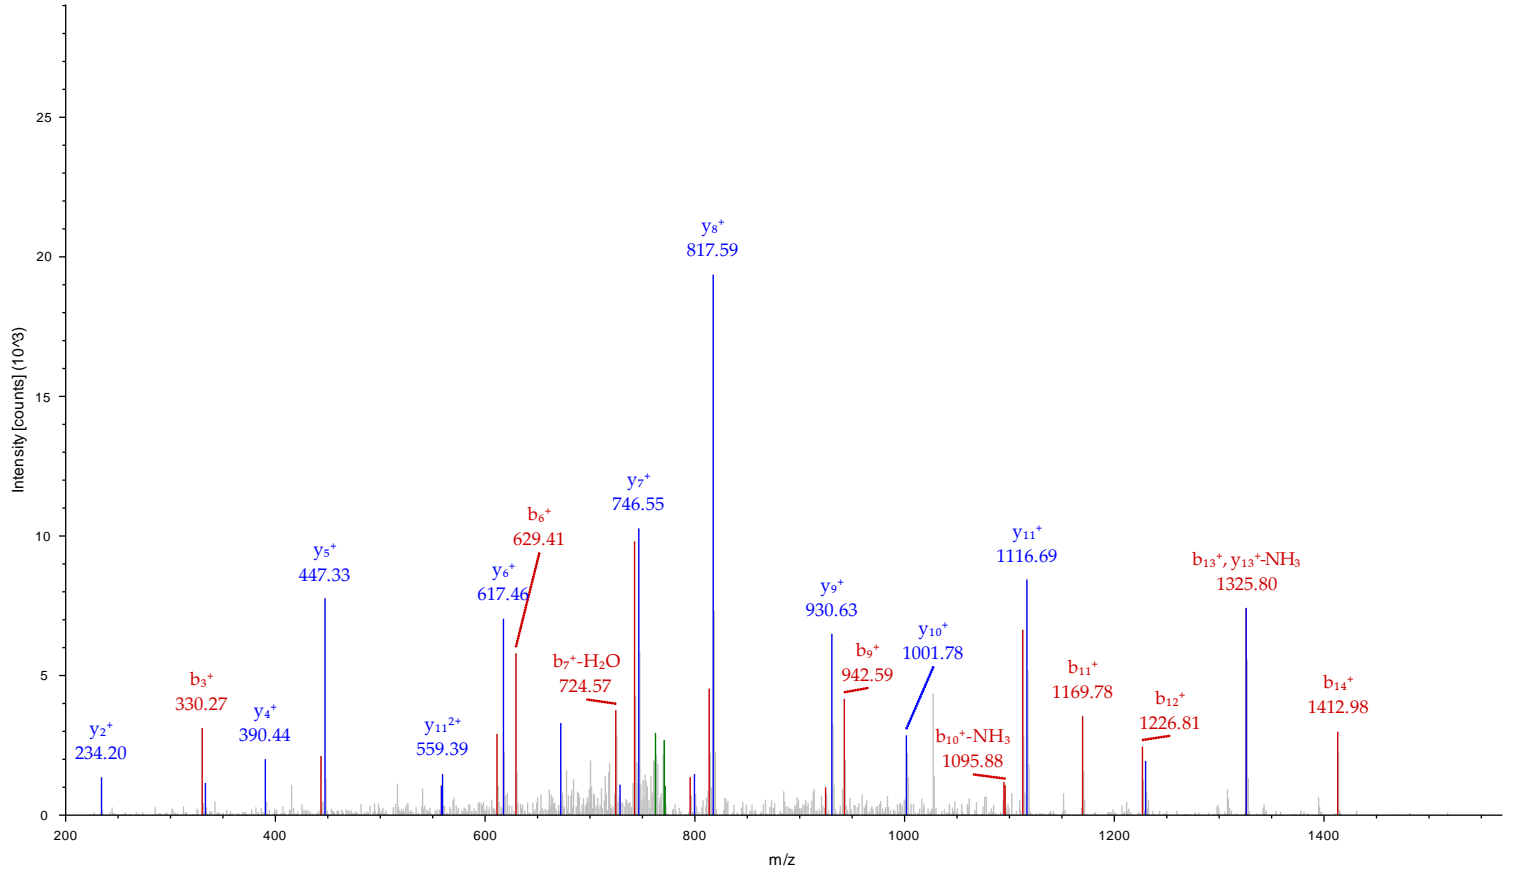

peg.2396 15971

Peptide Summary

Sequence: SELIDAIAEKGGVSK, K10-Acetyl (42.01057 Da)  
 Charge: +2, Monoisotopic m/z: 779.91833 Da (-1.49 mmu/-1.91 ppm), MH+: 1558.82939 Da, RT: 50.11 min,  
 Identified with: Mascot (v1.30); IonScore:86, Exp Value:5.5E-008, Ions matched by search engine: 21/148  
 Fragment match tolerance used for search: 0.6 Da

| #1 | b <sup>+</sup> | b <sup>2+</sup> | Seq.     | y <sup>+</sup> | y <sup>2+</sup> | #2 |
|----|----------------|-----------------|----------|----------------|-----------------|----|
| 1  | 88.03931       | 44.52329        | S        |                |                 | 15 |
| 2  | 217.08191      | 109.04459       | E        | 1471.80034     | 736.40381       | 14 |
| 3  | 330.16598      | 165.58663       | L        | 1342.75774     | 671.88251       | 13 |
| 4  | 443.25005      | 222.12866       | I        | 1229.67367     | 615.34047       | 12 |
| 5  | 558.27700      | 279.64214       | D        | 1116.58960     | 558.79844       | 11 |
| 6  | 629.31412      | 315.16070       | A        | 1001.56265     | 501.28496       | 10 |
| 7  | 742.39819      | 371.70273       | I        | 930.52553      | 465.76640       | 9  |
| 8  | 813.43531      | 407.22129       | A        | 817.44146      | 409.22437       | 8  |
| 9  | 942.47791      | 471.74259       | E        | 746.40434      | 373.70581       | 7  |
| 10 | 1112.58344     | 556.79536       | K-Acetyl | 617.36174      | 309.18451       | 6  |
| 11 | 1169.60491     | 585.30609       | G        | 447.25620      | 224.13174       | 5  |
| 12 | 1226.62638     | 613.81683       | G        | 390.23473      | 195.62100       | 4  |
| 13 | 1325.69480     | 663.35104       | V        | 333.21326      | 167.11027       | 3  |
| 14 | 1412.72683     | 706.86705       | S        | 234.14484      | 117.57606       | 2  |
| 15 |                |                 | K        | 147.11281      | 74.06004        | 1  |

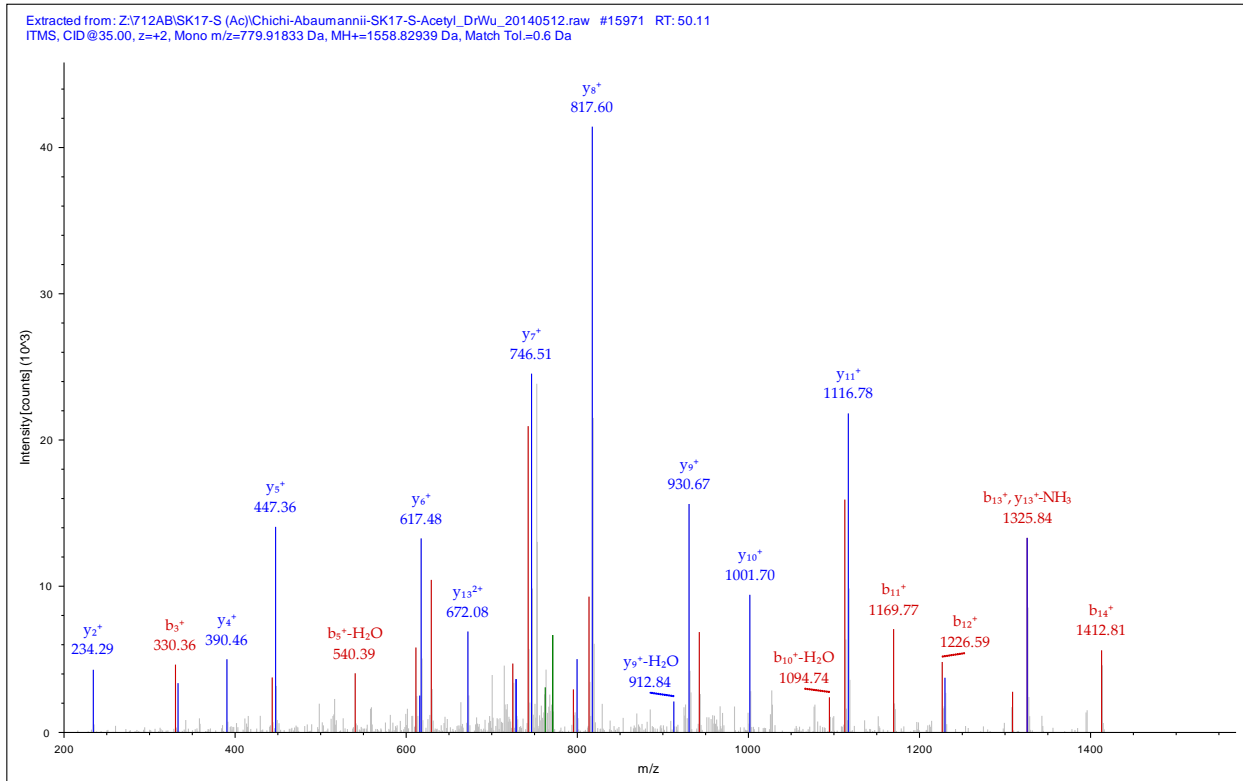

peg.2396 18037

Peptide Summary

Sequence: SELIDAIAEKGGVSK, K10-Acetyl (42.01057 Da)  
 Charge: +2, Monoisotopic m/z: 779.92090 Da (+1.08 mmu/+1.38 ppm), MH+: 1558.83452 Da, RT: 50.48 min,  
 Identified with: Sequest HT (v1.3); XCorr:3.00, Ions matched by search engine: 0/0  
 Fragment match tolerance used for search: 0.6 Da

| #1 | b <sup>+</sup> | b <sup>2+</sup> | Seq.     | y <sup>+</sup> | y <sup>2+</sup> | #2 |
|----|----------------|-----------------|----------|----------------|-----------------|----|
| 1  | 88.03931       | 44.52329        | S        |                |                 | 15 |
| 2  | 217.08191      | 109.04459       | E        | 1471.80034     | 736.40381       | 14 |
| 3  | 330.16598      | 165.58663       | L        | 1342.75774     | 671.88251       | 13 |
| 4  | 443.25005      | 222.12866       | I        | 1229.67367     | 615.34047       | 12 |
| 5  | 558.27700      | 279.64214       | D        | 1116.58960     | 558.79844       | 11 |
| 6  | 629.31412      | 315.16070       | A        | 1001.56265     | 501.28496       | 10 |
| 7  | 742.39819      | 371.70273       | I        | 930.52553      | 465.76640       | 9  |
| 8  | 813.43531      | 407.22129       | A        | 817.44146      | 409.22437       | 8  |
| 9  | 942.47791      | 471.74259       | E        | 746.40434      | 373.70581       | 7  |
| 10 | 1112.58344     | 556.79536       | K-Acetyl | 617.36174      | 309.18451       | 6  |
| 11 | 1169.60491     | 585.30609       | G        | 447.25620      | 224.13174       | 5  |
| 12 | 1226.62638     | 613.81683       | G        | 390.23473      | 195.62100       | 4  |
| 13 | 1325.69480     | 663.35104       | V        | 333.21326      | 167.11027       | 3  |
| 14 | 1412.72683     | 706.86705       | S        | 234.14484      | 117.57606       | 2  |
| 15 |                |                 | K        | 147.11281      | 74.06004        | 1  |

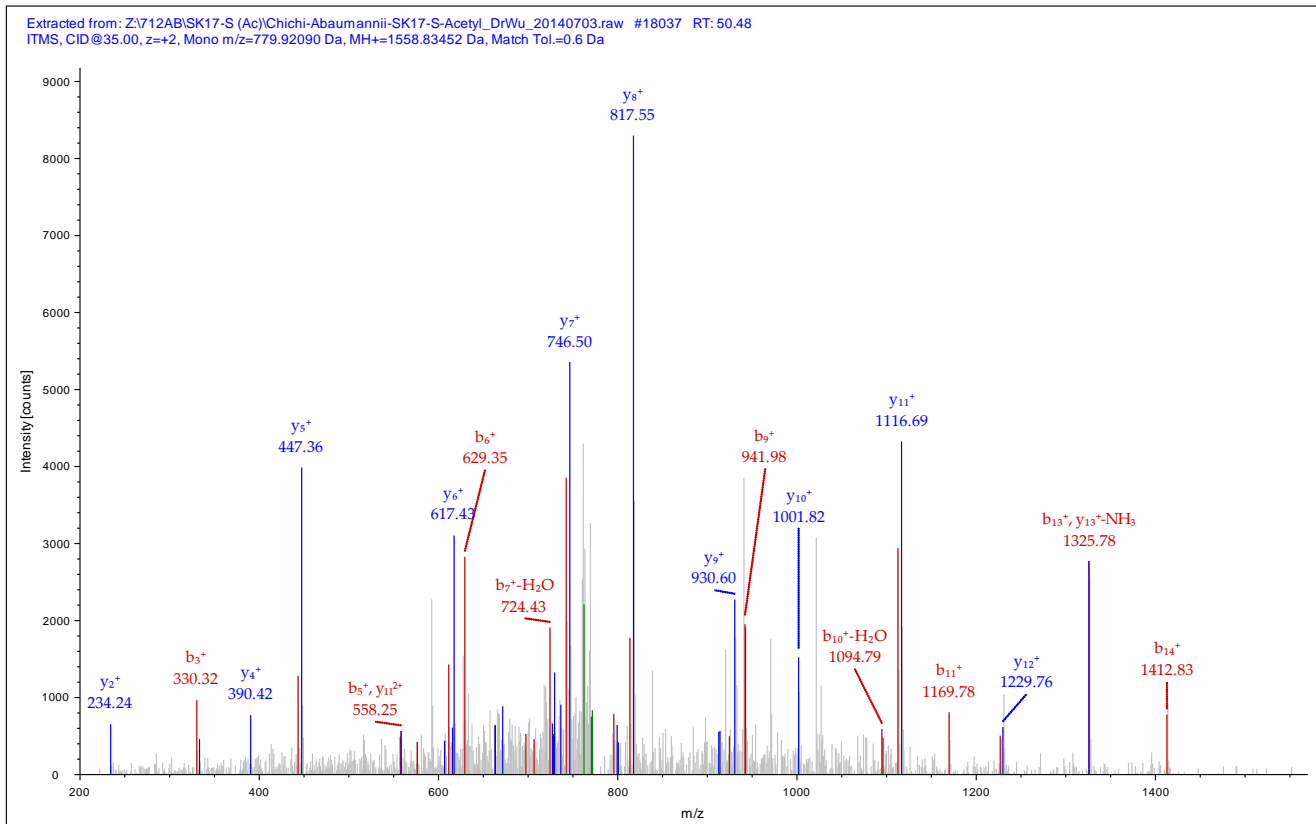



# peg.2410 19636

Extracted from: Z:\712AB\SK17-S (Ac)\Chichi-Abaumannii-SK17-R-Acetyl\_DrWu\_20140512.raw #19636 RT: 55.34  
 ITMS, CID@35.00, z=+3, Mono m/z=1125.91663 Da, MH+=3375.73532 Da, Match Tol:=0.6 Da

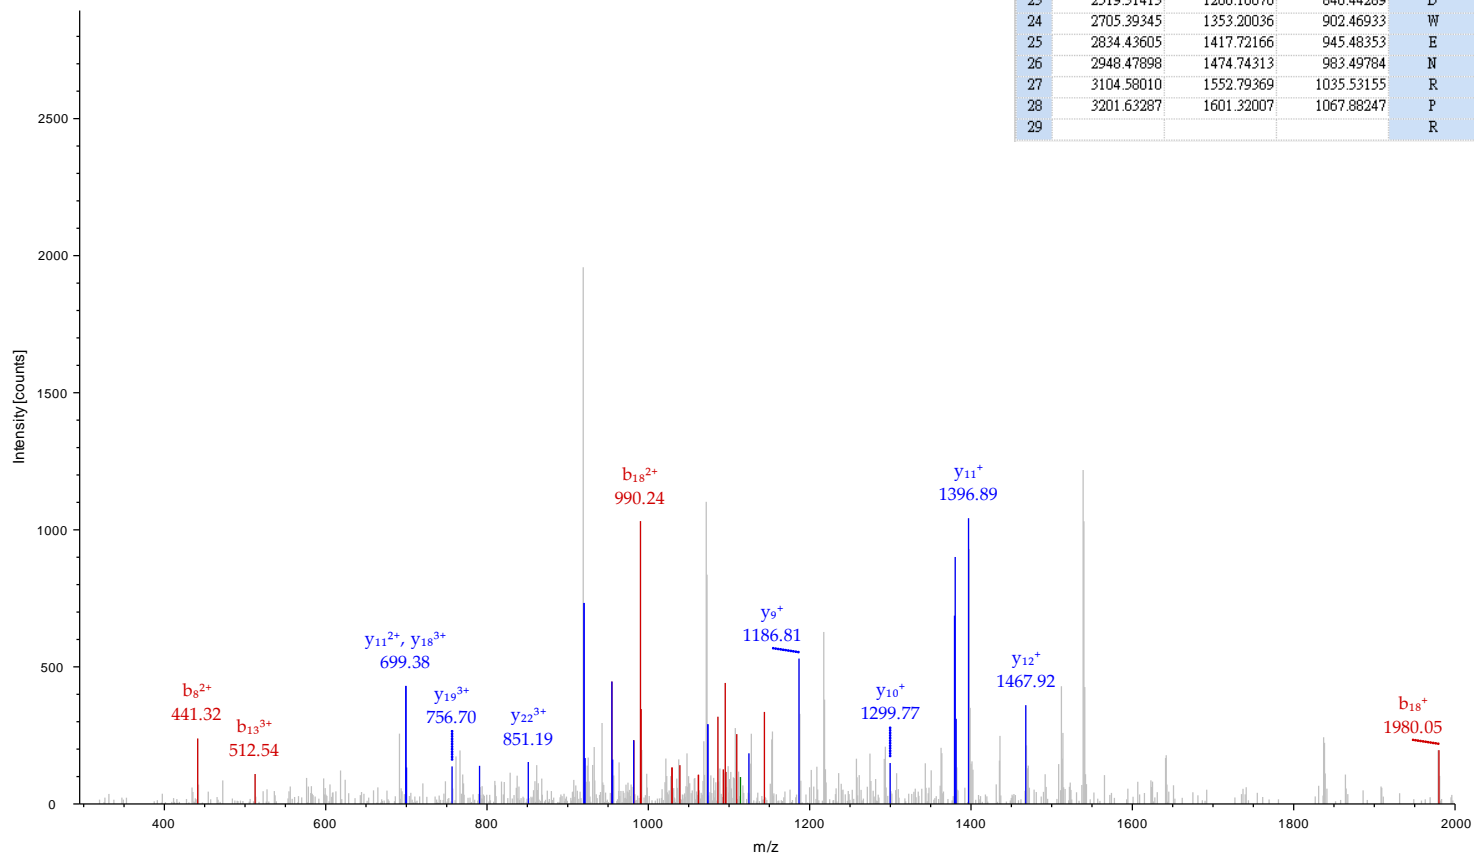

| #1 | b <sup>+</sup> | b <sup>2+</sup> | b <sup>3+</sup> | Seq.     | y <sup>+</sup> | y <sup>2+</sup> | y <sup>3+</sup> | #2 |
|----|----------------|-----------------|-----------------|----------|----------------|-----------------|-----------------|----|
| 1  | 138.06619      | 69.53673        | 46.69358        | H        |                |                 |                 | 29 |
| 2  | 301.12951      | 151.06839       | 101.04802       | Y        | 3238.68565     | 1619.84646      | 1080.23340      | 28 |
| 3  | 414.21358      | 207.61043       | 138.74271       | I        | 3075.62233     | 1538.31480      | 1025.87896      | 27 |
| 4  | 485.25070      | 243.12899       | 162.42175       | A        | 2962.53826     | 1481.77277      | 988.18427       | 26 |
| 5  | 598.33477      | 299.67102       | 200.11644       | L        | 2891.50114     | 1446.25421      | 964.50523       | 25 |
| 6  | 697.40319      | 349.20523       | 233.13925       | V        | 2778.41707     | 1389.71217      | 926.81054       | 24 |
| 7  | 825.46177      | 413.23452       | 275.82544       | Q        | 2679.34865     | 1340.17796      | 893.78773       | 23 |
| 8  | 882.48324      | 441.74526       | 294.83260       | Q        | 2551.29007     | 1276.14867      | 851.10154       | 22 |
| 9  | 1010.54182     | 505.77455       | 337.51879       | G        | 2494.26860     | 1247.63794      | 832.09438       | 21 |
| 10 | 1109.61024     | 555.30876       | 370.54160       | Y        | 2366.21002     | 1183.60865      | 789.40819       | 20 |
| 11 | 1279.71577     | 640.36152       | 427.24344       | K-Acetyl | 2267.14160     | 1134.07444      | 756.38538       | 19 |
| 12 | 1407.77435     | 704.39081       | 469.92963       | Q        | 2097.03606     | 1049.02167      | 699.68354       | 18 |
| 13 | 1536.81695     | 768.91211       | 512.94383       | E        | 1968.97748     | 984.99238       | 656.99734       | 17 |
| 14 | 1593.83842     | 797.42285       | 531.95099       | G        | 1839.93488     | 920.47108       | 613.98314       | 16 |
| 15 | 1680.87045     | 840.93886       | 560.96167       | S        | 1782.91341     | 891.96034       | 594.97599       | 15 |
| 16 | 1779.93887     | 890.47307       | 593.98447       | V        | 1695.88138     | 848.44433       | 565.96531       | 14 |
| 17 | 1908.98147     | 954.99437       | 636.99867       | E        | 1596.81296     | 798.91012       | 532.94250       | 13 |
| 18 | 1980.01859     | 990.51293       | 660.67771       | A        | 1467.77036     | 734.38882       | 489.92830       | 12 |
| 19 | 2077.07136     | 1039.03932      | 693.02864       | P        | 1396.73324     | 698.87026       | 466.24926       | 11 |
| 20 | 2190.15543     | 1095.58135      | 730.72333       | L        | 1299.68047     | 650.34387       | 433.89834       | 10 |
| 21 | 2303.23950     | 1152.12339      | 768.41802       | I        | 1186.59640     | 593.80184       | 396.20365       | 9  |
| 22 | 2404.28718     | 1202.64723      | 802.10058       | T        | 1073.51233     | 537.25980       | 358.50896       | 8  |
| 23 | 2519.31413     | 1260.16070      | 840.44289       | D        | 972.46465      | 486.73596       | 324.82640       | 7  |
| 24 | 2705.39345     | 1353.20036      | 902.46933       | W        | 857.43770      | 429.22249       | 286.48408       | 6  |
| 25 | 2834.43605     | 1417.72166      | 945.48353       | E        | 671.35838      | 336.18283       | 224.45764       | 5  |
| 26 | 2948.47898     | 1474.74313      | 983.49784       | N        | 542.31578      | 271.66153       | 181.44344       | 4  |
| 27 | 3104.58010     | 1552.79369      | 1035.53155      | R        | 428.27285      | 214.64006       | 143.42913       | 3  |
| 28 | 3201.63287     | 1601.32007      | 1067.88247      | P        | 272.17173      | 136.58950       | 91.39543        | 2  |
| 29 |                |                 |                 | R        | 175.11896      | 88.06312        | 59.04450        | 1  |

# peg.2423 25397

Extracted from: Z:\712AB\SK17-S (Ac)\Chichi-Abaumannii-SK17-R-Acetyl\_DrWu\_20140512.raw #25397 RT: 73.62  
 ITMS, CID@35.00, z=+3, Mono m/z=1298.01062 Da, MH+=3892.01731 Da, Match Tol.=0.6 Da

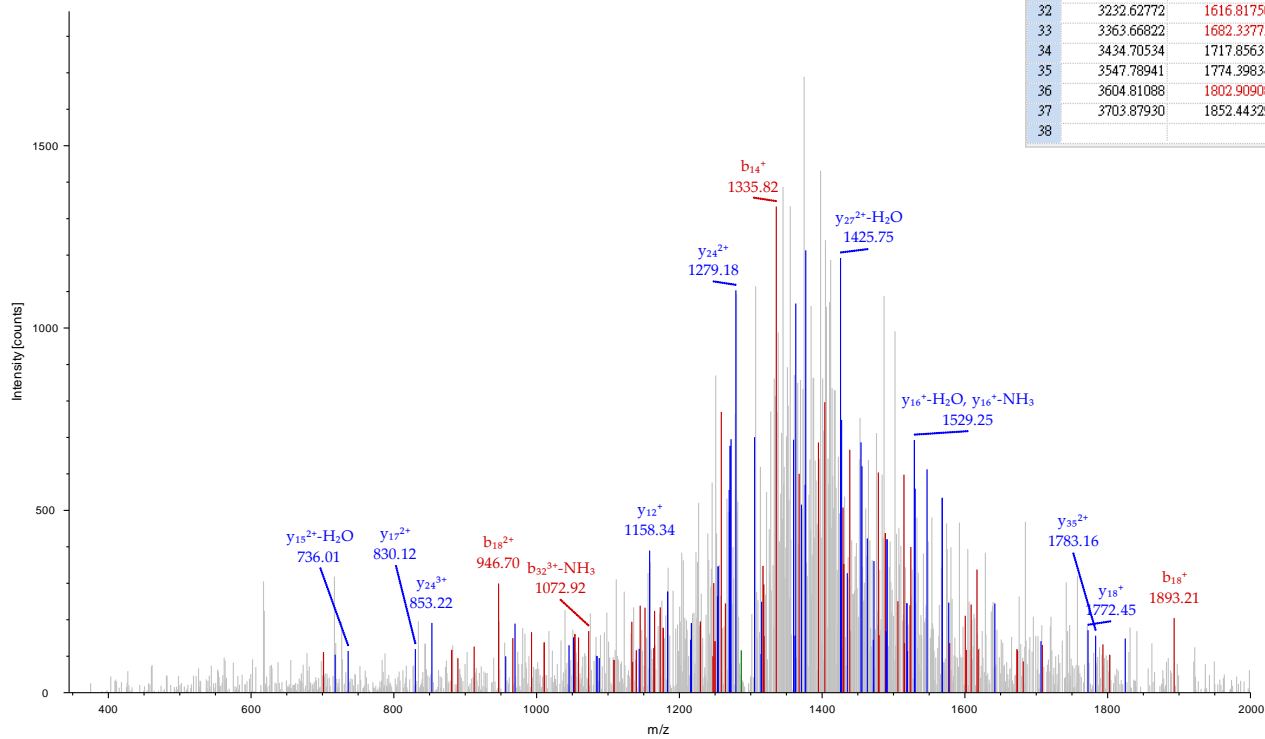

| #1 | b <sup>+</sup> | b <sup>2+</sup> | b <sup>3+</sup> | Seq.        | y <sup>+</sup> | y <sup>2+</sup> | y <sup>3+</sup> | #2 |
|----|----------------|-----------------|-----------------|-------------|----------------|-----------------|-----------------|----|
| 1  | 115.05021      | 58.02874        | 39.02159        | N           |                |                 |                 | 38 |
| 2  | 228.13428      | 114.57078       | 76.71628        | I           | 3777.95247     | 1889.47987      | 1259.98901      | 37 |
| 3  | 327.20270      | 164.10499       | 109.73908       | V           | 3664.86840     | 1832.93784      | 1222.29432      | 36 |
| 4  | 464.26161      | 232.63444       | 155.42539       | H           | 3565.79998     | 1783.40363      | 1189.27151      | 35 |
| 5  | 567.27080      | 284.13904       | 189.76178       | C           | 3428.74107     | 1714.87417      | 1143.58521      | 34 |
| 6  | 624.29227      | 312.64977       | 208.76894       | G           | 3325.73188     | 1663.36958      | 1109.24881      | 33 |
| 7  | 739.31922      | 370.16325       | 247.11126       | D           | 3268.71041     | 1634.85884      | 1090.24165      | 32 |
| 8  | 838.38764      | 419.69746       | 280.13406       | V           | 3153.68346     | 1577.34537      | 1051.89934      | 31 |
| 9  | 895.40911      | 448.20819       | 299.14122       | G           | 3054.61504     | 1527.81116      | 1018.87653      | 30 |
| 10 | 966.44623      | 483.72675       | 322.82026       | A           | 2997.59357     | 1499.30042      | 999.86937       | 29 |
| 11 | 1023.46770     | 512.23749       | 341.82742       | G           | 2926.55645     | 1463.78186      | 976.19033       | 28 |
| 12 | 1151.52628     | 576.26678       | 384.51361       | Q           | 2869.53498     | 1435.27113      | 957.18318       | 27 |
| 13 | 1264.61035     | 632.80881       | 422.20830       | I           | 2741.47640     | 1371.24184      | 914.49698       | 26 |
| 14 | 1335.64747     | 668.32737       | 445.88734       | A           | 2628.39233     | 1314.69980      | 876.80229       | 25 |
| 15 | 1505.75300     | 753.38014       | 502.58918       | K-Acetyl    | 2557.35521     | 1279.18124      | 853.12325       | 24 |
| 16 | 1618.83707     | 809.92217       | 540.28387       | I           | 2387.24967     | 1194.12847      | 796.42141       | 23 |
| 17 | 1778.86773     | 889.93750       | 593.62743       | C-Carbam... | 2274.16560     | 1137.58644      | 758.72672       | 22 |
| 18 | 1892.91066     | 946.95897       | 631.64174       | N           | 2114.13495     | 1057.57111      | 705.38317       | 21 |
| 19 | 2006.95359     | 1003.98043      | 669.65605       | N           | 2000.09202     | 1000.54965      | 667.36886       | 20 |
| 20 | 2120.03766     | 1060.52247      | 707.35074       | L           | 1886.04909     | 943.52818       | 629.35455       | 19 |
| 21 | 2233.12173     | 1117.06450      | 745.04543       | I           | 1772.96502     | 886.98615       | 591.65986       | 18 |
| 22 | 2346.20580     | 1173.60654      | 782.74012       | L           | 1659.88095     | 830.44411       | 553.96517       | 17 |
| 23 | 2403.22727     | 1202.11727      | 801.74727       | G           | 1546.79688     | 773.90208       | 516.27048       | 16 |
| 24 | 2516.31134     | 1258.65931      | 839.44196       | I           | 1489.77541     | 745.39134       | 497.26332       | 15 |
| 25 | 2603.34337     | 1302.17532      | 868.45264       | S           | 1376.69134     | 688.84931       | 459.56863       | 14 |
| 26 | 2734.38387     | 1367.69557      | 912.13281       | M           | 1289.65931     | 645.33329       | 430.55795       | 13 |
| 27 | 2805.42099     | 1403.21413      | 935.81185       | A           | 1158.61881     | 579.81304       | 386.87779       | 12 |
| 28 | 2876.45811     | 1438.73269      | 959.49089       | A           | 1087.58169     | 544.29448       | 363.19875       | 11 |
| 29 | 2975.52653     | 1488.26690      | 992.51369       | V           | 1016.54457     | 508.77592       | 339.51971       | 10 |
| 30 | 3046.56365     | 1523.78546      | 1016.19273      | A           | 917.47615      | 459.24171       | 306.49690       | 9  |
| 31 | 3175.60625     | 1588.30676      | 1059.20693      | E           | 846.43903      | 423.72315       | 282.81786       | 8  |
| 32 | 3232.62772     | 1616.81750      | 1078.21409      | G           | 717.39643      | 359.20185       | 239.80366       | 7  |
| 33 | 3363.66822     | 1682.33775      | 1121.89426      | M           | 660.37496      | 330.69112       | 220.79650       | 6  |
| 34 | 3434.70534     | 1717.85631      | 1145.57330      | A           | 529.33446      | 265.17087       | 177.11634       | 5  |
| 35 | 3547.78941     | 1774.39834      | 1183.26799      | L           | 458.29734      | 229.65231       | 153.43730       | 4  |
| 36 | 3604.81088     | 1802.90908      | 1202.27514      | G           | 345.21327      | 173.11027       | 115.74261       | 3  |
| 37 | 3703.87930     | 1852.44329      | 1235.29795      | V           | 288.19180      | 144.59954       | 96.73545        | 2  |
| 38 |                |                 |                 | K-Acetyl    | 189.12338      | 95.06533        | 63.71264        | 1  |

peg.2484 27598

| #1 | b <sup>+</sup> | b <sup>2+</sup> | b <sup>3+</sup> | Seq.        | y <sup>+</sup> | y <sup>2+</sup> | y <sup>3+</sup> | #2 |
|----|----------------|-----------------|-----------------|-------------|----------------|-----------------|-----------------|----|
| 1  | 156.10191      | 78.55459        | 52.70549        | I-Acetyl    |                |                 |                 | 23 |
| 2  | 316.13257      | 158.56992       | 106.04904       | C-Carbam... | 2466.23684     | 1233.62206      | 822.75046       | 22 |
| 3  | 387.16969      | 194.08848       | 129.72808       | A           | 2306.20618     | 1153.60673      | 769.40691       | 21 |
| 4  | 486.23811      | 243.62269       | 162.75089       | V           | 2235.16906     | 1118.08817      | 745.72787       | 20 |
| 5  | 543.25958      | 272.13343       | 181.75804       | G           | 2136.10064     | 1068.55396      | 712.70506       | 19 |
| 6  | 671.31816      | 336.16272       | 224.44424       | Q           | 2079.07917     | 1040.04322      | 693.69791       | 18 |
| 7  | 742.35528      | 371.68128       | 248.12328       | A           | 1951.02059     | 976.01393       | 651.01171       | 17 |
| 8  | 889.42370      | 445.21549       | 297.14608       | F           | 1879.98347     | 940.49537       | 627.33267       | 16 |
| 9  | 976.45573      | 488.73150       | 326.15676       | S           | 1732.91505     | 866.96116       | 578.30987       | 15 |
| 10 | 1089.53980     | 545.27354       | 363.85145       | L           | 1645.88302     | 823.44515       | 549.29919       | 14 |
| 11 | 1204.56675     | 602.78701       | 402.19377       | D           | 1532.79895     | 766.90311       | 511.60450       | 13 |
| 12 | 1303.63517     | 652.32122       | 435.21657       | V           | 1417.77200     | 709.38964       | 473.26218       | 12 |
| 13 | 1450.67058     | 725.83893       | 484.22838       | M-Oxidation | 1318.70358     | 659.85543       | 440.23938       | 11 |
| 14 | 1551.71826     | 776.36277       | 517.91094       | T           | 1171.66817     | 586.33772       | 391.22757       | 10 |
| 15 | 1721.82380     | 861.41554       | 574.61278       | K-Acetyl    | 1070.62049     | 535.81388       | 357.54501       | 9  |
| 16 | 1834.90787     | 917.95757       | 612.30747       | L           | 900.51495      | 450.76111       | 300.84317       | 8  |
| 17 | 1947.99194     | 974.49961       | 650.00216       | L           | 787.43088      | 394.21908       | 263.14848       | 7  |
| 18 | 2062.03487     | 1031.52107      | 688.01647       | N           | 674.34681      | 337.67704       | 225.45379       | 6  |
| 19 | 2175.11894     | 1088.06311      | 725.71116       | I           | 560.30388      | 280.65558       | 187.43948       | 5  |
| 20 | 2289.16187     | 1145.08457      | 763.72547       | N           | 447.21981      | 224.11354       | 149.74479       | 4  |
| 21 | 2360.19899     | 1180.60313      | 787.40451       | A           | 333.17688      | 167.09208       | 111.73048       | 3  |
| 22 | 2475.22594     | 1238.11661      | 825.74683       | D           | 262.13976      | 131.57352       | 88.05144        | 2  |
| 23 |                |                 |                 | K           | 147.11281      | 74.06004        | 49.70912        | 1  |

Extracted from: Z:\712AB\SK17-S (Ac)\Chichi-Abaumanni-SK17-S-Acetyl\_DrWu\_20140512.raw #27598 RT: 83.63  
 ITMS, CID@35.00, z=+3, Mono m/z=874.44366 Da, MH+=2621.31644 Da, Match Tol.=0.6 Da

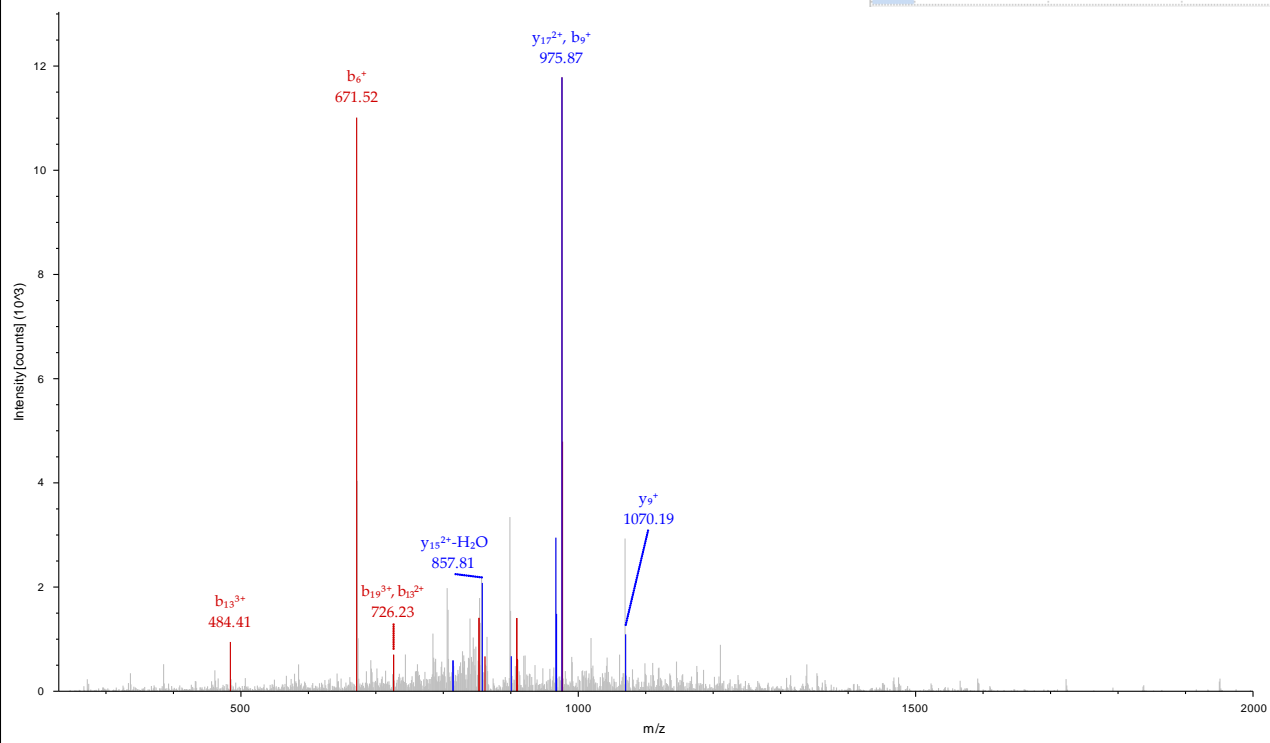

peg.25 28615

| #1 | b <sup>+</sup> | b <sup>2+</sup> | b <sup>3+</sup> | Seq.        | y <sup>+</sup> | y <sup>2+</sup> | y <sup>3+</sup> | #2 |
|----|----------------|-----------------|-----------------|-------------|----------------|-----------------|-----------------|----|
| 1  | 156.10191      | 78.55459        | 52.70549        | L-Acetyl    |                |                 |                 | 30 |
| 2  | 319.16523      | 160.08625       | 107.05993       | Y           | 3330.61751     | 1665.81239      | 1110.87735      | 29 |
| 3  | 456.22414      | 228.61571       | 152.74623       | H           | 3167.55419     | 1584.28073      | 1056.52291      | 28 |
| 4  | 585.26674      | 293.13701       | 195.76043       | E           | 3030.49528     | 1515.75128      | 1010.83661      | 27 |
| 5  | 698.35081      | 349.67904       | 233.45512       | L           | 2901.45268     | 1451.22998      | 967.82241       | 26 |
| 6  | 811.43488      | 406.22108       | 271.14981       | L           | 2788.36861     | 1394.68794      | 930.12772       | 25 |
| 7  | 958.47030      | 479.73879       | 320.16162       | M-Oxidation | 2675.28454     | 1338.14591      | 892.43303       | 24 |
| 8  | 1073.49725     | 537.25226       | 358.50393       | D           | 2528.24913     | 1264.62820      | 843.42123       | 23 |
| 9  | 1144.53437     | 572.77082       | 382.18297       | A           | 2413.22218     | 1207.11473      | 805.07891       | 22 |
| 10 | 1247.54356     | 624.27542       | 416.51937       | C           | 2342.18506     | 1171.59617      | 781.39987       | 21 |
| 11 | 1318.58068     | 659.79398       | 440.19841       | A           | 2239.17587     | 1120.09157      | 747.06347       | 20 |
| 12 | 1389.61780     | 695.31254       | 463.87745       | A           | 2168.13875     | 1084.57301      | 723.38443       | 19 |
| 13 | 1526.67671     | 763.84199       | 509.56375       | H           | 2097.10163     | 1049.05445      | 699.70539       | 18 |
| 14 | 1639.76078     | 820.38403       | 547.25844       | L           | 1960.04272     | 980.52500       | 654.01909       | 17 |
| 15 | 1752.84485     | 876.92606       | 584.95313       | I           | 1846.95865     | 923.98296       | 616.32440       | 16 |
| 16 | 1881.88745     | 941.44736       | 627.96733       | E           | 1733.87458     | 867.44093       | 578.62971       | 15 |
| 17 | 1996.91440     | 998.96084       | 666.30965       | D           | 1604.83198     | 802.91963       | 535.61551       | 14 |
| 18 | 2182.99372     | 1092.00050      | 728.33609       | W           | 1489.80503     | 745.40615       | 497.27319       | 13 |
| 19 | 2353.09925     | 1177.05326      | 785.03793       | K-Acetyl    | 1303.72571     | 652.36649       | 435.24675       | 12 |
| 20 | 2410.12072     | 1205.56400      | 804.04509       | G           | 1133.62017     | 567.31372       | 378.54491       | 11 |
| 21 | 2509.18914     | 1255.09821      | 837.06790       | V           | 1076.59870     | 538.80299       | 359.53775       | 10 |
| 22 | 2608.25756     | 1304.63242      | 870.09070       | V           | 977.53028      | 489.26878       | 326.51494       | 9  |
| 23 | 2755.32598     | 1378.16663      | 919.11351       | F           | 878.46186      | 439.73457       | 293.49214       | 8  |
| 24 | 2826.36310     | 1413.68519      | 942.79255       | A           | 731.39344      | 366.20036       | 244.46933       | 7  |
| 25 | 2955.40570     | 1478.20649      | 985.80675       | E           | 660.35632      | 330.68180       | 220.79029       | 6  |
| 26 | 3068.48977     | 1534.74852      | 1023.50144      | I           | 531.31372      | 266.16050       | 177.77609       | 5  |
| 27 | 3167.55819     | 1584.28273      | 1056.52425      | V           | 418.22965      | 209.61846       | 140.08140       | 4  |
| 28 | 3282.58514     | 1641.79621      | 1094.86656      | D           | 319.16123      | 160.08425       | 107.05859       | 3  |
| 29 | 3339.60661     | 1670.30694      | 1113.87372      | G           | 204.13428      | 102.57078       | 68.71628        | 2  |
| 30 |                |                 |                 | K           | 147.11281      | 74.06004        | 49.70912        | 1  |

Extracted from: Z:\712AB\SK17-S (Ac)\Chichi-Abaumannii-SK17-R-Acetyl\_DrWu\_20140703.raw #28615 RT: 78.63  
 ITMS, CID@35.00, z=+3, Mono m/z=1162.58264 Da, MH+=3485.73337 Da, Match Tol.=0.6 Da

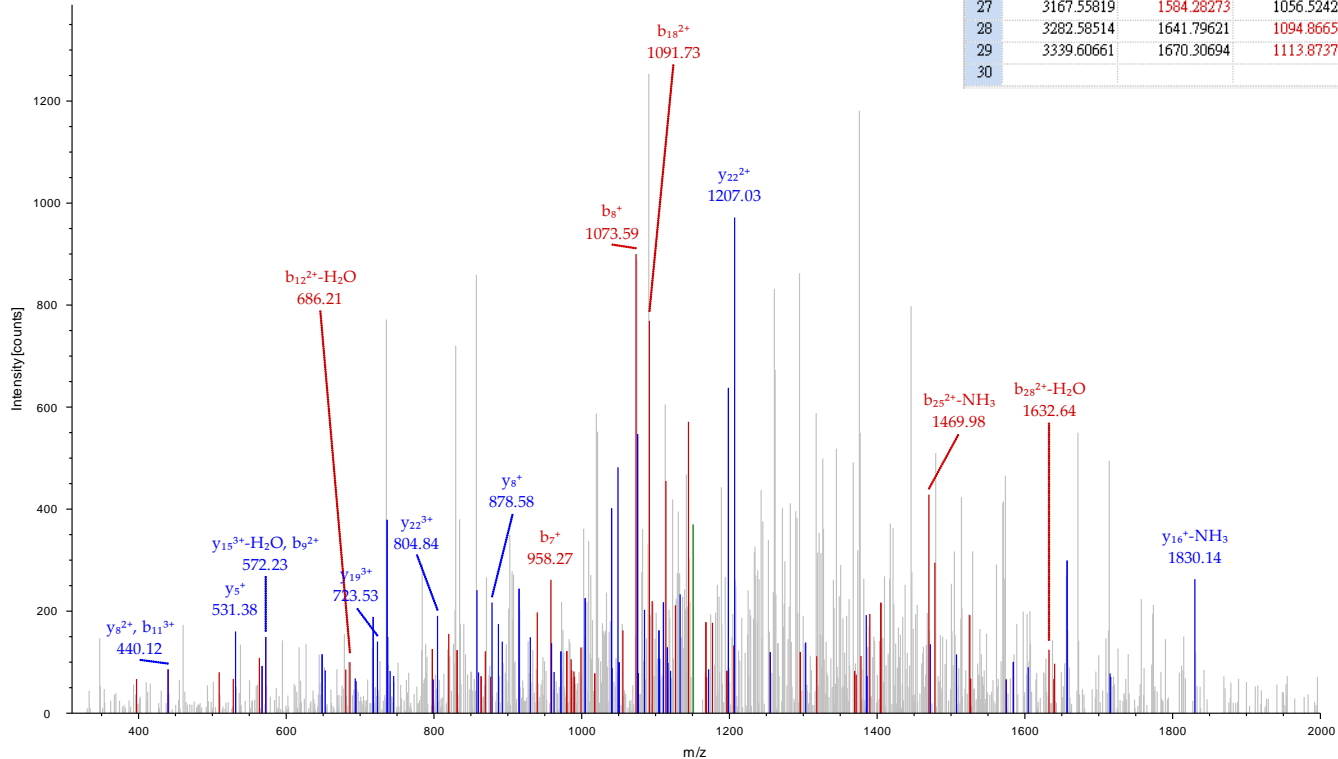

peg.252 18050

| #1 | b <sup>+</sup> | b <sup>2+</sup> | b <sup>3+</sup> | Seq.     | y <sup>+</sup> | y <sup>2+</sup> | y <sup>3+</sup> | #2 |
|----|----------------|-----------------|-----------------|----------|----------------|-----------------|-----------------|----|
| 1  | 114.05496      | 57.53112        | 38.68984        | A-Acetyl |                |                 |                 | 14 |
| 2  | 213.12338      | 107.06533       | 71.71264        | V        | 1556.88297     | 778.94512       | 519.63251       | 13 |
| 3  | 369.22450      | 185.11589       | 123.74635       | R        | 1457.81455     | 729.41091       | 486.60970       | 12 |
| 4  | 484.25145      | 242.62936       | 162.08867       | D        | 1301.71343     | 651.36035       | 434.57599       | 11 |
| 5  | 615.29195      | 308.14961       | 205.76883       | M        | 1186.68648     | 593.84688       | 396.23368       | 10 |
| 6  | 686.32907      | 343.66817       | 229.44787       | A        | 1055.64598     | 528.32663       | 352.55351       | 9  |
| 7  | 799.41314      | 400.21021       | 267.14256       | L        | 984.60886      | 492.80807       | 328.87447       | 8  |
| 8  | 870.45026      | 435.72877       | 290.82160       | A        | 871.52479      | 436.26603       | 291.17978       | 7  |
| 9  | 999.49286      | 500.25007       | 333.83580       | E        | 800.48767      | 400.74747       | 267.50074       | 6  |
| 10 | 1169.59840     | 585.30284       | 390.53765       | K-Acetyl | 671.44507      | 336.22617       | 224.48654       | 5  |
| 11 | 1282.68247     | 641.84487       | 428.23234       | L        | 501.33953      | 251.17340       | 167.78469       | 4  |
| 12 | 1395.76654     | 698.38691       | 465.92703       | I        | 388.25546      | 194.63137       | 130.09000       | 3  |
| 13 | 1523.82512     | 762.41620       | 508.61322       | Q        | 275.17139      | 138.08933       | 92.39531        | 2  |
| 14 |                |                 |                 | K        | 147.11281      | 74.06004        | 49.70912        | 1  |

Extracted from: Z:\712AB\SK17-S (Ac)\Chichi-Abaumannii-SK17-R-Acetyl\_DrWu\_20140512.raw #18050 RT: 50.93  
 ITMS, CID@35.00, z=+3, Mono m/z=557.31323 Da, MH+=1669.92514 Da, Match Tol.=0.6 Da

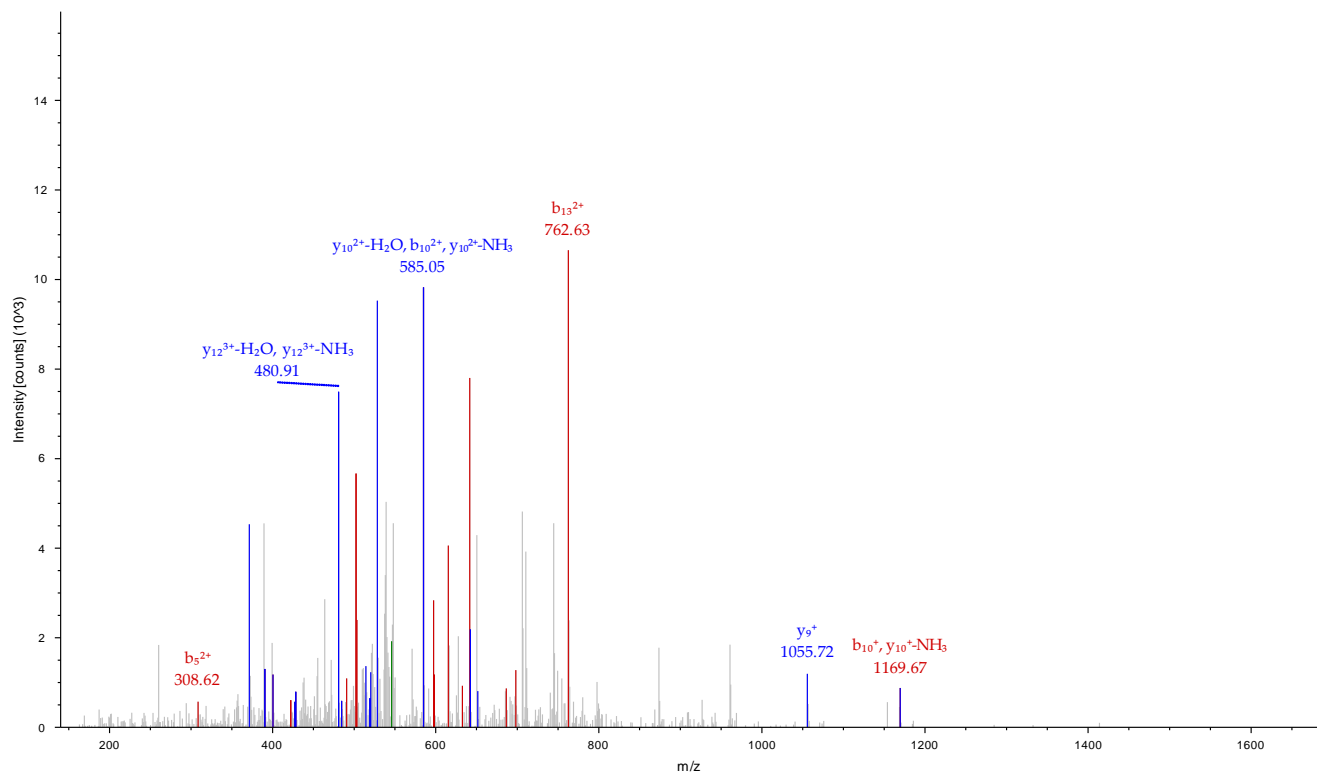

peg.252 16111

| #1 | b <sup>+</sup> | b <sup>2+</sup> | b <sup>3+</sup> | Seq.     | y <sup>+</sup> | y <sup>2+</sup> | y <sup>3+</sup> | #2 |
|----|----------------|-----------------|-----------------|----------|----------------|-----------------|-----------------|----|
| 1  | 114.05496      | 57.53112        | 38.68984        | A-Acetyl |                |                 |                 | 14 |
| 2  | 213.12338      | 107.06533       | 71.71264        | V        | 1556.88297     | 778.94512       | 519.63251       | 13 |
| 3  | 369.22450      | 185.11589       | 123.74635       | R        | 1457.81455     | 729.41091       | 486.60970       | 12 |
| 4  | 484.25145      | 242.62936       | 162.08867       | D        | 1301.71343     | 651.36035       | 434.57599       | 11 |
| 5  | 615.29195      | 308.14961       | 205.76883       | M        | 1186.68648     | 593.84688       | 396.23368       | 10 |
| 6  | 686.32907      | 343.66817       | 229.44787       | A        | 1055.64598     | 528.32663       | 352.55351       | 9  |
| 7  | 799.41314      | 400.21021       | 267.14256       | L        | 984.60886      | 492.80807       | 328.87447       | 8  |
| 8  | 870.45026      | 435.72877       | 290.82160       | A        | 871.52479      | 436.26603       | 291.17978       | 7  |
| 9  | 999.49286      | 500.25007       | 333.83580       | E        | 800.48767      | 400.74747       | 267.50074       | 6  |
| 10 | 1169.59840     | 585.30284       | 390.53765       | K-Acetyl | 671.44507      | 336.22617       | 224.48654       | 5  |
| 11 | 1282.68247     | 641.84487       | 428.23234       | L        | 501.33953      | 251.17340       | 167.78469       | 4  |
| 12 | 1395.76654     | 698.38691       | 465.92703       | I        | 388.25546      | 194.63137       | 130.09000       | 3  |
| 13 | 1523.82512     | 762.41620       | 508.61322       | Q        | 275.17139      | 138.08933       | 92.39531        | 2  |
| 14 |                |                 |                 | K        | 147.11281      | 74.06004        | 49.70912        | 1  |

Extracted from: Z:\712AB\SK17-S (Ac)\Chichi-Abaumannii-SK17-S-Acetyl\_DrWu\_20140512.raw #16111 RT: 50.46  
 ITMS, CID@35.00, z=+3, Mono m/z=557.31342 Da, MH+=1669.92569 Da, Match Tol.=0.6 Da

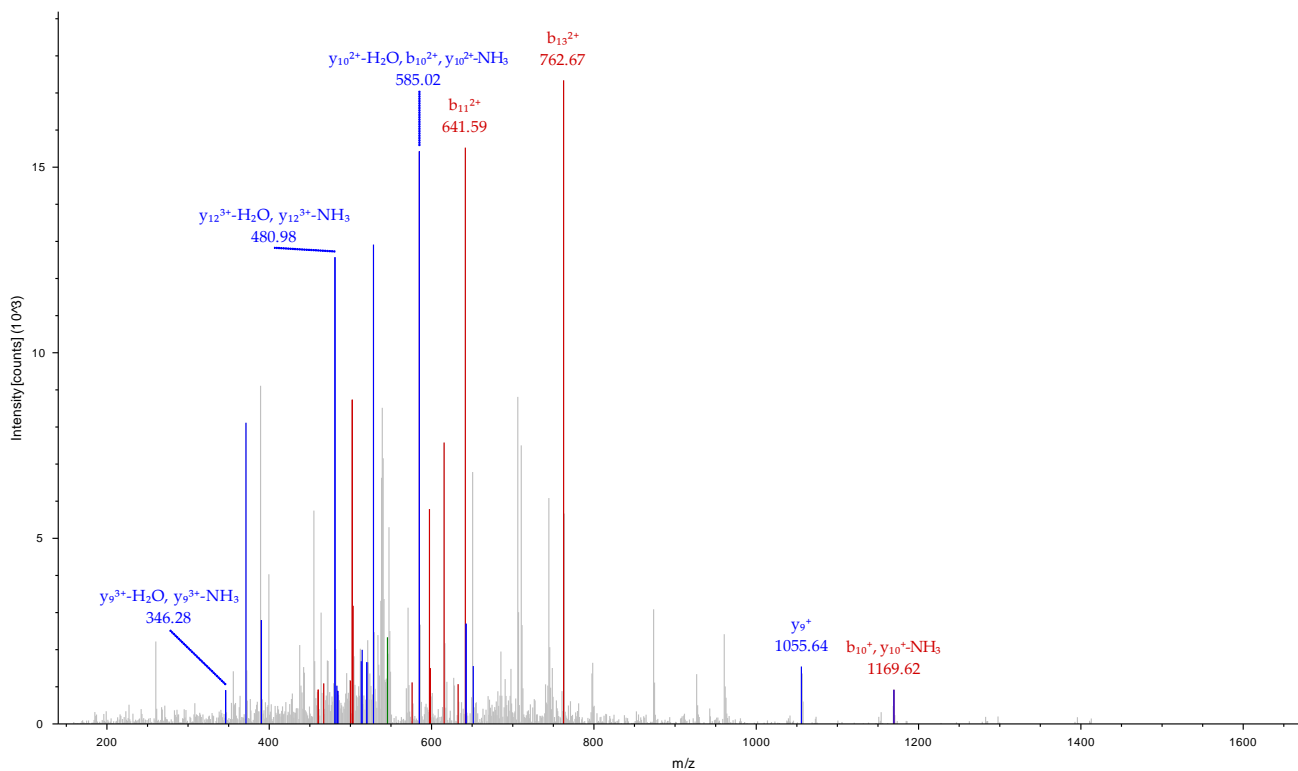

peg.2546 7127

| #1 | b <sup>+</sup> | b <sup>2+</sup> | Seq.     | y <sup>+</sup> | y <sup>2+</sup> | #2 |
|----|----------------|-----------------|----------|----------------|-----------------|----|
| 1  | 174.05834      | 87.53281        | M-Acetyl |                |                 | 11 |
| 2  | 245.09546      | 123.05137       | A        | 1171.66817     | 586.33772       | 10 |
| 3  | 373.15404      | 187.08066       | Q        | 1100.63105     | 550.81916       | 9  |
| 4  | 444.19116      | 222.59922       | A        | 972.57247      | 486.78987       | 8  |
| 5  | 614.29670      | 307.65199       | K-Acetyl | 901.53535      | 451.27131       | 7  |
| 6  | 784.40223      | 392.70475       | K-Acetyl | 731.42982      | 366.21855       | 6  |
| 7  | 871.43426      | 436.22077       | S        | 561.32428      | 281.16578       | 5  |
| 8  | 970.50268      | 485.75498       | V        | 474.29225      | 237.64976       | 4  |
| 9  | 1085.52963     | 543.26845       | D        | 375.22383      | 188.11555       | 3  |
| 10 | 1198.61370     | 599.81049       | I        | 260.19688      | 130.60208       | 2  |
| 11 |                |                 | K        | 147.11281      | 74.06004        | 1  |

Extracted from: Z:\712AB\SK17-S (Ac)\Chichi-Abaumannii-SK17-R-Acetyl\_DrWu\_20140703.raw #7127 RT: 25.44  
 ITMS, CID@35.00, z=+2, Mono m/z=672.86090 Da, MH+=1344.71453 Da, Match Tol.=0.6 Da

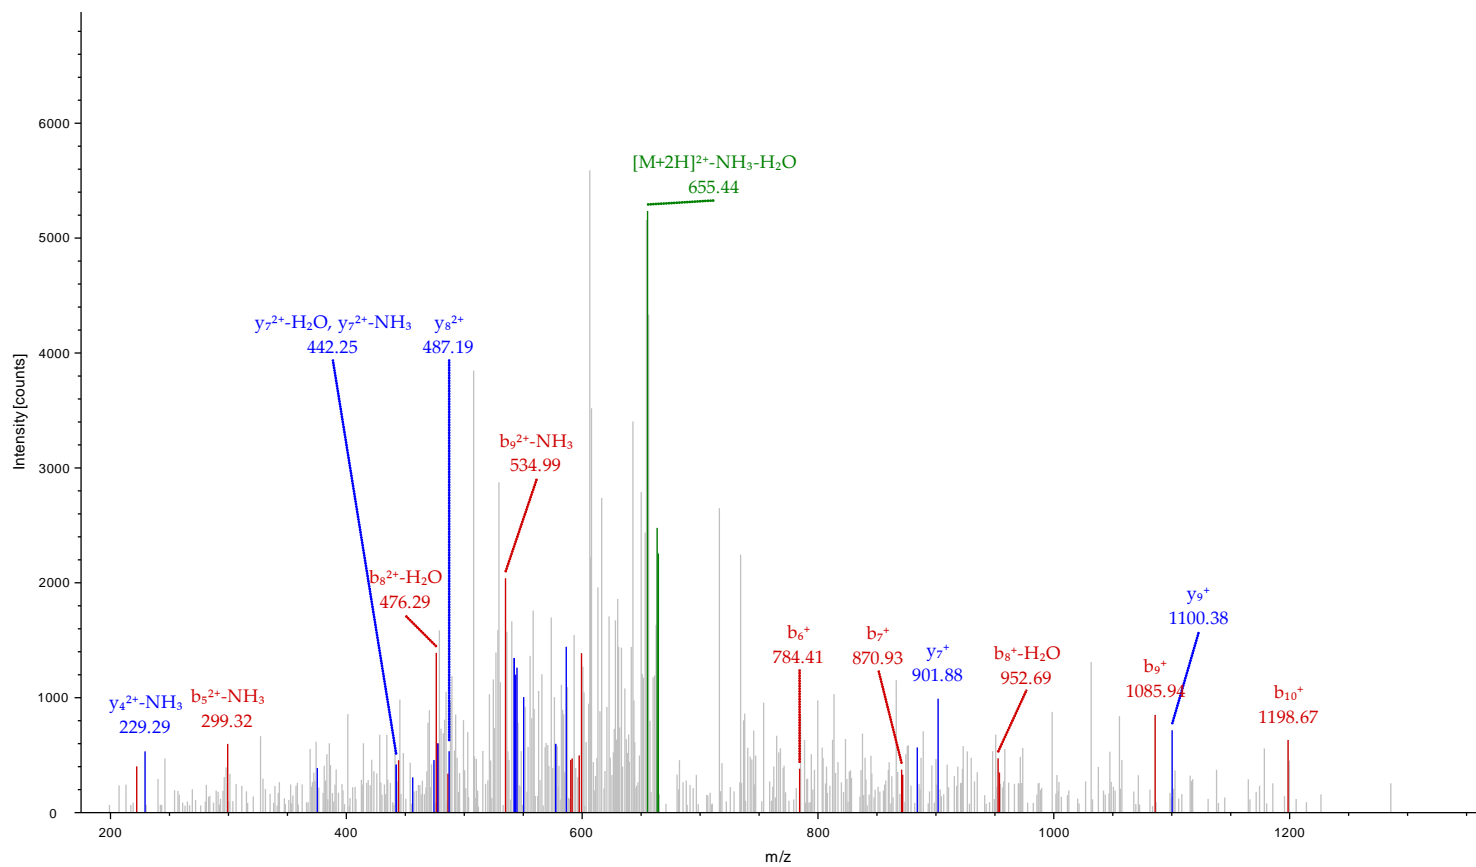

peg.2561 13080

| #1 | b <sup>+</sup> | b <sup>2+</sup> | Seq.     | y <sup>+</sup> | y <sup>2+</sup> | #2 |
|----|----------------|-----------------|----------|----------------|-----------------|----|
| 1  | 138.06619      | 69.53673        | H        |                |                 | 13 |
| 2  | 235.11896      | 118.06312       | P        | 1442.73087     | 721.86907       | 12 |
| 3  | 349.16189      | 175.08458       | N        | 1345.67810     | 673.34269       | 11 |
| 4  | 462.24596      | 231.62662       | I        | 1231.63517     | 616.32122       | 10 |
| 5  | 577.27291      | 289.14009       | D        | 1118.55110     | 559.77919       | 9  |
| 6  | 648.31003      | 324.65865       | A        | 1003.52415     | 502.26571       | 8  |
| 7  | 776.36861      | 388.68794       | Q        | 932.48703      | 466.74715       | 7  |
| 8  | 875.43703      | 438.22215       | V        | 804.42845      | 402.71786       | 6  |
| 9  | 1045.54256     | 523.27492       | K-Acetyl | 705.36003      | 353.18365       | 5  |
| 10 | 1174.58516     | 587.79622       | E        | 535.25449      | 268.13088       | 4  |
| 11 | 1302.64374     | 651.82551       | Q        | 406.21189      | 203.60958       | 3  |
| 12 | 1433.68424     | 717.34576       | M        | 278.15331      | 139.58029       | 2  |
| 13 |                |                 | K        | 147.11281      | 74.06004        | 1  |

Extracted from: Z:\712AB\SK17-S (Ac)\Chichi-Abaumannii-SK17-R-Acetyl\_DrWu\_20140512.raw #13080 RT: 38.48  
 ITMS, CID@35.00, z=+2, Mono m/z=790.39258 Da, MH+=1579.77788 Da, Match Tol.=0.6 Da

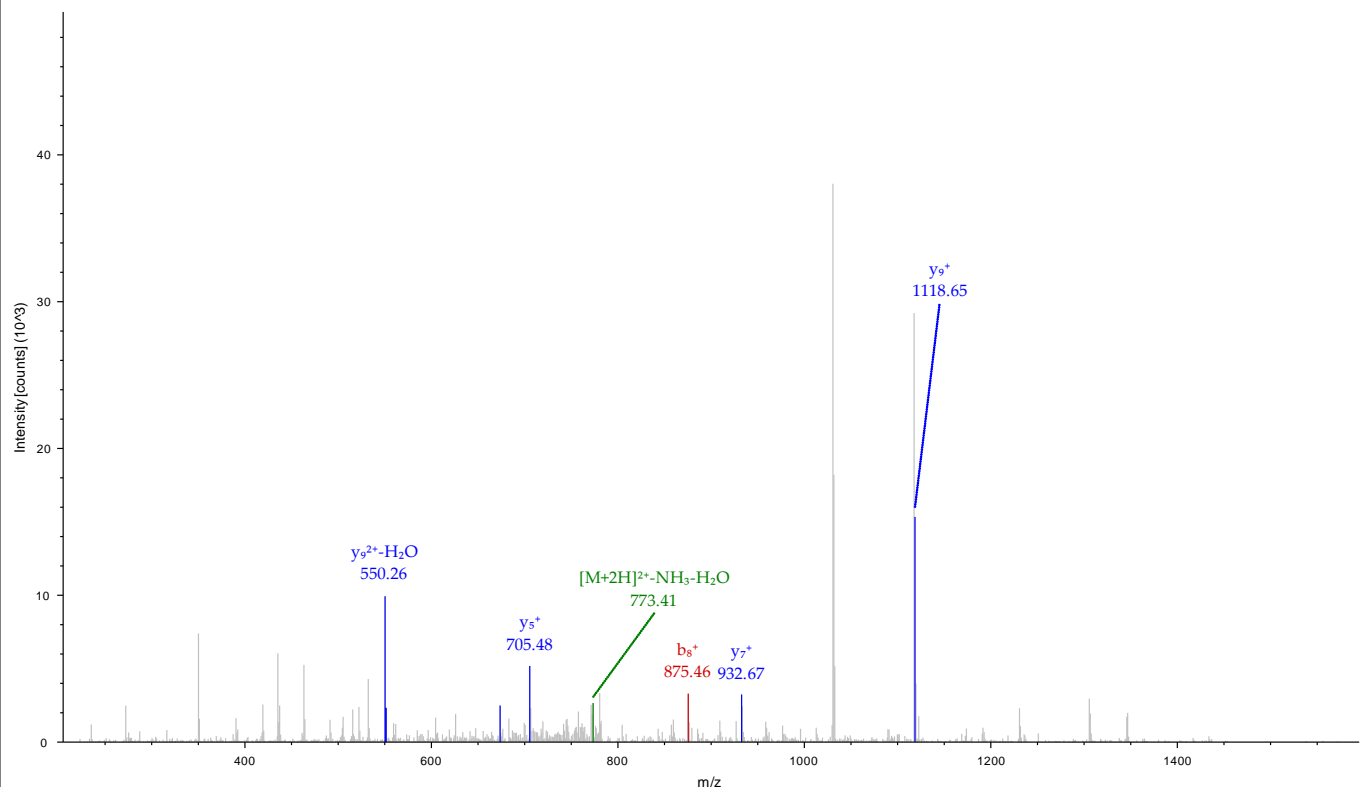



peg.2561 13081

| #1 | b <sup>+</sup> | b <sup>2+</sup> | Seq.     | y <sup>+</sup> | y <sup>2+</sup> | #2 |
|----|----------------|-----------------|----------|----------------|-----------------|----|
| 1  | 138.06619      | 69.53673        | H        |                |                 | 13 |
| 2  | 235.11896      | 118.06312       | P        | 1442.73087     | 721.86907       | 12 |
| 3  | 349.16189      | 175.08458       | N        | 1345.67810     | 673.34269       | 11 |
| 4  | 462.24596      | 231.62662       | I        | 1231.63517     | 616.32122       | 10 |
| 5  | 577.27291      | 289.14009       | D        | 1118.55110     | 559.77919       | 9  |
| 6  | 648.31003      | 324.65865       | A        | 1003.52415     | 502.26571       | 8  |
| 7  | 776.36861      | 388.68794       | Q        | 932.48703      | 466.74715       | 7  |
| 8  | 875.43703      | 438.22215       | Y        | 804.42845      | 402.71786       | 6  |
| 9  | 1045.54256     | 523.27492       | K-Acetyl | 705.36003      | 353.18365       | 5  |
| 10 | 1174.58516     | 587.79622       | E        | 535.25449      | 268.13088       | 4  |
| 11 | 1302.64374     | 651.82551       | Q        | 406.21189      | 203.60958       | 3  |
| 12 | 1433.68424     | 717.34576       | M        | 278.15331      | 139.58029       | 2  |
| 13 |                |                 | K        | 147.11281      | 74.06004        | 1  |

Extracted from: Z:\712AB\SK17-S (Ac)\Chichi-Abaumannii-SK17-S-Acetyl\_DrWu\_20140703.raw #13081 RT: 38.57  
ITMS, CID@35.00, z=+2, Mono m/z=790.39783 Da, MH+=1579.78838 Da, Match Tol.=0.6 Da

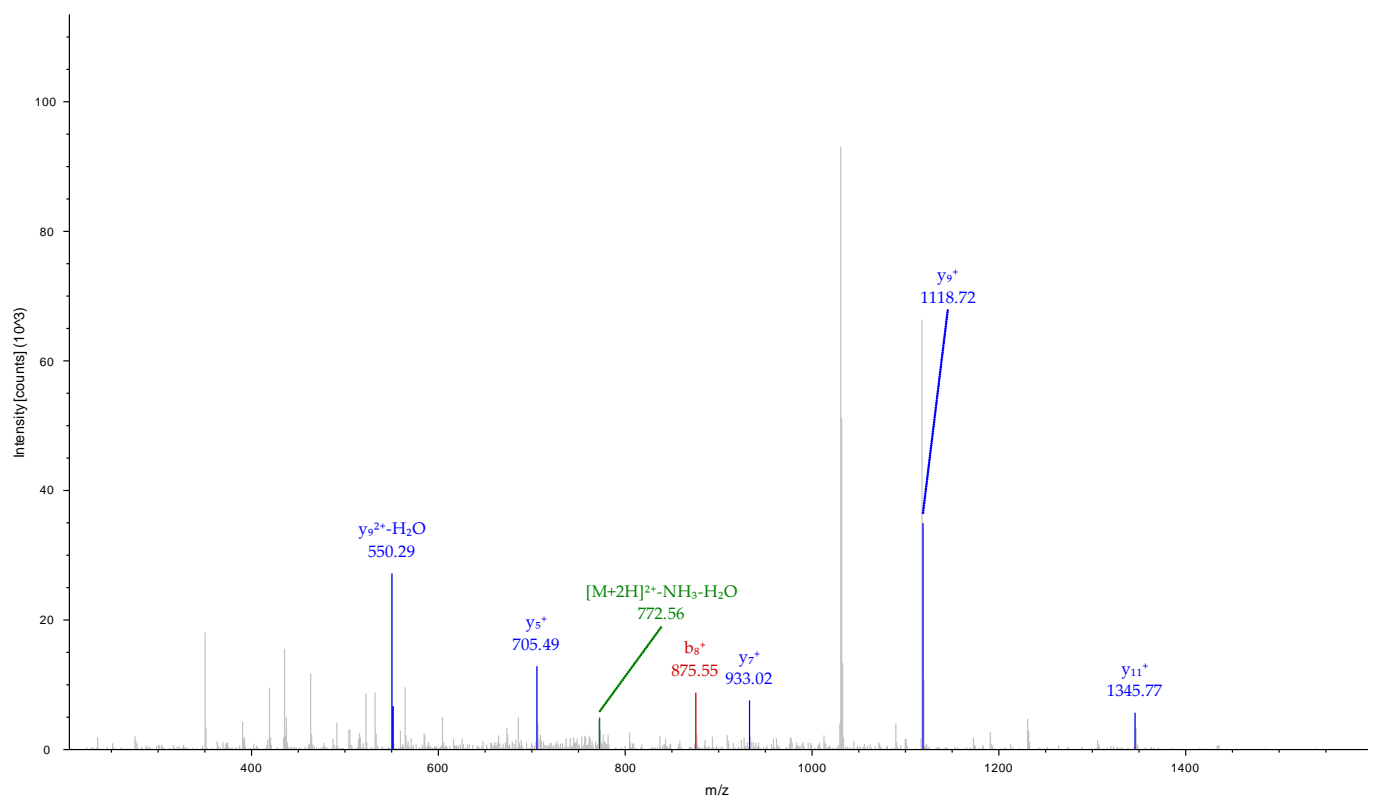

# peg.2596 8965 (K8)

| #1 | b <sup>+</sup> | b <sup>2+</sup> | b <sup>3+</sup> | Seq.     | y <sup>+</sup> | y <sup>2+</sup> | y <sup>3+</sup> | #2 |
|----|----------------|-----------------|-----------------|----------|----------------|-----------------|-----------------|----|
| 1  | 72.04440       | 36.52584        | 24.68632        | A        |                |                 |                 | 15 |
| 2  | 200.13937      | 100.57332       | 67.38464        | K        | 1643.82360     | 822.41544       | 548.61272       | 14 |
| 3  | 315.16632      | 158.08680       | 105.72696       | D        | 1515.72863     | 758.36795       | 505.91439       | 13 |
| 4  | 444.20892      | 222.60810       | 148.74116       | E        | 1400.70168     | 700.85448       | 467.57208       | 12 |
| 5  | 515.24604      | 258.12666       | 172.42020       | A        | 1271.65908     | 636.33318       | 424.55788       | 11 |
| 6  | 644.28864      | 322.64796       | 215.43440       | E        | 1200.62196     | 600.81462       | 400.87884       | 10 |
| 7  | 773.33124      | 387.16926       | 258.44860       | E        | 1071.57936     | 536.29332       | 357.86464       | 9  |
| 8  | 943.43677      | 472.22202       | 315.15044       | K-Acetyl | 942.53676      | 471.77202       | 314.85044       | 8  |
| 9  | 1072.47937     | 536.74332       | 358.16464       | E        | 772.43122      | 386.71925       | 258.14859       | 7  |
| 10 | 1143.51649     | 572.26188       | 381.84368       | A        | 643.38862      | 322.19795       | 215.13439       | 6  |
| 11 | 1242.58491     | 621.79609       | 414.86649       | V        | 572.35150      | 286.67939       | 191.45535       | 5  |
| 12 | 1313.62203     | 657.31465       | 438.54553       | A        | 473.28308      | 237.14518       | 158.43254       | 4  |
| 13 | 1427.66496     | 714.33612       | 476.55984       | N        | 402.24596      | 201.62662       | 134.75350       | 3  |
| 14 | 1540.74903     | 770.87815       | 514.25453       | L        | 288.20303      | 144.60515       | 96.73919        | 2  |
| 15 |                |                 |                 | R        | 175.11896      | 88.06312        | 59.04450        | 1  |

Extracted from: Z:\712AB\SK17-S (Ac)\Chichi-Abaumannii-SK17-R-Acetyl\_DrWu\_20140512.raw #8965 RT: 28.75  
 ITMS, CID@35.00, z=+3, Mono m/z=572.29083 Da, MH+=1714.85794 Da, Match Tol.=0.6 Da

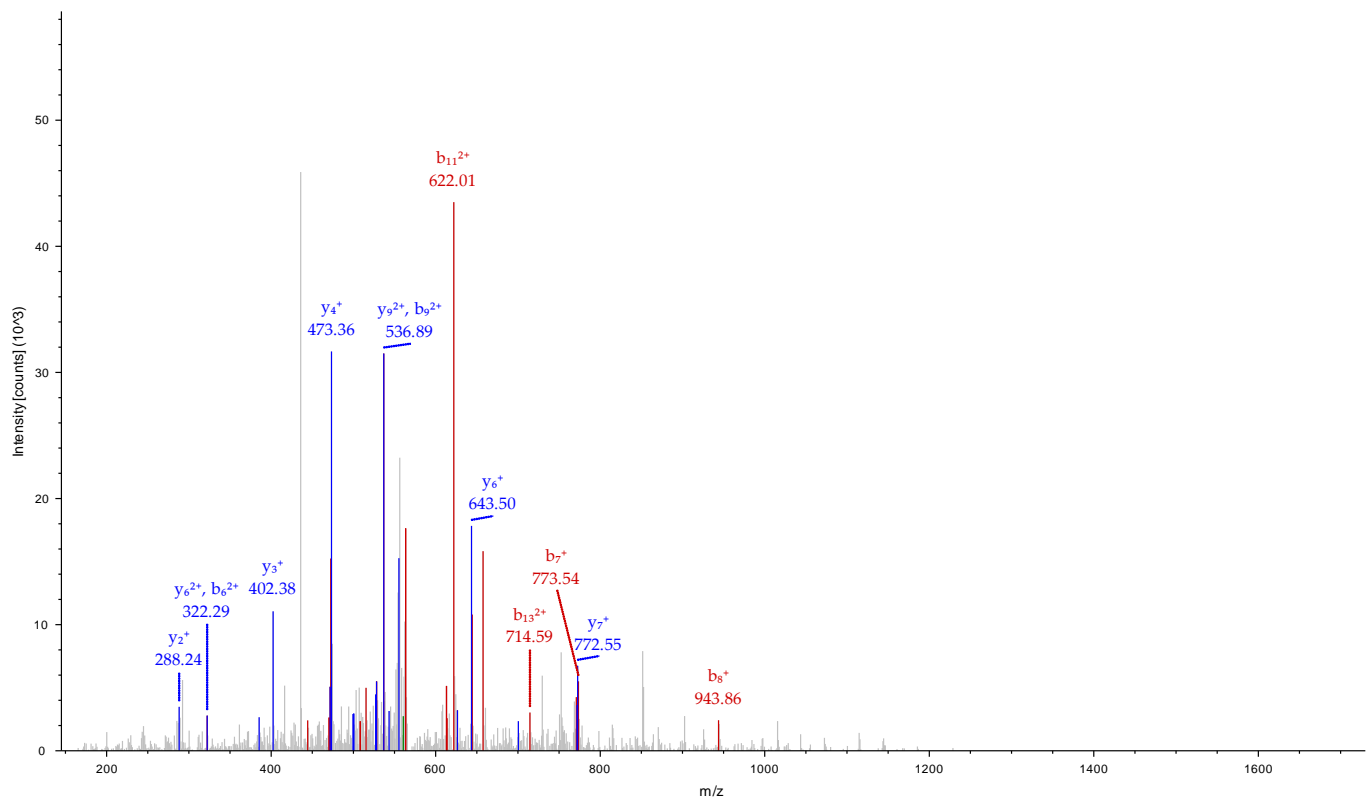

peg.2596 16841

| #1 | b <sup>+</sup> | b <sup>2+</sup> | Seq.     | y <sup>+</sup> | y <sup>2+</sup> | #2 |
|----|----------------|-----------------|----------|----------------|-----------------|----|
| 1  | 114.09135      | 57.54931        | L        |                |                 | 16 |
| 2  | 185.12847      | 93.06787        | A        | 1687.84981     | 844.42854       | 15 |
| 3  | 300.15542      | 150.58135       | D        | 1616.81269     | 808.90998       | 14 |
| 4  | 429.19802      | 215.10265       | E        | 1501.78574     | 751.39651       | 13 |
| 5  | 528.26644      | 264.63686       | V        | 1372.74314     | 686.87521       | 12 |
| 6  | 657.30904      | 329.15816       | E        | 1273.67472     | 637.34100       | 11 |
| 7  | 728.34616      | 364.67672       | A        | 1144.63212     | 572.81970       | 10 |
| 8  | 829.39384      | 415.20056       | T        | 1073.59500     | 537.30114       | 9  |
| 9  | 942.47791      | 471.74259       | L        | 972.54732      | 486.77730       | 8  |
| 10 | 1112.58344     | 556.79536       | K-Acetyl | 859.46325      | 430.23526       | 7  |
| 11 | 1183.62056     | 592.31392       | A        | 689.35771      | 345.18249       | 6  |
| 12 | 1270.65259     | 635.82993       | S        | 618.32059      | 309.66393       | 5  |
| 13 | 1399.69519     | 700.35123       | E        | 531.28856      | 266.14792       | 4  |
| 14 | 1512.77926     | 756.89327       | I        | 402.24596      | 201.62662       | 3  |
| 15 | 1626.82219     | 813.91473       | N        | 289.16189      | 145.08458       | 2  |
| 16 |                |                 | R        | 175.11896      | 88.06312        | 1  |

Extracted from: Z:\712AB\SK17-S (Ac)Chichi-Abaumannii-SK17-S-Acetyl\_DrWu\_20140703.raw #16841 RT: 47.57  
 ITMS, CID@35.00, z=+2, Mono m/z=900.97107 Da, MH+=1800.93486 Da, Match Tol.=0.6 Da

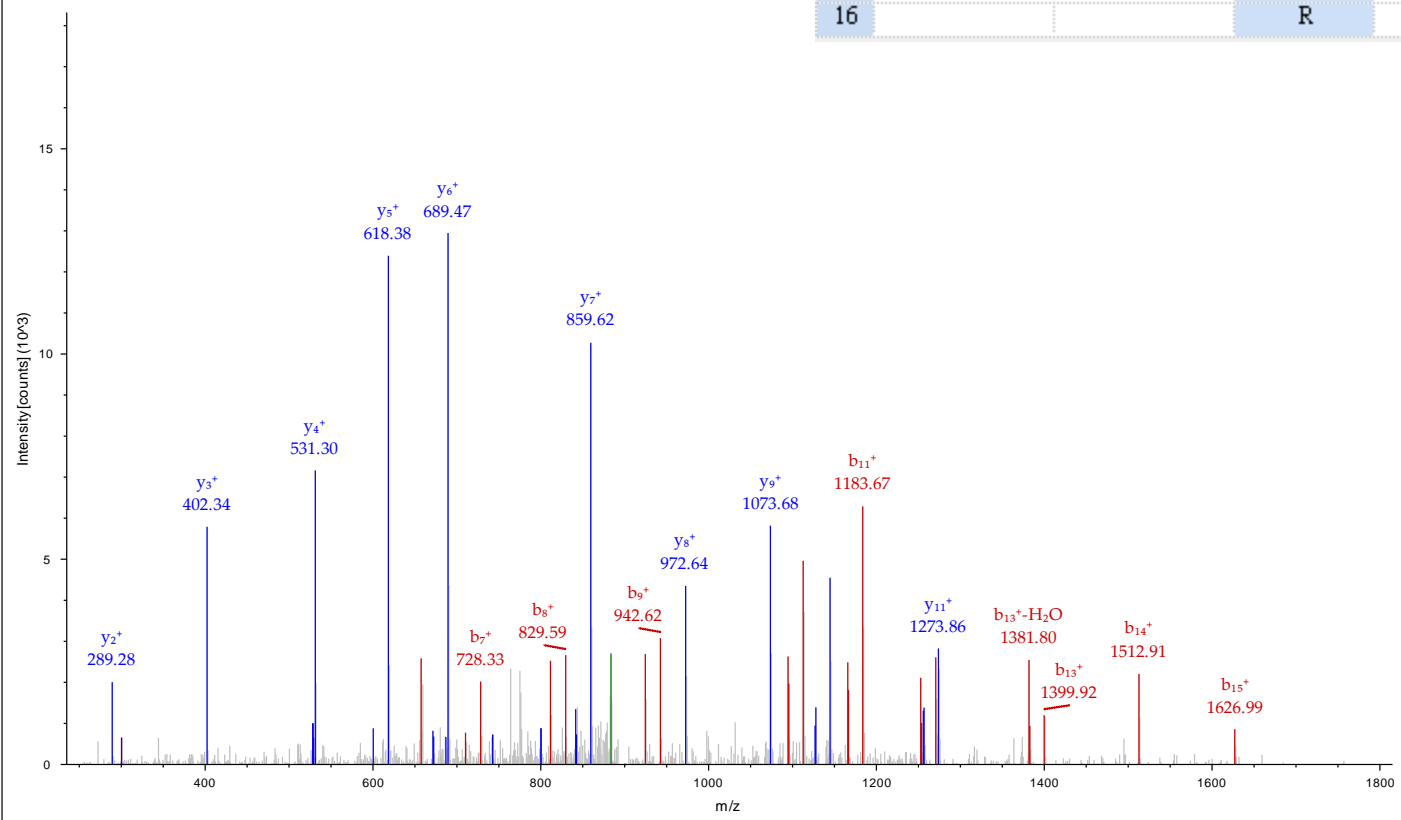

peg.2616 10965

| #1 | b <sup>+</sup> | b <sup>2+</sup> | Seq.     | y <sup>+</sup> | y <sup>2+</sup> | #2 |
|----|----------------|-----------------|----------|----------------|-----------------|----|
| 1  | 158.04479      | 79.52603        | D-Acetyl |                |                 | 11 |
| 2  | 344.12411      | 172.56569       | W        | 1372.67438     | 686.84083       | 10 |
| 3  | 431.15614      | 216.08171       | S        | 1186.59506     | 593.80117       | 9  |
| 4  | 560.19874      | 280.60301       | E        | 1099.56303     | 550.28515       | 8  |
| 5  | 657.25151      | 329.12939       | P        | 970.52043      | 485.76385       | 7  |
| 6  | 827.35705      | 414.18216       | K-Acetyl | 873.46766      | 437.23747       | 6  |
| 7  | 955.41563      | 478.21145       | Q        | 703.36213      | 352.18470       | 5  |
| 8  | 1084.45823     | 542.73275       | E        | 575.30355      | 288.15541       | 4  |
| 9  | 1254.56376     | 627.78552       | K-Acetyl | 446.26095      | 223.63411       | 3  |
| 10 | 1383.60636     | 692.30682       | E        | 276.15541      | 138.58134       | 2  |
| 11 |                |                 | K        | 147.11281      | 74.06004        | 1  |

Extracted from: Z:\712AB\SK17-S (Ac)\Chichi-Abaumannii-SK17-R-Acetyl\_DrWu\_20140512.raw #10965 RT: 33.43  
 ITMS, CID@35.00, z=+2, Mono m/z=765.35645 Da, MH+=1529.70561 Da, Match Tol.=0.6 Da

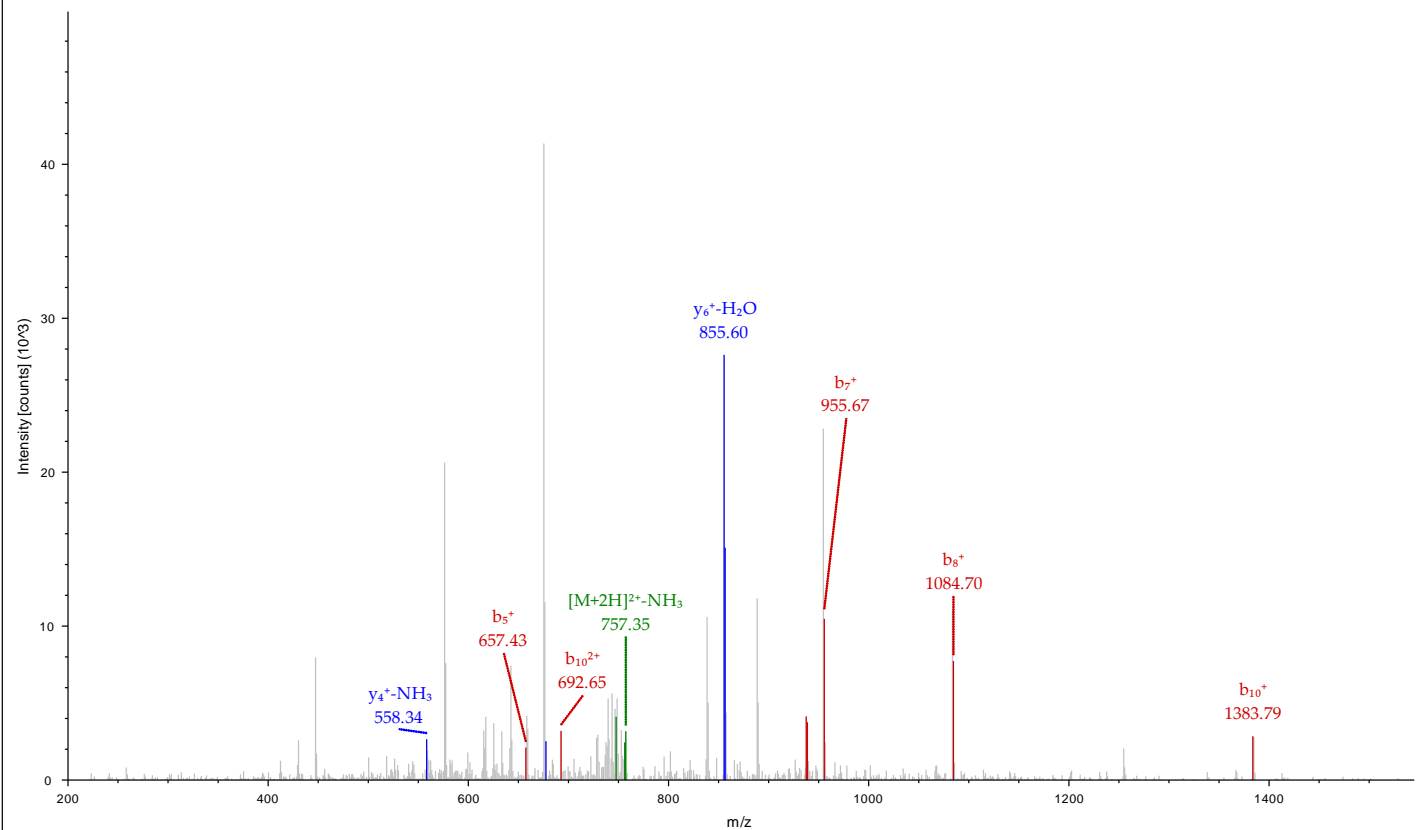

peg.2616 10869

| #1 | b <sup>+</sup> | b <sup>2+</sup> | Seq.     | y <sup>+</sup> | y <sup>2+</sup> | #2 |
|----|----------------|-----------------|----------|----------------|-----------------|----|
| 1  | 158.04479      | 79.52603        | D-Acetyl |                |                 | 11 |
| 2  | 344.12411      | 172.56569       | W        | 1372.67438     | 686.84083       | 10 |
| 3  | 431.15614      | 216.08171       | S        | 1186.59506     | 593.80117       | 9  |
| 4  | 560.19874      | 280.60301       | E        | 1099.56303     | 550.28515       | 8  |
| 5  | 657.25151      | 329.12939       | P        | 970.52043      | 485.76385       | 7  |
| 6  | 827.35705      | 414.18216       | K-Acetyl | 873.46766      | 437.23747       | 6  |
| 7  | 955.41563      | 478.21145       | Q        | 703.36213      | 352.18470       | 5  |
| 8  | 1084.45823     | 542.73275       | E        | 575.30355      | 288.15541       | 4  |
| 9  | 1254.56376     | 627.78552       | K-Acetyl | 446.26095      | 223.63411       | 3  |
| 10 | 1383.60636     | 692.30682       | E        | 276.15541      | 138.58134       | 2  |
| 11 |                |                 | K        | 147.11281      | 74.06004        | 1  |

Extracted from: Z:\712AB\SK17-S (Ac)\Chichi-Abaumannii-SK17-S-Acetyl\_DrWu\_20140703.raw #10869 RT: 33.35  
 ITMS, CID@35.00, z=+2, Mono m/z=765.35828 Da, MH+=1529.70928 Da, Match Tol.=0.6 Da

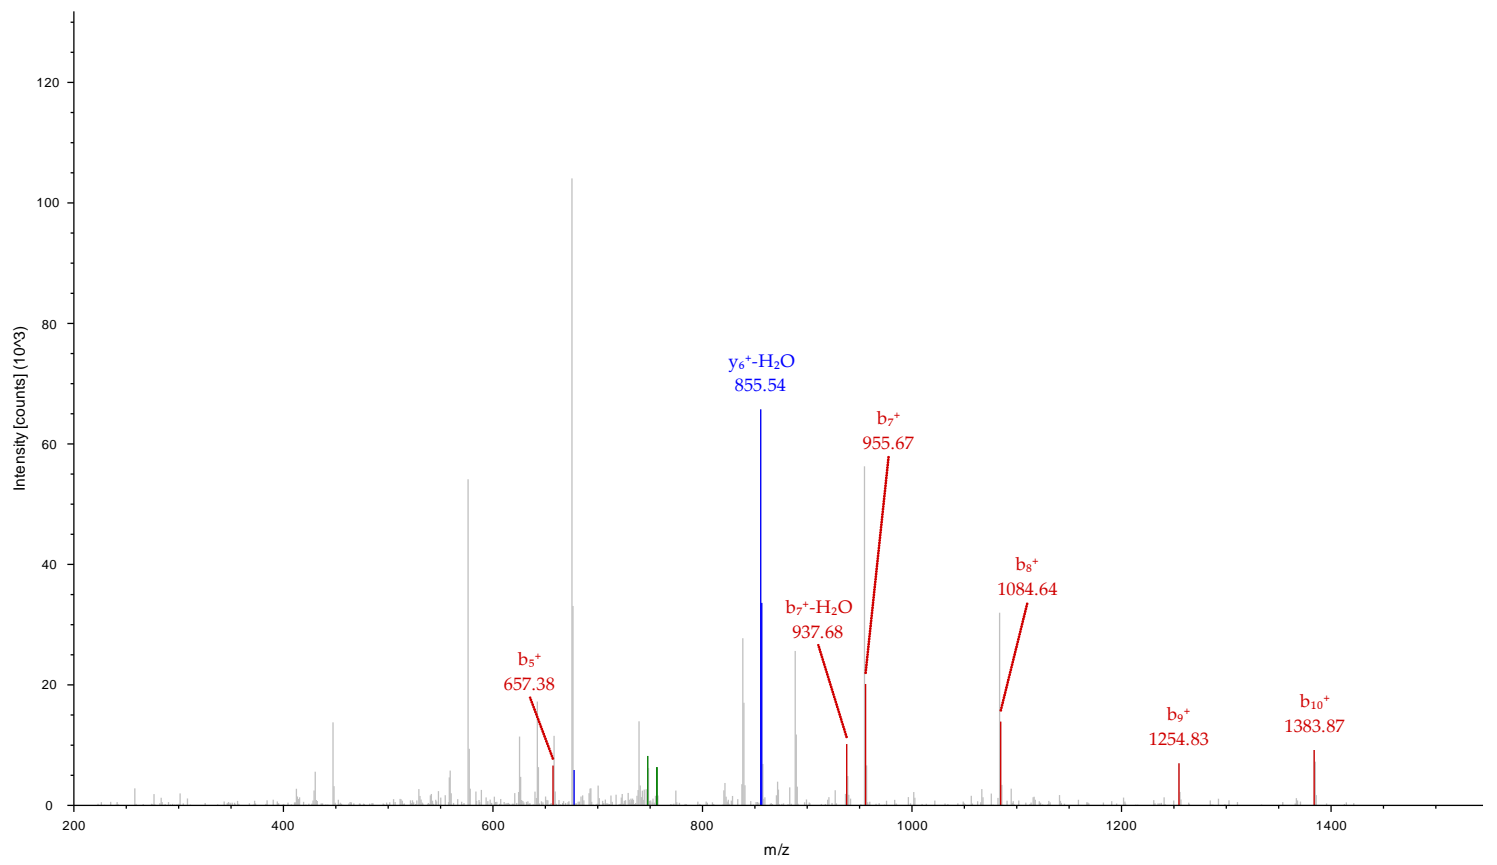

# peg.2662 19127

| #1 | b <sup>+</sup> | b <sup>2+</sup> | b <sup>3+</sup> | Seq.        | y <sup>+</sup> | y <sup>2+</sup> | y <sup>3+</sup> | #2 |
|----|----------------|-----------------|-----------------|-------------|----------------|-----------------|-----------------|----|
| 1  | 114.05496      | 57.53112        | 38.68984        | A-Acetyl    |                |                 |                 | 20 |
| 2  | 243.09756      | 122.05242       | 81.70404        | E           | 2367.13268     | 1184.06998      | 789.71574       | 19 |
| 3  | 429.17688      | 215.09208       | 143.73048       | W           | 2238.09008     | 1119.54868      | 746.70154       | 18 |
| 4  | 576.21230      | 288.60979       | 192.74228       | M-Oxidation | 2052.01076     | 1026.50902      | 684.67510       | 17 |
| 5  | 713.27121      | 357.13924       | 238.42859       | H           | 1904.97534     | 952.99131       | 635.66330       | 16 |
| 6  | 860.33963      | 430.67345       | 287.45139       | F           | 1767.91643     | 884.46185       | 589.97699       | 15 |
| 7  | 973.42370      | 487.21549       | 325.14608       | I           | 1620.84801     | 810.92764       | 540.95419       | 14 |
| 8  | 1060.45573     | 530.73150       | 354.15676       | S           | 1507.76394     | 754.38561       | 503.25950       | 13 |
| 9  | 1131.49285     | 566.25006       | 377.83580       | A           | 1420.73191     | 710.86959       | 474.24882       | 12 |
| 10 | 1246.51980     | 623.76354       | 416.17812       | D           | 1349.69479     | 675.35103       | 450.56978       | 11 |
| 11 | 1374.61477     | 687.81102       | 458.87644       | K           | 1234.66784     | 617.83756       | 412.22746       | 10 |
| 12 | 1445.65189     | 723.32958       | 482.55548       | A           | 1106.57287     | 553.79007       | 369.52914       | 9  |
| 13 | 1592.72031     | 796.86379       | 531.57829       | F           | 1035.53575     | 518.27151       | 345.85010       | 8  |
| 14 | 1762.82584     | 881.91656       | 588.28013       | K-Acetyl    | 888.46733      | 444.73730       | 296.82729       | 7  |
| 15 | 1875.90991     | 938.45859       | 625.97482       | L           | 718.36180      | 359.68454       | 240.12545       | 6  |
| 16 | 2004.95251     | 1002.97989      | 668.98902       | E           | 605.27773      | 303.14250       | 202.43076       | 5  |
| 17 | 2075.98963     | 1038.49845      | 692.66806       | A           | 476.23513      | 238.62120       | 159.41656       | 4  |
| 18 | 2205.03223     | 1103.01975      | 735.68226       | E           | 405.19801      | 203.10264       | 135.73752       | 3  |
| 19 | 2292.06426     | 1146.53577      | 764.69294       | S           | 276.15541      | 138.58134       | 92.72332        | 2  |
| 20 |                |                 |                 | K-Acetyl    | 189.12338      | 95.06533        | 63.71264        | 1  |

Extracted from: Z:\712AB\SK17-S (Ac)\Chichi-Abaumannii-SK17-R-Acetyl\_DrWu\_20140512.raw #19127 RT: 53.88 ITMS, CID@35.00, z=+3, Mono m/z=827.39850 Da, MH+=2480.18094 Da, Match Tol.=0.6 Da

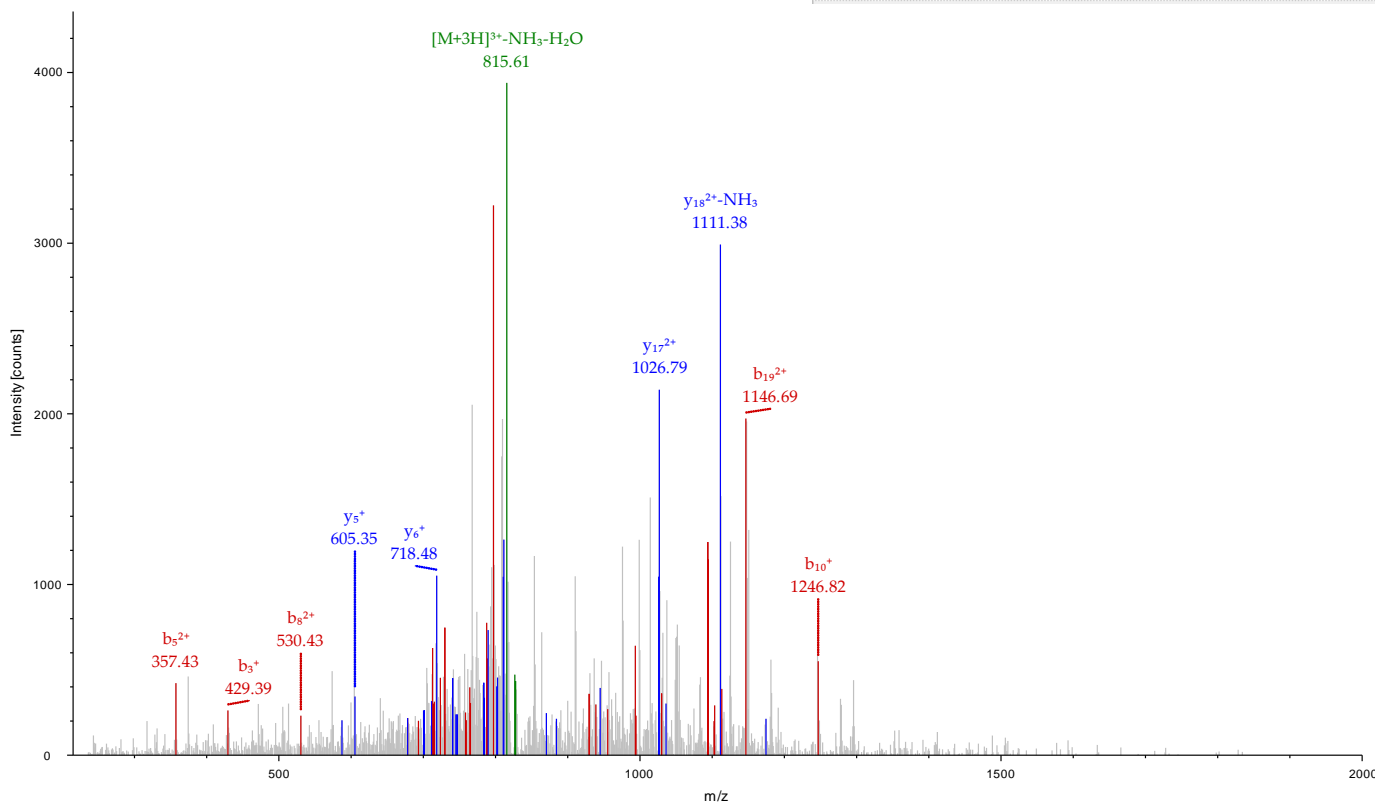

peg.2692 21160

| #1 | b <sup>+</sup> | b <sup>2+</sup> | Seq.     | y <sup>+</sup> | y <sup>2+</sup> | #2 |
|----|----------------|-----------------|----------|----------------|-----------------|----|
| 1  | 100.07570      | 50.54149        | V        |                |                 | 11 |
| 2  | 228.13428      | 114.57078       | Q        | 1172.61581     | 586.81154       | 10 |
| 3  | 285.15575      | 143.08151       | G        | 1044.55723     | 522.78225       | 9  |
| 4  | 414.19835      | 207.60281       | E        | 987.53576      | 494.27152       | 8  |
| 5  | 584.30388      | 292.65558       | K-Acetyl | 858.49316      | 429.75022       | 7  |
| 6  | 655.34100      | 328.17414       | A        | 688.38762      | 344.69745       | 6  |
| 7  | 768.42507      | 384.71617       | L        | 617.35050      | 309.17889       | 5  |
| 8  | 897.46767      | 449.23747       | E        | 504.26643      | 252.63685       | 4  |
| 9  | 1012.49462     | 506.75095       | D        | 375.22383      | 188.11555       | 3  |
| 10 | 1125.57869     | 563.29298       | L        | 260.19688      | 130.60208       | 2  |
| 11 |                |                 | K        | 147.11281      | 74.06004        | 1  |

Extracted from: Z:\712AB\SK17-S (Ac)Chichi-Abaumannii-SK17-R-Acetyl\_DrWu\_20140512.raw #21160 RT: 59.86  
 ITMS, CID@35.00, z=+2, Mono m/z=636.34680 Da, MH+=1271.68633 Da, Match Tol.=0.6 Da

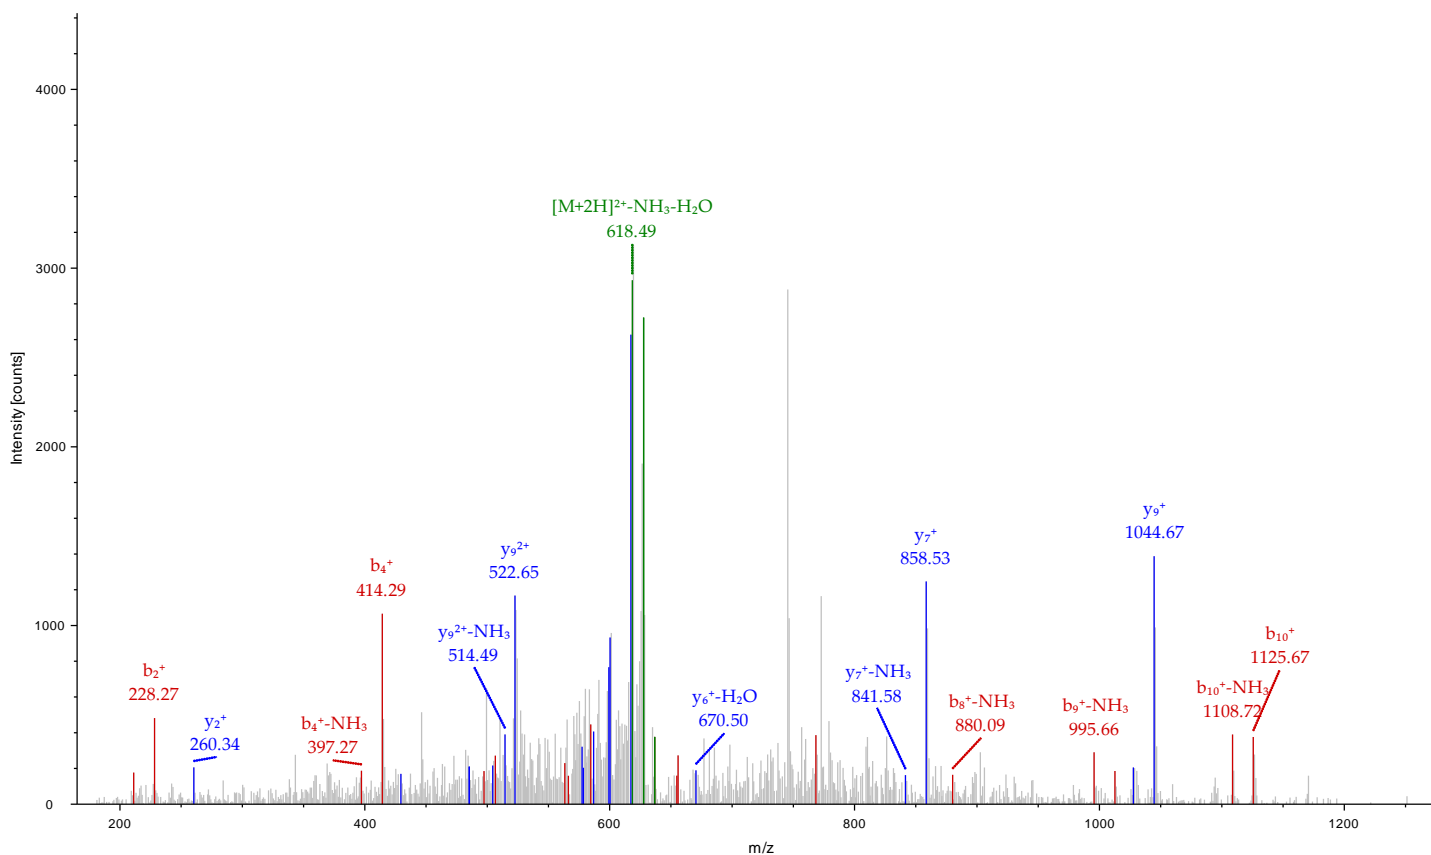

peg.2692 19363

| #1 | b <sup>+</sup> | b <sup>2+</sup> | Seq.     | y <sup>+</sup> | y <sup>2+</sup> | #2 |
|----|----------------|-----------------|----------|----------------|-----------------|----|
| 1  | 100.07570      | 50.54149        | V        |                |                 | 11 |
| 2  | 228.13428      | 114.57078       | Q        | 1172.61581     | 586.81154       | 10 |
| 3  | 285.15575      | 143.08151       | G        | 1044.55723     | 522.78225       | 9  |
| 4  | 414.19835      | 207.60281       | E        | 987.53576      | 494.27152       | 8  |
| 5  | 584.30388      | 292.65558       | K-Acetyl | 858.49316      | 429.75022       | 7  |
| 6  | 655.34100      | 328.17414       | A        | 688.38762      | 344.69745       | 6  |
| 7  | 768.42507      | 384.71617       | L        | 617.35050      | 309.17889       | 5  |
| 8  | 897.46767      | 449.23747       | E        | 504.26643      | 252.63685       | 4  |
| 9  | 1012.49462     | 506.75095       | D        | 375.22383      | 188.11555       | 3  |
| 10 | 1125.57869     | 563.29298       | L        | 260.19688      | 130.60208       | 2  |
| 11 |                |                 | K        | 147.11281      | 74.06004        | 1  |

Extracted from: Z:\712AB\SK17-S (Ac)Chichi-Abaumannii-SK17-S-Acetyl\_DrWu\_20140512.raw #19363 RT: 59.06  
 ITMS, CID@35.00, z=+2, Mono m/z=636.34729 Da, MH+=1271.68730 Da, Match Tol.=0.6 Da

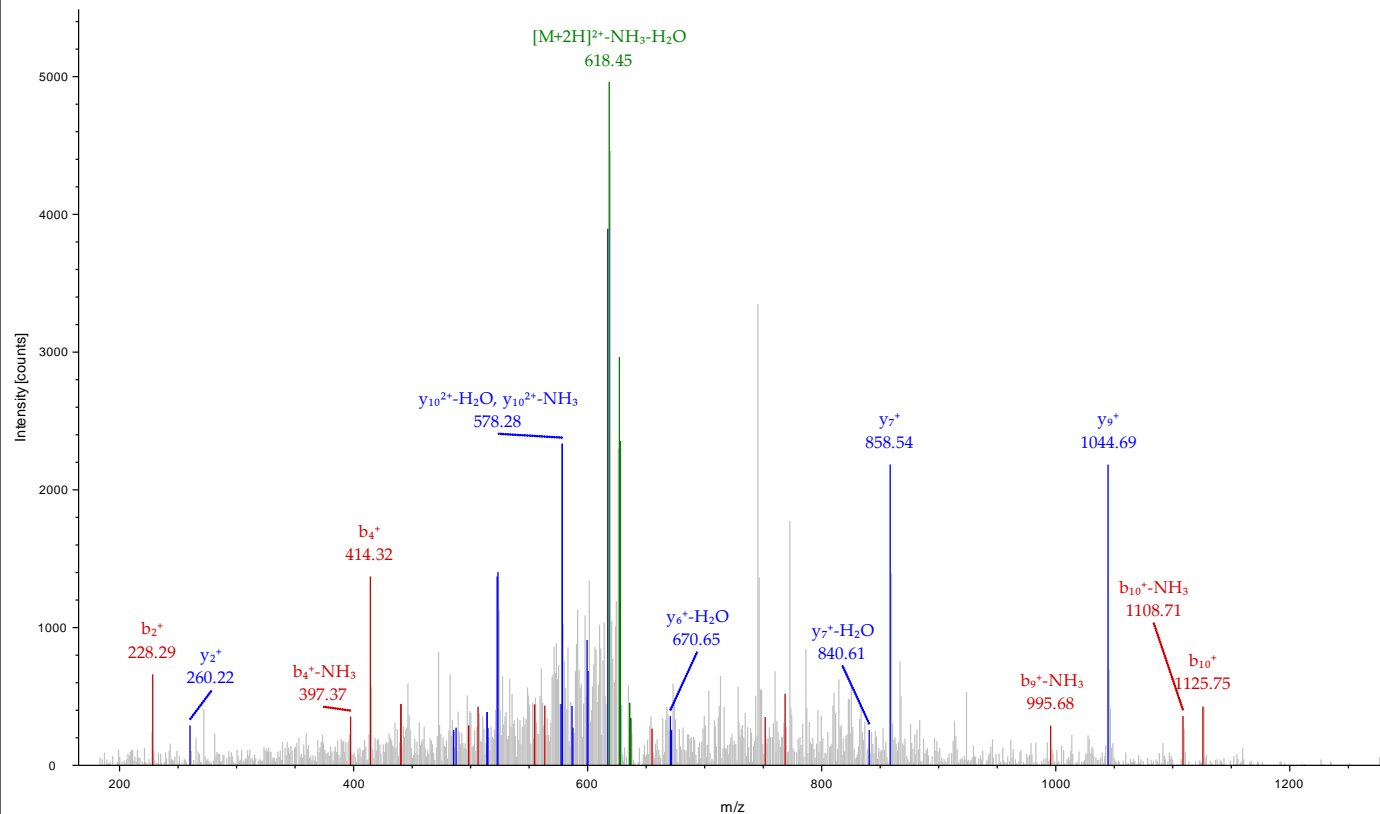



peg.2693 22599

| #1 | b <sup>+</sup> | b <sup>2+</sup> | b <sup>3+</sup> | Seq.     | y <sup>+</sup> | y <sup>2+</sup> | y <sup>3+</sup> | #2 |
|----|----------------|-----------------|-----------------|----------|----------------|-----------------|-----------------|----|
| 1  | 130.04988      | 65.52858        | 44.02148        | E        |                |                 |                 | 25 |
| 2  | 201.08700      | 101.04714       | 67.70052        | A        | 2703.39245     | 1352.19986      | 901.80233       | 24 |
| 3  | 258.10847      | 129.55787       | 86.70767        | G        | 2632.35533     | 1316.68130      | 878.12329       | 23 |
| 4  | 372.15140      | 186.57934       | 124.72198       | N        | 2575.33386     | 1288.17057      | 859.11614       | 22 |
| 5  | 485.23547      | 243.12137       | 162.41667       | I        | 2461.29093     | 1231.14910      | 821.10183       | 21 |
| 6  | 556.27259      | 278.63993       | 186.09571       | A        | 2348.20686     | 1174.60707      | 783.40714       | 20 |
| 7  | 655.34101      | 328.17414       | 219.11852       | V        | 2277.16974     | 1139.08851      | 759.72810       | 19 |
| 8  | 811.44213      | 406.22470       | 271.15223       | R        | 2178.10132     | 1089.55430      | 726.70529       | 18 |
| 9  | 908.49490      | 454.75109       | 303.50315       | P        | 2022.00020     | 1011.50374      | 674.67158       | 17 |
| 10 | 1007.56332     | 504.28530       | 336.52596       | V        | 1924.94743     | 962.97735       | 642.32066       | 16 |
| 11 | 1108.61100     | 554.80914       | 370.20852       | T        | 1825.87901     | 913.44314       | 609.29785       | 15 |
| 12 | 1236.66958     | 618.83843       | 412.89471       | Q        | 1724.83133     | 862.91930       | 575.61529       | 14 |
| 13 | 1349.75365     | 675.38046       | 450.58940       | L        | 1596.77275     | 798.89001       | 532.92910       | 13 |
| 14 | 1496.82207     | 748.91467       | 499.61221       | F        | 1483.68868     | 742.34798       | 495.23441       | 12 |
| 15 | 1611.84902     | 806.42815       | 537.95452       | D        | 1336.62026     | 668.81377       | 446.21160       | 11 |
| 16 | 1708.90179     | 854.95453       | 570.30545       | P        | 1221.59331     | 611.30029       | 407.86929       | 10 |
| 17 | 1837.94439     | 919.47583       | 613.31965       | E        | 1124.54054     | 562.77391       | 375.51836       | 9  |
| 18 | 2008.04992     | 1004.52860      | 670.02149       | K-Acetyl | 995.49794      | 498.25261       | 332.50416       | 8  |
| 19 | 2065.07139     | 1033.03933      | 689.02865       | G        | 825.39240      | 413.19984       | 275.80232       | 7  |
| 20 | 2196.11189     | 1098.55958      | 732.70881       | M        | 768.37093      | 384.68910       | 256.79516       | 6  |
| 21 | 2343.18031     | 1172.09379      | 781.73162       | F        | 637.33043      | 319.16885       | 213.11499       | 5  |
| 22 | 2456.26438     | 1228.63583      | 819.42631       | L        | 490.26201      | 245.63464       | 164.09219       | 4  |
| 23 | 2543.29641     | 1272.15184      | 848.43699       | S        | 377.17794      | 189.09261       | 126.39750       | 3  |
| 24 | 2658.32336     | 1329.66532      | 886.77930       | D        | 290.14591      | 145.57659       | 97.38682        | 2  |
| 25 |                |                 |                 | R        | 175.11896      | 88.06312        | 59.04450        | 1  |

Extracted from: Z:\712AB\SK17-S (Ac)Chichi-Abaumannii-SK17-S-Acetyl\_DrWu\_20140512.raw #22599 RT: 68.21  
 ITMS, CID@35.00, z=+3, Mono m/z=944.81531 Da, MH+=2832.43137 Da, Match Tol=0.6 Da

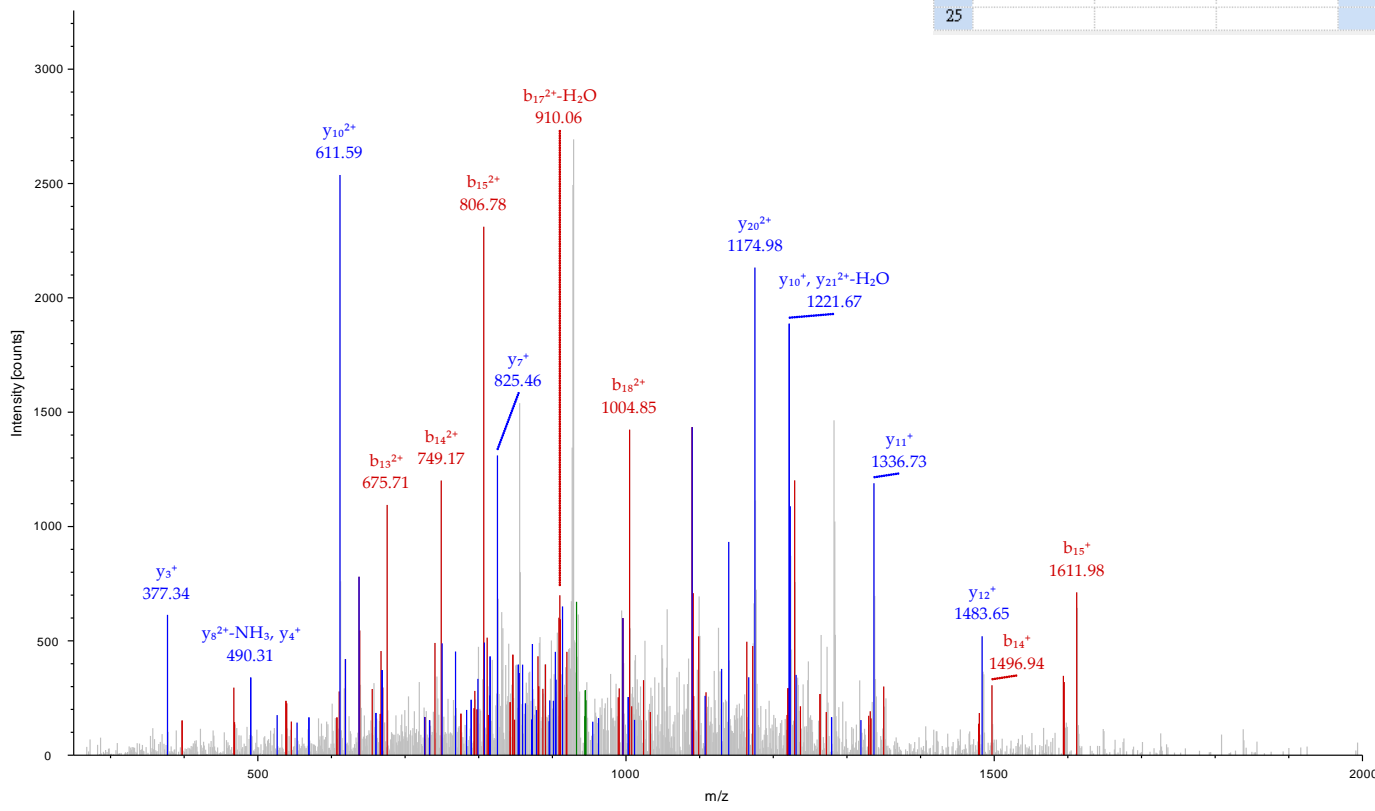

# peg.2730 6501

| #1 | b <sup>+</sup> | b <sup>2+</sup> | b <sup>3+</sup> | Seq.        | y <sup>+</sup> | y <sup>2+</sup> | y <sup>3+</sup> | #2 |
|----|----------------|-----------------|-----------------|-------------|----------------|-----------------|-----------------|----|
| 1  | 130.04988      | 65.52858        | 44.02148        | E           |                |                 |                 | 15 |
| 2  | 229.11830      | 115.06279       | 77.04428        | V           | 1711.87966     | 856.44347       | 571.29807       | 14 |
| 3  | 330.16598      | 165.58663       | 110.72684       | T           | 1612.81124     | 806.90926       | 538.27526       | 13 |
| 4  | 387.18745      | 194.09736       | 129.73400       | G           | 1511.76356     | 756.38542       | 504.59270       | 12 |
| 5  | 500.27152      | 250.63940       | 167.42869       | L           | 1454.74209     | 727.87468       | 485.58555       | 11 |
| 6  | 670.37705      | 335.69216       | 224.13053       | K-Acetyl    | 1341.65802     | 671.33265       | 447.89086       | 10 |
| 7  | 785.40400      | 393.20564       | 262.47285       | D           | 1171.55249     | 586.27988       | 391.18901       | 9  |
| 8  | 898.48807      | 449.74767       | 300.16754       | L           | 1056.52554     | 528.76641       | 352.84670       | 8  |
| 9  | 1045.52349     | 523.26538       | 349.17935       | M-Oxidation | 943.44147      | 472.22437       | 315.15201       | 7  |
| 10 | 1173.58207     | 587.29467       | 391.86554       | Q           | 796.40605      | 398.70666       | 266.14020       | 6  |
| 11 | 1301.64065     | 651.32396       | 434.55173       | Q           | 668.34747      | 334.67737       | 223.45401       | 5  |
| 12 | 1438.69956     | 719.85342       | 480.23804       | H           | 540.28889      | 270.64808       | 180.76781       | 4  |
| 13 | 1567.74216     | 784.37472       | 523.25224       | E           | 403.22998      | 202.11863       | 135.08151       | 3  |
| 14 | 1666.81058     | 833.90893       | 556.27504       | V           | 274.18738      | 137.59733       | 92.06731        | 2  |
| 15 |                |                 |                 | R           | 175.11896      | 88.06312        | 59.04450        | 1  |

Extracted from: Z:\712AB\SK17-S (Ac)Chichi-Abaumannii-SK17-R-Acetyl\_DrWu\_20140512.raw #6501 RT: 23.08  
 ITMS, CID@35.00, z=+3, Mono m/z=614.31104 Da, MH+=1840.91855 Da, Match Tol.=0.6 Da

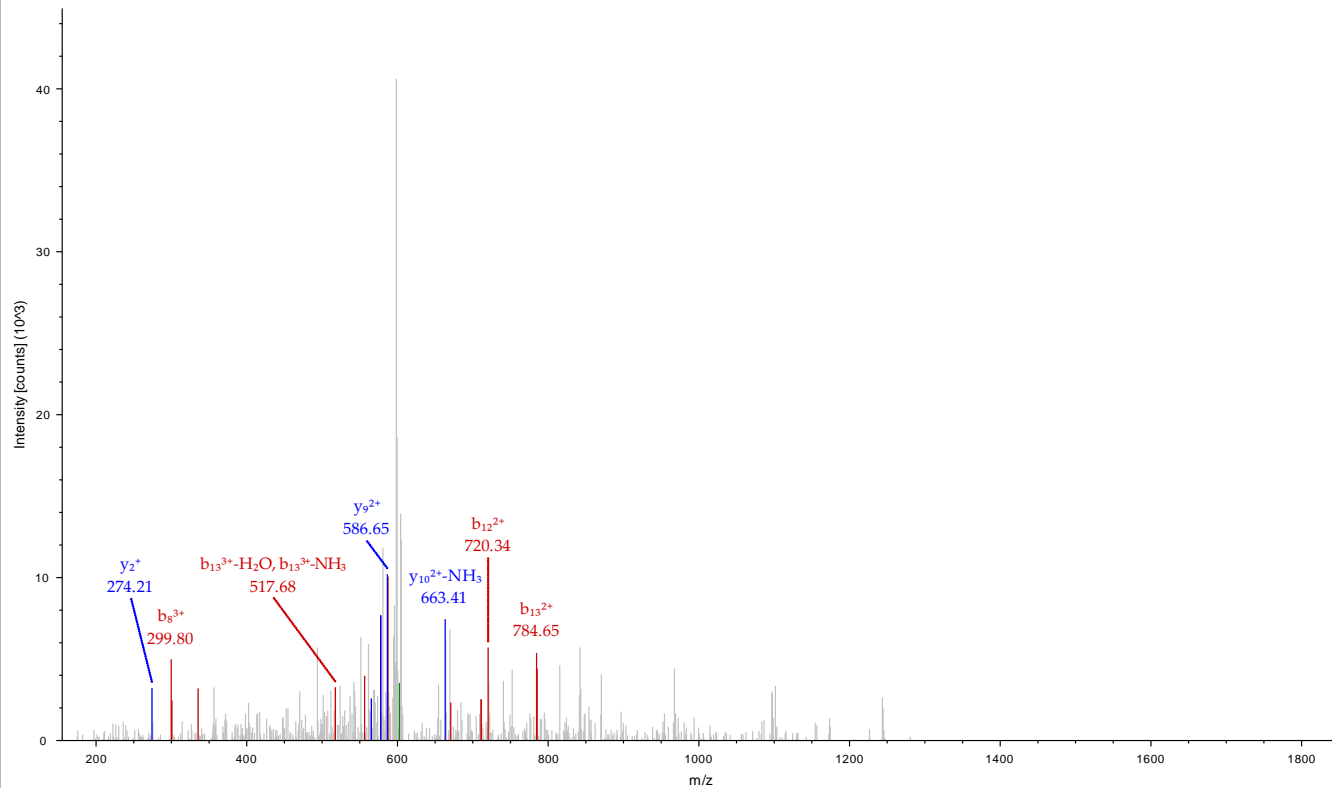

peg.2792 23943

| #1 | b <sup>+</sup> | b <sup>2+</sup> | b <sup>3+</sup> | Seq.        | y <sup>+</sup> | y <sup>2+</sup> | y <sup>3+</sup> | #2 |
|----|----------------|-----------------|-----------------|-------------|----------------|-----------------|-----------------|----|
| 1  | 148.04269      | 74.52498        | 50.01908        | M-Oxidation |                |                 |                 | 20 |
| 2  | 263.06964      | 132.03846       | 88.36140        | D           | 2136.17725     | 1068.59226      | 712.73060       | 19 |
| 3  | 377.11257      | 189.05992       | 126.37571       | N           | 2021.15030     | 1011.07879      | 674.38828       | 18 |
| 4  | 464.14460      | 232.57594       | 155.38638       | S           | 1907.10737     | 954.05732       | 636.37397       | 17 |
| 5  | 634.25014      | 317.62871       | 212.08823       | K-Acetyl    | 1820.07534     | 910.54131       | 607.36330       | 16 |
| 6  | 747.33421      | 374.17074       | 249.78292       | L           | 1649.96980     | 825.48854       | 550.66145       | 15 |
| 7  | 844.38698      | 422.69713       | 282.13384       | P           | 1536.88573     | 768.94650       | 512.96676       | 14 |
| 8  | 957.47105      | 479.23916       | 319.82853       | I           | 1439.83296     | 720.42012       | 480.61584       | 13 |
| 9  | 1071.51398     | 536.26063       | 357.84284       | N           | 1326.74889     | 663.87808       | 442.92115       | 12 |
| 10 | 1199.57256     | 600.28992       | 400.52904       | Q           | 1212.70596     | 606.85662       | 404.90684       | 11 |
| 11 | 1312.65663     | 656.83195       | 438.22373       | I           | 1084.64738     | 542.82733       | 362.22064       | 10 |
| 12 | 1425.74070     | 713.37399       | 475.91842       | I           | 971.56331      | 486.28529       | 324.52595       | 9  |
| 13 | 1496.77782     | 748.89255       | 499.59746       | A           | 858.47924      | 429.74326       | 286.83126       | 8  |
| 14 | 1652.87894     | 826.94311       | 551.63116       | R           | 787.44212      | 394.22470       | 263.15222       | 7  |
| 15 | 1765.96301     | 883.48514       | 589.32585       | I           | 631.34100      | 316.17414       | 211.11852       | 6  |
| 16 | 1880.00594     | 940.50661       | 627.34016       | N           | 518.25693      | 259.63210       | 173.42383       | 5  |
| 17 | 1995.03289     | 998.02008       | 665.68248       | D           | 404.21400      | 202.61064       | 135.40952       | 4  |
| 18 | 2066.07001     | 1033.53864      | 689.36152       | A           | 289.18705      | 145.09716       | 97.06720        | 3  |
| 19 | 2137.10713     | 1069.05720      | 713.04056       | A           | 218.14993      | 109.57860       | 73.38816        | 2  |
| 20 |                |                 |                 | K           | 147.11281      | 74.06004        | 49.70912        | 1  |

Extracted from: Z:\712AB\SK17-S (Ac)Chichi-Abaumannii-SK17-R-Acetyl\_DrWu\_20140703.raw #23943 RT: 65.85  
 ITMS, CID@35.00, z=+3, Mono m/z=761.73621 Da, MH+=2283.19406 Da, Match Tol.=0.6 Da

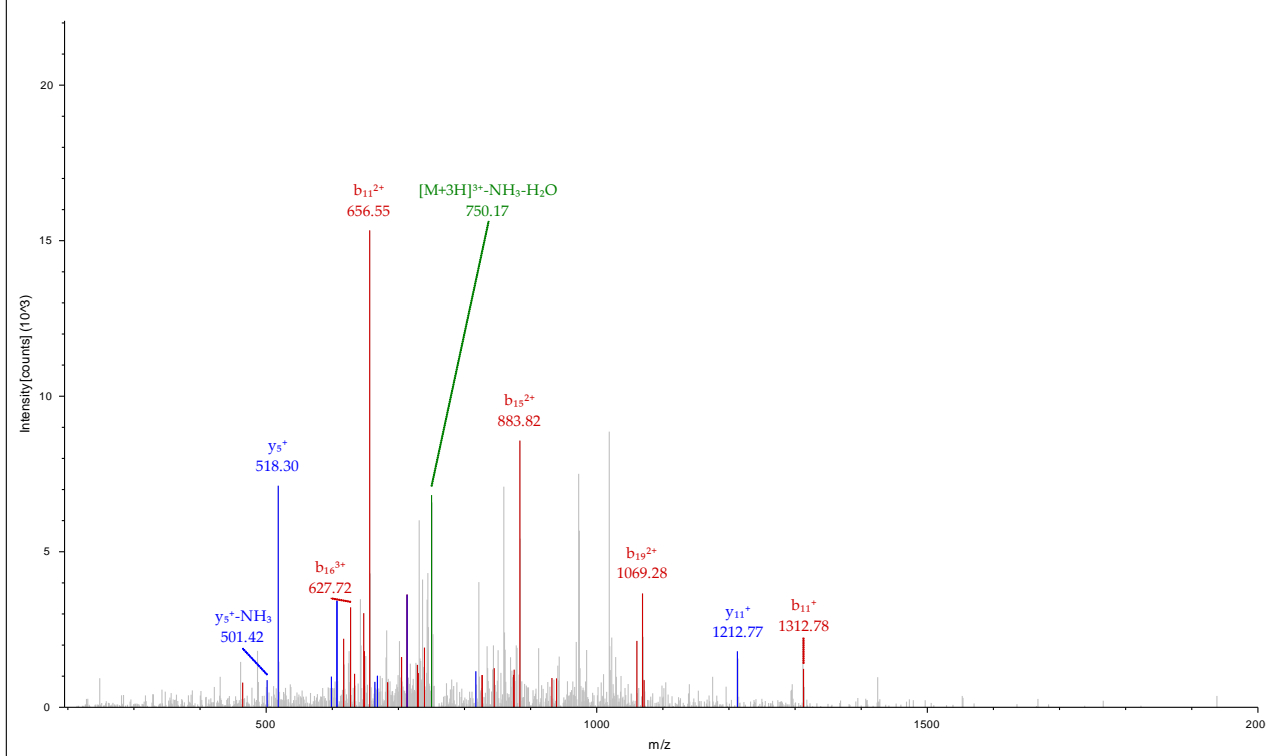

peg.2802 15219

| #1 | b <sup>+</sup> | b <sup>2+</sup> | b <sup>3+</sup> | Seq.     | y <sup>+</sup> | y <sup>2+</sup> | y <sup>3+</sup> | #2 |
|----|----------------|-----------------|-----------------|----------|----------------|-----------------|-----------------|----|
| 1  | 114.05496      | 57.53112        | 38.68984        | A-Acetyl |                |                 |                 | 13 |
| 2  | 243.09756      | 122.05242       | 81.70404        | E        | 1586.80748     | 793.90738       | 529.60734       | 12 |
| 3  | 356.18163      | 178.59445       | 119.39873       | L        | 1457.76488     | 729.38608       | 486.59314       | 11 |
| 4  | 542.26095      | 271.63411       | 181.42517       | W        | 1344.68081     | 672.84404       | 448.89845       | 10 |
| 5  | 629.29298      | 315.15013       | 210.43584       | S        | 1158.60149     | 579.80438       | 386.87201       | 9  |
| 6  | 815.37230      | 408.18979       | 272.46228       | W        | 1071.56946     | 536.28837       | 357.86134       | 8  |
| 7  | 971.47342      | 486.24035       | 324.49599       | R        | 885.49014      | 443.24871       | 295.83490       | 7  |
| 8  | 1141.57896     | 571.29312       | 381.19784       | K-Acetyl | 729.38902      | 365.19815       | 243.80119       | 6  |
| 9  | 1242.62664     | 621.81696       | 414.88040       | T        | 559.28348      | 280.14538       | 187.09934       | 5  |
| 10 | 1339.67941     | 670.34334       | 447.23132       | P        | 458.23580      | 229.62154       | 153.41678       | 4  |
| 11 | 1468.72201     | 734.86464       | 490.24552       | E        | 361.18303      | 181.09515       | 121.06586       | 3  |
| 12 | 1525.74348     | 763.37538       | 509.25268       | G        | 232.14043      | 116.57385       | 78.05166        | 2  |
| 13 |                |                 |                 | R        | 175.11896      | 88.06312        | 59.04450        | 1  |

Extracted from: Z:\712AB\SK17-S (Ac)\Chichi-Abaumannii-SK17-R-Acetyl\_DrWu\_20140512.raw #15219 RT: 43.68  
 ITMS, CID@35.00, z=+3, Mono m/z=567.28583 Da, MH+=1699.84293 Da, Match Tol.=0.6 Da

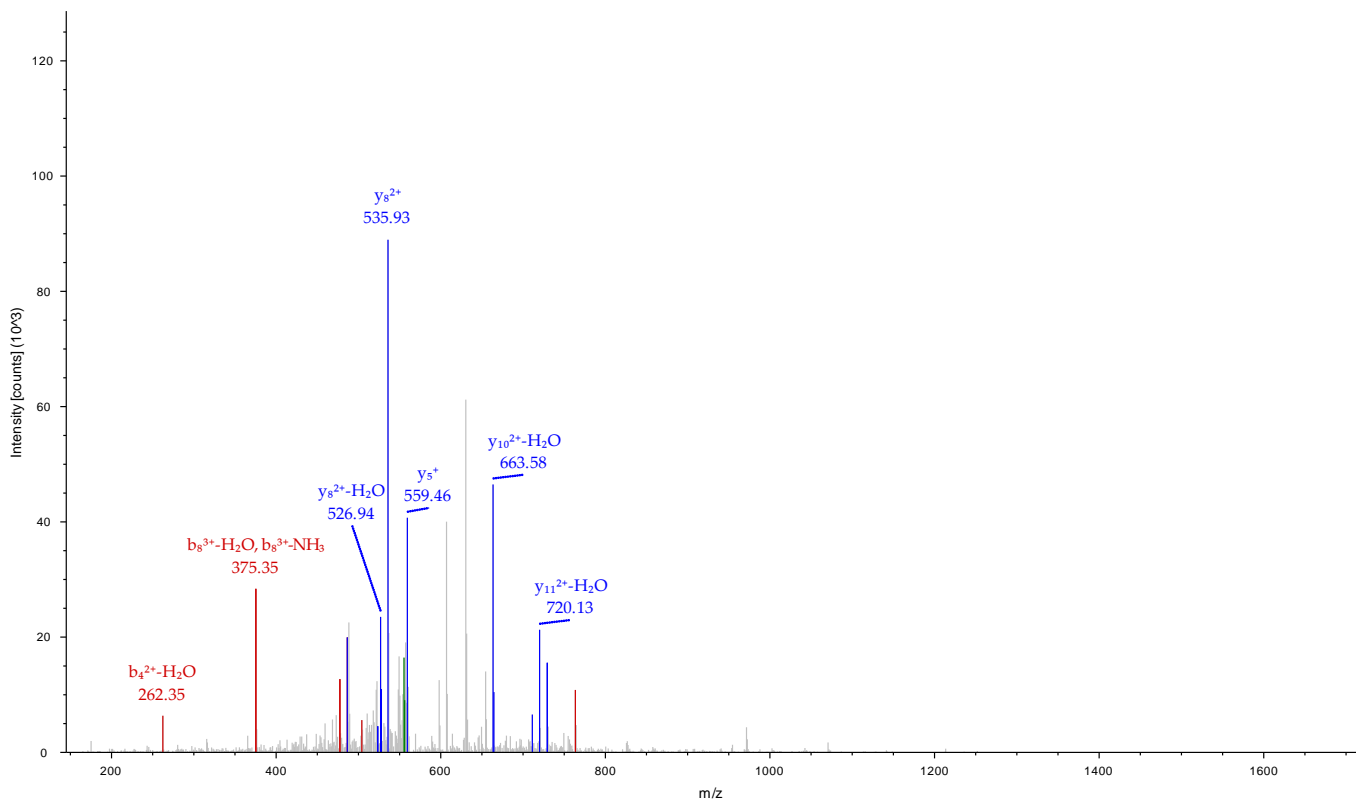

# peg.2807 26169

| #1 | b <sup>+</sup> | b <sup>2+</sup> | b <sup>3+</sup> | Seq.        | y <sup>+</sup> | y <sup>2+</sup> | y <sup>3+</sup> | #2 |
|----|----------------|-----------------|-----------------|-------------|----------------|-----------------|-----------------|----|
| 1  | 129.06586      | 65.03657        | 43.69347        | Q           |                |                 |                 | 21 |
| 2  | 258.10846      | 129.55787       | 86.70767        | E           | 2211.08976     | 1106.04852      | 737.70144       | 20 |
| 3  | 371.19253      | 186.09990       | 124.40236       | L           | 2082.04716     | 1041.52722      | 694.68724       | 19 |
| 4  | 486.21948      | 243.61338       | 162.74468       | D           | 1968.96309     | 984.98518       | 656.99255       | 18 |
| 5  | 599.30355      | 300.15541       | 200.43937       | I           | 1853.93614     | 927.47171       | 618.65023       | 17 |
| 6  | 728.34615      | 364.67671       | 243.45357       | E           | 1740.85207     | 870.92967       | 580.95554       | 16 |
| 7  | 898.45168      | 449.72948       | 300.15541       | K-Acetyl    | 1611.80947     | 806.40837       | 537.94134       | 15 |
| 8  | 1001.46087     | 501.23407       | 334.49181       | C           | 1441.70394     | 721.35561       | 481.23950       | 14 |
| 9  | 1058.48234     | 529.74481       | 353.49896       | G           | 1338.69475     | 669.85101       | 446.90310       | 13 |
| 10 | 1157.55076     | 579.27902       | 386.52177       | V           | 1281.67328     | 641.34028       | 427.89594       | 12 |
| 11 | 1244.58279     | 622.79503       | 415.53245       | S           | 1182.60486     | 591.80607       | 394.87314       | 11 |
| 12 | 1331.61482     | 666.31105       | 444.54312       | S           | 1095.57283     | 548.29005       | 365.86246       | 10 |
| 13 | 1444.69889     | 722.85308       | 482.23781       | L           | 1008.54080     | 504.77404       | 336.85178       | 9  |
| 14 | 1604.72955     | 802.86841       | 535.58137       | C-Carbam... | 895.45673      | 448.23200       | 299.15709       | 8  |
| 15 | 1703.79797     | 852.40262       | 568.60417       | V           | 735.42607      | 368.21667       | 245.81354       | 7  |
| 16 | 1840.85688     | 920.93208       | 614.29048       | H           | 636.35765      | 318.68246       | 212.79073       | 6  |
| 17 | 1937.90965     | 969.45846       | 646.64140       | P           | 499.29874      | 250.15301       | 167.10443       | 5  |
| 18 | 1994.93112     | 997.96920       | 665.64856       | G           | 402.24597      | 201.62662       | 134.75351       | 4  |
| 19 | 2051.95259     | 1026.47993      | 684.65571       | G           | 345.22450      | 173.11589       | 115.74635       | 3  |
| 20 | 2165.03666     | 1083.02197      | 722.35040       | I           | 288.20303      | 144.60515       | 96.73919        | 2  |
| 21 |                |                 |                 | R           | 175.11896      | 88.06312        | 59.04450        | 1  |

Extracted from: Z:\712AB\SK17-S (Ac)Chichi-Abaumannii-SK17-R-Acetyl\_DrWu\_20140703.raw #26169 RT: 71.64  
 ITMS, CID@35.00, z=+3, Mono m/z=780.38586 Da, MH+=2339.14304 Da, Match Tol.=0.6 Da

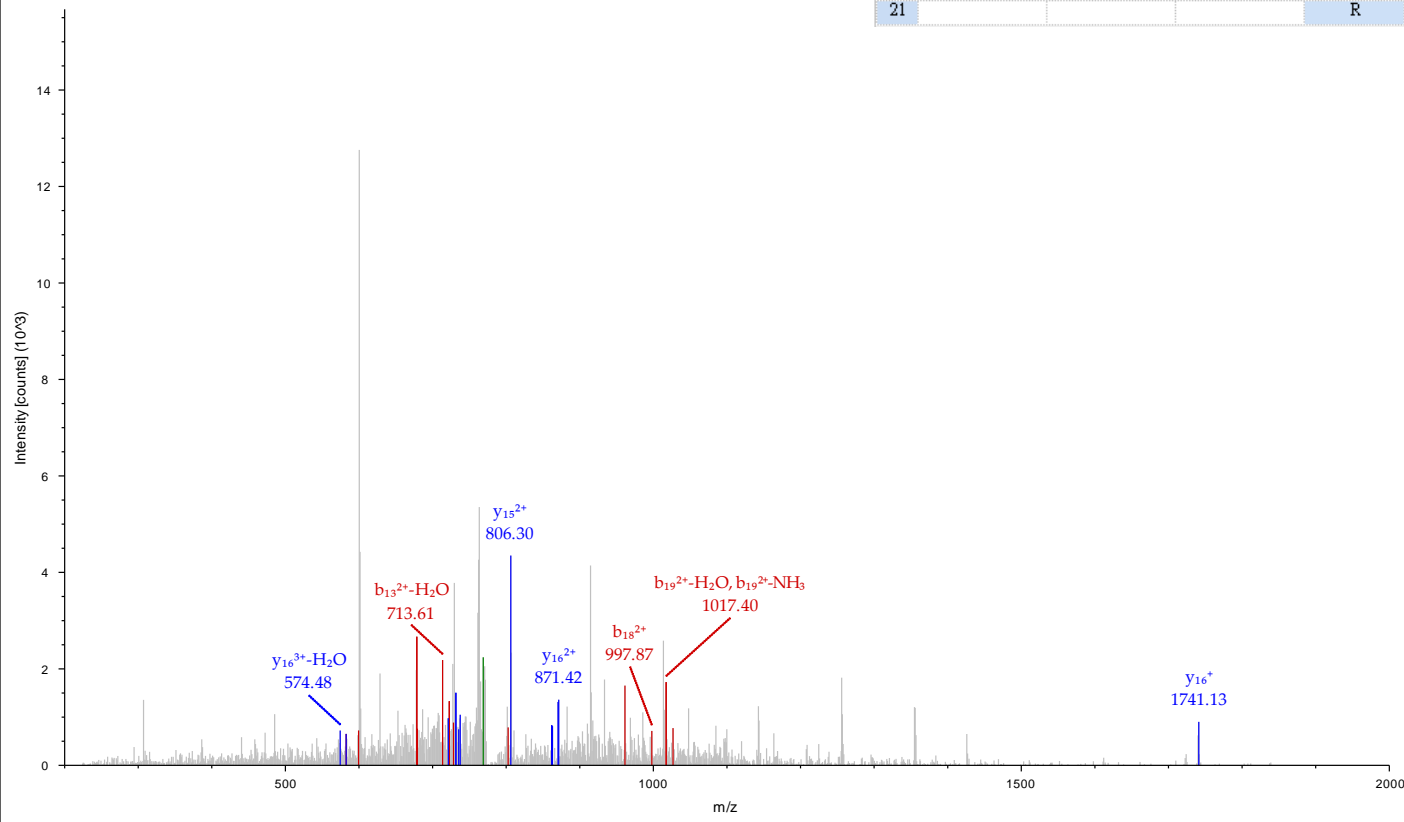

peg.2836 16373

| #1 | b <sup>+</sup> | b <sup>2+</sup> | Seq.     | y <sup>+</sup> | y <sup>2+</sup> | #2 |
|----|----------------|-----------------|----------|----------------|-----------------|----|
| 1  | 148.07570      | 74.54149        | F        |                |                 | 11 |
| 2  | 279.11620      | 140.06174       | M        | 1217.61951     | 609.31339       | 10 |
| 3  | 376.16897      | 188.58812       | P        | 1086.57901     | 543.79314       | 9  |
| 4  | 447.20609      | 224.10668       | A        | 989.52624      | 495.26676       | 8  |
| 5  | 617.31162      | 309.15945       | K-Acetyl | 918.48912      | 459.74820       | 7  |
| 6  | 718.35930      | 359.68329       | T        | 748.38359      | 374.69543       | 6  |
| 7  | 888.46484      | 444.73606       | K-Acetyl | 647.33591      | 324.17159       | 5  |
| 8  | 1017.50744     | 509.25736       | E        | 477.23037      | 239.11882       | 4  |
| 9  | 1131.55037     | 566.27882       | N        | 348.18777      | 174.59752       | 3  |
| 10 | 1218.58240     | 609.79484       | S        | 234.14484      | 117.57606       | 2  |
| 11 |                |                 | K        | 147.11281      | 74.06004        | 1  |

Extracted from: Z:\712AB\SK17-S (Ac)\Chichi-Abaumannii-SK17-R-Acetyl\_DrWu\_20140512.raw #16373 RT: 46.57  
ITMS, CID@35.00, z=+2, Mono m/z=682.84546 Da, MH+=1364.68364 Da, Match Tol.=0.6 Da

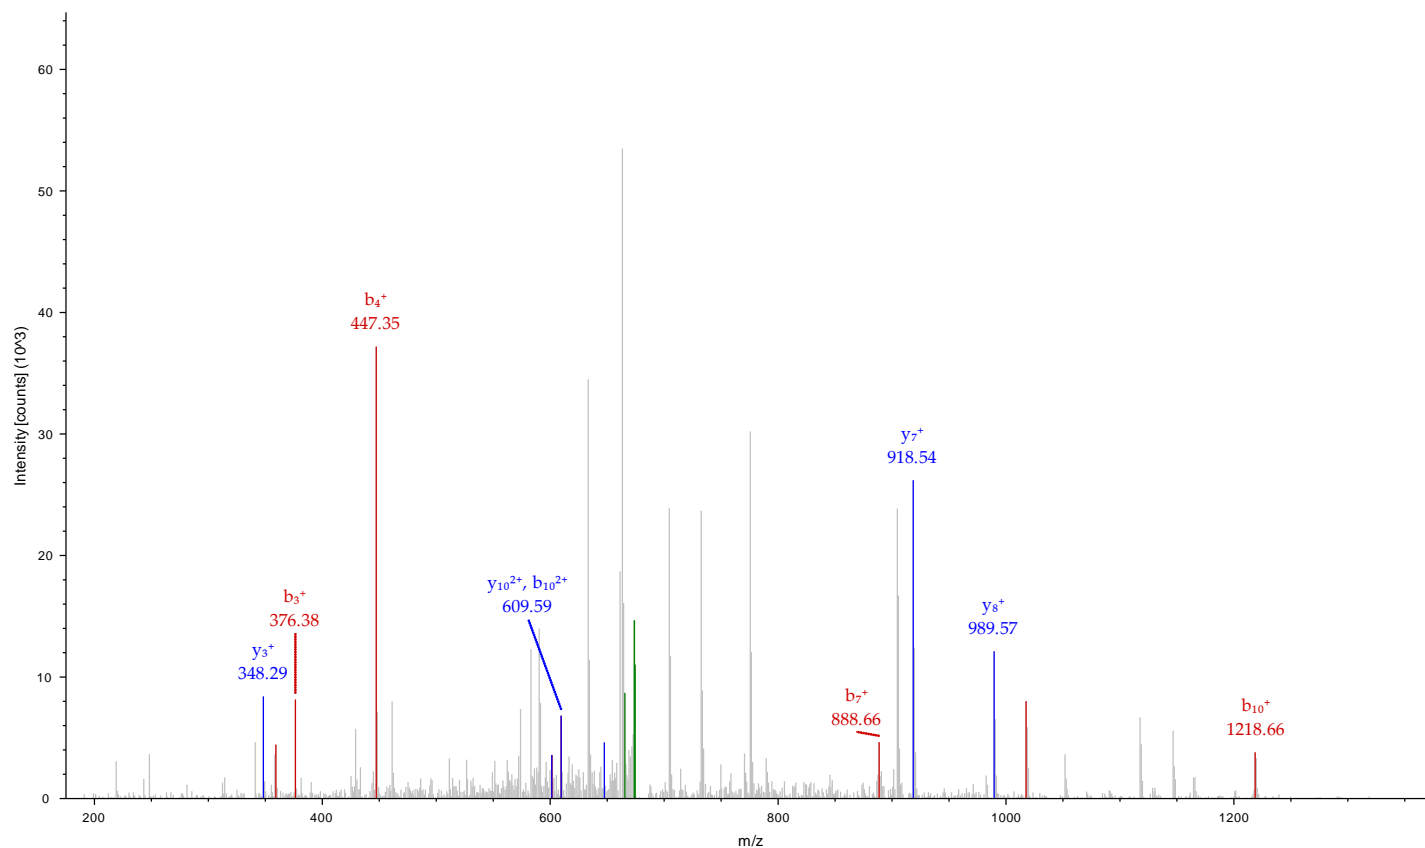

peg.2836 14570

| #1 | b <sup>+</sup> | b <sup>2+</sup> | Seq.     | y <sup>+</sup> | y <sup>2+</sup> | #2 |
|----|----------------|-----------------|----------|----------------|-----------------|----|
| 1  | 148.07570      | 74.54149        | F        |                |                 | 11 |
| 2  | 279.11620      | 140.06174       | M        | 1217.61951     | 609.31339       | 10 |
| 3  | 376.16897      | 188.58812       | P        | 1086.57901     | 543.79314       | 9  |
| 4  | 447.20609      | 224.10668       | A        | 989.52624      | 495.26676       | 8  |
| 5  | 617.31162      | 309.15945       | K-Acetyl | 918.48912      | 459.74820       | 7  |
| 6  | 718.35930      | 359.68329       | T        | 748.38359      | 374.69543       | 6  |
| 7  | 888.46484      | 444.73606       | K-Acetyl | 647.33591      | 324.17159       | 5  |
| 8  | 1017.50744     | 509.25736       | E        | 477.23037      | 239.11882       | 4  |
| 9  | 1131.55037     | 566.27882       | N        | 348.18777      | 174.59752       | 3  |
| 10 | 1218.58240     | 609.79484       | S        | 234.14484      | 117.57606       | 2  |
| 11 |                |                 | K        | 147.11281      | 74.06004        | 1  |

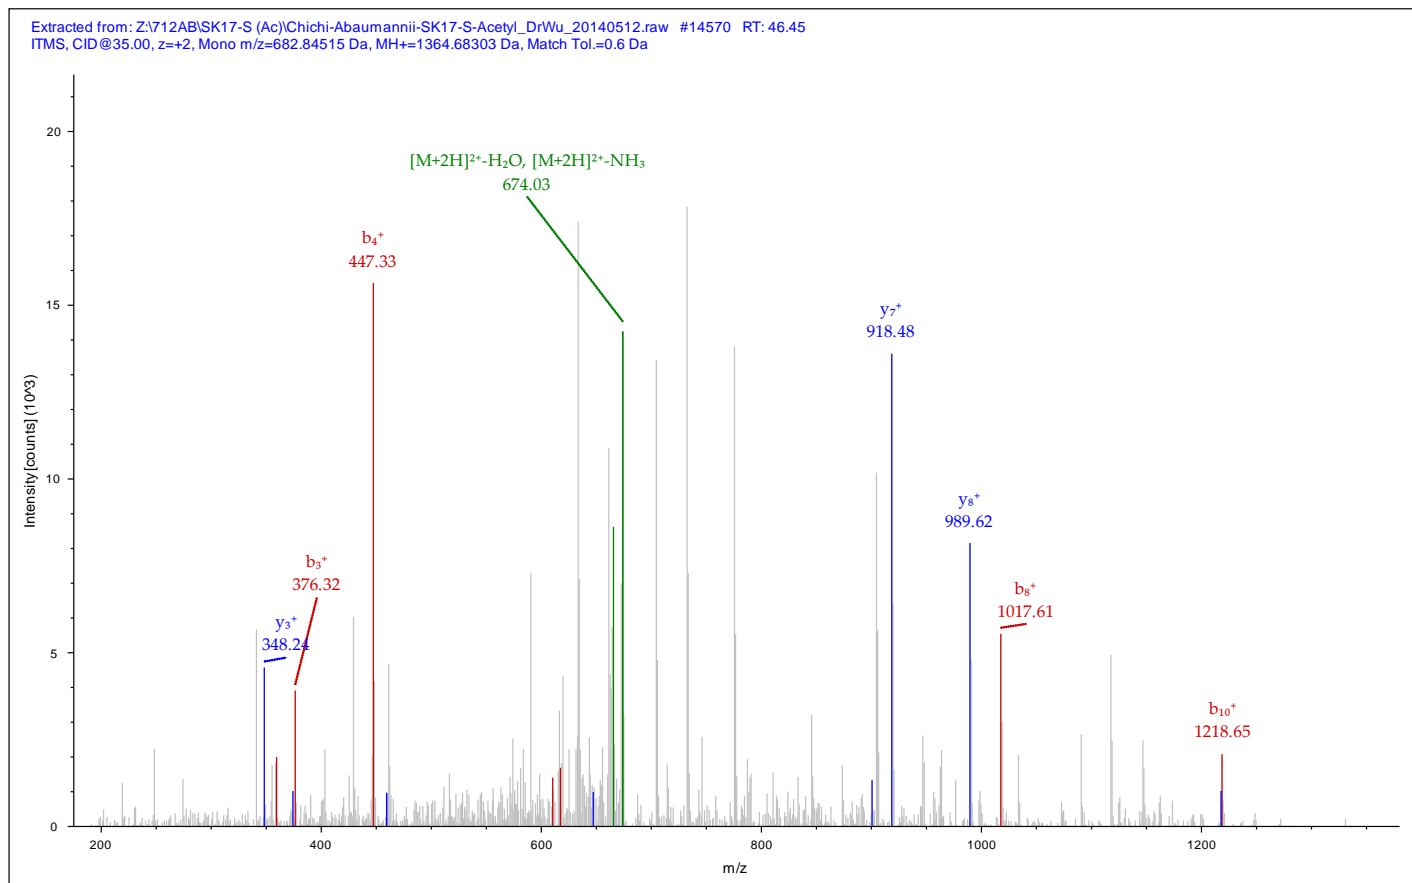

# peg.2836 9875

Extracted from: Z:\712AB\SK17-S (Ac)\Chichi-Abaumannii-SK17-S-Acetyl\_DrWu\_20140512.raw #9875 RT: 34.62  
 ITMS, CID@35.00, z=+3, Mono m/z=1032.45630 Da, MH+=3095.35434 Da, Match Tol.=0.6 Da

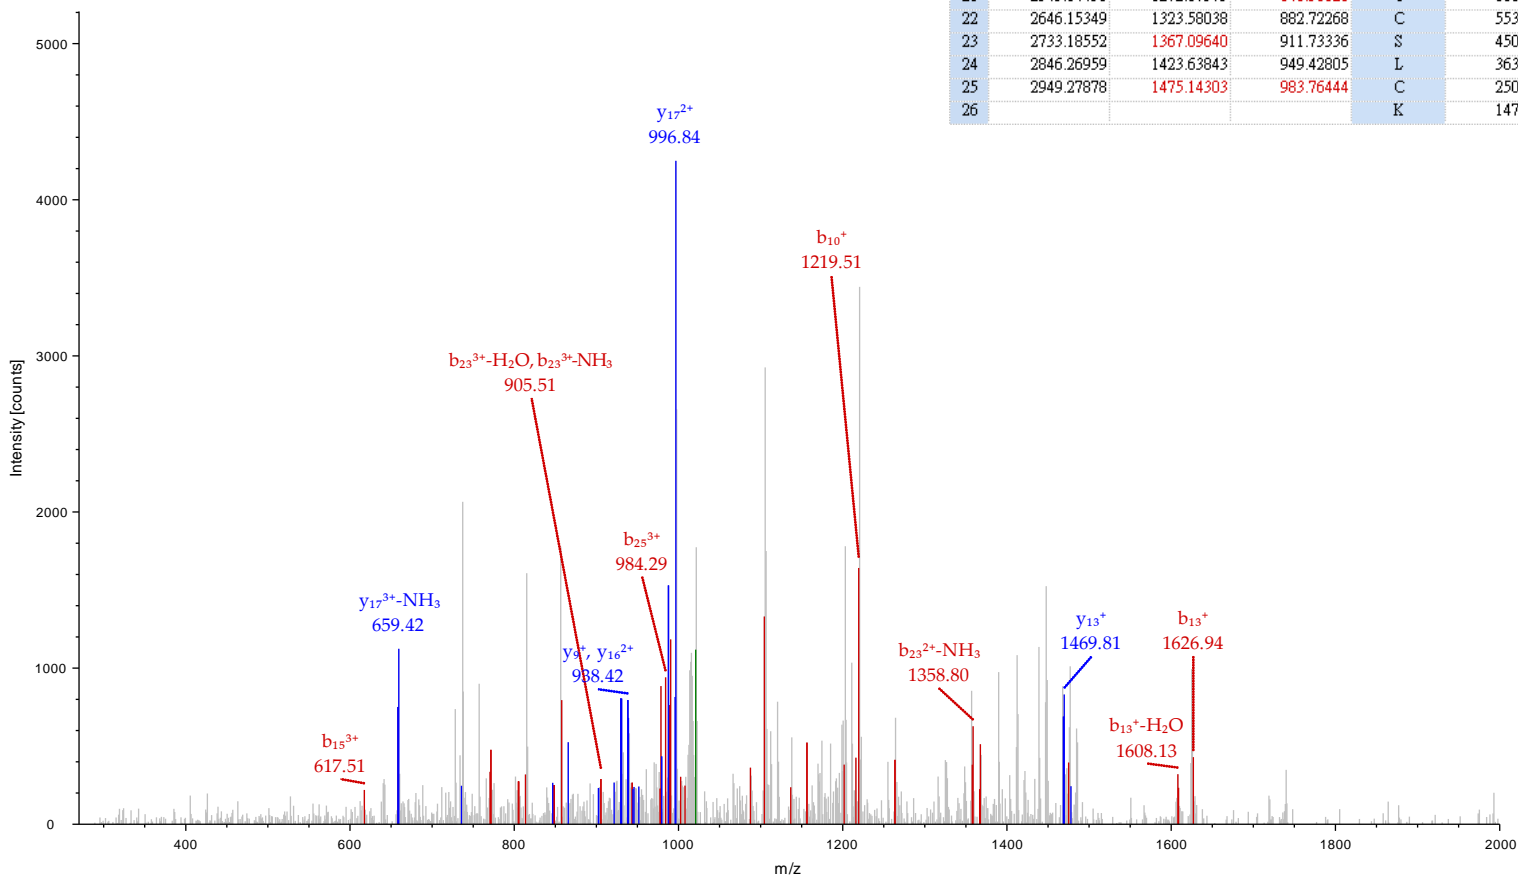

| #1 | b <sup>+</sup> | b <sup>2+</sup> | b <sup>3+</sup> | Seq.        | y <sup>+</sup> | y <sup>2+</sup> | y <sup>3+</sup> | #2 |
|----|----------------|-----------------|-----------------|-------------|----------------|-----------------|-----------------|----|
| 1  | 142.08626      | 71.54677        | 48.03360        | V-Acetyl    |                |                 |                 | 26 |
| 2  | 245.09545      | 123.05136       | 82.37000        | C           | 2954.30533     | 1477.65630      | 985.43996       | 25 |
| 3  | 374.13805      | 187.57266       | 125.38420       | E           | 2851.29614     | 1426.15171      | 951.10356       | 24 |
| 4  | 502.19663      | 251.60195       | 168.07039       | Q           | 2722.25354     | 1361.63041      | 908.08936       | 23 |
| 5  | 559.21810      | 280.11269       | 187.07755       | G           | 2594.19496     | 1297.60112      | 865.40317       | 22 |
| 6  | 722.28142      | 361.64435       | 241.43199       | Y           | 2537.17349     | 1269.09038      | 846.39601       | 21 |
| 7  | 851.32402      | 426.16565       | 284.44619       | E           | 2374.11017     | 1187.55872      | 792.04157       | 20 |
| 8  | 1007.42514     | 504.21621       | 336.47990       | R           | 2245.06757     | 1123.03742      | 749.02737       | 19 |
| 9  | 1104.47791     | 552.74259       | 368.83082       | P           | 2088.96645     | 1044.98686      | 696.99367       | 18 |
| 10 | 1219.50486     | 610.25607       | 407.17314       | D           | 1991.91368     | 996.46048       | 664.64274       | 17 |
| 11 | 1332.58893     | 666.79810       | 444.86783       | I           | 1876.88673     | 938.94700       | 626.30043       | 16 |
| 12 | 1479.62435     | 740.31581       | 493.87963       | M-Oxidation | 1763.80266     | 882.40497       | 588.60574       | 15 |
| 13 | 1626.69277     | 813.85002       | 542.90244       | F           | 1616.76725     | 808.88726       | 539.59393       | 14 |
| 14 | 1713.72480     | 857.36604       | 571.91312       | S           | 1469.69883     | 735.35305       | 490.57113       | 13 |
| 15 | 1850.78371     | 925.89549       | 617.59942       | H           | 1382.66680     | 691.83704       | 461.56045       | 12 |
| 16 | 2020.88924     | 1010.94826      | 674.30126       | K-Acetyl    | 1245.60789     | 623.30758       | 415.87415       | 11 |
| 17 | 2157.94815     | 1079.47771      | 719.98757       | H           | 1075.50235     | 538.25481       | 359.17230       | 10 |
| 18 | 2271.99108     | 1136.49918      | 758.00188       | N           | 938.44344      | 469.72536       | 313.48600       | 9  |
| 19 | 2329.01255     | 1165.00991      | 777.00903       | G           | 824.40051      | 412.70389       | 275.47169       | 8  |
| 20 | 2430.06023     | 1215.53375      | 810.69159       | T           | 767.37904      | 384.19316       | 256.46453       | 7  |
| 21 | 2543.14430     | 1272.07579      | 848.38628       | I           | 666.33136      | 333.66932       | 222.78197       | 6  |
| 22 | 2646.15349     | 1323.58038      | 882.72268       | C           | 553.24729      | 277.12728       | 185.08728       | 5  |
| 23 | 2733.18552     | 1367.09640      | 911.73336       | S           | 450.23810      | 225.62269       | 150.75088       | 4  |
| 24 | 2846.26959     | 1423.63843      | 949.42805       | L           | 363.20607      | 182.10667       | 121.74021       | 3  |
| 25 | 2949.27878     | 1475.14303      | 983.76444       | C           | 250.12200      | 125.56464       | 84.04552        | 2  |
| 26 |                |                 |                 | K           | 147.11281      | 74.06004        | 49.70912        | 1  |



peg.2845 17815

| #1 | b <sup>+</sup>    | b <sup>2+</sup>  | Seq.        | y <sup>+</sup>             | y <sup>2+</sup> | #2 |
|----|-------------------|------------------|-------------|----------------------------|-----------------|----|
| 1  | 146.02703         | 73.51715         | C-Acetyl    |                            |                 | 15 |
| 2  | 316.13257         | 158.56992        | K-Acetyl    | 1645.87652                 | 823.44190       | 14 |
| 3  | 429.21664         | 215.11196        | L           | 1475.77098                 | 738.38913       | 13 |
| 4  | 576.25205         | 288.62966        | M-Oxidation | <a href="#">1362.68691</a> | 681.84709       | 12 |
| 5  | 677.29973         | 339.15350        | T           | 1215.65150                 | 608.32939       | 11 |
| 6  | 748.33685         | 374.67206        | A           | 1114.60382                 | 557.80555       | 10 |
| 7  | 805.35832         | 403.18280        | G           | 1043.56670                 | 522.28699       | 9  |
| 8  | <b>975.46386</b>  | 488.23557        | K-Acetyl    | 986.54523                  | 493.77625       | 8  |
| 9  | 1074.53228        | 537.76978        | V           | 816.43969                  | 408.72348       | 7  |
| 10 | 1131.55375        | 566.28051        | G           | 717.37127                  | 359.18927       | 6  |
| 11 | <b>1262.59425</b> | 631.80076        | M           | 660.34980                  | 330.67854       | 5  |
| 12 | 1391.63685        | 696.32206        | E           | <a href="#">529.30930</a>  | 265.15829       | 4  |
| 13 | 1547.73797        | 774.37262        | R           | 400.26670                  | 200.63699       | 3  |
| 14 | 1644.79074        | <b>822.89901</b> | P           | 244.16558                  | 122.58643       | 2  |
| 15 |                   |                  | K           | 147.11281                  | 74.06004        | 1  |

Extracted from: Z:\712AB\SK17-S (Ac)Chichi-Abaumannii-SK17-R-Acetyl\_DrWu\_20140703.raw #17815 RT:50.70  
 ITMS, CID@35.00, z=+2, Mono m/z=895.95483 Da, MH+=1790.90239 Da, Match Tol.=0.6 Da

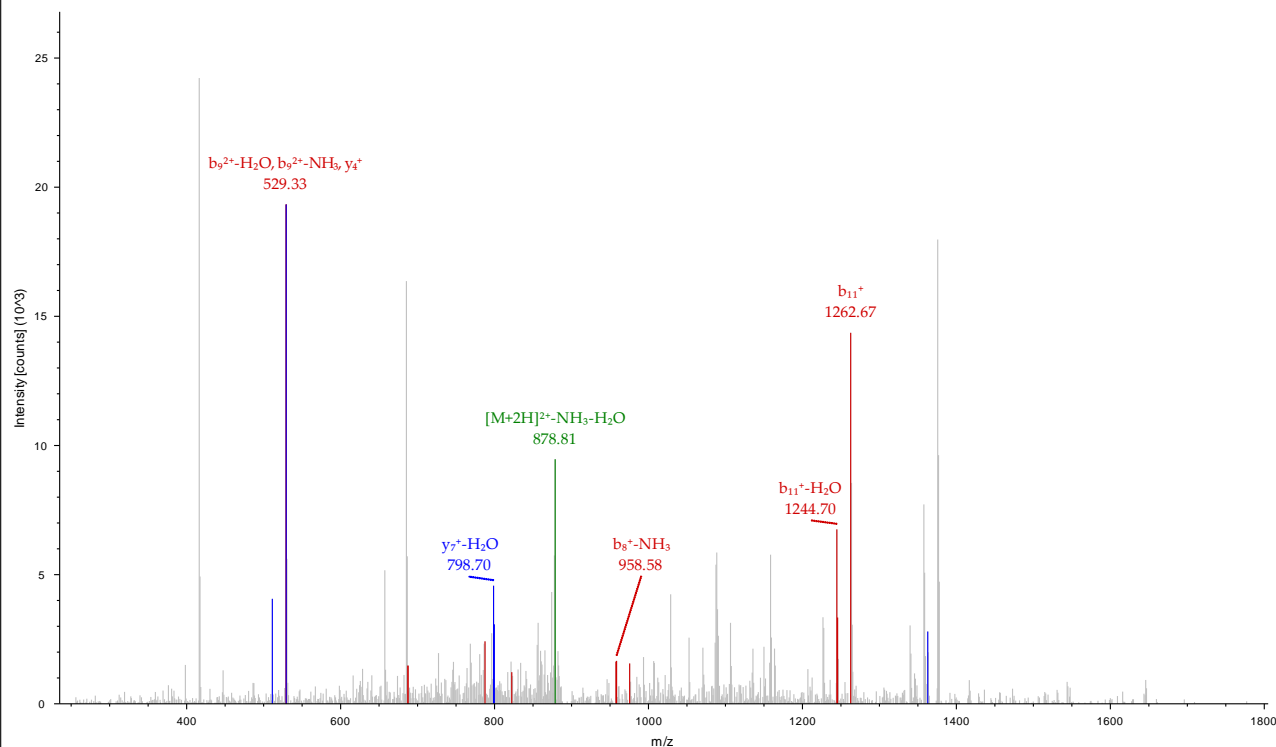

peg.2851 17524

| #1 | b <sup>+</sup> | b <sup>2+</sup> | Seq.        | y <sup>+</sup> | y <sup>2+</sup> | #2 |
|----|----------------|-----------------|-------------|----------------|-----------------|----|
| 1  | 146.02703      | 73.51715        | C-Acetyl    |                |                 | 15 |
| 2  | 316.13257      | 158.56992       | K-Acetyl    | 1645.87652     | 823.44190       | 14 |
| 3  | 429.21664      | 215.11196       | L           | 1475.77098     | 738.38913       | 13 |
| 4  | 576.25205      | 288.62966       | M-Oxidation | 1362.68691     | 681.84709       | 12 |
| 5  | 677.29973      | 339.15350       | T           | 1215.65150     | 608.32939       | 11 |
| 6  | 748.33685      | 374.67206       | A           | 1114.60382     | 557.80555       | 10 |
| 7  | 805.35832      | 403.18280       | G           | 1043.56670     | 522.28699       | 9  |
| 8  | 975.46386      | 488.23557       | K-Acetyl    | 986.54523      | 493.77625       | 8  |
| 9  | 1074.53228     | 537.76978       | V           | 816.43969      | 408.72348       | 7  |
| 10 | 1131.55375     | 566.28051       | G           | 717.37127      | 359.18927       | 6  |
| 11 | 1262.59425     | 631.80076       | M           | 660.34980      | 330.67854       | 5  |
| 12 | 1391.63685     | 696.32206       | E           | 529.30930      | 265.15829       | 4  |
| 13 | 1547.73797     | 774.37262       | R           | 400.26670      | 200.63699       | 3  |
| 14 | 1644.79074     | 822.89901       | P           | 244.16558      | 122.58643       | 2  |
| 15 |                |                 | K           | 147.11281      | 74.06004        | 1  |

Extracted from: Z:\712AB\SK17-S (Ac)\Chichi-Abaumannii-SK17-R-Acetyl\_DrWu\_20140703.raw #17815 RT: 50.70  
 TMS, CID@35.00, z=+2, Mono m/z=895.95483 Da, MH+=1790.90239 Da, Match Tol.=0.6 Da

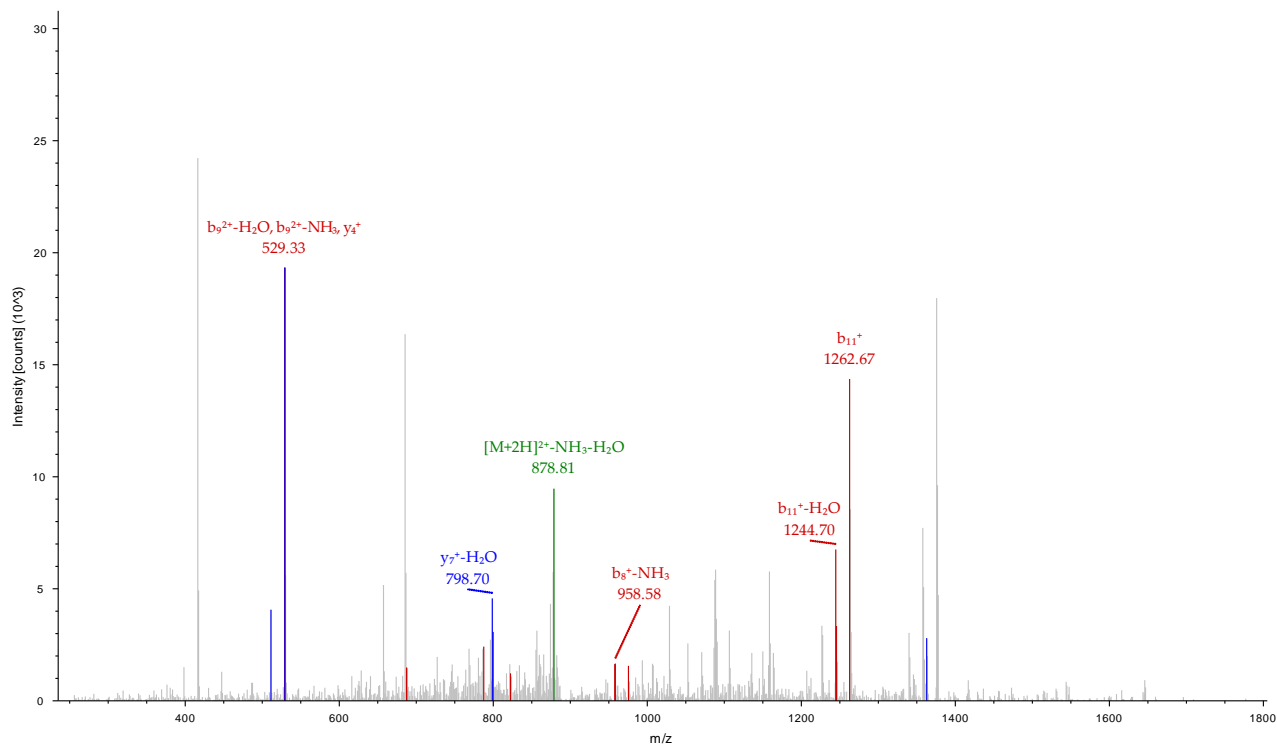

peg.2868 15652

| #1 | b <sup>+</sup> | b <sup>2+</sup> | Seq.     | y <sup>+</sup> | y <sup>2+</sup> | #2 |
|----|----------------|-----------------|----------|----------------|-----------------|----|
| 1  | 114.05496      | 57.53112        | A-Acetyl |                |                 | 7  |
| 2  | 284.16050      | 142.58389       | K-Acetyl | 770.52473      | 385.76600       | 6  |
| 3  | 397.24457      | 199.12592       | L        | 600.41919      | 300.71323       | 5  |
| 4  | 525.33954      | 263.17341       | K        | 487.33512      | 244.17120       | 4  |
| 5  | 596.37666      | 298.69197       | A        | 359.24015      | 180.12371       | 3  |
| 6  | 709.46073      | 355.23400       | L        | 288.20303      | 144.60515       | 2  |
| 7  |                |                 | R        | 175.11896      | 88.06312        | 1  |

Extracted from: Z:\712AB\SK17-S (Ac)\Chichi-Abaumannii-SK17-R-Acetyl\_DrWu\_20140512.raw #15652 RT: 44.76  
 ITMS, CID@35.00, z=+2, Mono m/z=442.28958 Da, MH+=883.57189 Da, Match Tol.=0.6 Da

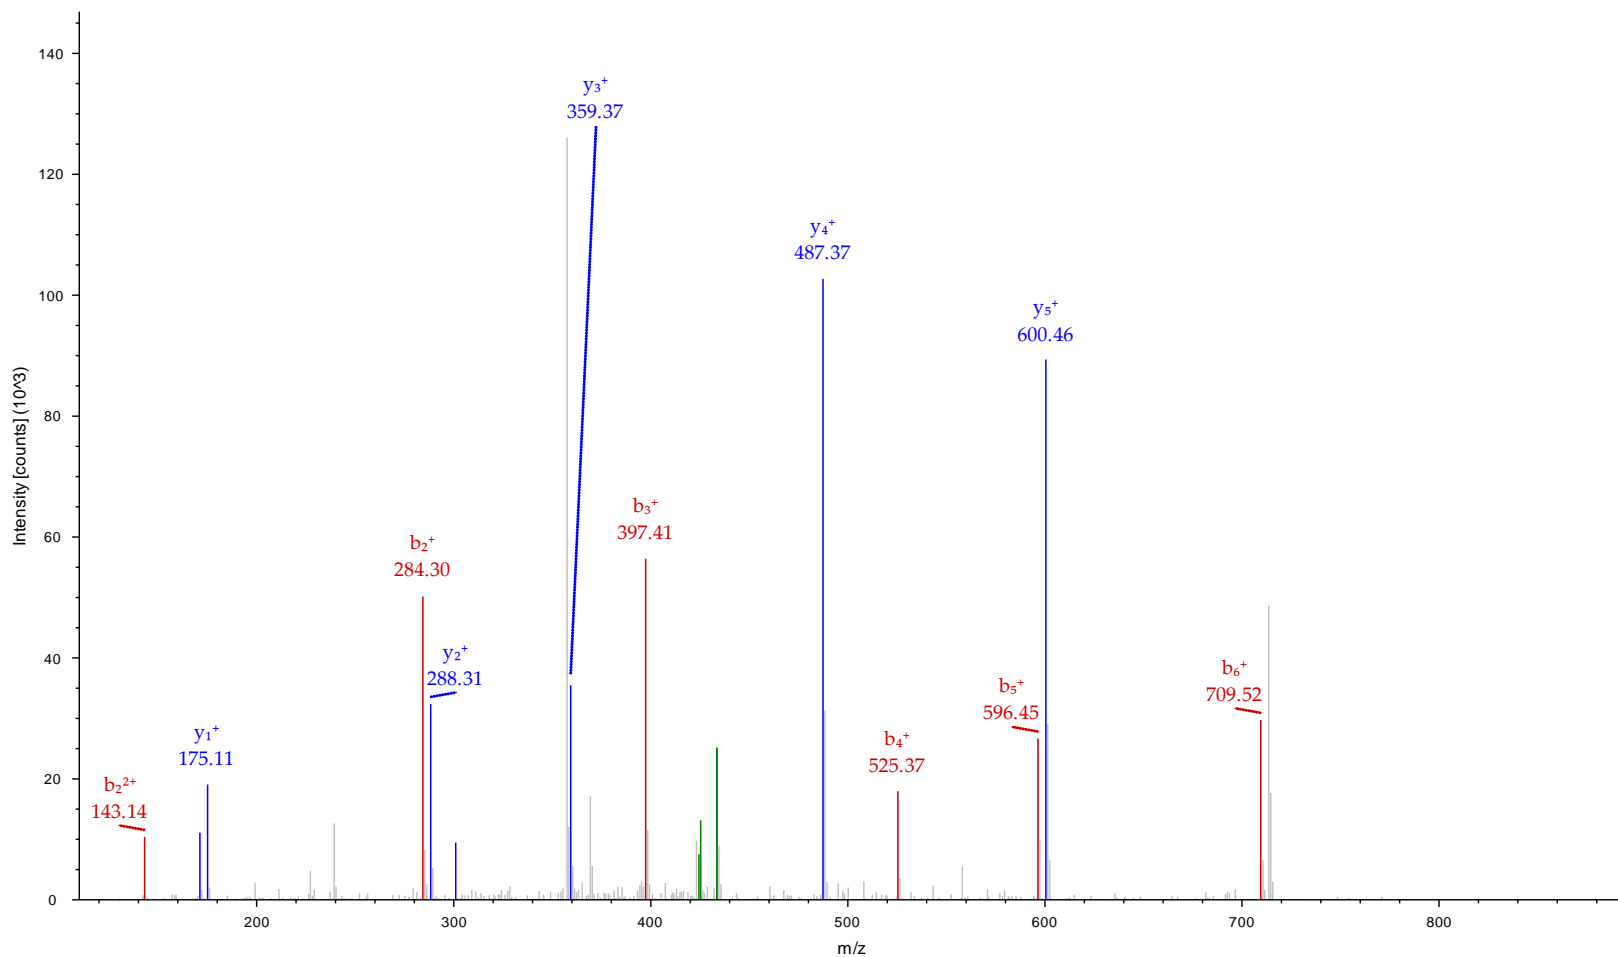

peg.2868 13921

| #1 | b <sup>+</sup> | b <sup>2+</sup> | Seq.     | y <sup>+</sup> | y <sup>2+</sup> | #2 |
|----|----------------|-----------------|----------|----------------|-----------------|----|
| 1  | 114.05496      | 57.53112        | A-Acetyl |                |                 | 7  |
| 2  | 284.16050      | 142.58389       | K-Acetyl | 770.52473      | 385.76600       | 6  |
| 3  | 397.24457      | 199.12592       | L        | 600.41919      | 300.71323       | 5  |
| 4  | 525.33954      | 263.17341       | K        | 487.33512      | 244.17120       | 4  |
| 5  | 596.37666      | 298.69197       | A        | 359.24015      | 180.12371       | 3  |
| 6  | 709.46073      | 355.23400       | L        | 288.20303      | 144.60515       | 2  |
| 7  |                |                 | R        | 175.11896      | 88.06312        | 1  |

Extracted from: Z:\712AB\SK17-S (Ac)Chichi-Abaumannii-SK17-S-Acetyl\_DrWu\_20140512.raw #13921 RT: 44.79  
 ITMS, CID@35.00, z=+2, Mono m/z=442.28918 Da, MH+=883.57109 Da, Match Tol.=0.6 Da

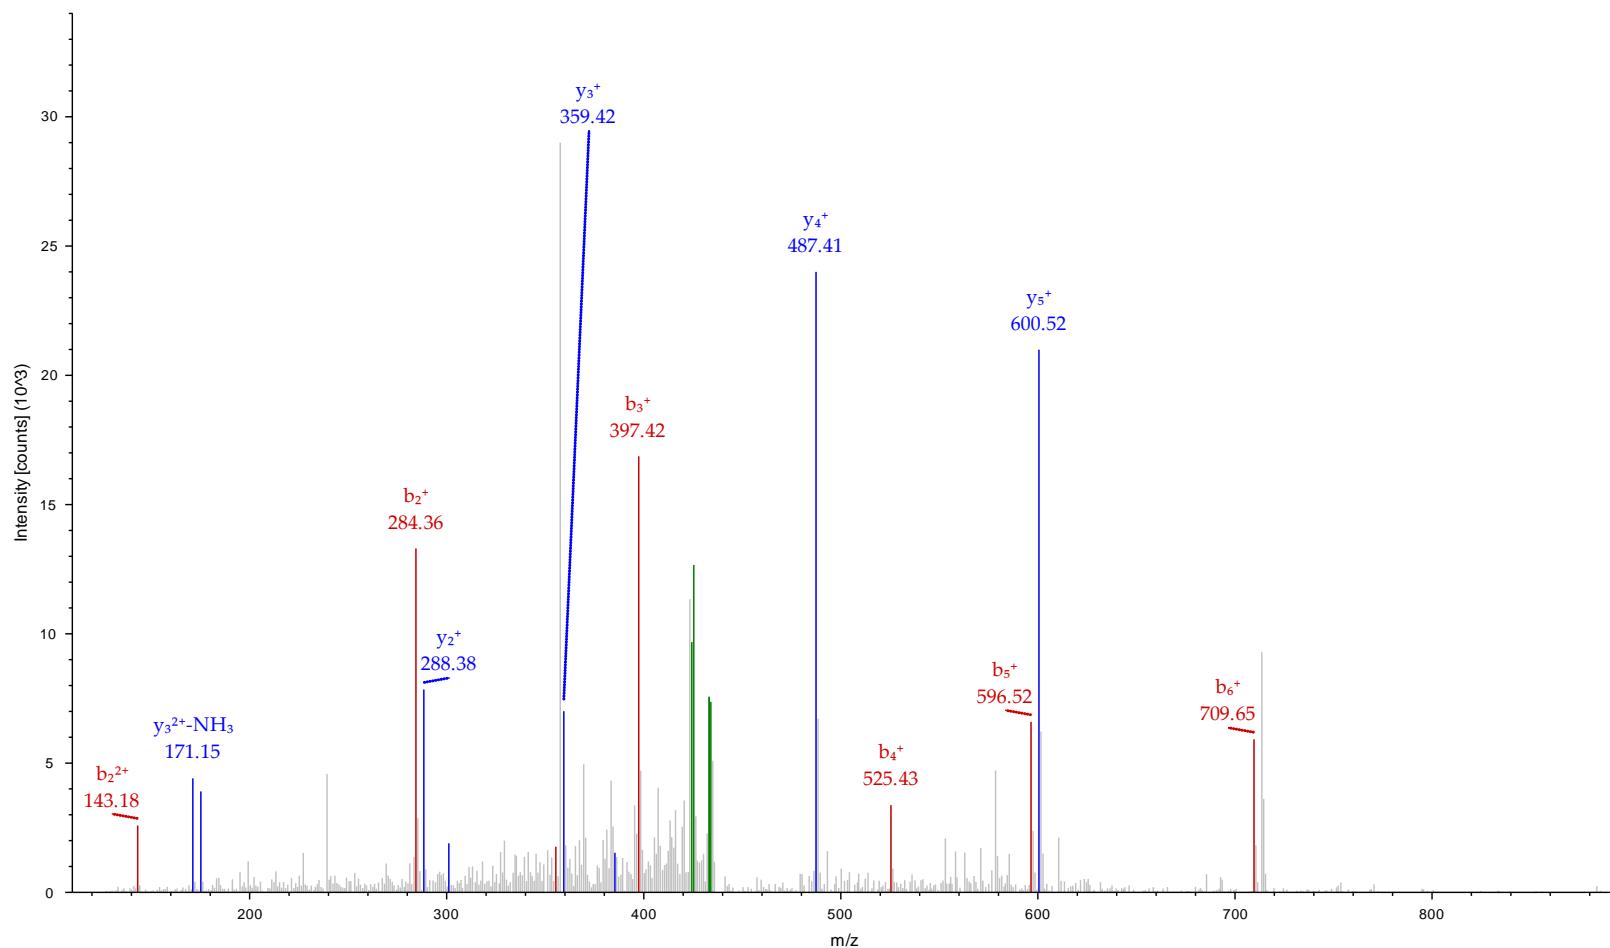

peg.2897 9754

| #1 | b <sup>+</sup> | b <sup>2+</sup> | b <sup>3+</sup> | Seq.     | y <sup>+</sup> | y <sup>2+</sup> | y <sup>3+</sup> | #2 |
|----|----------------|-----------------|-----------------|----------|----------------|-----------------|-----------------|----|
| 1  | 132.04778      | 66.52753        | 44.68744        | M        |                |                 |                 | 10 |
| 2  | 245.13185      | 123.06956       | 82.38213        | L        | 1096.68376     | 548.84552       | 366.23277       | 9  |
| 3  | 373.19043      | 187.09885       | 125.06833       | Q        | 983.59969      | 492.30348       | 328.53808       | 8  |
| 4  | 543.29596      | 272.15162       | 181.77017       | K-Acetyl | 855.54111      | 428.27419       | 285.85189       | 7  |
| 5  | 642.36438      | 321.68583       | 214.79298       | V        | 685.43557      | 343.22142       | 229.15004       | 6  |
| 6  | 755.44845      | 378.22786       | 252.48767       | L        | 586.36715      | 293.68721       | 196.12723       | 5  |
| 7  | 868.53252      | 434.76990       | 290.18236       | I        | 473.28308      | 237.14518       | 158.43254       | 4  |
| 8  | 939.56964      | 470.28846       | 313.86140       | A        | 360.19901      | 180.60314       | 120.73785       | 3  |
| 9  | 1053.61257     | 527.30992       | 351.87571       | N        | 289.16189      | 145.08458       | 97.05881        | 2  |
| 10 |                |                 |                 | R        | 175.11896      | 88.06312        | 59.04450        | 1  |

Extracted from: Z:\712AB\SK17-S (Ac)\Chichi-Abaumannii-SK17-R-Acetyl\_DrWu\_20140512.raw #9754 RT: 30.58  
 ITMS, CID@35.00, z=+3, Mono m/z=409.91479 Da, MH+=1227.72983 Da, Match Tol.=0.6 Da

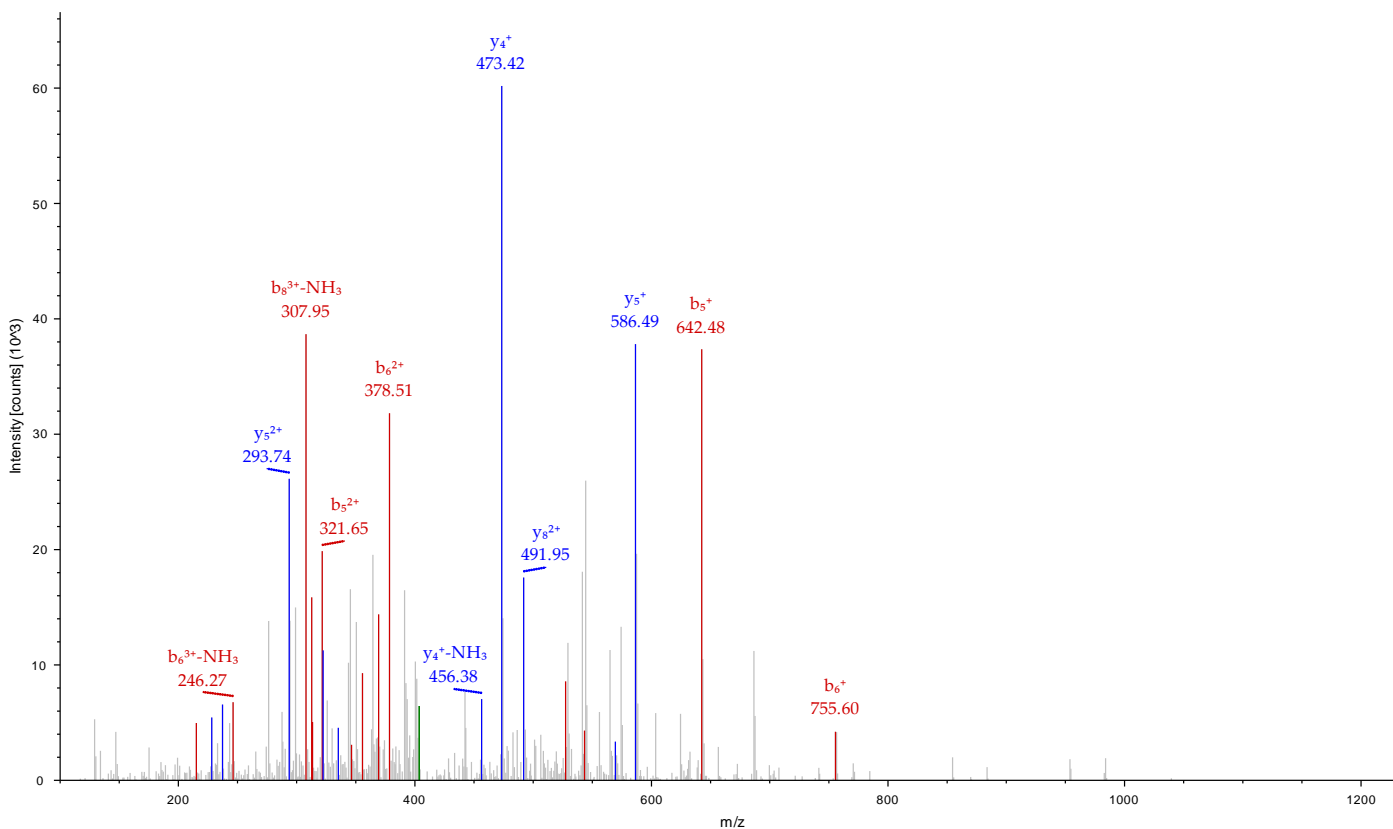

peg.2904 7656

| #1 | b <sup>+</sup> | b <sup>2+</sup> | Seq.     | y <sup>+</sup> | y <sup>2+</sup> | #2 |
|----|----------------|-----------------|----------|----------------|-----------------|----|
| 1  | 171.11281      | 86.06004        | K-Acetyl |                |                 | 7  |
| 2  | 242.14993      | 121.57860       | A        | 604.33010      | 302.66869       | 6  |
| 3  | 299.17140      | 150.08934       | G        | 533.29298      | 267.15013       | 5  |
| 4  | 412.25547      | 206.63137       | L        | 476.27151      | 238.63939       | 4  |
| 5  | 527.28242      | 264.14485       | X-D      | 363.18744      | 182.09736       | 3  |
| 6  | 628.33010      | 314.66869       | T        | 248.16049      | 124.58388       | 2  |
| 7  |                |                 | K        | 147.11281      | 74.06004        | 1  |

Extracted from: Z:\712AB\ISK17-S (Ac)\Chichi-Abaumannii-SK17-S-Acetyl\_DrWu\_20140512.raw #7656 RT: 29.20  
ITMS, CID@35.00, z=+2, Mono m/z=387.71817 Da, MH+=774.42906 Da, Match Tol.=0.6 Da

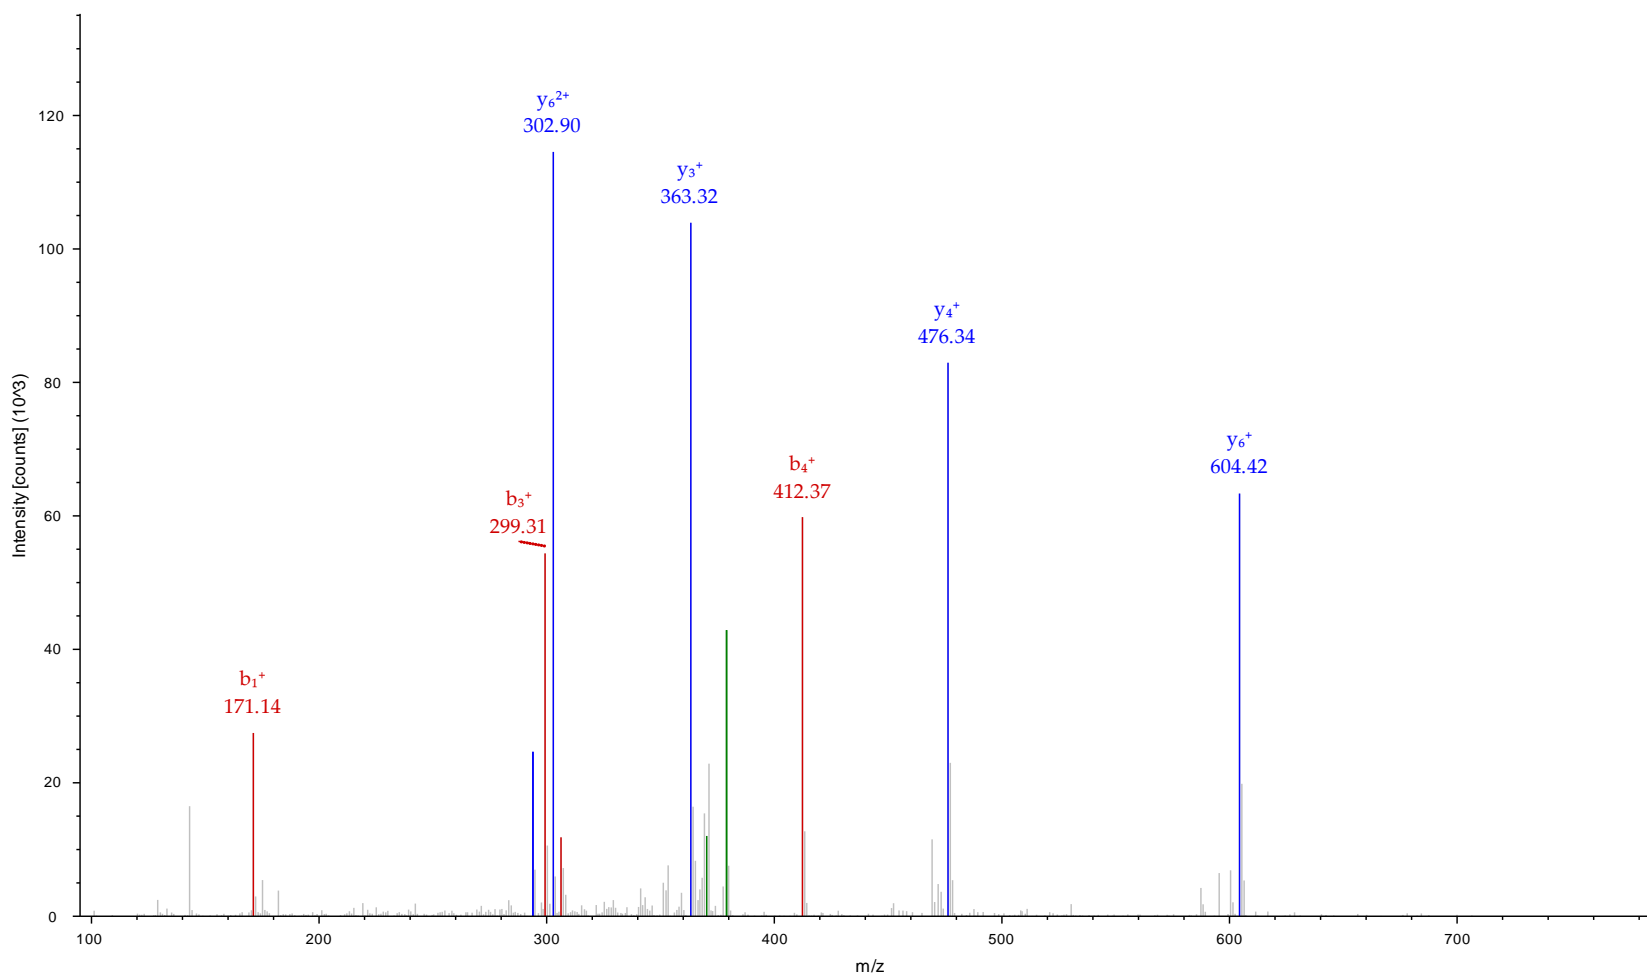

peg.2920 27586

| #1 | b <sup>+</sup> | b <sup>2+</sup> | Seq.     | y <sup>+</sup> | y <sup>2+</sup> | #2 |
|----|----------------|-----------------|----------|----------------|-----------------|----|
| 1  | 174.05834      | 87.53281        | M-Acetyl |                |                 | 19 |
| 2  | 231.07981      | 116.04354       | G        | 1990.02410     | 995.51569       | 18 |
| 3  | 378.14823      | 189.57775       | F        | 1933.00263     | 967.00495       | 17 |
| 4  | 492.19116      | 246.59922       | N        | 1785.93421     | 893.47074       | 16 |
| 5  | 606.23409      | 303.62068       | N        | 1671.89128     | 836.44928       | 15 |
| 6  | 721.26104      | 361.13416       | D        | 1557.84835     | 779.42781       | 14 |
| 7  | 778.28251      | 389.64489       | G        | 1442.82140     | 721.91434       | 13 |
| 8  | 877.35093      | 439.17910       | V        | 1385.79993     | 693.40360       | 12 |
| 9  | 992.37788      | 496.69258       | D        | 1286.73151     | 643.86939       | 11 |
| 10 | 1162.48342     | 581.74535       | K-Acetyl | 1171.70456     | 586.35592       | 10 |
| 11 | 1275.56749     | 638.28738       | L        | 1001.59902     | 501.30315       | 9  |
| 12 | 1388.65156     | 694.82942       | I        | 888.51495      | 444.76111       | 8  |
| 13 | 1517.69416     | 759.35072       | E        | 775.43088      | 388.21908       | 7  |
| 14 | 1631.73709     | 816.37218       | N        | 646.38828      | 323.69778       | 6  |
| 15 | 1730.80551     | 865.90639       | V        | 532.34535      | 266.67631       | 5  |
| 16 | 1858.90048     | 929.95388       | K        | 433.27693      | 217.14210       | 4  |
| 17 | 1929.93760     | 965.47244       | A        | 305.18196      | 153.09462       | 3  |
| 18 | 2016.96963     | 1008.98845      | S        | 234.14484      | 117.57606       | 2  |
| 19 |                |                 | K        | 147.11281      | 74.06004        | 1  |

Extracted from: Z:\712AB\SK17-S (Ac)\Chichi-Abaumannii-SK17-S-Acetyl\_DrWu\_20140512.raw #27586 RT: 83.59  
 ITMS, CID@35.00, z=+2, Mono m/z=1082.03137 Da, MH+=2163.05547 Da, Match Tol.=0.6 Da

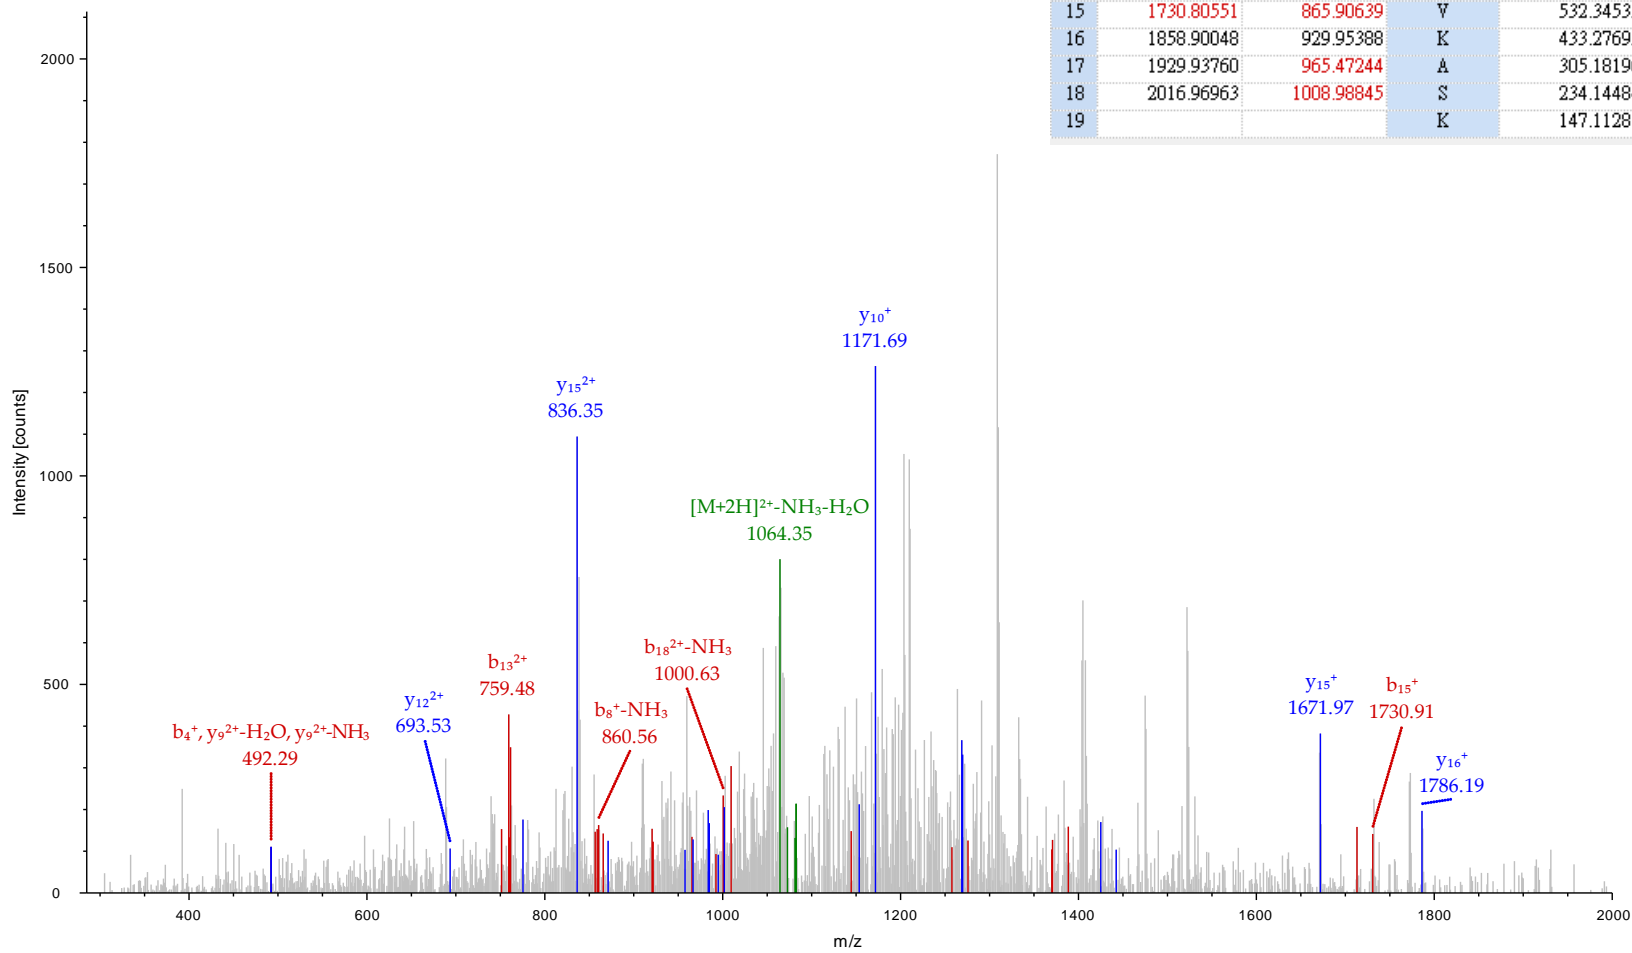

peg.2933 28735

| #1 | b <sup>+</sup> | b <sup>2+</sup> | Seq.     | y <sup>+</sup> | y <sup>2+</sup> | #2 |
|----|----------------|-----------------|----------|----------------|-----------------|----|
| 1  | 129.06586      | 65.03657        | Q        |                |                 | 12 |
| 2  | 228.13428      | 114.57078       | Y        | 1186.66784     | 593.83756       | 11 |
| 3  | 343.16123      | 172.08425       | D        | 1087.59942     | 544.30335       | 10 |
| 4  | 456.24530      | 228.62629       | L        | 972.57247      | 486.78987       | 9  |
| 5  | 527.28242      | 264.14485       | A        | 859.48840      | 430.24784       | 8  |
| 6  | 640.36649      | 320.68688       | L        | 788.45128      | 394.72928       | 7  |
| 7  | 711.40361      | 356.20544       | A        | 675.36721      | 338.18724       | 6  |
| 8  | 812.45129      | 406.72928       | T        | 604.33009      | 302.66868       | 5  |
| 9  | 869.47276      | 435.24002       | G        | 503.28241      | 252.14484       | 4  |
| 10 | 1039.57829     | 520.29278       | K-Acetyl | 446.26094      | 223.63411       | 3  |
| 11 | 1126.61032     | 563.80880       | S        | 276.15541      | 138.58134       | 2  |
| 12 |                |                 | K-Acetyl | 189.12338      | 95.06533        | 1  |

Extracted from: Z:\712AB\SK17-S (Ac)\Chichi-Abaumannii-SK17-R-Acetyl\_DrWu\_20140703.raw #28735 RT: 78.99  
 ITMS, CID@35.00, z=+2, Mono m/z=657.86682 Da, MH+=1314.72637 Da, Match Tol.=0.6 Da

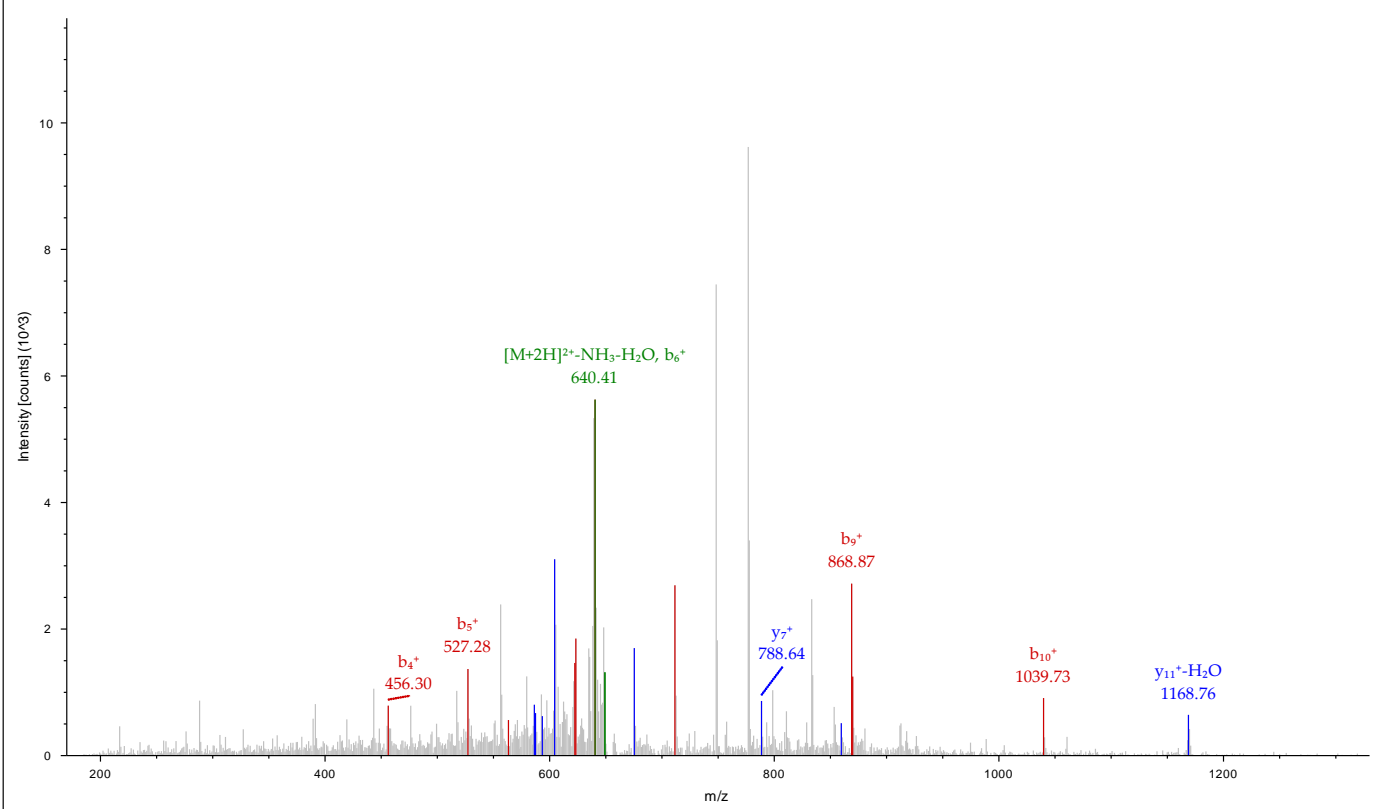



# peg.2988 11806

| #1 | b <sup>+</sup> | b <sup>2+</sup> | b <sup>3+</sup> | Seq.        | y <sup>+</sup> | y <sup>2+</sup> | y <sup>3+</sup> | #2 |
|----|----------------|-----------------|-----------------|-------------|----------------|-----------------|-----------------|----|
| 1  | 115.05021      | 58.02874        | 39.02159        | N           |                |                 |                 | 18 |
| 2  | 243.14518      | 122.07623       | 81.71991        | K           | 2106.04244     | 1053.52486      | 702.68566       | 17 |
| 3  | 344.19286      | 172.60007       | 115.40247       | T           | 1977.94747     | 989.47737       | 659.98734       | 16 |
| 4  | 514.29839      | 257.65283       | 172.10431       | K-Acetyl    | 1876.89979     | 938.95353       | 626.30478       | 15 |
| 5  | 627.38246      | 314.19487       | 209.79900       | L           | 1706.79426     | 853.90077       | 569.60294       | 14 |
| 6  | 740.46653      | 370.73690       | 247.49369       | I           | 1593.71019     | 797.35873       | 531.90825       | 13 |
| 7  | 837.51930      | 419.26329       | 279.84462       | P           | 1480.62612     | 740.81670       | 494.21356       | 12 |
| 8  | 1000.58262     | 500.79495       | 334.19906       | Y           | 1383.57335     | 692.29031       | 461.86263       | 11 |
| 9  | 1115.60957     | 558.30842       | 372.54137       | D           | 1220.51003     | 610.75865       | 407.50819       | 10 |
| 10 | 1243.66815     | 622.33771       | 415.22757       | Q           | 1105.48308     | 553.24518       | 369.16588       | 9  |
| 11 | 1390.70357     | 695.85542       | 464.23937       | M-Oxidation | 977.42450      | 489.21589       | 326.47968       | 8  |
| 12 | 1505.73052     | 753.36890       | 502.58169       | D           | 830.38908      | 415.69818       | 277.46788       | 7  |
| 13 | 1604.79894     | 802.90311       | 535.60450       | Y           | 715.36213      | 358.18470       | 239.12556       | 6  |
| 14 | 1732.89391     | 866.95059       | 578.30282       | K           | 616.29371      | 308.65049       | 206.10275       | 5  |
| 15 | 1829.94668     | 915.47698       | 610.65374       | P           | 488.19874      | 244.60301       | 163.40443       | 4  |
| 16 | 1958.98928     | 979.99828       | 653.66794       | E           | 391.14597      | 196.07662       | 131.05351       | 3  |
| 17 | 2087.04786     | 1044.02757      | 696.35414       | Q           | 262.10337      | 131.55532       | 88.03931        | 2  |
| 18 |                |                 |                 | D           | 134.04479      | 67.52603        | 45.35311        | 1  |

Extracted from: Z:\712AB\SK17-S (Ac)\Chichi-Abaumannii-SK17-S-Acetyl\_DrWu\_20140703.raw #11806 RT: 35.55 TMS, CID@35.00, z=+3, Mono m/z=740.70331 Da, MH+=2220.09537 Da, Match Tol.=0.6 Da

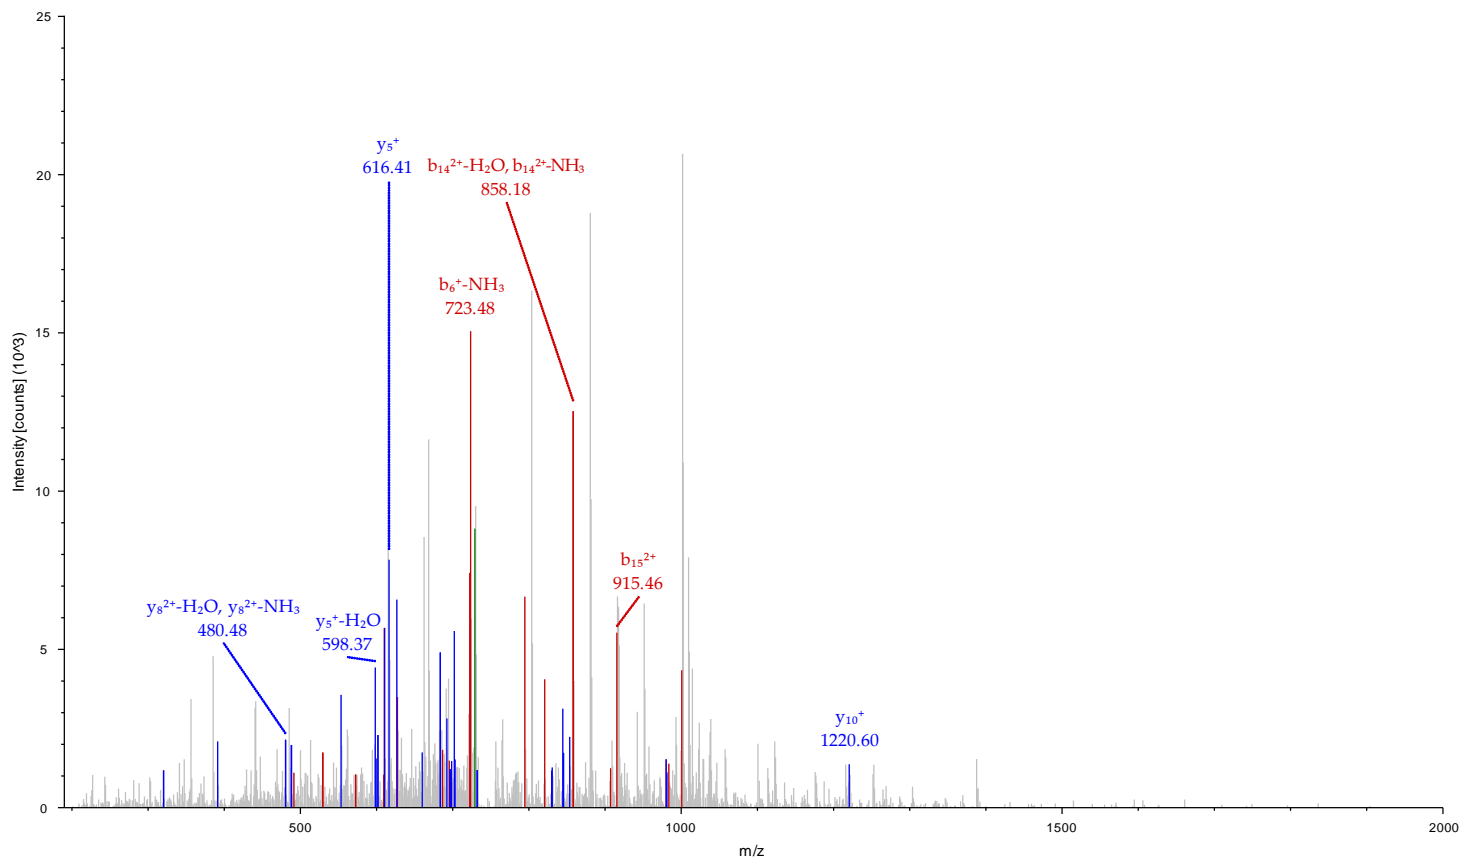

# peg.2989 24304

| #1 | b <sup>+</sup> | b <sup>2+</sup> | b <sup>3+</sup> | Seq.        | y <sup>+</sup> | y <sup>2+</sup> | y <sup>3+</sup> | #2 |
|----|----------------|-----------------|-----------------|-------------|----------------|-----------------|-----------------|----|
| 1  | 100.03931      | 50.52329        | 34.01795        | G-Acetyl    |                |                 |                 | 35 |
| 2  | 171.07643      | 86.04185        | 57.69699        | A           | 3472.90204     | 1736.95466      | 1158.30553      | 34 |
| 3  | 272.12411      | 136.56569       | 91.37955        | T           | 3401.86492     | 1701.43610      | 1134.62649      | 33 |
| 4  | 371.19253      | 186.09990       | 124.40236       | V           | 3300.81724     | 1650.91226      | 1100.94393      | 32 |
| 5  | 428.21400      | 214.61064       | 143.40952       | G           | 3201.74882     | 1601.37805      | 1067.92112      | 31 |
| 6  | 515.24603      | 258.12665       | 172.42019       | S           | 3144.72735     | 1572.86731      | 1048.91397      | 30 |
| 7  | 614.31445      | 307.66086       | 205.44300       | V           | 3057.69532     | 1529.35130      | 1019.90329      | 29 |
| 8  | 727.39852      | 364.20290       | 243.13769       | I           | 2958.62690     | 1479.81709      | 986.88048       | 28 |
| 9  | 824.45129      | 412.72928       | 275.48861       | P           | 2845.54283     | 1423.27505      | 949.18579       | 27 |
| 10 | 925.49897      | 463.25312       | 309.17117       | T           | 2748.49006     | 1374.74867      | 916.83487       | 26 |
| 11 | 1095.60451     | 548.30589       | 365.87302       | K-Acetyl    | 2647.44238     | 1324.22483      | 883.15231       | 25 |
| 12 | 1232.66342     | 616.83535       | 411.55932       | H           | 2477.33684     | 1239.17206      | 826.45046       | 24 |
| 13 | 1303.70054     | 652.35391       | 435.23836       | A           | 2340.27793     | 1170.64260      | 780.76416       | 23 |
| 14 | 1416.78461     | 708.89594       | 472.93305       | I           | 2269.24081     | 1135.12404      | 757.08512       | 22 |
| 15 | 1529.86868     | 765.43798       | 510.62774       | I           | 2156.15674     | 1078.58201      | 719.39043       | 21 |
| 16 | 1626.92145     | 813.96436       | 542.97867       | P           | 2043.07267     | 1022.03997      | 681.69574       | 20 |
| 17 | 1697.95857     | 849.48292       | 566.65771       | A           | 1946.01990     | 973.51359       | 649.34482       | 19 |
| 18 | 1768.99569     | 885.00148       | 590.33675       | A           | 1874.98278     | 937.99503       | 625.66578       | 18 |
| 19 | 1868.06411     | 934.53569       | 623.35955       | V           | 1803.94566     | 902.47647       | 601.98674       | 17 |
| 20 | 1925.08558     | 963.04643       | 642.36671       | G           | 1704.87724     | 852.94226       | 568.96393       | 16 |
| 21 | 2024.15400     | 1012.58064      | 675.38952       | V           | 1647.85577     | 824.43152       | 549.95677       | 15 |
| 22 | 2139.18095     | 1070.09411      | 713.73183       | D           | 1548.78735     | 774.89731       | 516.93397       | 14 |
| 23 | 2252.26502     | 1126.63615      | 751.42652       | I           | 1433.76040     | 717.38384       | 478.59165       | 13 |
| 24 | 2309.28649     | 1155.14688      | 770.43368       | G           | 1320.67633     | 660.84180       | 440.89696       | 12 |
| 25 | 2412.29568     | 1206.65148      | 804.77008       | C           | 1263.65486     | 632.33107       | 421.88980       | 11 |
| 26 | 2469.31715     | 1235.16221      | 823.77723       | G           | 1160.64567     | 580.82647       | 387.55341       | 10 |
| 27 | 2616.35256     | 1308.67992      | 872.78904       | M-Oxidation | 1103.62420     | 552.31574       | 368.54625       | 9  |
| 28 | 2730.39549     | 1365.70138      | 910.80335       | N           | 956.58879      | 478.79803       | 319.53445       | 8  |
| 29 | 2801.43261     | 1401.21994      | 934.48239       | A           | 842.54586      | 421.77657       | 281.52014       | 7  |
| 30 | 2914.51668     | 1457.76198      | 972.17708       | I           | 771.50874      | 386.25801       | 257.84110       | 6  |
| 31 | 3070.61780     | 1535.81254      | 1024.21078      | R           | 658.42467      | 329.71597       | 220.14641       | 5  |
| 32 | 3183.70187     | 1592.35457      | 1061.90547      | L           | 502.32355      | 251.66541       | 168.11270       | 4  |
| 33 | 3270.73390     | 1635.87059      | 1090.91615      | S           | 389.23948      | 195.12338       | 130.41801       | 3  |
| 34 | 3383.81797     | 1692.41262      | 1128.61084      | L           | 302.20745      | 151.60736       | 101.40733       | 2  |
| 35 |                |                 |                 | K-Acetyl    | 189.12338      | 95.06533        | 63.71264        | 1  |

Extracted from: Z:\712AB\SK17-S (Ac)Chichi-Abaumannii-SK17-S-Acetyl\_DrWu\_20140512.raw #24304 RT: 73.37  
 ITMS, CID@35.00, z=+3, Mono m/z=1191.32495 Da, MH+=3571.96030 Da, Match Tol.=0.6 Da

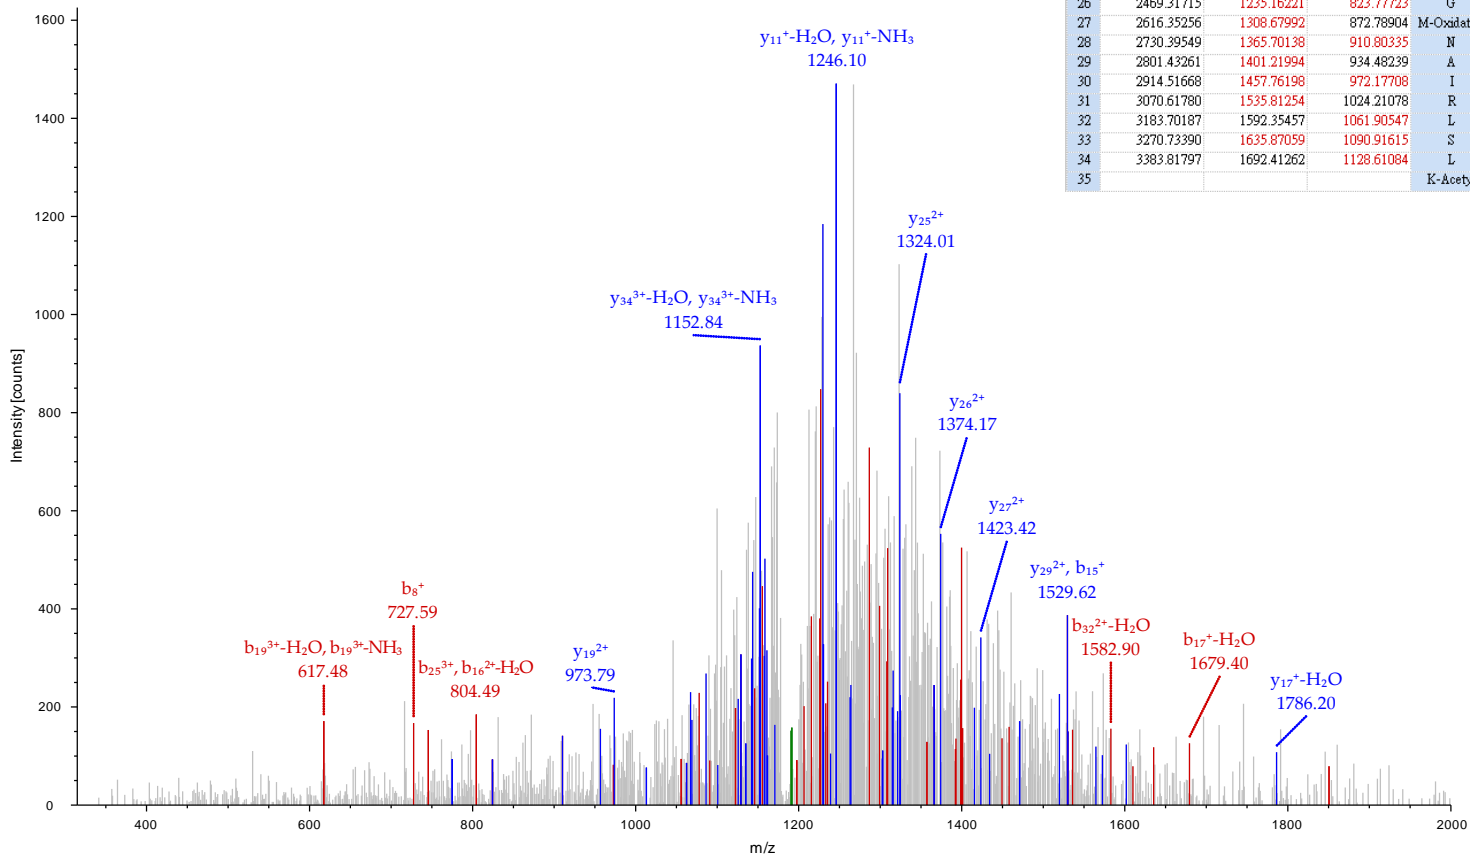

# peg.2991 7318 (K4)

| #1 | b <sup>+</sup> | b <sup>2+</sup> | Seq.     | y <sup>+</sup> | y <sup>2+</sup> | #2 |
|----|----------------|-----------------|----------|----------------|-----------------|----|
| 1  | 100.07570      | 50.54149        | Y        |                |                 | 14 |
| 2  | 171.11282      | 86.06005        | A        | 1491.74386     | 746.37557       | 13 |
| 3  | 300.15542      | 150.58135       | E        | 1420.70674     | 710.85701       | 12 |
| 4  | 470.26095      | 235.63411       | K-Acetyl | 1291.66414     | 646.33571       | 11 |
| 5  | 583.34502      | 292.17615       | L        | 1121.55860     | 561.28294       | 10 |
| 6  | 670.37705      | 335.69216       | S        | 1008.47453     | 504.74090       | 9  |
| 7  | 799.41965      | 400.21346       | E        | 921.44250      | 461.22489       | 8  |
| 8  | 962.48297      | 481.74512       | Y        | 792.39990      | 396.70359       | 7  |
| 9  | 1059.53574     | 530.27151       | P        | 629.33658      | 315.17193       | 6  |
| 10 | 1173.57867     | 587.29297       | N        | 532.28381      | 266.64554       | 5  |
| 11 | 1244.61579     | 622.81153       | A        | 418.24088      | 209.62408       | 4  |
| 12 | 1345.66347     | 673.33537       | T        | 347.20376      | 174.10552       | 3  |
| 13 | 1416.70059     | 708.85393       | A        | 246.15608      | 123.58168       | 2  |
| 14 |                |                 | R        | 175.11896      | 88.06312        | 1  |

Extracted from: Z:\712AB\SK17-S (Ac)\Chichi-Abaumannii-SK17-S-Acetyl\_DrWu\_20140512.raw #7318 RT: 28.38  
 ITMS, CID@35.00, z=+2, Mono m/z=795.90906 Da, MH+=1590.81084 Da, Match Tol.=0.6 Da

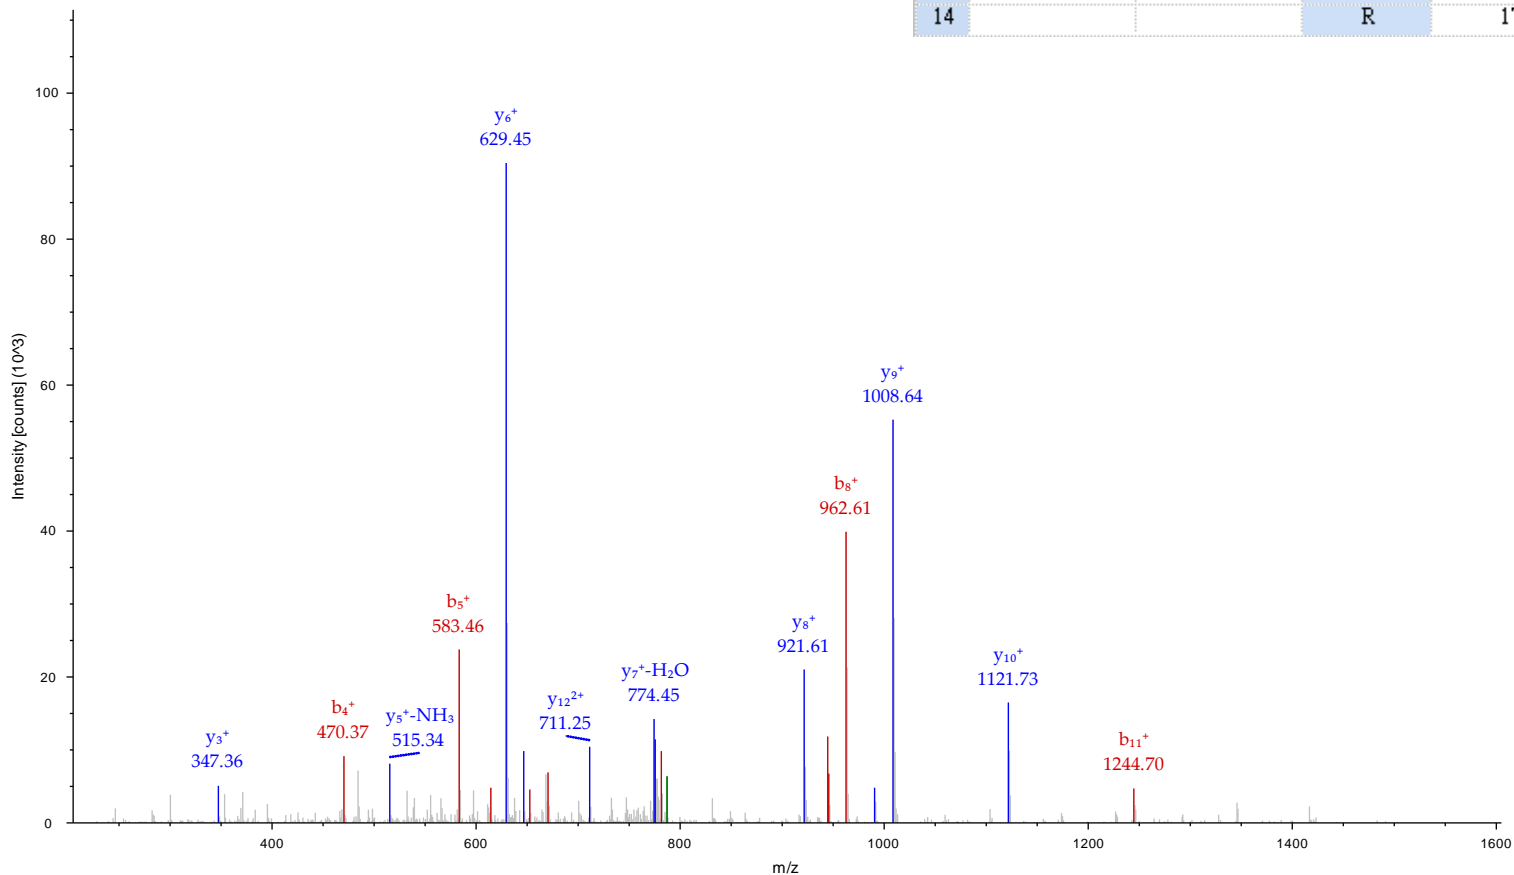

# peg.2991 8522 (K4)

| #1 | b <sup>+</sup> | b <sup>2+</sup> | Seq.     | y <sup>+</sup> | y <sup>2+</sup> | #2 |
|----|----------------|-----------------|----------|----------------|-----------------|----|
| 1  | 100.07570      | 50.54149        | V        |                |                 | 14 |
| 2  | 171.11282      | 86.06005        | A        | 1491.74386     | 746.37557       | 13 |
| 3  | 300.15542      | 150.58135       | E        | 1420.70674     | 710.85701       | 12 |
| 4  | 470.26095      | 235.63411       | K-Acetyl | 1291.66414     | 646.33571       | 11 |
| 5  | 583.34502      | 292.17615       | L        | 1121.55860     | 561.28294       | 10 |
| 6  | 670.37705      | 335.69216       | S        | 1008.47453     | 504.74090       | 9  |
| 7  | 799.41965      | 400.21346       | E        | 921.44250      | 461.22489       | 8  |
| 8  | 962.48297      | 481.74512       | Y        | 792.39990      | 396.70359       | 7  |
| 9  | 1059.53574     | 530.27151       | P        | 629.33658      | 315.17193       | 6  |
| 10 | 1173.57867     | 587.29297       | N        | 532.28381      | 266.64554       | 5  |
| 11 | 1244.61579     | 622.81153       | A        | 418.24088      | 209.62408       | 4  |
| 12 | 1345.66347     | 673.33537       | T        | 347.20376      | 174.10552       | 3  |
| 13 | 1416.70059     | 708.85393       | A        | 246.15608      | 123.58168       | 2  |
| 14 |                |                 | R        | 175.11896      | 88.06312        | 1  |

Extracted from: Z:\712AB\SK17-S (Ac)\Chichi-Abaumannii-SK17-S-Acetyl\_DrWu\_20140703.raw #8522 RT: 27.84  
 ITMS, CID@35.00, z=+2, Mono m/z=795.90997 Da, MH+=1590.81267 Da, Match Tol.=0.6 Da

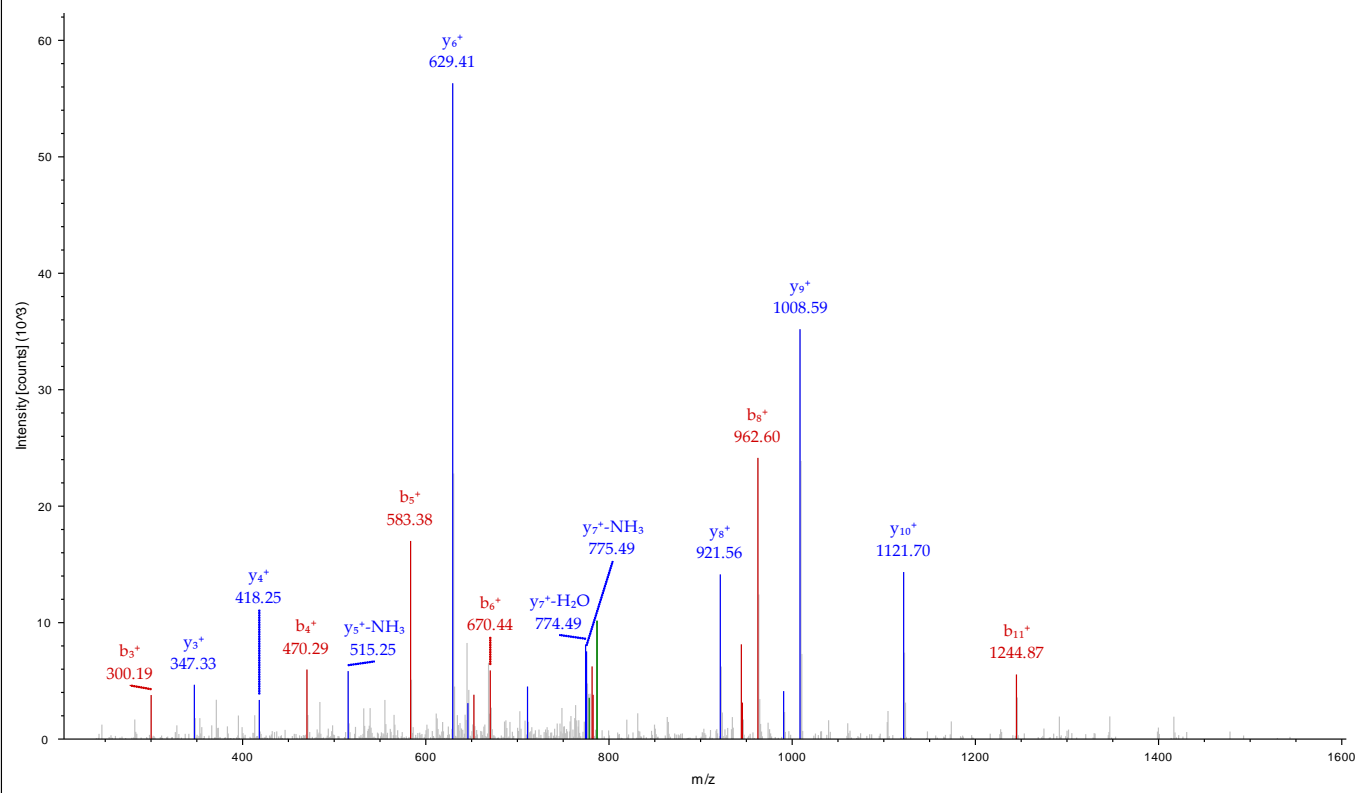

peg.2991 17916 (K16)

| #1 | b <sup>+</sup> | b <sup>2+</sup> | Seq.     | y <sup>+</sup> | y <sup>2+</sup> | #2 |
|----|----------------|-----------------|----------|----------------|-----------------|----|
| 1  | 114.09135      | 57.54931        | L        |                |                 | 18 |
| 2  | 201.12338      | 101.06533       | S        | 1948.94002     | 974.97365       | 17 |
| 3  | 302.17106      | 151.58917       | T        | 1861.90799     | 931.45763       | 16 |
| 4  | 430.22964      | 215.61846       | Q        | 1760.86031     | 880.93379       | 15 |
| 5  | 487.25111      | 244.12919       | G        | 1632.80173     | 816.90450       | 14 |
| 6  | 634.31953      | 317.66340       | F        | 1575.78026     | 788.39377       | 13 |
| 7  | 705.35665      | 353.18196       | A        | 1428.71184     | 714.85956       | 12 |
| 8  | 891.43597      | 446.22162       | W        | 1357.67472     | 679.34100       | 11 |
| 9  | 1006.46292     | 503.73510       | D        | 1171.59540     | 586.30134       | 10 |
| 10 | 1134.52150     | 567.76439       | Q        | 1056.56845     | 528.78786       | 9  |
| 11 | 1231.57427     | 616.29077       | P        | 928.50987      | 464.75857       | 8  |
| 12 | 1344.65834     | 672.83281       | I        | 831.45710      | 416.23219       | 7  |
| 13 | 1415.69546     | 708.35137       | A        | 718.37303      | 359.69015       | 6  |
| 14 | 1530.72241     | 765.86484       | D        | 647.33591      | 324.17159       | 5  |
| 15 | 1644.76534     | 822.88631       | N        | 532.30896      | 266.65812       | 4  |
| 16 | 1814.87087     | 907.93907       | K-Acetyl | 418.26603      | 209.63665       | 3  |
| 17 | 1915.91855     | 958.46291       | T        | 248.16049      | 124.58388       | 2  |
| 18 |                |                 | K        | 147.11281      | 74.06004        | 1  |

Extracted from: Z:\712AB\SK17-S (Ac)\Chichi-Abaumannii-SK17-S-Acetyl\_DrWu\_20140703.raw #17916 RT: 50.19  
 ITMS, CID@35.00, z=+2, Mono m/z=1031.51599 Da, MH+=2062.02471 Da, Match Tol.=0.6 Da

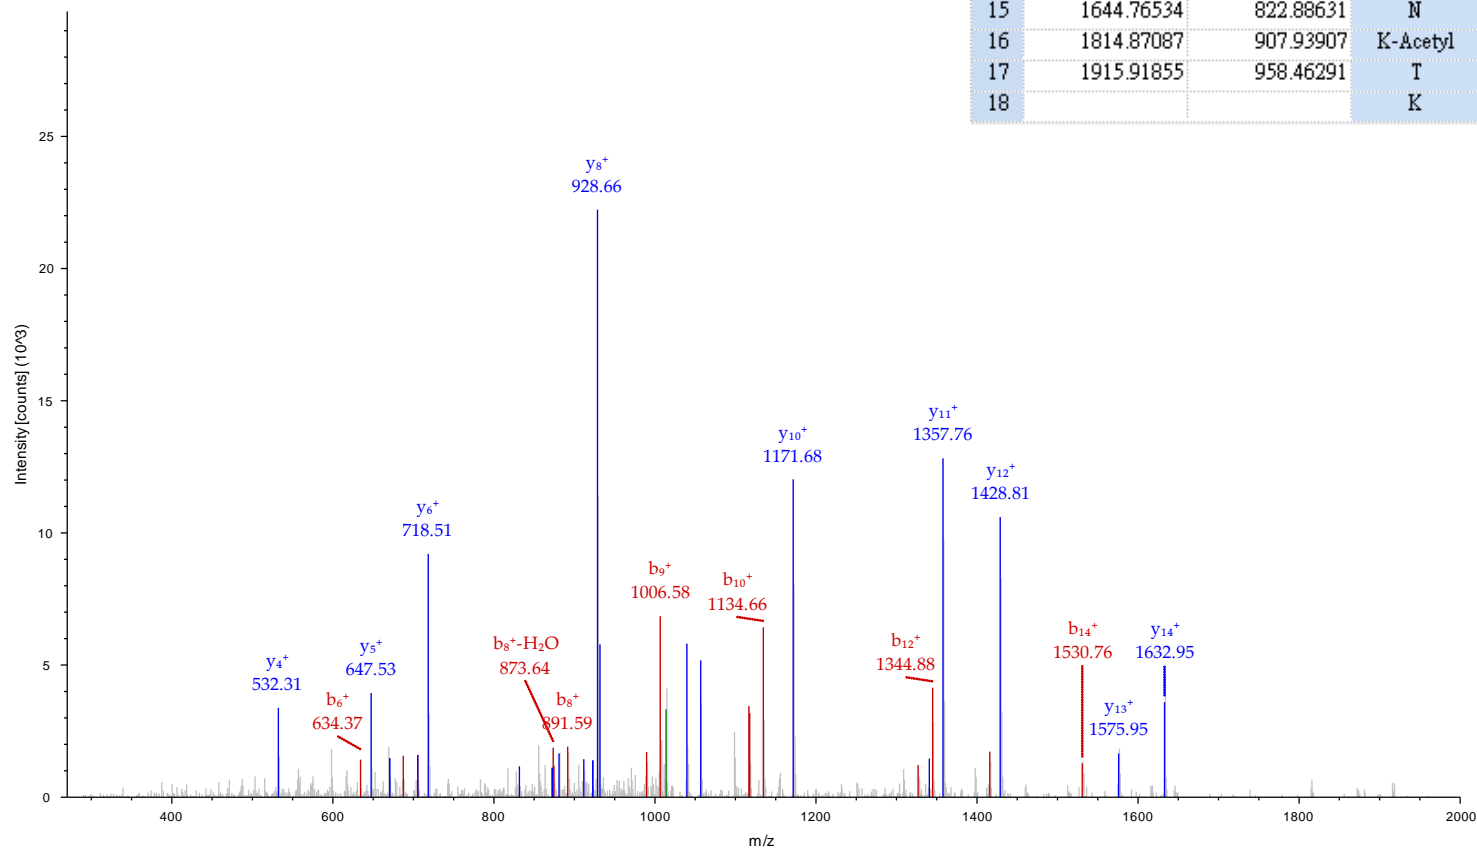

peg.2991 18587 (K16)

| #1 | b <sup>+</sup> | b <sup>2+</sup> | Seq.     | y <sup>+</sup> | y <sup>2+</sup> | #2 |
|----|----------------|-----------------|----------|----------------|-----------------|----|
| 1  | 114.09135      | 57.54931        | L        |                |                 | 18 |
| 2  | 201.12338      | 101.06533       | S        | 1948.94002     | 974.97365       | 17 |
| 3  | 302.17106      | 151.58917       | T        | 1861.90799     | 931.45763       | 16 |
| 4  | 430.22964      | 215.61846       | Q        | 1760.86031     | 880.93379       | 15 |
| 5  | 487.25111      | 244.12919       | G        | 1632.80173     | 816.90450       | 14 |
| 6  | 634.31953      | 317.66340       | F        | 1575.78026     | 788.39377       | 13 |
| 7  | 705.35665      | 353.18196       | A        | 1428.71184     | 714.85956       | 12 |
| 8  | 891.43597      | 446.22162       | W        | 1357.67472     | 679.34100       | 11 |
| 9  | 1006.46292     | 503.73510       | D        | 1171.59540     | 586.30134       | 10 |
| 10 | 1134.52150     | 567.76439       | Q        | 1056.56845     | 528.78786       | 9  |
| 11 | 1231.57427     | 616.29077       | P        | 928.50987      | 464.75857       | 8  |
| 12 | 1344.65834     | 672.83281       | I        | 831.45710      | 416.23219       | 7  |
| 13 | 1415.69546     | 708.35137       | A        | 718.37303      | 359.69015       | 6  |
| 14 | 1530.72241     | 765.86484       | D        | 647.33591      | 324.17159       | 5  |
| 15 | 1644.76534     | 822.88631       | N        | 532.30896      | 266.65812       | 4  |
| 16 | 1814.87087     | 907.93907       | K-Acetyl | 418.26603      | 209.63665       | 3  |
| 17 | 1915.91855     | 958.46291       | T        | 248.16049      | 124.58388       | 2  |
| 18 |                |                 | K        | 147.11281      | 74.06004        | 1  |

Extracted from: Z:\712AB\SK17-S (Ac)\Chichi-Abaumannii-SK17-S-Acetyl\_DrWu\_20140512.raw #15857 RT: 49.81  
 ITMS\_CID@35.00, z=+2, Mono m/z=1031.51465 Da, MH+=2062.02202 Da, Match Tol.=0.6 Da

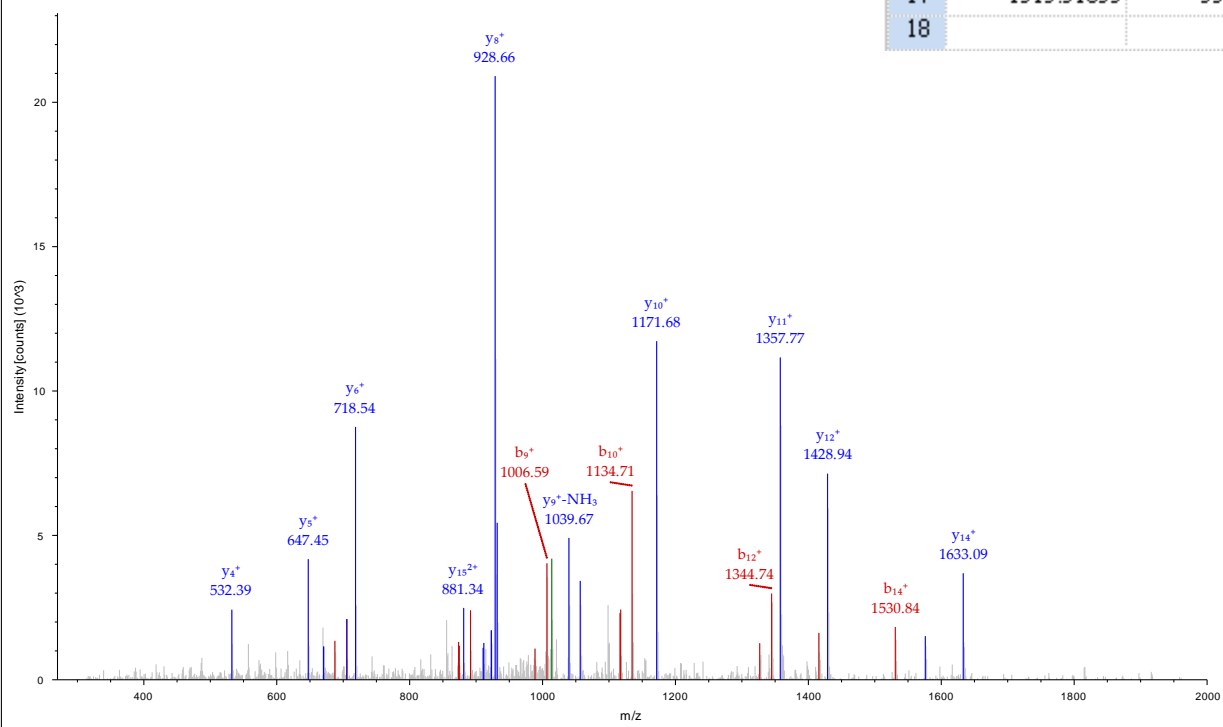

peg.2992 9463

| #1 | b <sup>+</sup> | b <sup>2+</sup> | Seq.     | y <sup>+</sup> | y <sup>2+</sup> | #2 |
|----|----------------|-----------------|----------|----------------|-----------------|----|
| 1  | 174.05834      | 87.53281        | M-Acetyl |                |                 | 11 |
| 2  | 245.09546      | 123.05137       | A        | 1156.63212     | 578.81970       | 10 |
| 3  | 332.12749      | 166.56738       | S        | 1085.59500     | 543.30114       | 9  |
| 4  | 431.19591      | 216.10159       | V        | 998.56297      | 499.78512       | 8  |
| 5  | 560.23851      | 280.62289       | E        | 899.49455      | 450.25091       | 7  |
| 6  | 673.32258      | 337.16493       | L        | 770.45195      | 385.72961       | 6  |
| 7  | 843.42812      | 422.21770       | K-Acetyl | 657.36788      | 329.18758       | 5  |
| 8  | 957.47105      | 479.23916       | N        | 487.26234      | 244.13481       | 4  |
| 9  | 1058.51873     | 529.76300       | T        | 373.21941      | 187.11334       | 3  |
| 10 | 1155.57150     | 578.28939       | P        | 272.17173      | 136.58950       | 2  |
| 11 |                |                 | R        | 175.11896      | 88.06312        | 1  |

Extracted from: Z:\712AB\SK17-S (Ac)\Chichi-Abaumannii-SK17-R-Acetyl\_DrWu\_20140703.raw #9463 RT: 30.86  
 ITMS, CID@35.00, z=+2, Mono m/z=665.34015 Da, MH+=1329.67302 Da, Match Tol.=0.6 Da

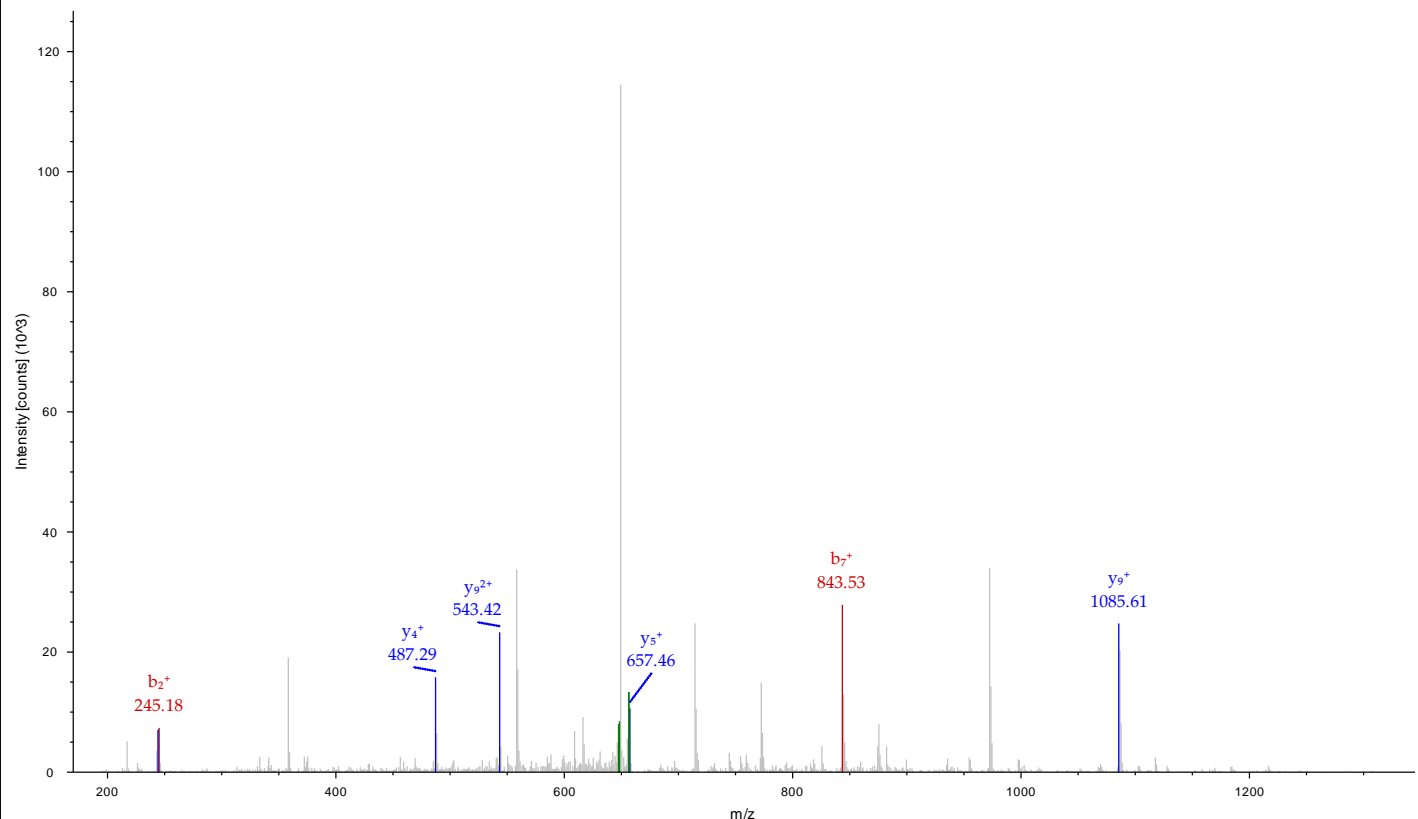

peg.300 9150

| #1 | b <sup>+</sup> | b <sup>2+</sup> | Seq.        | y <sup>+</sup> | y <sup>2+</sup> | #2 |
|----|----------------|-----------------|-------------|----------------|-----------------|----|
| 1  | 115.05021      | 58.02874        | N           |                |                 | 11 |
| 2  | 230.07716      | 115.54222       | D           | 1291.61001     | 646.30864       | 10 |
| 3  | 416.15648      | 208.58188       | W           | 1176.58306     | 588.79517       | 9  |
| 4  | 529.24055      | 265.12391       | L           | 990.50374      | 495.75551       | 8  |
| 5  | 689.27120      | 345.13924       | C-Carbam*** | 877.41967      | 439.21347       | 7  |
| 6  | 776.30323      | 388.65525       | S           | 717.38902      | 359.19815       | 6  |
| 7  | 891.33018      | 446.16873       | D           | 630.35699      | 315.68213       | 5  |
| 8  | 1061.43572     | 531.22150       | K-Acetyl    | 515.33004      | 258.16866       | 4  |
| 9  | 1174.51979     | 587.76353       | I           | 345.22450      | 173.11589       | 3  |
| 10 | 1231.54126     | 616.27427       | G           | 232.14043      | 116.57385       | 2  |
| 11 |                |                 | R           | 175.11896      | 88.06312        | 1  |

Extracted from: Z:\712AB\SK17-S (Ac)\Chichi-Abaumannii-SK17-R-Acetyl\_DrWu\_20140703.raw #9150 RT: 30.13  
 ITMS, CID@35.00, z=+2, Mono m/z=703.32587 Da, MH+=1405.64446 Da, Match Tol.=0.6 Da

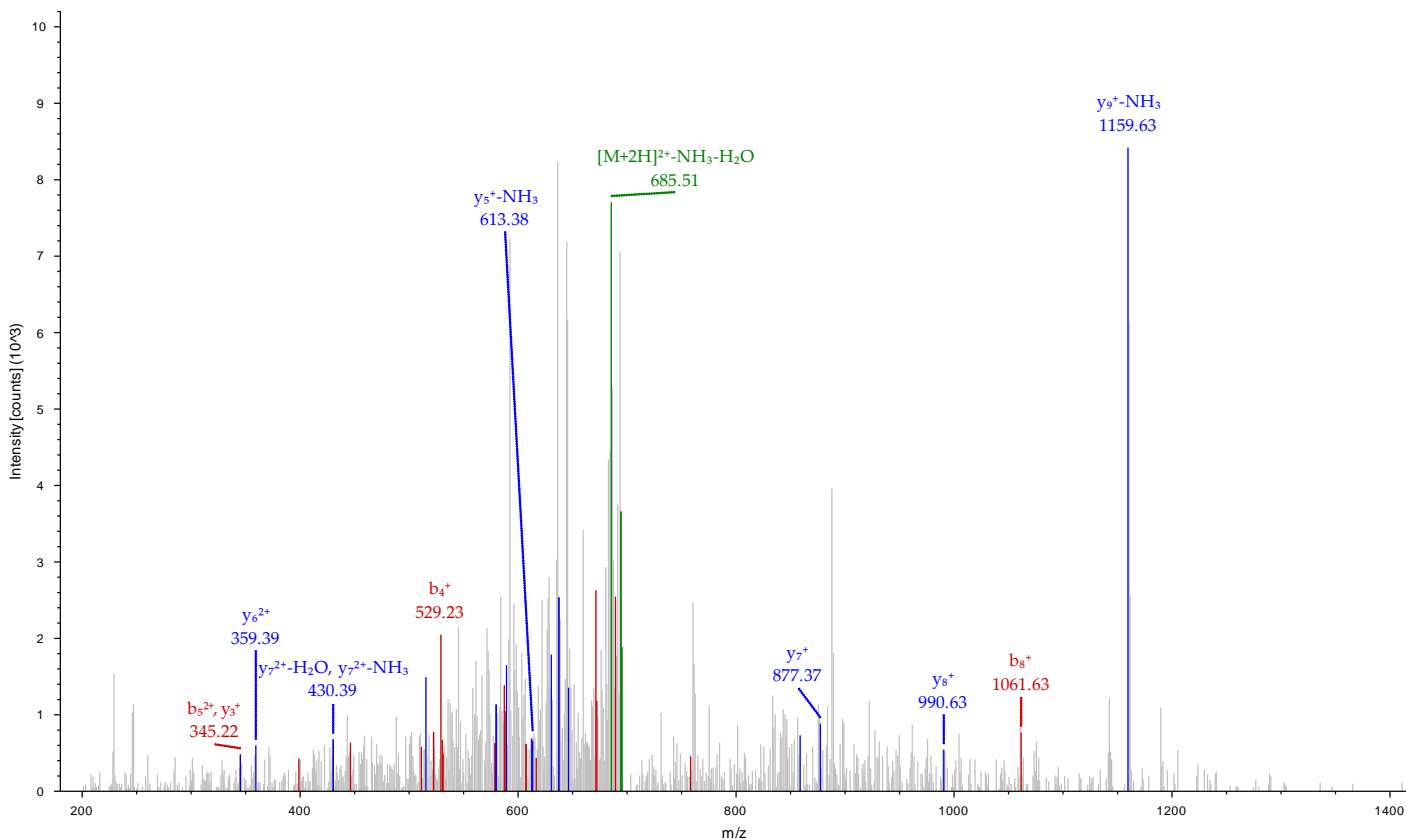



peg.300 9826

| #1 | b <sup>+</sup> | b <sup>2+</sup> | Seq.        | y <sup>+</sup> | y <sup>2+</sup> | #2 |
|----|----------------|-----------------|-------------|----------------|-----------------|----|
| 1  | 115.05021      | 58.02874        | N           |                |                 | 11 |
| 2  | 230.07716      | 115.54222       | D           | 1291.61001     | 646.30864       | 10 |
| 3  | 416.15648      | 208.58188       | W           | 1176.58306     | 588.79517       | 9  |
| 4  | 529.24055      | 265.12391       | L           | 990.50374      | 495.75551       | 8  |
| 5  | 689.27120      | 345.13924       | C-Carbam... | 877.41967      | 439.21347       | 7  |
| 6  | 776.30323      | 388.65525       | S           | 717.38902      | 359.19815       | 6  |
| 7  | 891.33018      | 446.16873       | D           | 630.35699      | 315.68213       | 5  |
| 8  | 1061.43572     | 531.22150       | K-Acetyl    | 515.33004      | 258.16866       | 4  |
| 9  | 1174.51979     | 587.76353       | I           | 345.22450      | 173.11589       | 3  |
| 10 | 1231.54126     | 616.27427       | G           | 232.14043      | 116.57385       | 2  |
| 11 |                |                 | R           | 175.11896      | 88.06312        | 1  |

Extracted from: Z:\712AB\SK17-S (Ac)\Chichi-Abaumannii-SK17-S-Acetyl\_DrWu\_20140703.raw #9826 RT: 30.89  
 ITMS, CID@35.00, z=+2, Mono m/z=703.32678 Da, MH+=1405.64629 Da, Match Tol.=0.6 Da

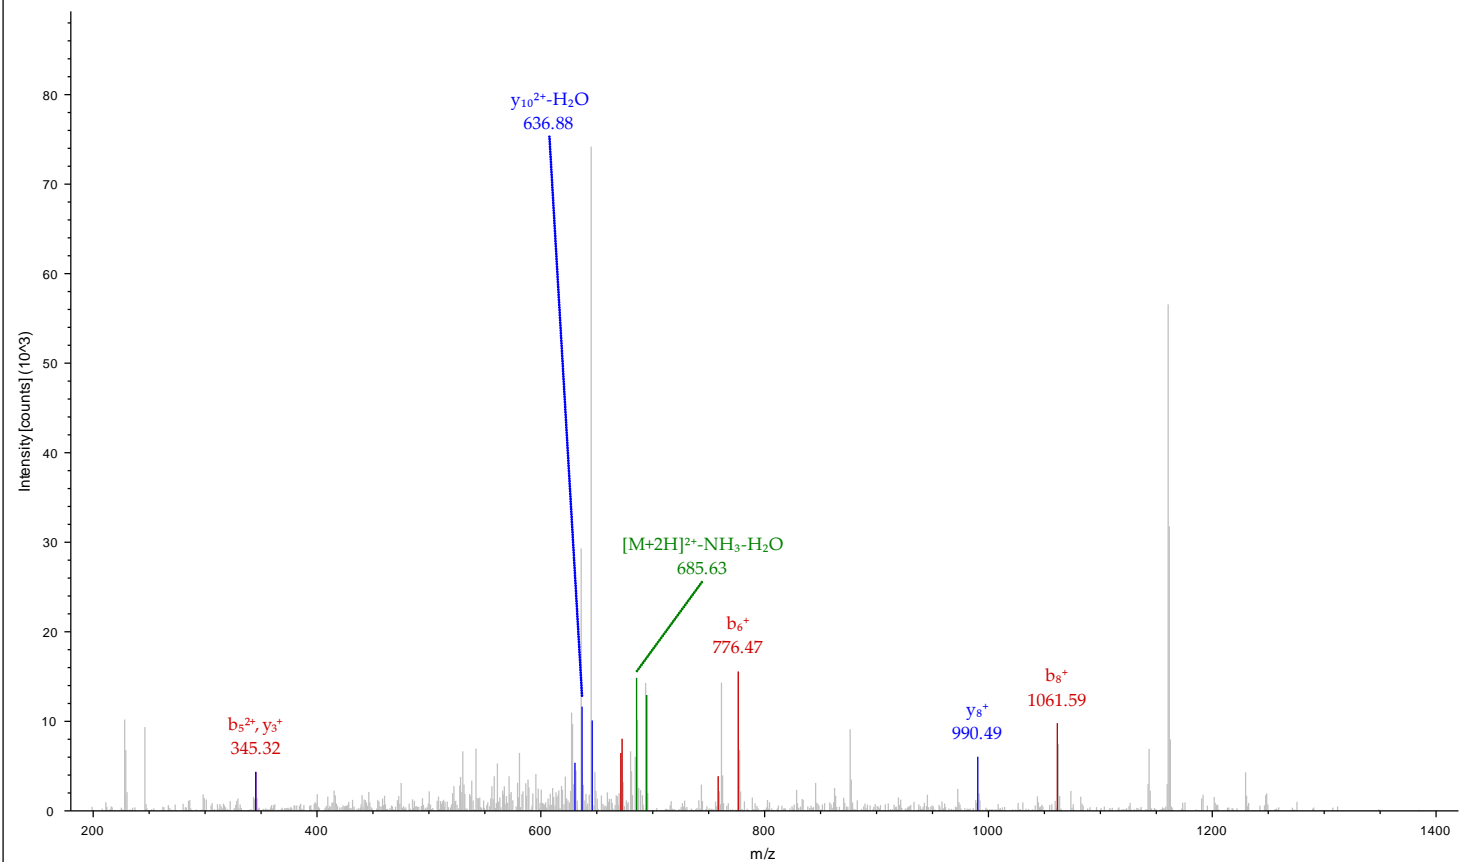

peg.3015 4727

| #1 | b <sup>+</sup> | b <sup>2+</sup> | Seq.     | y <sup>+</sup> | y <sup>2+</sup> | #2 |
|----|----------------|-----------------|----------|----------------|-----------------|----|
| 1  | 157.06077      | 79.03402        | N-Acetyl |                |                 | 10 |
| 2  | 244.09280      | 122.55004       | S        | 1074.57900     | 537.79314       | 9  |
| 3  | 357.17687      | 179.09207       | I        | 987.54697      | 494.27712       | 8  |
| 4  | 444.20890      | 222.60809       | S        | 874.46290      | 437.73509       | 7  |
| 5  | 558.25183      | 279.62955       | N        | 787.43087      | 394.21907       | 6  |
| 6  | 728.35737      | 364.68232       | K-Acetyl | 673.38794      | 337.19761       | 5  |
| 7  | 815.38940      | 408.19834       | S        | 503.28241      | 252.14484       | 4  |
| 8  | 928.47347      | 464.74037       | I        | 416.25038      | 208.62883       | 3  |
| 9  | 1042.51640     | 521.76184       | N        | 303.16631      | 152.08679       | 2  |
| 10 |                |                 | K-Acetyl | 189.12338      | 95.06533        | 1  |

Extracted from: Z:\712AB\SK17-S (Ac)\Chichi-Abaumannii-SK17-S-Acetyl\_DrWu\_20140703.raw #4727 RT: 19.07  
 ITMS, CID@35.00, z=+2, Mono m/z=615.81470 Da, MH+=1230.62212 Da, Match Tol.=0.6 Da

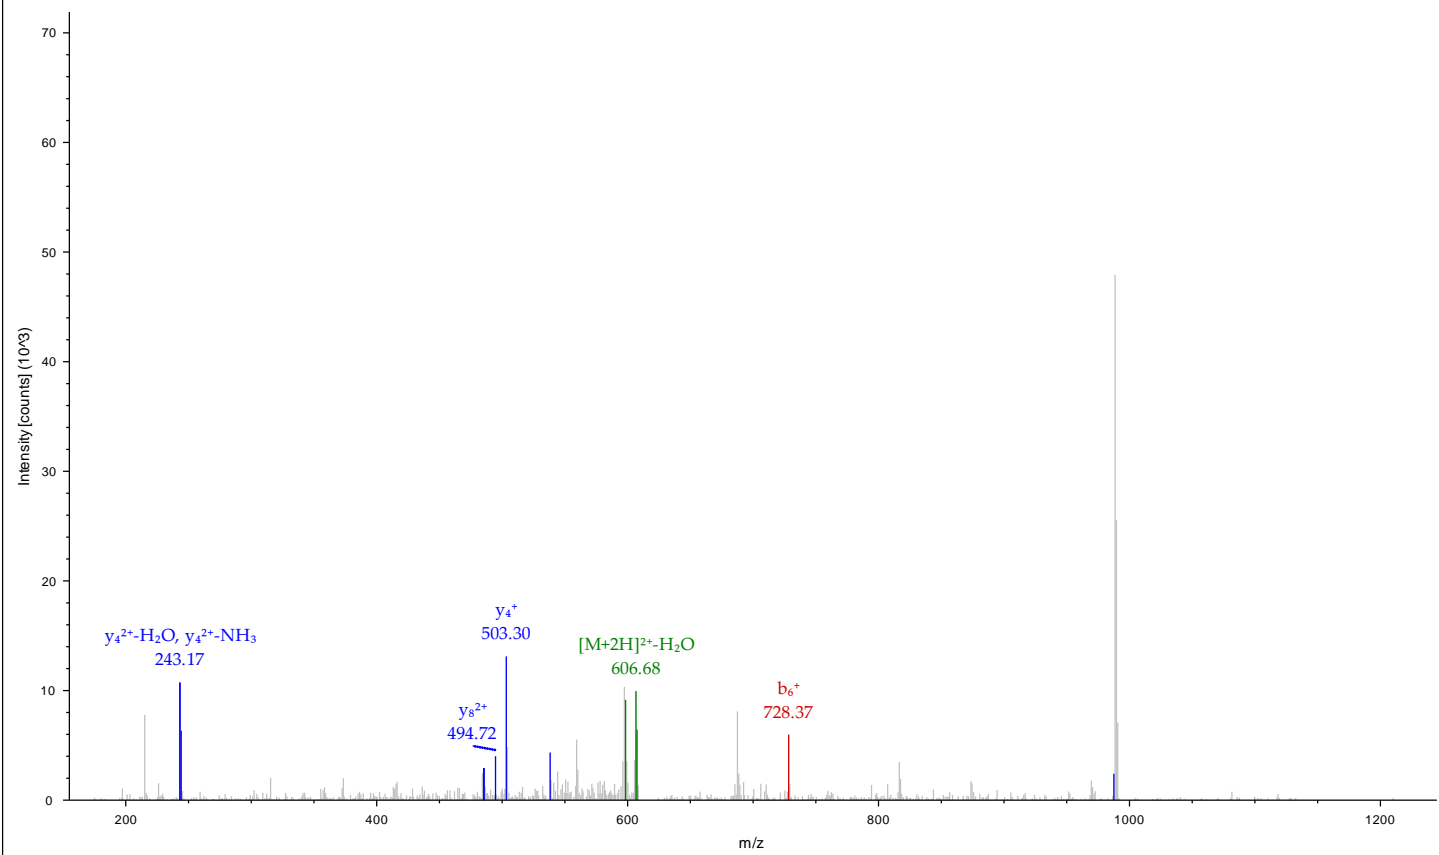

peg.3021

18838

| #1 | b <sup>+</sup> | b <sup>2+</sup> | b <sup>3+</sup> | Seq.     | y <sup>+</sup> | y <sup>2+</sup> | y <sup>3+</sup> | #2 |
|----|----------------|-----------------|-----------------|----------|----------------|-----------------|-----------------|----|
| 1  | 129.10225      | 65.05476        | 43.70560        | K        |                |                 |                 | 18 |
| 2  | 226.15502      | 113.58115       | 76.05652        | P        | 1929.02634     | 965.01681       | 643.68030       | 17 |
| 3  | 339.23909      | 170.12318       | 113.75121       | I        | 1831.97357     | 916.49042       | 611.32937       | 16 |
| 4  | 426.27112      | 213.63920       | 142.76189       | S        | 1718.88950     | 859.94839       | 573.63468       | 15 |
| 5  | 523.32389      | 262.16558       | 175.11281       | P        | 1631.85747     | 816.43237       | 544.62401       | 14 |
| 6  | 652.36649      | 326.68688       | 218.12701       | E        | 1534.80470     | 767.90599       | 512.27308       | 13 |
| 7  | 815.42981      | 408.21854       | 272.48145       | Y        | 1405.76210     | 703.38469       | 469.25888       | 12 |
| 8  | 946.47031      | 473.73879       | 316.16162       | M        | 1242.69878     | 621.85303       | 414.90444       | 11 |
| 9  | 1017.50743     | 509.25735       | 339.84066       | A        | 1111.65828     | 556.33278       | 371.22428       | 10 |
| 10 | 1145.56601     | 573.28664       | 382.52685       | Q        | 1040.62116     | 520.81422       | 347.54524       | 9  |
| 11 | 1216.60313     | 608.80520       | 406.20589       | A        | 912.56258      | 456.78493       | 304.85904       | 8  |
| 12 | 1329.68720     | 665.34724       | 443.90058       | I        | 841.52546      | 421.26637       | 281.18000       | 7  |
| 13 | 1428.75562     | 714.88145       | 476.92339       | V        | 728.44139      | 364.72433       | 243.48531       | 6  |
| 14 | 1598.86115     | 799.93421       | 533.62523       | K-Acetyl | 629.37297      | 315.19012       | 210.46251       | 5  |
| 15 | 1655.88262     | 828.44495       | 552.63239       | G        | 459.26743      | 230.13735       | 153.76066       | 4  |
| 16 | 1754.95104     | 877.97916       | 585.65520       | V        | 402.24596      | 201.62662       | 134.75350       | 3  |
| 17 | 1883.00962     | 942.00845       | 628.34139       | Q        | 303.17754      | 152.09241       | 101.73070       | 2  |
| 18 |                |                 |                 | R        | 175.11896      | 88.06312        | 59.04450        | 1  |

Extracted from: Z:\712AB\SK17-S (Ac)\Chichi-Abaumannii-SK17-S-Acetyl\_DrWu\_20140703.raw #18838 RT: 52.43  
 IMS, CID@35.00, z=+3, Mono m/z=686.38409 Da, MH+=2057.13773 Da, Match Tol.=0.6 Da

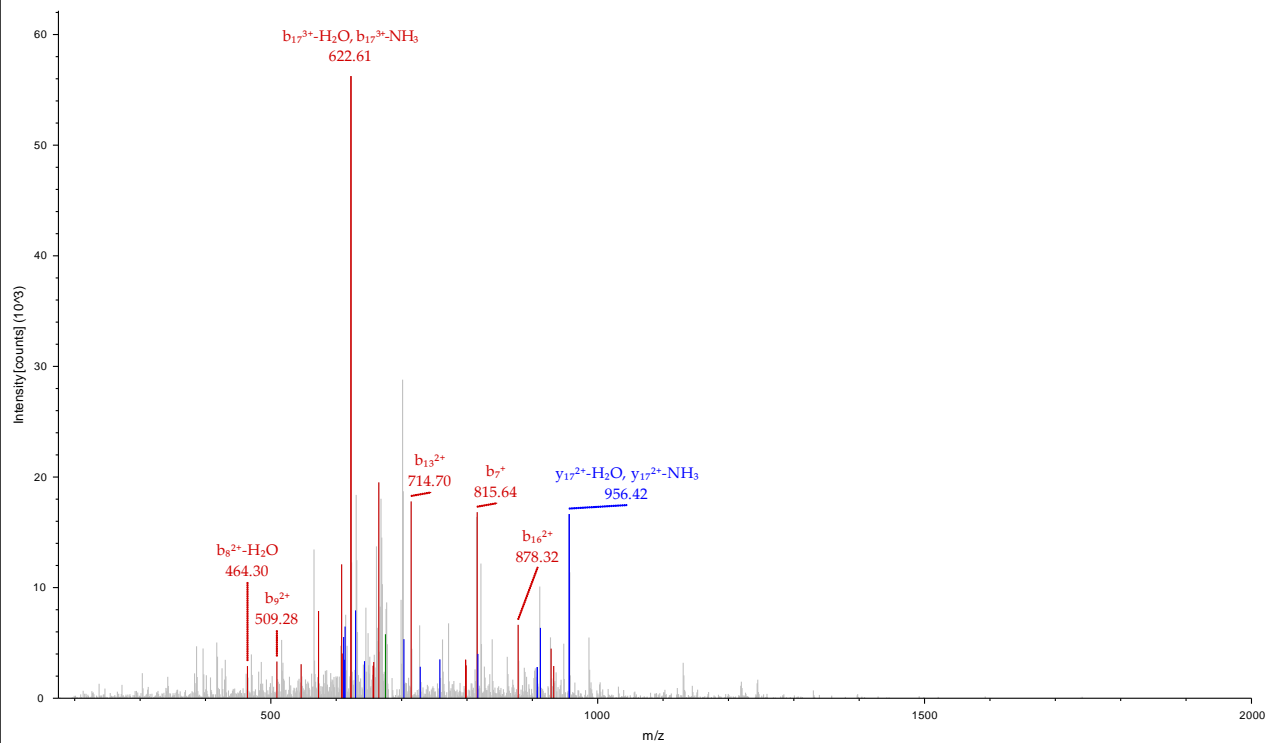

peg.3067 27946

| #1 | b <sup>+</sup> | b <sup>2+</sup> | Seq.     | y <sup>+</sup> | y <sup>2+</sup> | #2 |
|----|----------------|-----------------|----------|----------------|-----------------|----|
| 1  | 114.09135      | 57.54931        | I        |                |                 | 13 |
| 2  | 213.15977      | 107.08352       | V        | 1299.75192     | 650.37960       | 12 |
| 3  | 328.18672      | 164.59700       | D        | 1200.68350     | 600.84539       | 11 |
| 4  | 443.21367      | 222.11047       | D        | 1085.65655     | 543.33191       | 10 |
| 5  | 556.29774      | 278.65251       | L        | 970.62960      | 485.81844       | 9  |
| 6  | 726.40327      | 363.70527       | K-Acetyl | 857.54553      | 429.27640       | 8  |
| 7  | 825.47169      | 413.23948       | V        | 687.43999      | 344.22363       | 7  |
| 8  | 912.50372      | 456.75550       | S        | 588.37157      | 294.68942       | 6  |
| 9  | 1025.58779     | 513.29753       | L        | 501.33954      | 251.17341       | 5  |
| 10 | 1082.60926     | 541.80827       | G        | 388.25547      | 194.63137       | 4  |
| 11 | 1153.64638     | 577.32683       | A        | 331.23400      | 166.12064       | 3  |
| 12 | 1266.73045     | 633.86886       | L        | 260.19688      | 130.60208       | 2  |
| 13 |                |                 | K        | 147.11281      | 74.06004        | 1  |

Extracted from: Z:\712AB\SK17-S (Ac)\Chichi-Abaumannii-SK17-R-Acetyl\_DrWu\_20140703.raw #27946 RT: 76.66  
 ITMS, CID@35.00, z=+2, Mono m/z=706.92242 Da, MH+=1412.83757 Da, Match Tol.=0.6 Da

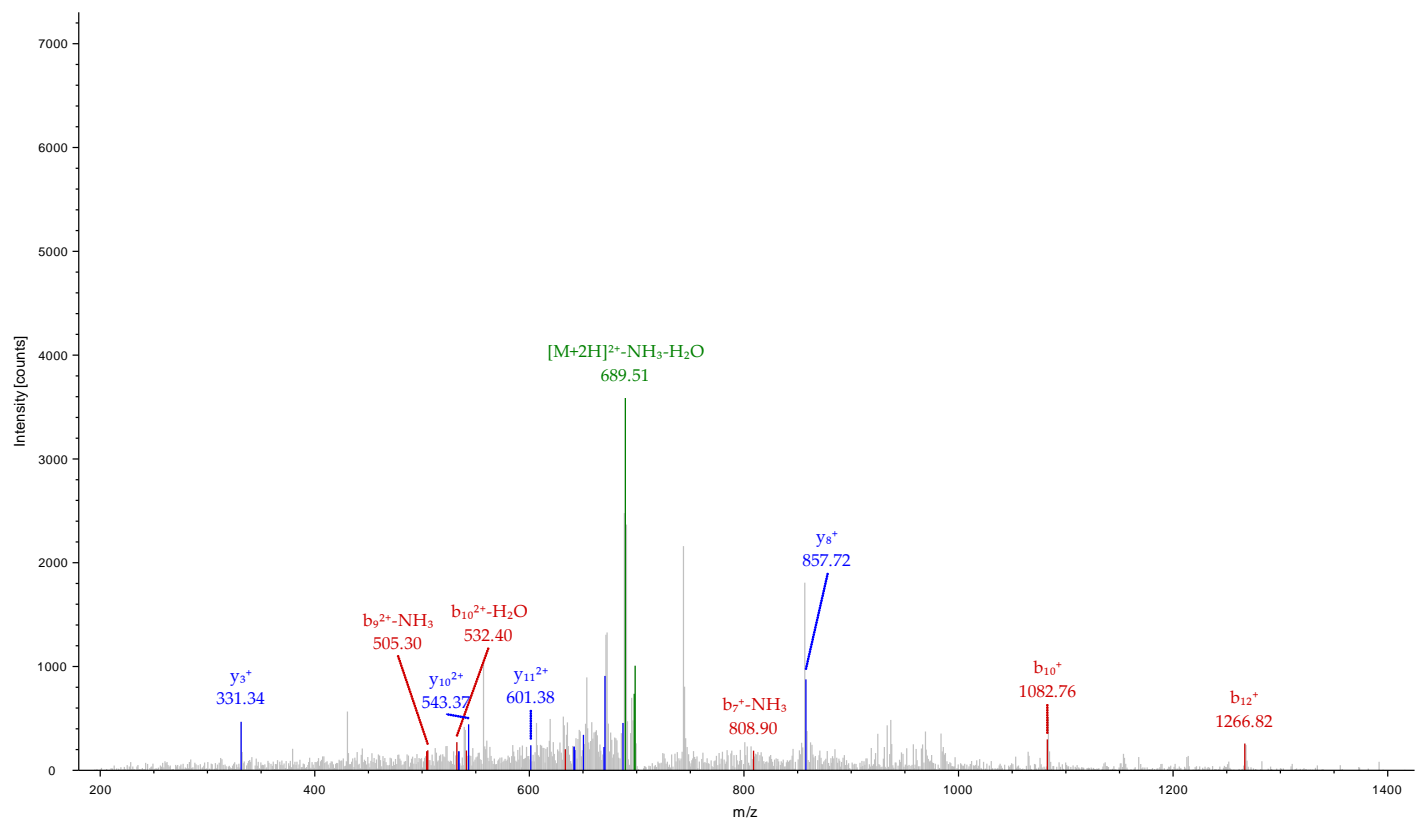

peg.3078

16051

| #1 | b <sup>+</sup> | b <sup>2+</sup> | Seq.     | y <sup>+</sup> | y <sup>2+</sup> | #2 |
|----|----------------|-----------------|----------|----------------|-----------------|----|
| 1  | 190.08626      | 95.54677        | F-Acetyl |                |                 | 12 |
| 2  | 247.10773      | 124.05750       | G        | 1345.72234     | 673.36481       | 11 |
| 3  | 403.20885      | 202.10806       | R        | 1288.70087     | 644.85407       | 10 |
| 4  | 500.26162      | 250.63445       | P        | 1132.59975     | 566.80351       | 9  |
| 5  | 670.36716      | 335.68722       | K-Acetyl | 1035.54698     | 518.27713       | 8  |
| 6  | 785.39411      | 393.20069       | D        | 865.44144      | 433.22436       | 7  |
| 7  | 900.42106      | 450.71417       | D        | 750.41449      | 375.71088       | 6  |
| 8  | 1063.48438     | 532.24583       | Y        | 635.38754      | 318.19741       | 5  |
| 9  | 1176.56845     | 588.78786       | L        | 472.32422      | 236.66575       | 4  |
| 10 | 1289.65252     | 645.32990       | I        | 359.24015      | 180.12371       | 3  |
| 11 | 1360.68964     | 680.84846       | A        | 246.15608      | 123.58168       | 2  |
| 12 |                |                 | R        | 175.11896      | 88.06312        | 1  |

Extracted from: Z:\712AB\SK17-S (Ac)\Chichi-Abaumannii-SK17-S-Acetyl\_DrWu\_20140703.raw #16051 RT: 45.68  
 ITMS, CID@35.00, z=+2, Mono m/z=767.89758 Da, MH+=1534.78789 Da, Match Tol.=0.6 Da

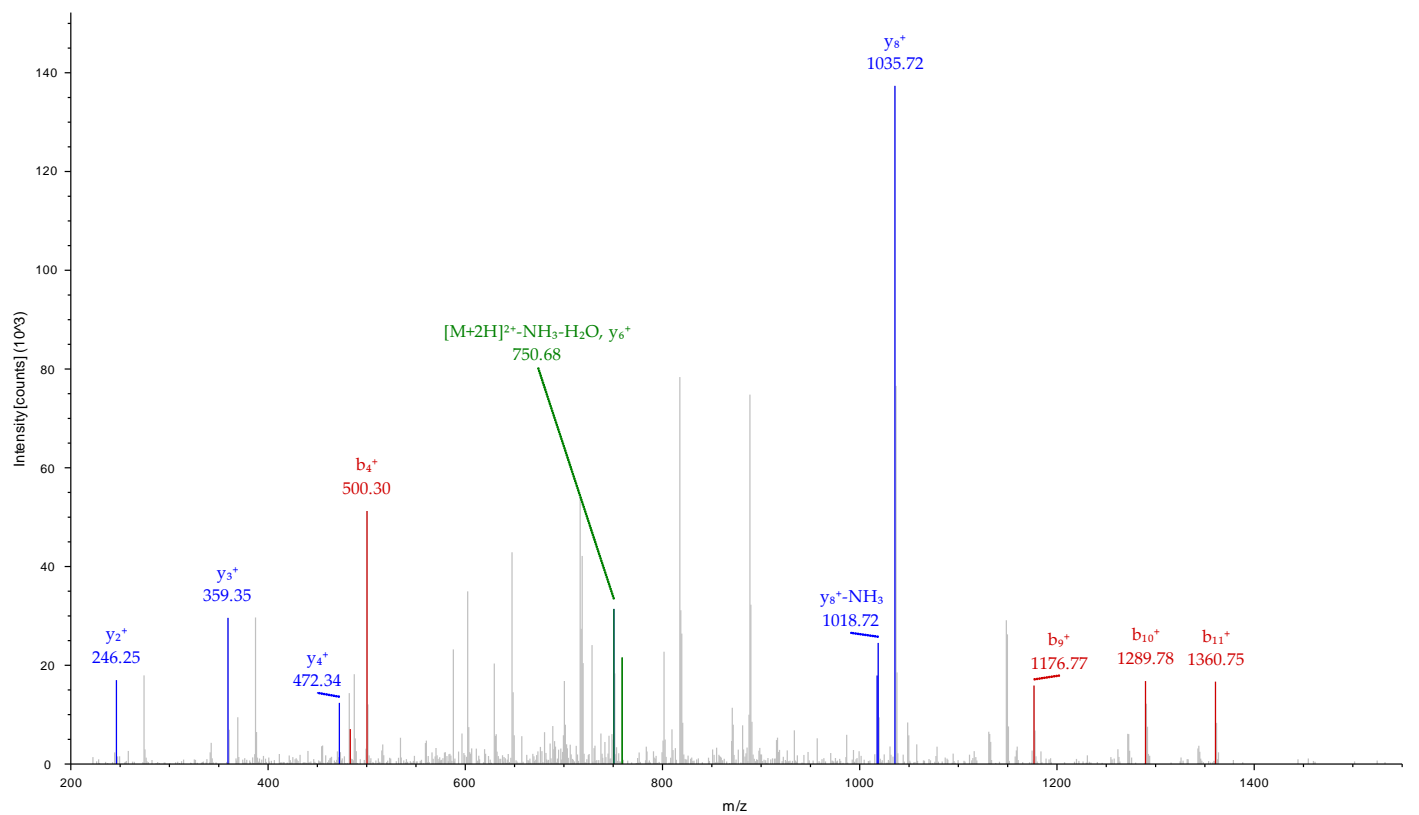

| #1 | b <sup>+</sup> | b <sup>2+</sup> | Seq.     | y <sup>+</sup> | y <sup>2+</sup> | #2 |
|----|----------------|-----------------|----------|----------------|-----------------|----|
| 1  | 114.09135      | 57.54931        | L        |                |                 | 23 |
| 2  | 227.17542      | 114.09135       | I        | 2555.53648     | 1278.27188      | 22 |
| 3  | 374.24384      | 187.62556       | F        | 2442.45241     | 1221.72984      | 21 |
| 4  | 487.32791      | 244.16759       | L        | 2295.38399     | 1148.19563      | 20 |
| 5  | 558.36503      | 279.68615       | A        | 2182.29992     | 1091.65360      | 19 |
| 6  | 659.41271      | 330.20999       | T        | 2111.26280     | 1056.13504      | 18 |
| 7  | 772.49678      | 386.75203       | I        | 2010.21512     | 1005.61120      | 17 |
| 8  | 829.51825      | 415.26276       | G        | 1897.13105     | 949.06916       | 16 |
| 9  | 928.58667      | 464.79697       | V        | 1840.10958     | 920.55843       | 15 |
| 10 | 1041.67074     | 521.33901       | I        | 1741.04116     | 871.02422       | 14 |
| 11 | 1188.73916     | 594.87322       | F        | 1627.95709     | 814.48218       | 13 |
| 12 | 1301.82323     | 651.41525       | L        | 1480.88867     | 740.94797       | 12 |
| 13 | 1414.90730     | 707.95729       | I        | 1367.80460     | 684.40594       | 11 |
| 14 | 1515.95498     | 758.48113       | T        | 1254.72053     | 627.86390       | 10 |
| 15 | 1586.99210     | 793.99969       | A        | 1153.67285     | 577.34006       | 9  |
| 16 | 1750.05542     | 875.53135       | Y        | 1082.63573     | 541.82150       | 8  |
| 17 | 1837.08745     | 919.04736       | S        | 919.57241      | 460.28984       | 7  |
| 18 | 1993.18857     | 997.09792       | R        | 832.54038      | 416.77383       | 6  |
| 19 | 2106.27264     | 1053.63996      | L        | 676.43926      | 338.72327       | 5  |
| 20 | 2276.37817     | 1138.69272      | K-Acetyl | 563.35519      | 282.18123       | 4  |
| 21 | 2375.44659     | 1188.22693      | V        | 393.24965      | 197.12846       | 3  |
| 22 | 2522.51501     | 1261.76114      | F        | 294.18123      | 147.59425       | 2  |
| 23 |                |                 | K        | 147.11281      | 74.06004        | 1  |

Extracted from: Z:\V12AB\SK17-S (Ac)\Chichi-Abaumannii-SK17-S-Acetyl\_DrWu\_20140703.raw #29828 RT: 83.12  
 ITMS, CID@35.00, z=+2, Mono m/z=1334.81592 Da, MH+=2668.62456 Da, Match Tol.=0.6 Da

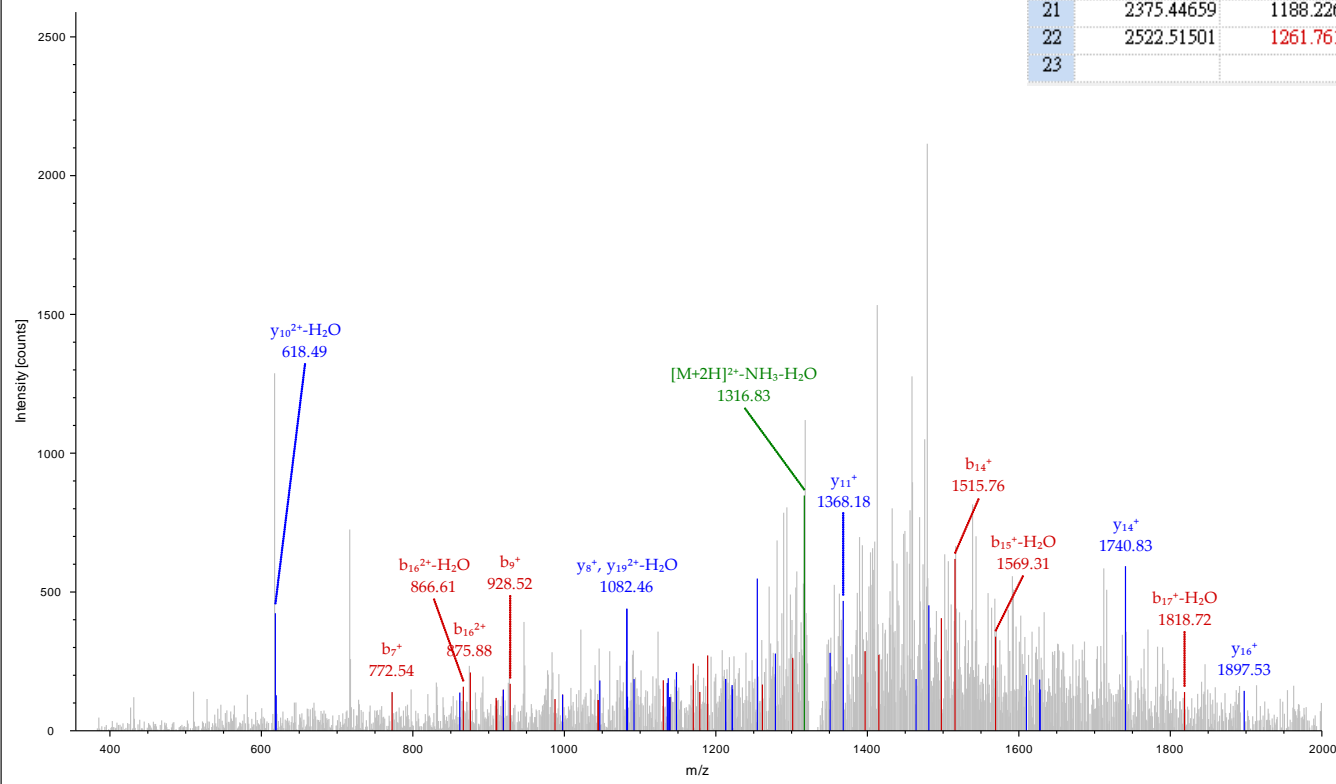

peg.369 28738

| #1 | b <sup>+</sup> | b <sup>2+</sup> | Seq.     | y <sup>+</sup> | y <sup>2+</sup> | #2 |
|----|----------------|-----------------|----------|----------------|-----------------|----|
| 1  | 158.04479      | 79.52603        | D-Acetyl |                |                 | 13 |
| 2  | 245.07682      | 123.04205       | S        | 1430.82138     | 715.91433       | 12 |
| 3  | 332.10885      | 166.55806       | S        | 1343.78935     | 672.39831       | 11 |
| 4  | 445.19292      | 223.10010       | L        | 1256.75732     | 628.88230       | 10 |
| 5  | 532.22495      | 266.61611       | S        | 1143.67325     | 572.34026       | 9  |
| 6  | 660.31992      | 330.66360       | K        | 1056.64122     | 528.82425       | 8  |
| 7  | 789.36252      | 395.18490       | E        | 928.54625      | 464.77676       | 7  |
| 8  | 917.42110      | 459.21419       | Q        | 799.50365      | 400.25546       | 6  |
| 9  | 1045.47968     | 523.24348       | Q        | 671.44507      | 336.22617       | 5  |
| 10 | 1215.58522     | 608.29625       | K-Acetyl | 543.38649      | 272.19688       | 4  |
| 11 | 1328.66929     | 664.83828       | L        | 373.28095      | 187.14411       | 3  |
| 12 | 1441.75336     | 721.38032       | L        | 260.19688      | 130.60208       | 2  |
| 13 |                |                 | K        | 147.11281      | 74.06004        | 1  |

Extracted from: Z:\712AB\SK17-S (Ac)\Chichi-Abaumannii-SK17-S-Acetyl\_DrWu\_20140703.raw #28738 RT: 79.55  
 ITMS, CID@35.00, z=+2, Mono m/z=794.43927 Da, MH+=1587.87126 Da, Match Tol.=0.6 Da

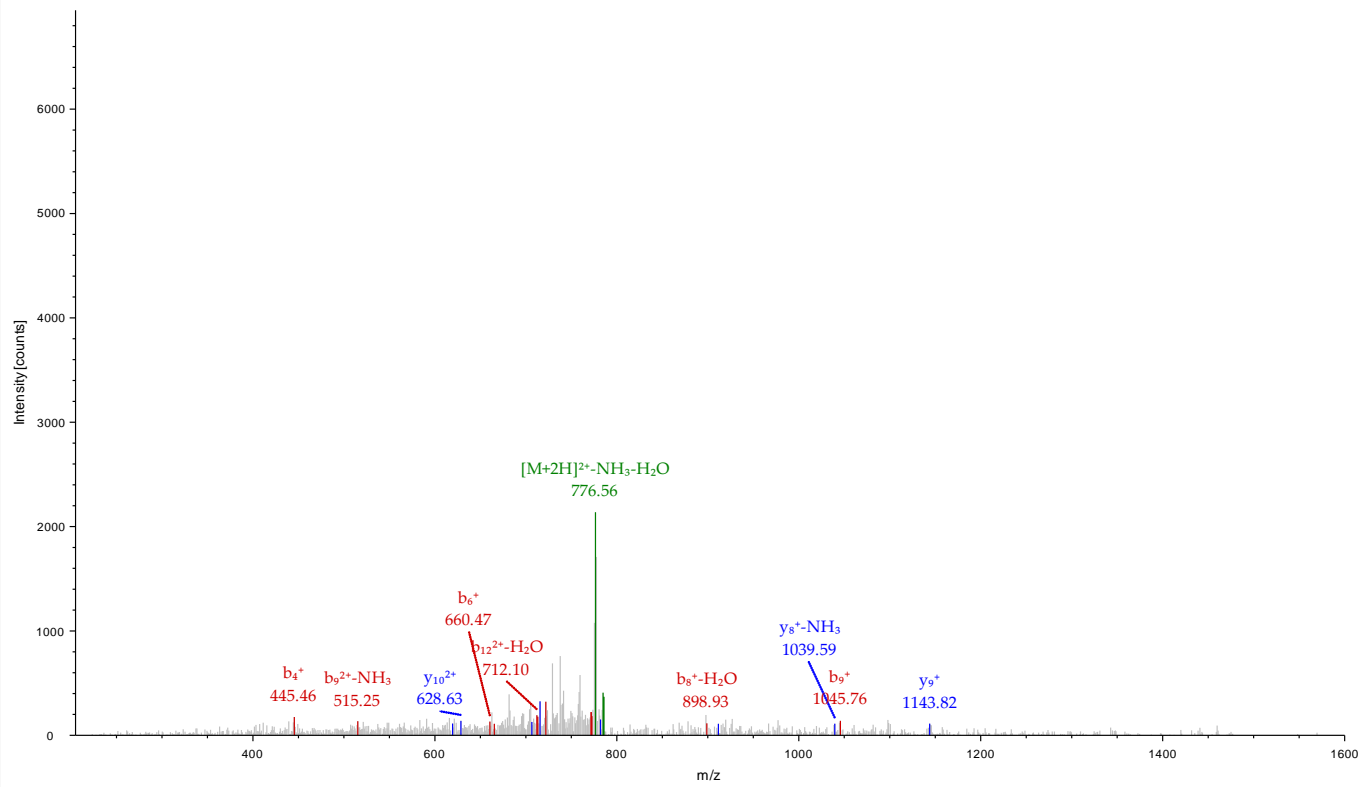

peg.376 22207

| #1 | b <sup>+</sup> | b <sup>2+</sup> | b <sup>3+</sup> | Seq.     | y <sup>+</sup> | y <sup>2+</sup> | y <sup>3+</sup> | #2 |
|----|----------------|-----------------|-----------------|----------|----------------|-----------------|-----------------|----|
| 1  | 129.06586      | 65.03657        | 43.69347        | Q        |                |                 |                 | 18 |
| 2  | 258.10846      | 129.55787       | 86.70767        | E        | 1898.92774     | 949.96751       | 633.64743       | 17 |
| 3  | 329.14558      | 165.07643       | 110.38671       | A        | 1769.88514     | 885.44621       | 590.63323       | 16 |
| 4  | 443.18851      | 222.09789       | 148.40102       | N        | 1698.84802     | 849.92765       | 566.95419       | 15 |
| 5  | 530.22054      | 265.61391       | 177.41170       | S        | 1584.80509     | 792.90618       | 528.93988       | 14 |
| 6  | 633.22973      | 317.11850       | 211.74809       | C        | 1497.77306     | 749.39017       | 499.92920       | 13 |
| 7  | 720.26176      | 360.63452       | 240.75877       | S        | 1394.76387     | 697.88557       | 465.59281       | 12 |
| 8  | 890.36729      | 445.68728       | 297.46061       | K-Acetyl | 1307.73184     | 654.36956       | 436.58213       | 11 |
| 9  | 987.42006      | 494.21367       | 329.81154       | P        | 1137.62631     | 569.31679       | 379.88029       | 10 |
| 10 | 1086.48848     | 543.74788       | 362.83434       | V        | 1040.57354     | 520.79041       | 347.52936       | 9  |
| 11 | 1185.55690     | 593.28209       | 395.85715       | V        | 941.50512      | 471.25620       | 314.50656       | 8  |
| 12 | 1314.59950     | 657.80339       | 438.87135       | E        | 842.43670      | 421.72199       | 281.48375       | 7  |
| 13 | 1428.64243     | 714.82485       | 476.88566       | N        | 713.39410      | 357.20069       | 238.46955       | 6  |
| 14 | 1598.74797     | 799.87762       | 533.58751       | K-Acetyl | 599.35117      | 300.17922       | 200.45524       | 5  |
| 15 | 1712.79090     | 856.89909       | 571.60182       | N        | 429.24563      | 215.12645       | 143.75339       | 4  |
| 16 | 1783.82802     | 892.41765       | 595.28086       | A        | 315.20270      | 158.10499       | 105.73908       | 3  |
| 17 | 1880.88079     | 940.94403       | 627.63178       | P        | 244.16558      | 122.58643       | 82.06004        | 2  |
| 18 |                |                 |                 | K        | 147.11281      | 74.06004        | 49.70912        | 1  |

Extracted from: Z:\712AB\SK17-S (Ac)\Chichi-Abaumannii-SK17-R-Acetyl\_DrWu\_20140512.raw #22207 RT: 63.08  
ITMS, CID@35.00, z=+3, Mono m/z=676.33344 Da, MH+=2026.98575 Da, Match Tol.=0.6 Da

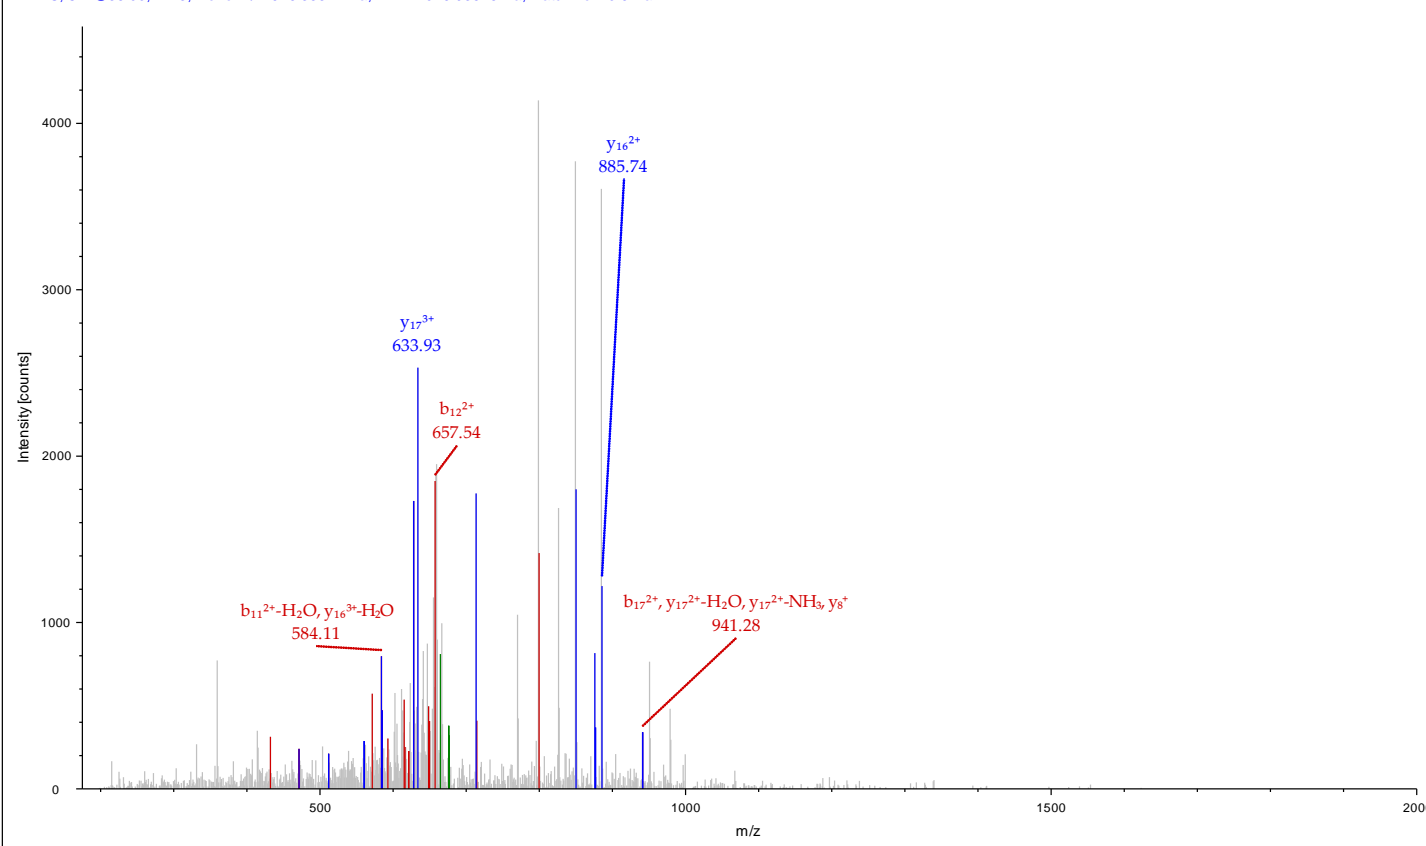



peg.383

13297

| #1 | b <sup>+</sup> | b <sup>2+</sup> | b <sup>3+</sup> | b <sup>4+</sup> | Seq.     | y <sup>+</sup> | y <sup>2+</sup> | y <sup>3+</sup> | y <sup>4+</sup> | #2 |
|----|----------------|-----------------|-----------------|-----------------|----------|----------------|-----------------|-----------------|-----------------|----|
| 1  | 130.04988      | 65.52858        | 44.02148        | 33.26793        | E        |                |                 |                 |                 | 23 |
| 2  | 231.09756      | 116.05242       | 77.70404        | 58.52985        | T        | 2744.39038     | 1372.69883      | 915.46831       | 686.85305       | 22 |
| 3  | 344.18163      | 172.59445       | 115.39873       | 86.80086        | L        | 2643.34270     | 1322.17499      | 881.78575       | 661.59113       | 21 |
| 4  | 473.22423      | 237.11575       | 158.41293       | 119.06151       | E        | 2530.25863     | 1265.63295      | 844.09106       | 633.32011       | 20 |
| 5  | 636.28755      | 318.64741       | 212.76737       | 159.82734       | Y        | 2401.21603     | 1201.11165      | 801.07686       | 601.05946       | 19 |
| 6  | 773.34646      | 387.17687       | 258.45367       | 194.09207       | H        | 2238.15271     | 1119.57999      | 746.72242       | 560.29363       | 18 |
| 7  | 910.40537      | 455.70632       | 304.13997       | 228.35680       | H        | 2101.09380     | 1051.05054      | 701.03612       | 526.02891       | 17 |
| 8  | 1025.43232     | 513.21980       | 342.48229       | 257.11354       | D        | 1964.03489     | 982.52108       | 655.34981       | 491.76418       | 16 |
| 9  | 1195.53785     | 598.27256       | 399.18413       | 299.63992       | K-Acetyl | 1849.00794     | 925.00761       | 617.00750       | 463.00744       | 15 |
| 10 | 1332.59676     | 666.80202       | 444.87044       | 333.90465       | H        | 1678.90240     | 839.95484       | 560.30565       | 420.48106       | 14 |
| 11 | 1469.65567     | 735.33147       | 490.55674       | 368.16938       | H        | 1541.84349     | 771.42538       | 514.61935       | 386.21633       | 13 |
| 12 | 1583.69860     | 792.35294       | 528.57105       | 396.68011       | N        | 1404.78458     | 702.89593       | 468.93304       | 351.95160       | 12 |
| 13 | 1684.74628     | 842.87678       | 562.25361       | 421.94203       | T        | 1290.74165     | 645.87446       | 430.91873       | 323.44087       | 11 |
| 14 | 1847.80960     | 924.40844       | 616.60805       | 462.70786       | Y        | 1189.69397     | 595.35062       | 397.23617       | 298.17895       | 10 |
| 15 | 1946.87802     | 973.94265       | 649.63086       | 487.47496       | V        | 1026.63065     | 513.81896       | 342.88173       | 257.41312       | 9  |
| 16 | 2045.94644     | 1023.47686      | 682.65366       | 512.24207       | V        | 927.56223      | 464.28475       | 309.85893       | 232.64602       | 8  |
| 17 | 2159.98937     | 1080.49832      | 720.66797       | 540.75280       | N        | 828.49381      | 414.75054       | 276.83612       | 207.87891       | 7  |
| 18 | 2273.07344     | 1137.04036      | 758.36266       | 569.02382       | L        | 714.45088      | 357.72908       | 238.82181       | 179.36818       | 6  |
| 19 | 2387.11637     | 1194.06182      | 796.37697       | 597.53455       | N        | 601.36681      | 301.18704       | 201.12712       | 151.09716       | 5  |
| 20 | 2501.15930     | 1251.08329      | 834.39128       | 626.04528       | N        | 487.32388      | 244.16558       | 163.11281       | 122.58643       | 4  |
| 21 | 2614.24337     | 1307.62532      | 872.08597       | 654.31630       | L        | 373.28095      | 187.14411       | 125.09850       | 94.07570        | 3  |
| 22 | 2727.32744     | 1364.16736      | 909.78066       | 682.58732       | I        | 260.19688      | 130.60208       | 87.40381        | 65.80468        | 2  |
| 23 |                |                 |                 |                 | K        | 147.11281      | 74.06004        | 49.70912        | 37.53366        | 1  |

Extracted from: Z:\712AB\SK17-S (Ac)Chichi-Abaumanii-SK17-S-Acetyl\_DrWu\_20140512.raw #13297 RT: 43.20  
 ITMS, CID@35.00, z=+4, Mono m/z=719.11230 Da, MH+=2873.42739 Da, Match Tol.=0.6 Da

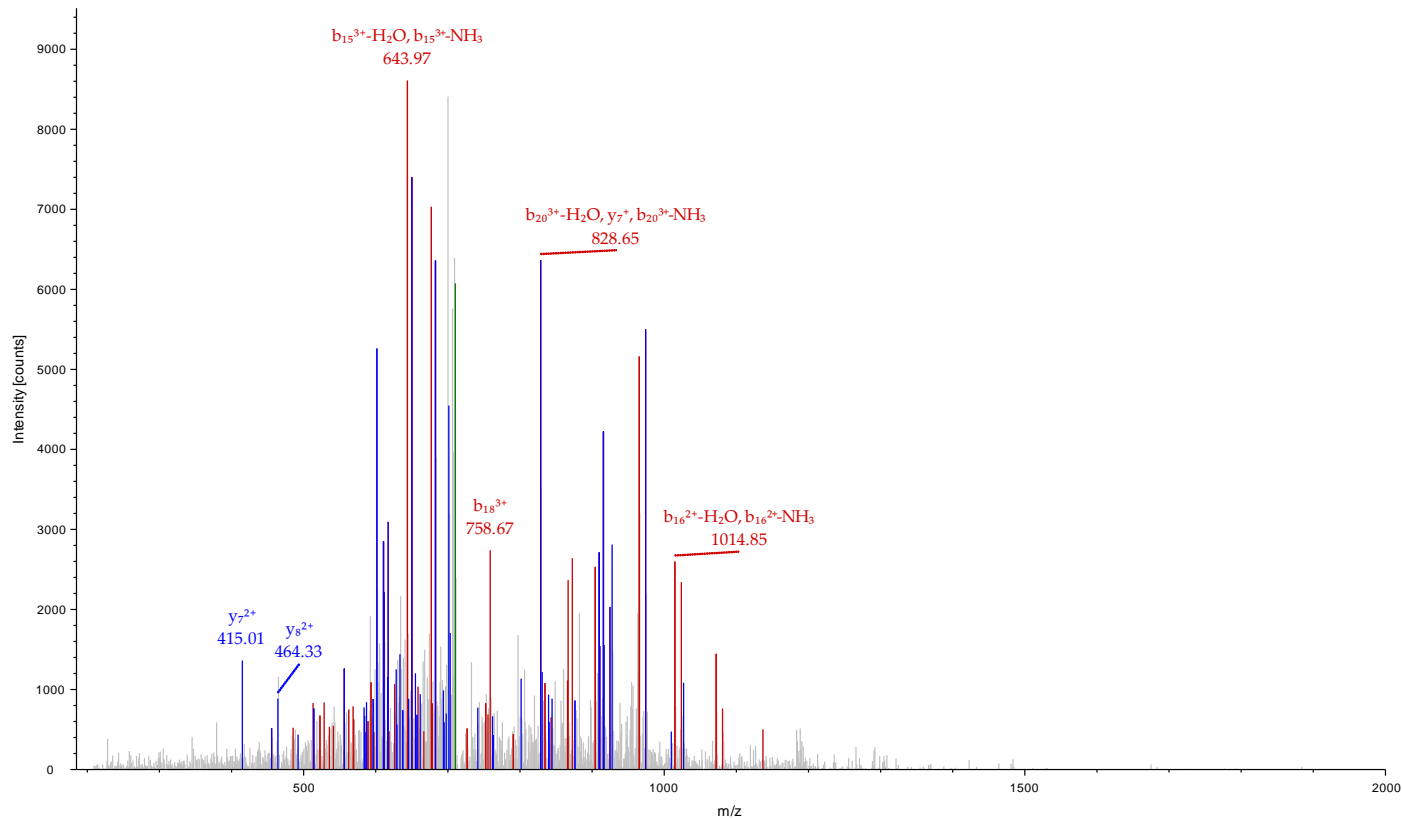

peg.412 14215

| #1 | b <sup>+</sup> | b <sup>2+</sup> | Seq.     | y <sup>+</sup> | y <sup>2+</sup> | #2 |
|----|----------------|-----------------|----------|----------------|-----------------|----|
| 1  | 130.04988      | 65.52858        | E        |                |                 | 13 |
| 2  | 277.11830      | 139.06279       | F        | 1408.72202     | 704.86465       | 12 |
| 3  | 424.18672      | 212.59700       | F        | 1261.65360     | 631.33044       | 11 |
| 4  | 481.20819      | 241.10773       | G        | 1114.58518     | 557.79623       | 10 |
| 5  | 552.24531      | 276.62629       | A        | 1057.56371     | 529.28549       | 9  |
| 6  | 651.31373      | 326.16050       | V        | 986.52659      | 493.76693       | 8  |
| 7  | 766.34068      | 383.67398       | D        | 887.45817      | 444.23272       | 7  |
| 8  | 936.44621      | 468.72674       | K-Acetyl | 772.43122      | 386.71925       | 6  |
| 9  | 993.46768      | 497.23748       | G        | 602.32568      | 301.66648       | 5  |
| 10 | 1106.55175     | 553.77951       | I        | 545.30421      | 273.15574       | 4  |
| 11 | 1234.61033     | 617.80880       | Q        | 432.22014      | 216.61371       | 3  |
| 12 | 1363.65293     | 682.33010       | E        | 304.16156      | 152.58442       | 2  |
| 13 |                |                 | R        | 175.11896      | 88.06312        | 1  |

Extracted from: Z:\712AB\SK17-S (Ac)\Chichi-Abaumanni-SK17-S-Acetyl\_DrWu\_20140512.raw #14215 RT: 45.56  
 ITMS, CID@35.00, z=+2, Mono m/z=769.38538 Da, MH+=1537.76348 Da, Match Tol.=0.6 Da

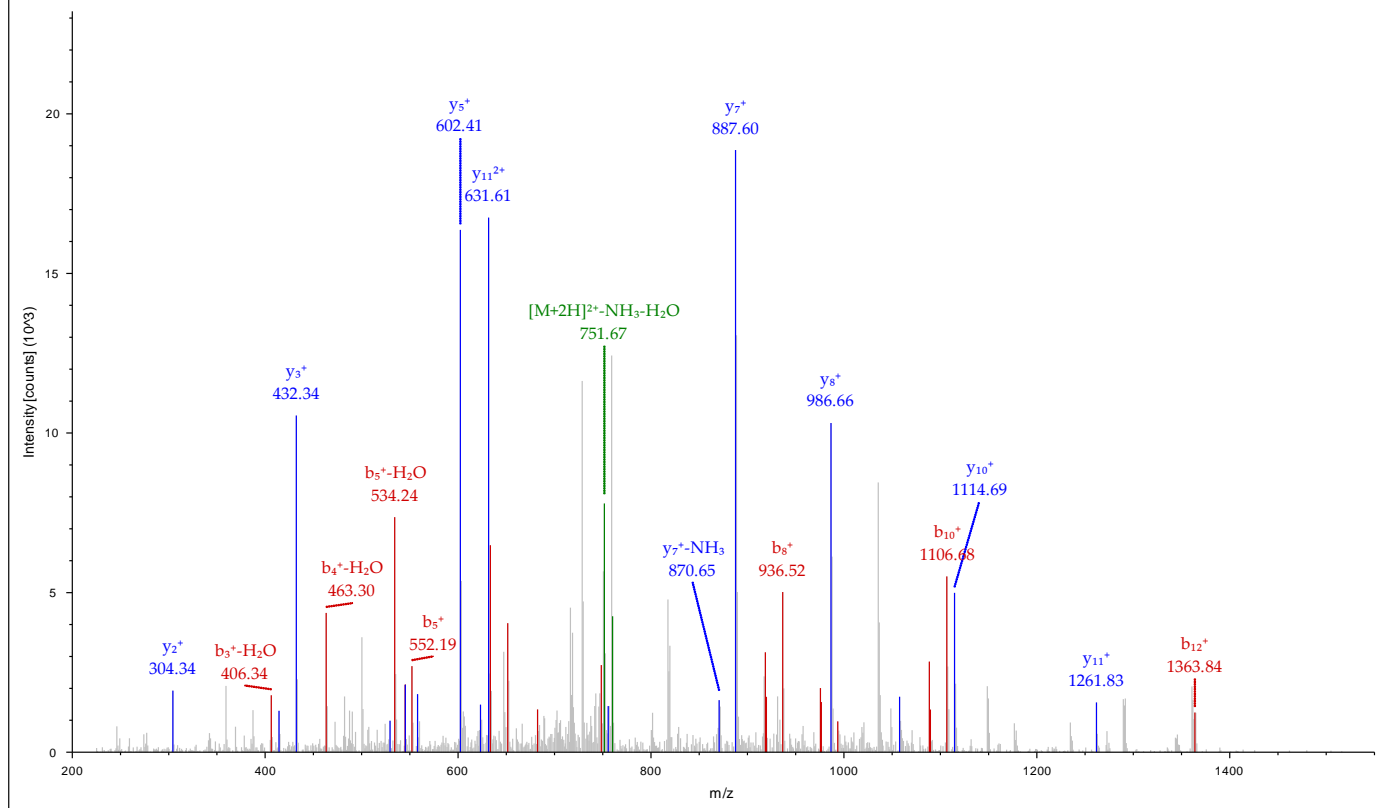

peg.451 24886

| #1 | b <sup>+</sup> | b <sup>2+</sup> | Seq.     | y <sup>+</sup> | y <sup>2+</sup> | #2 |
|----|----------------|-----------------|----------|----------------|-----------------|----|
| 1  | 100.07570      | 50.54149        | V        |                |                 | 15 |
| 2  | 199.14412      | 100.07570       | V        | 1716.94325     | 858.97526       | 14 |
| 3  | 346.21254      | 173.60991       | F        | 1617.87483     | 809.44105       | 13 |
| 4  | 417.24966      | 209.12847       | A        | 1470.80641     | 735.90684       | 12 |
| 5  | 530.33373      | 265.67050       | L        | 1399.76929     | 700.38828       | 11 |
| 6  | 645.36068      | 323.18398       | D        | 1286.68522     | 643.84625       | 10 |
| 7  | 746.40836      | 373.70782       | T        | 1171.65827     | 586.33277       | 9  |
| 8  | 916.51389      | 458.76058       | K-Acetyl | 1070.61059     | 535.80893       | 8  |
| 9  | 973.53536      | 487.27132       | G        | 900.50505      | 450.75616       | 7  |
| 10 | 1101.59394     | 551.30061       | Q        | 843.48358      | 422.24543       | 6  |
| 11 | 1229.65252     | 615.32990       | Q        | 715.42500      | 358.21614       | 5  |
| 12 | 1415.73184     | 708.36956       | W        | 587.36642      | 294.18685       | 4  |
| 13 | 1528.81591     | 764.91159       | L        | 401.28710      | 201.14719       | 3  |
| 14 | 1641.89998     | 821.45363       | L        | 288.20303      | 144.60515       | 2  |
| 15 |                |                 | R        | 175.11896      | 88.06312        | 1  |

Extracted from: Z:\712AB\ISK17-S (Ac)\Chichi-Abaumanni-SK17-S-Acetyl\_DrWu\_20140703.raw #24886 RT: 67.99  
 ITMS, CID@35.00, z=+2, Mono m/z=908.50598 Da, MH+=1816.00469 Da, Match Tol.=0.6 Da

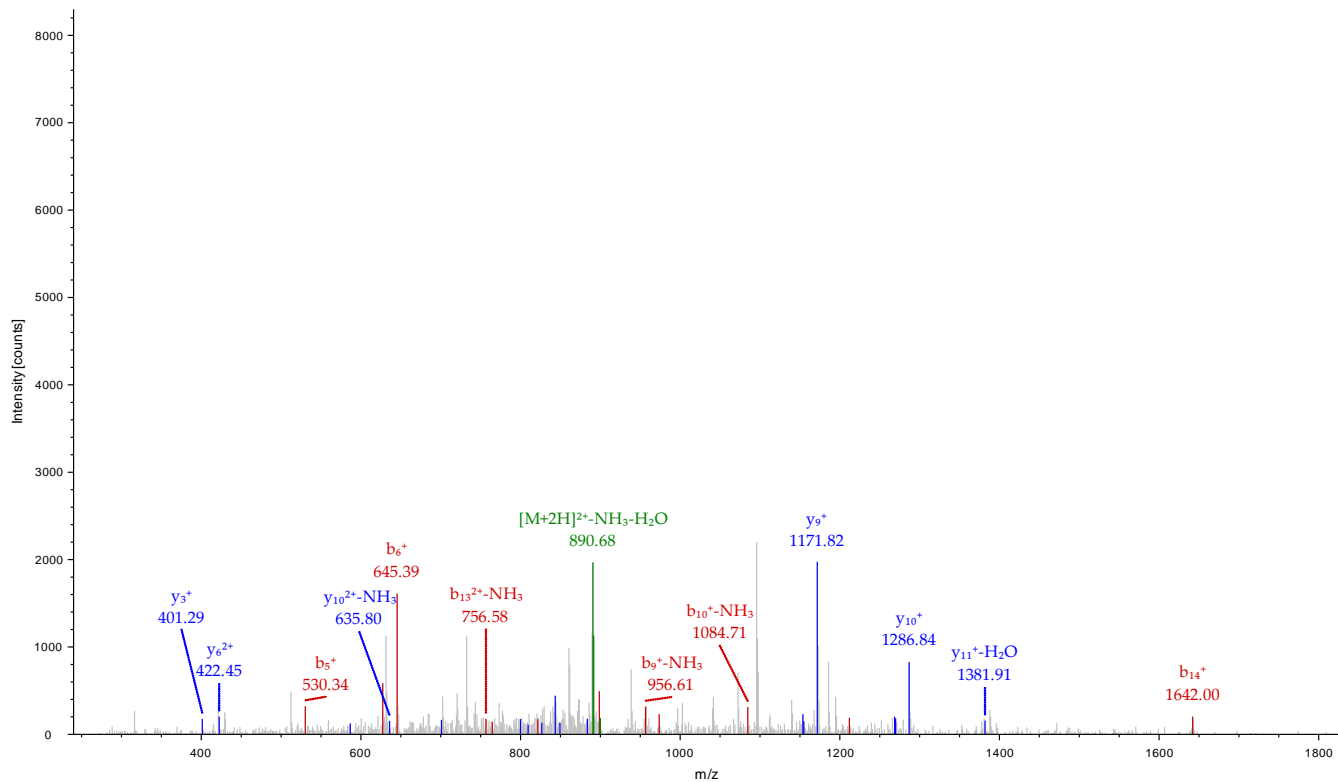

peg.452 27944

| #1 | b <sup>+</sup> | b <sup>2+</sup> | b <sup>3+</sup> | Seq.     | y <sup>+</sup> | y <sup>2+</sup> | y <sup>3+</sup> | #2 |
|----|----------------|-----------------|-----------------|----------|----------------|-----------------|-----------------|----|
| 1  | 102.05496      | 51.53112        | 34.68984        | T        |                |                 |                 | 28 |
| 2  | 159.07643      | 80.04185        | 53.69699        | G        | 2674.36186     | 1337.68457      | 892.12547       | 27 |
| 3  | 258.14485      | 129.57606       | 86.71980        | V        | 2617.34039     | 1309.17383      | 873.11831       | 26 |
| 4  | 371.22892      | 186.11810       | 124.41449       | L        | 2518.27197     | 1259.63962      | 840.09551       | 25 |
| 5  | 442.26604      | 221.63666       | 148.09353       | A        | 2405.18790     | 1203.09759      | 802.40082       | 24 |
| 6  | 556.30897      | 278.65812       | 186.10784       | N        | 2334.15078     | 1167.57903      | 778.72178       | 23 |
| 7  | 693.36788      | 347.18758       | 231.79414       | H        | 2220.10785     | 1110.55756      | 740.70747       | 22 |
| 8  | 824.40838      | 412.70783       | 275.47431       | M        | 2083.04894     | 1042.02811      | 695.02116       | 21 |
| 9  | 953.45098      | 477.22913       | 318.48851       | E        | 1952.00844     | 976.50786       | 651.34100       | 20 |
| 10 | 1010.47245     | 505.73986       | 337.49567       | G        | 1822.96584     | 911.98656       | 608.32680       | 19 |
| 11 | 1180.57798     | 590.79263       | 394.19751       | K-Acetyl | 1765.94437     | 883.47582       | 589.31964       | 18 |
| 12 | 1267.61001     | 634.30864       | 423.20819       | S        | 1595.83883     | 798.42305       | 532.61779       | 17 |
| 13 | 1324.63148     | 662.81938       | 442.21534       | G        | 1508.80680     | 754.90704       | 503.60712       | 16 |
| 14 | 1437.71555     | 719.36141       | 479.91003       | L        | 1451.78533     | 726.39630       | 484.59966       | 15 |
| 15 | 1494.73702     | 747.87215       | 498.91719       | G        | 1338.70126     | 669.85427       | 446.90527       | 14 |
| 16 | 1581.76905     | 791.38816       | 527.92787       | S        | 1281.67979     | 641.34353       | 427.89811       | 13 |
| 17 | 1694.85312     | 847.93020       | 565.62256       | L        | 1194.64776     | 597.82752       | 398.88744       | 12 |
| 18 | 1781.88515     | 891.44621       | 594.63323       | S        | 1081.56369     | 541.28548       | 361.19275       | 11 |
| 19 | 1868.91718     | 934.96223       | 623.64391       | S        | 994.53166      | 497.76947       | 332.18207       | 10 |
| 20 | 1955.94921     | 978.47824       | 652.65459       | S        | 907.49963      | 454.25345       | 303.17139       | 9  |
| 21 | 2055.01763     | 1028.01245      | 685.67739       | V        | 820.46760      | 410.73744       | 274.16072       | 8  |
| 22 | 2168.10170     | 1084.55449      | 723.37208       | L        | 721.39918      | 361.20323       | 241.13791       | 7  |
| 23 | 2267.17012     | 1134.08870      | 756.39489       | V        | 608.31511      | 304.66119       | 203.44322       | 6  |
| 24 | 2395.22870     | 1198.11799      | 799.08108       | Q        | 509.24669      | 255.12698       | 170.42041       | 5  |
| 25 | 2532.28761     | 1266.64744      | 844.76739       | H        | 381.18811      | 191.09769       | 127.73422       | 4  |
| 26 | 2603.32473     | 1302.16600      | 868.44643       | A        | 244.12920      | 122.56824       | 82.04792        | 3  |
| 27 | 2700.37750     | 1350.69239      | 900.79735       | P        | 173.09208      | 87.04968        | 58.36888        | 2  |
| 28 |                |                 |                 | G        | 76.03931       | 38.52329        | 26.01795        | 1  |

Extracted from: Z:\712AB\SK17-S (Ac)\Chichi-Abaumannii-SK17-R-Acetyl\_DrWu\_20140703.raw #27944 RT: 76.65  
 ITMS, CID@35.00, z=+3, Mono m/z=925.81134 Da, MH+=2775.41947 Da, Match Tol.=0.6 Da

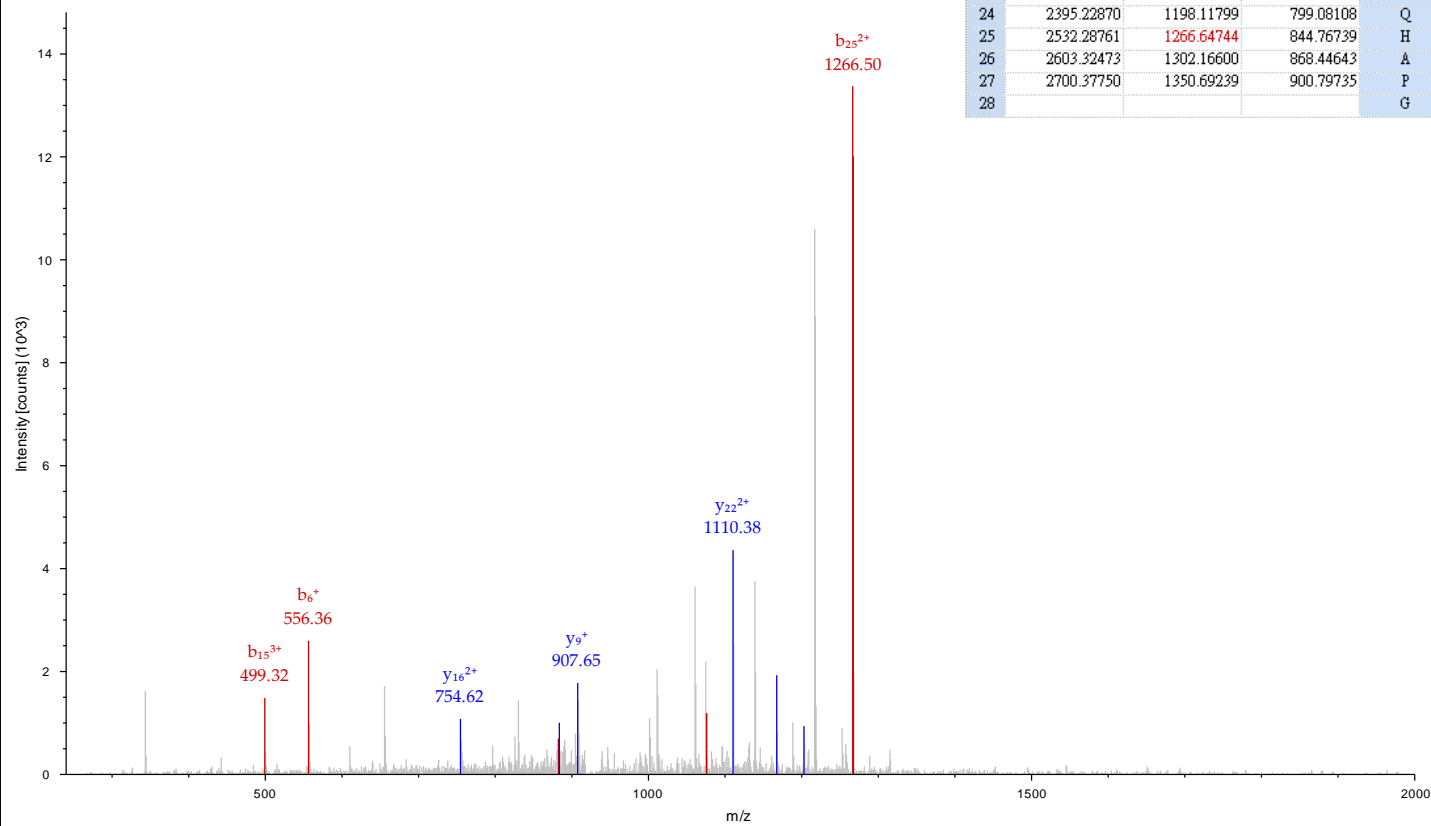

peg.519 14189

| #1 | b <sup>+</sup> | b <sup>2+</sup> | Seq.     | y <sup>+</sup> | y <sup>2+</sup> | #2 |
|----|----------------|-----------------|----------|----------------|-----------------|----|
| 1  | 114.05496      | 57.53112        | A-Acetyl |                |                 | 13 |
| 2  | 217.06415      | 109.03571       | C        | 1322.65222     | 661.82975       | 12 |
| 3  | 346.10675      | 173.55701       | E        | 1219.64303     | 610.32515       | 11 |
| 4  | 417.14387      | 209.07557       | A        | 1090.60043     | 545.80385       | 10 |
| 5  | 530.22794      | 265.61761       | L        | 1019.56331     | 510.28529       | 9  |
| 6  | 617.25997      | 309.13362       | S        | 906.47924      | 453.74326       | 8  |
| 7  | 731.30290      | 366.15509       | N        | 819.44721      | 410.22724       | 7  |
| 8  | 878.37132      | 439.68930       | F        | 705.40428      | 353.20578       | 6  |
| 9  | 935.39279      | 468.20003       | G        | 558.33586      | 279.67157       | 5  |
| 10 | 992.41426      | 496.71077       | G        | 501.31439      | 251.16083       | 4  |
| 11 | 1091.48268     | 546.24498       | V        | 444.29292      | 222.65010       | 3  |
| 12 | 1261.58822     | 631.29775       | K-Acetyl | 345.22450      | 173.11589       | 2  |
| 13 |                |                 | R        | 175.11896      | 88.06312        | 1  |

Extracted from: Z:\712AB\SK17-S (Ac)\Chichi-Abaumannii-SK17-S-Acetyl\_DrWu\_20140512.raw #14189 RT: 45.50  
 ITMS, CID@35.00, z=+2, Mono m/z=718.35583 Da, MH+=1435.70439 Da, Match Tol.=0.6 Da

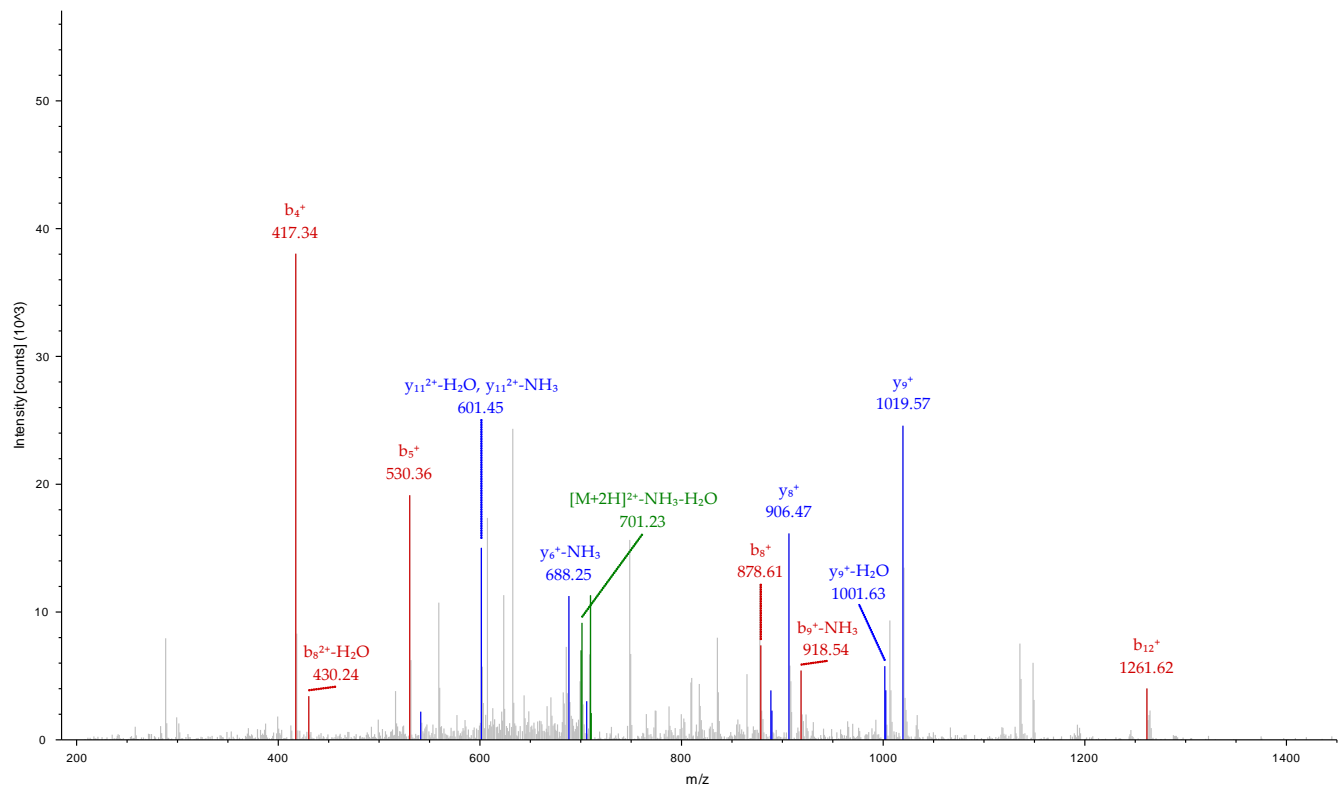

peg.522 29450

| #1 | b <sup>+</sup> | b <sup>2+</sup> | b <sup>3+</sup> | Seq.     | y <sup>+</sup> | y <sup>2+</sup> | y <sup>3+</sup> | #2 |
|----|----------------|-----------------|-----------------|----------|----------------|-----------------|-----------------|----|
| 1  | 148.07570      | 74.54149        | 50.03008        | F        |                |                 |                 | 18 |
| 2  | 261.15977      | 131.08352       | 87.72477        | L        | 2042.10168     | 1021.55448      | 681.37208       | 17 |
| 3  | 431.26530      | 216.13629       | 144.42662       | K-Acetyl | 1929.01761     | 965.01244       | 643.67739       | 16 |
| 4  | 488.28677      | 244.64702       | 163.43377       | G        | 1758.91207     | 879.95967       | 586.97554       | 15 |
| 5  | 616.34535      | 308.67631       | 206.11997       | Q        | 1701.89060     | 851.44894       | 567.96838       | 14 |
| 6  | 745.38795      | 373.19761       | 249.13417       | E        | 1573.83202     | 787.41965       | 525.28219       | 13 |
| 7  | 874.43055      | 437.71891       | 292.14837       | E        | 1444.78942     | 722.89835       | 482.26799       | 12 |
| 8  | 1003.47315     | 502.24021       | 335.16257       | E        | 1315.74682     | 658.37705       | 439.25379       | 11 |
| 9  | 1104.52083     | 552.76405       | 368.84513       | T        | 1186.70422     | 593.85575       | 396.23959       | 10 |
| 10 | 1218.56376     | 609.78552       | 406.85944       | N        | 1085.65654     | 543.33191       | 362.55703       | 9  |
| 11 | 1331.64783     | 666.32755       | 444.55413       | I        | 971.61361      | 486.31044       | 324.54272       | 8  |
| 12 | 1460.69043     | 730.84885       | 487.56833       | E        | 858.52954      | 429.76841       | 286.84803       | 7  |
| 13 | 1575.71738     | 788.36233       | 525.91064       | D        | 729.48694      | 365.24711       | 243.83383       | 6  |
| 14 | 1688.80145     | 844.90436       | 563.60533       | I        | 614.45999      | 307.73363       | 205.49151       | 5  |
| 15 | 1816.89642     | 908.95185       | 606.30366       | K        | 501.37592      | 251.19160       | 167.79682       | 4  |
| 16 | 1929.98049     | 965.49388       | 643.99835       | L        | 373.28095      | 187.14411       | 125.09850       | 3  |
| 17 | 2043.06456     | 1022.03592      | 681.69304       | L        | 260.19688      | 130.60208       | 87.40381        | 2  |
| 18 |                |                 |                 | K        | 147.11281      | 74.06004        | 49.70912        | 1  |

Extracted from: Z:\712AB\SK17-S (Ac)\Chichi-Abaumannii-SK17-S-Acetyl\_DrWu\_20140703.raw #29450 RT: 81.89  
 ITMS, CID@35.00, z=+3, Mono m/z=730.39832 Da, MH++=2189.18039 Da, Match Tol.=0.6 Da

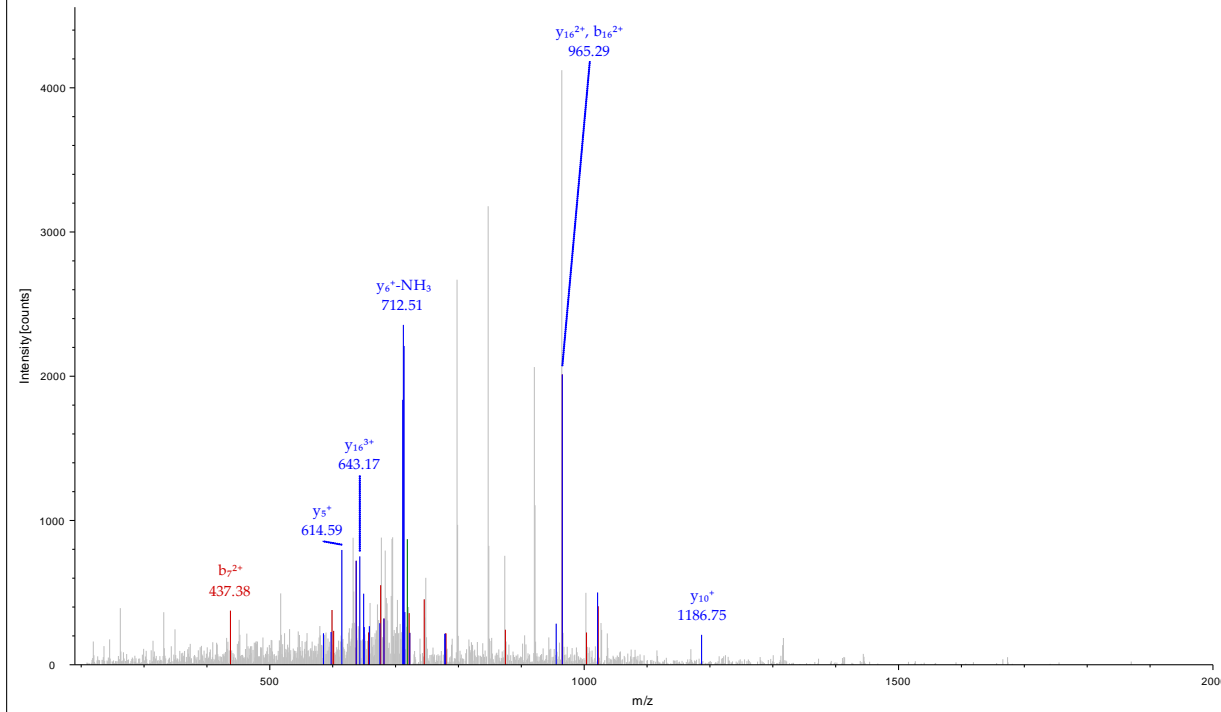

| #1 | b <sup>+</sup> | b <sup>2+</sup> | b <sup>3+</sup> | Seq.     | y <sup>+</sup> | y <sup>2+</sup> | y <sup>3+</sup> | #2 |
|----|----------------|-----------------|-----------------|----------|----------------|-----------------|-----------------|----|
| 1  | 88.03931       | 44.52329        | 30.01795        | S        |                |                 |                 | 23 |
| 2  | 203.06626      | 102.03677       | 68.36027        | D        | 2575.35159     | 1288.17943      | 859.12205       | 22 |
| 3  | 316.15033      | 158.57880       | 106.05496       | L        | 2460.32464     | 1230.66596      | 820.77973       | 21 |
| 4  | 445.19293      | 223.10010       | 149.06916       | E        | 2347.24057     | 1174.12392      | 783.08504       | 20 |
| 5  | 558.27700      | 279.64214       | 186.76385       | I        | 2218.19797     | 1109.60262      | 740.07084       | 19 |
| 6  | 657.34542      | 329.17635       | 219.78666       | V        | 2105.11390     | 1053.06059      | 702.37615       | 18 |
| 7  | 785.40400      | 393.20564       | 262.47285       | Q        | 2006.04548     | 1003.52638      | 669.35334       | 17 |
| 8  | 842.42547      | 421.71637       | 281.48001       | G        | 1877.98690     | 939.49709       | 626.66715       | 16 |
| 9  | 971.46807      | 486.23767       | 324.49421       | E        | 1820.96543     | 910.98635       | 607.65999       | 15 |
| 10 | 1085.51100     | 543.25914       | 362.50852       | N        | 1691.92283     | 846.46505       | 564.64579       | 14 |
| 11 | 1198.59507     | 599.80117       | 400.20321       | L        | 1577.87990     | 789.44359       | 526.63148       | 13 |
| 12 | 1311.67914     | 656.34321       | 437.89790       | L        | 1464.79583     | 732.90155       | 488.93679       | 12 |
| 13 | 1439.73772     | 720.37250       | 480.58409       | Q        | 1351.71176     | 676.35952       | 451.24210       | 11 |
| 14 | 1510.77484     | 755.89106       | 504.26313       | A        | 1223.65318     | 612.33023       | 408.55591       | 10 |
| 15 | 1673.83816     | 837.42272       | 558.61757       | Y        | 1152.61606     | 576.81167       | 384.87687       | 9  |
| 16 | 1820.90658     | 910.95693       | 607.64038       | F        | 989.55274      | 495.28001       | 330.52243       | 8  |
| 17 | 1891.94370     | 946.47549       | 631.31942       | A        | 842.48432      | 421.74580       | 281.49962       | 7  |
| 18 | 1978.97573     | 989.99150       | 660.33009       | S        | 771.44720      | 386.22724       | 257.82058       | 6  |
| 19 | 2076.02850     | 1038.51789      | 692.68102       | P        | 684.41517      | 342.71122       | 228.80991       | 5  |
| 20 | 2190.07143     | 1095.53935      | 730.69533       | N        | 587.36240      | 294.18484       | 196.45898       | 4  |
| 21 | 2360.17696     | 1180.59212      | 787.39717       | K-Acetyl | 473.31947      | 237.16337       | 158.44467       | 3  |
| 22 | 2488.27193     | 1244.63960      | 830.09549       | K        | 303.21393      | 152.11060       | 101.74283       | 2  |
| 23 |                |                 |                 | R        | 175.11896      | 88.06312        | 59.04450        | 1  |

Extracted from: Z:\712AB\SK17-S (Ac)\Chichi-Abaumannii-SK17-S-Acetyl\_DrWu\_20140703.raw #26277 RT: 71.95 ITMS, CID@35.00, z=+3, Mono m/z=888.13586 Da, MH+=2662.39304 Da, Match Tol.=0.6 Da

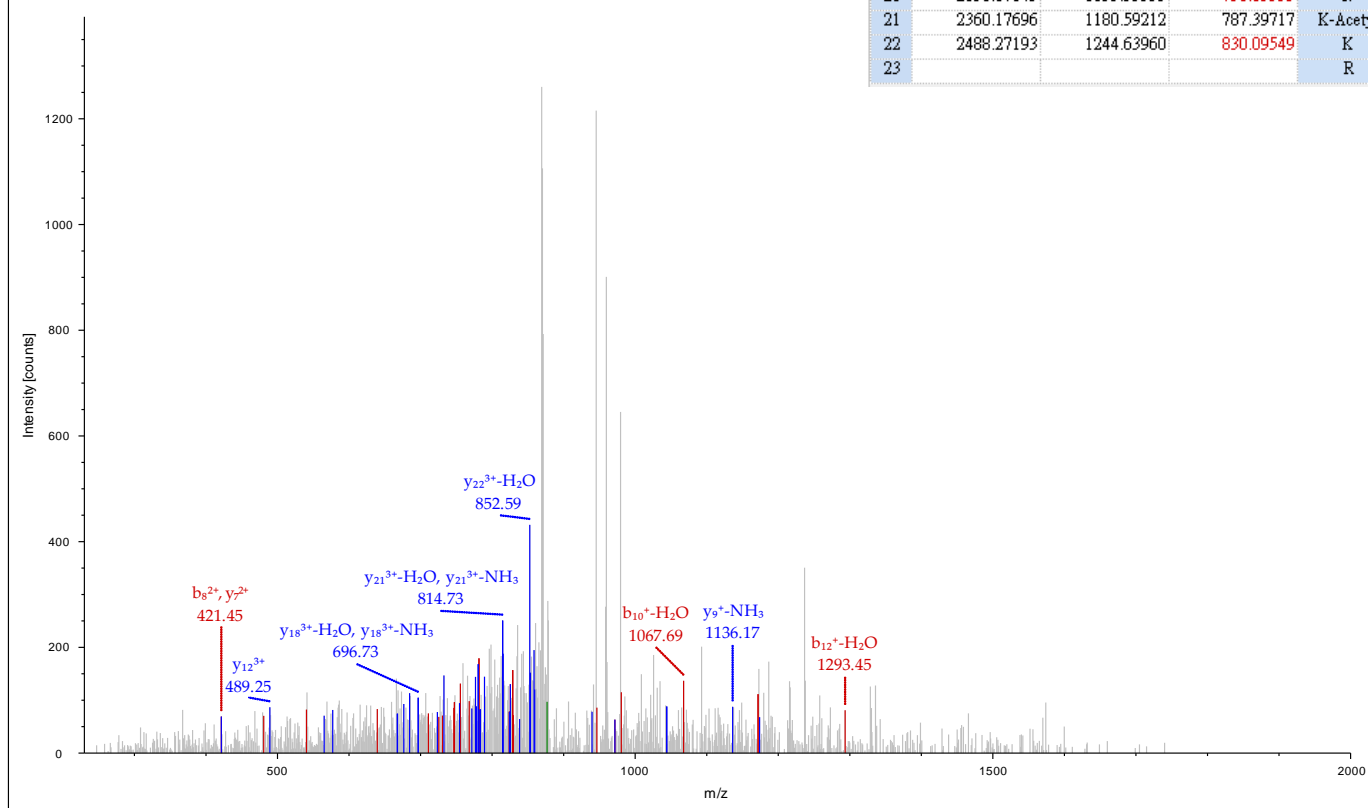

| #1 | b <sup>+</sup> | b <sup>2+</sup> | Seq.     | y <sup>+</sup> | y <sup>2+</sup> | #2 |
|----|----------------|-----------------|----------|----------------|-----------------|----|
| 1  | 100.07570      | 50.54149        | V        |                |                 | 6  |
| 2  | 229.11830      | 115.06279       | E        | 630.38214      | 315.69471       | 5  |
| 3  | 399.22383      | 200.11555       | K-Acetyl | 501.33954      | 251.17341       | 4  |
| 4  | 470.26095      | 235.63411       | A        | 331.23400      | 166.12064       | 3  |
| 5  | 583.34502      | 292.17615       | L        | 260.19688      | 130.60208       | 2  |
| 6  |                |                 | K        | 147.11281      | 74.06004        | 1  |

Extracted from: Z:\712AB\SK17-S (Ac)Chichi-Abaumannii-SK17-R-Acetyl\_DrWu\_20140512.raw #4982 RT: 19.60  
 ITMS, CID@35.00, z=+2, Mono m/z=365.22864 Da, MH+=729.45000 Da, Match Tol.=0.6 Da

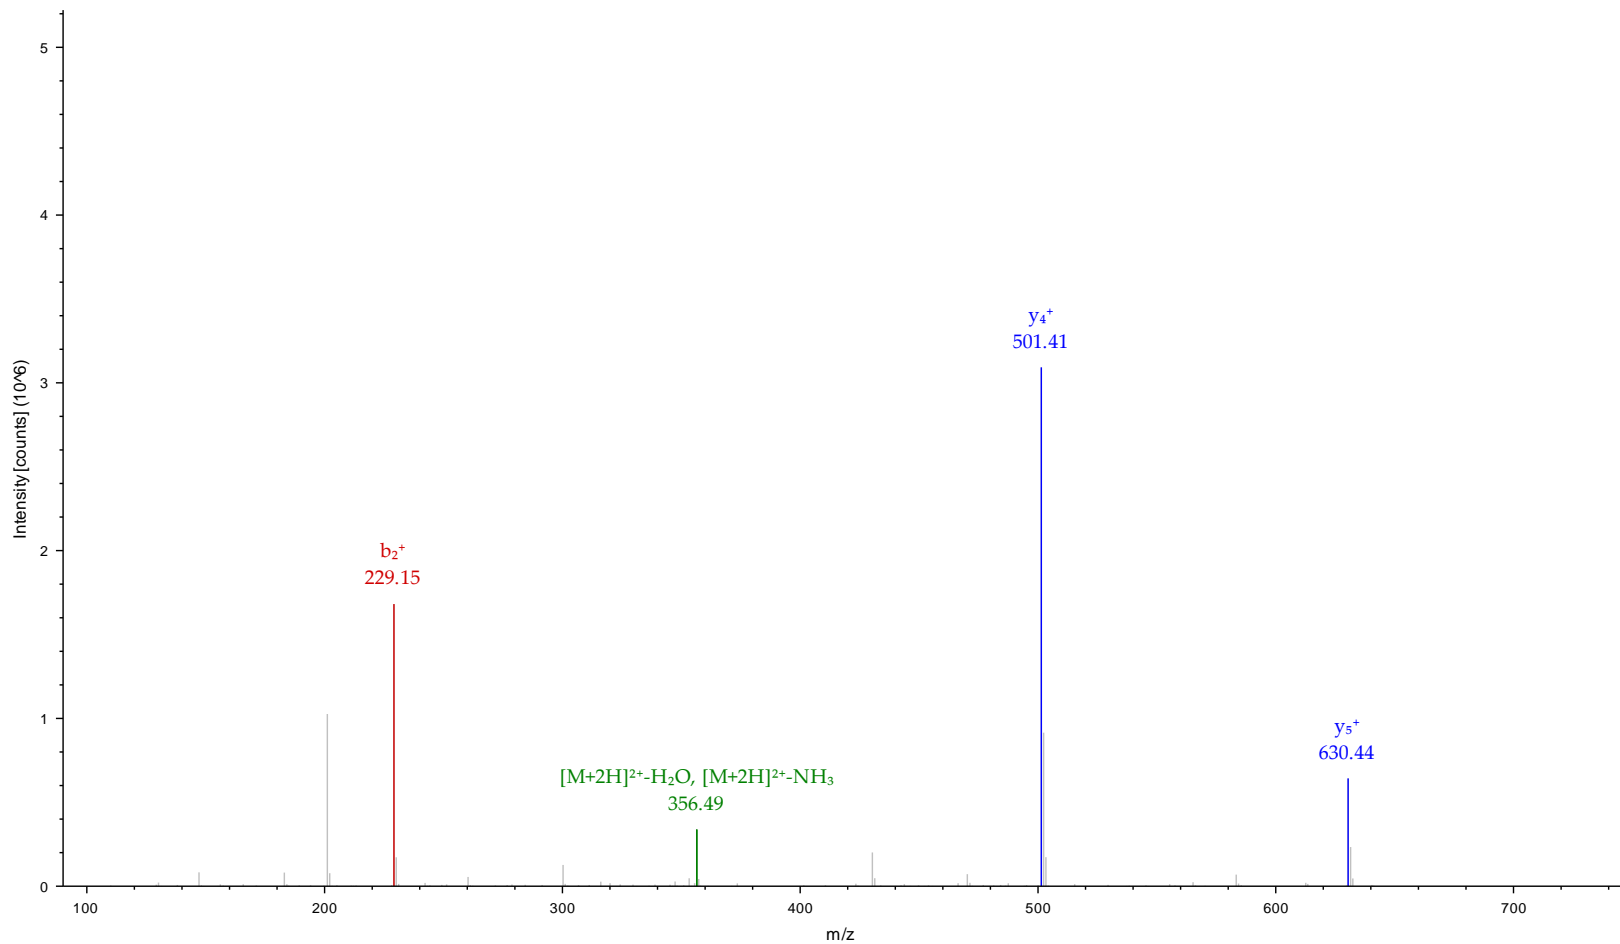



peg.564 20560

| #1 | b <sup>+</sup> | b <sup>2+</sup> | b <sup>3+</sup> | Seq.     | y <sup>+</sup> | y <sup>2+</sup> | y <sup>3+</sup> | #2 |
|----|----------------|-----------------|-----------------|----------|----------------|-----------------|-----------------|----|
| 1  | 148.07570      | 74.54149        | 50.03008        | F        |                |                 |                 | 18 |
| 2  | 249.12338      | 125.06533       | 83.71264        | T        | 2053.03498     | 1027.02113      | 685.01651       | 17 |
| 3  | 362.20745      | 181.60736       | 121.40733       | L        | 1951.98730     | 976.49729       | 651.33395       | 16 |
| 4  | 532.31298      | 266.66013       | 178.10918       | K-Acetyl | 1838.90323     | 919.95525       | 613.63926       | 15 |
| 5  | 646.35591      | 323.68159       | 216.12349       | N        | 1668.79769     | 834.90248       | 556.93741       | 14 |
| 6  | 717.39303      | 359.20015       | 239.80253       | A        | 1554.75476     | 777.88102       | 518.92310       | 13 |
| 7  | 880.45635      | 440.73181       | 294.15697       | Y        | 1483.71764     | 742.36246       | 495.24406       | 12 |
| 8  | 993.54042      | 497.27385       | 331.85166       | I        | 1320.65432     | 660.83080       | 440.88962       | 11 |
| 9  | 1107.58335     | 554.29531       | 369.86597       | N        | 1207.57025     | 604.28876       | 403.19493       | 10 |
| 10 | 1263.68447     | 632.34587       | 421.89967       | R        | 1093.52732     | 547.26730       | 365.18062       | 9  |
| 11 | 1378.71142     | 689.85935       | 460.24199       | D        | 937.42620      | 469.21674       | 313.14692       | 8  |
| 12 | 1525.77984     | 763.39356       | 509.26480       | F        | 822.39925      | 411.70326       | 274.80460       | 7  |
| 13 | 1640.80679     | 820.90703       | 547.60711       | D        | 675.33083      | 338.16905       | 225.78179       | 6  |
| 14 | 1754.84972     | 877.92850       | 585.62142       | N        | 560.30388      | 280.65558       | 187.43948       | 5  |
| 15 | 1869.87667     | 935.44197       | 623.96374       | D        | 446.26095      | 223.63411       | 149.42517       | 4  |
| 16 | 1940.91379     | 970.96053       | 647.64278       | A        | 331.23400      | 166.12064       | 111.08285       | 3  |
| 17 | 2053.99786     | 1027.50257      | 685.33747       | L        | 260.19688      | 130.60208       | 87.40381        | 2  |
| 18 |                |                 |                 | K        | 147.11281      | 74.06004        | 49.70912        | 1  |

Extracted from: Z:\712AB\SK17-S (Ac)\Chichi-Abaumannii-SK17-S-Acetyl\_DrWu\_20140512.raw #20560 RT: 62.38  
 ITMS, CID@35.00, z=+3, Mono m/z=734.03522 Da, MH+=2200.09110 Da, Match Tol.=0.6 Da

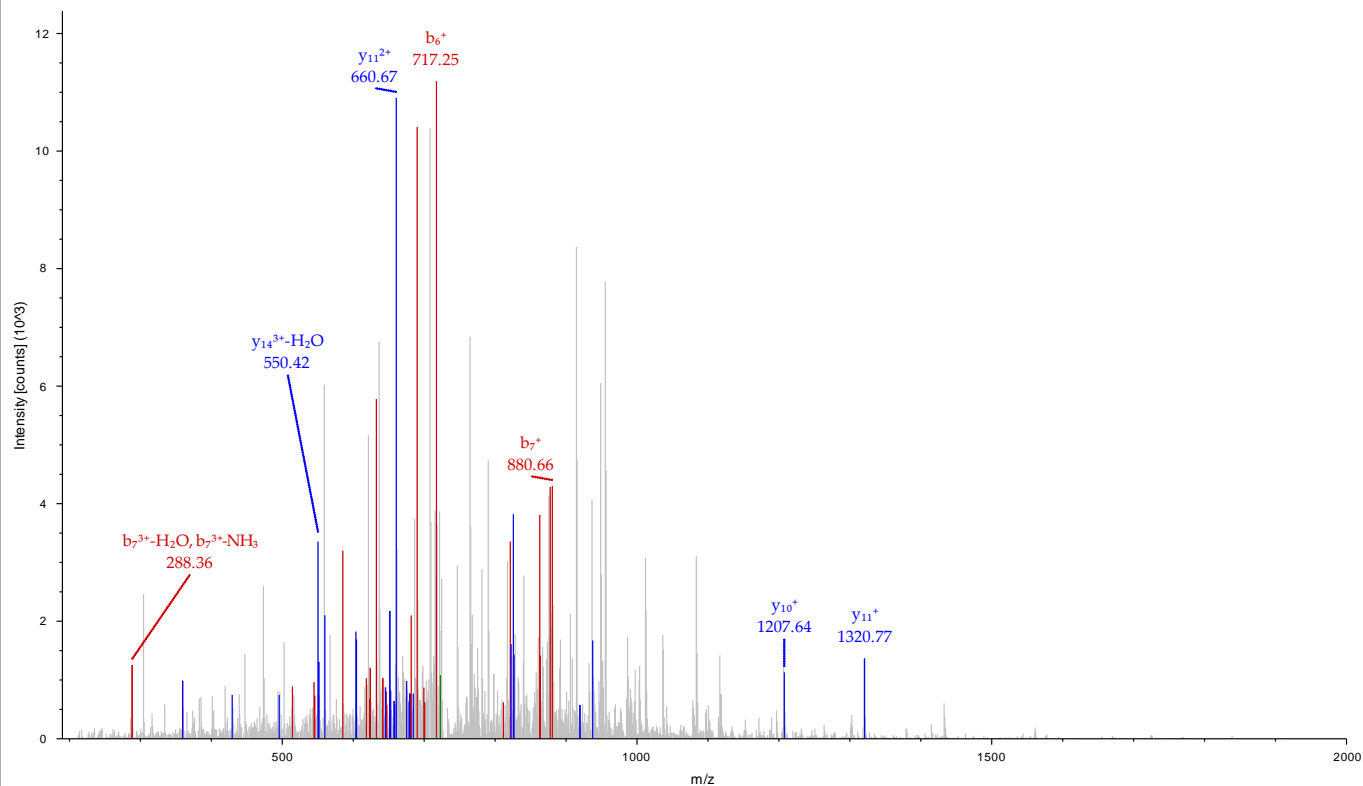

Extracted from: Z:\712AB\SK17-S (Ac)\Chichi-Abaumanni-SK17-S-Acetyl\_DrWu\_20140512.raw #25954 RT: 78.44  
 ITMS, CID@35.00, z=+3, Mono m/z=1265.30225 Da, MH+=3793.89219 Da, Match Tol.=0.6 Da

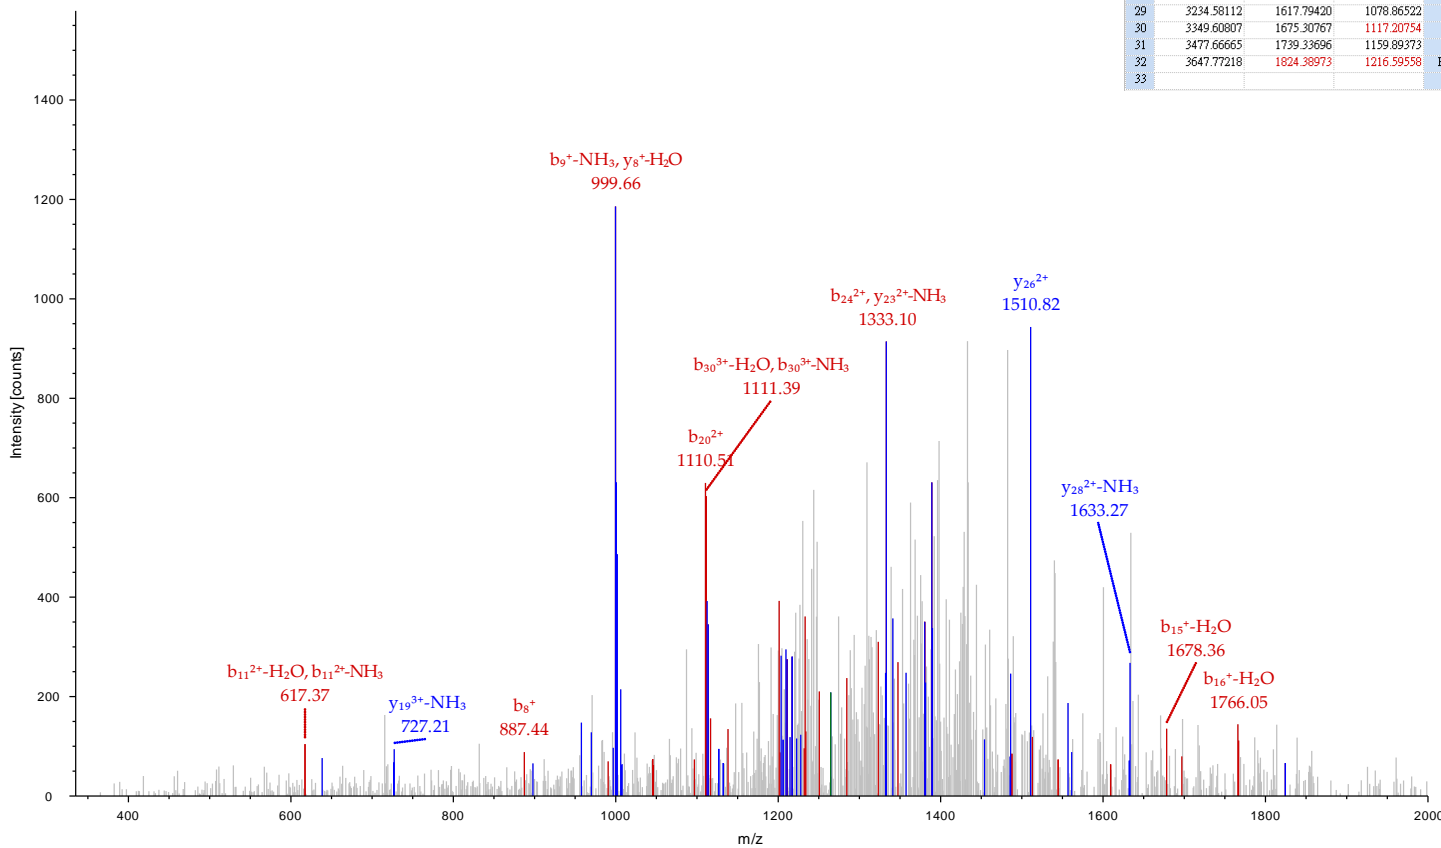

| #1 | b <sup>+</sup> | b <sup>2+</sup> | b <sup>3+</sup> | Seq.        | y <sup>+</sup> | y <sup>2+</sup> | y <sup>3+</sup> | #2 |
|----|----------------|-----------------|-----------------|-------------|----------------|-----------------|-----------------|----|
| 1  | 129.10225      | 65.05476        | 43.70560        | K           |                |                 |                 | 33 |
| 2  | 186.12372      | 93.56550        | 62.71276        | G           | 3665.78275     | 1833.39501      | 1222.59910      | 32 |
| 3  | 299.20779      | 150.10753       | 100.40745       | L           | 3608.76128     | 1804.88428      | 1203.59194      | 31 |
| 4  | 398.27621      | 199.64174       | 133.43025       | V           | 3495.67721     | 1748.34224      | 1165.89725      | 30 |
| 5  | 513.30316      | 257.15522       | 171.77257       | D           | 3396.60879     | 1698.80803      | 1132.87445      | 29 |
| 6  | 673.33381      | 337.17054       | 225.11612       | C-Carbon... | 3281.58184     | 1641.29456      | 1094.53213      | 28 |
| 7  | 774.38149      | 387.69438       | 258.79868       | T           | 3121.55118     | 1561.27923      | 1041.18858      | 27 |
| 8  | 887.46556      | 444.23642       | 296.49337       | L           | 3020.30350     | 1510.75539      | 1007.50602      | 26 |
| 9  | 1016.50816     | 508.75772       | 339.50757       | E           | 2907.41943     | 1454.21335      | 969.81133       | 25 |
| 10 | 1113.56093     | 557.28410       | 371.85849       | P           | 2778.37683     | 1389.69205      | 926.79713       | 24 |
| 11 | 1250.61984     | 625.81356       | 417.54480       | H           | 2681.32406     | 1341.16567      | 894.44620       | 23 |
| 12 | 1365.64679     | 683.32703       | 455.88711       | D           | 2544.26515     | 1272.63621      | 848.75990       | 22 |
| 13 | 1512.71521     | 756.86124       | 504.90992       | F           | 2429.23820     | 1215.12274      | 810.41758       | 21 |
| 14 | 1599.74724     | 800.37726       | 533.92060       | S           | 2282.16978     | 1141.58853      | 761.39478       | 20 |
| 15 | 1696.80001     | 848.90364       | 566.27152       | P           | 2195.13775     | 1098.07251      | 732.38410       | 19 |
| 16 | 1783.83204     | 892.41966       | 595.28220       | S           | 2098.08498     | 1049.54613      | 700.03318       | 18 |
| 17 | 1880.88481     | 940.94604       | 627.63312       | P           | 2011.05295     | 1006.03011      | 671.02250       | 17 |
| 18 | 1979.95323     | 990.48025       | 660.65593       | V           | 1914.00018     | 957.50373       | 638.67158       | 16 |
| 19 | 2108.01181     | 1054.50954      | 703.34212       | Q           | 1814.93176     | 907.96952       | 605.64877       | 15 |
| 20 | 2221.09588     | 1111.05158      | 741.03681       | L           | 1686.87318     | 843.94023       | 562.96258       | 14 |
| 21 | 2292.13300     | 1146.57014      | 764.71585       | A           | 1573.78911     | 787.39819       | 525.26789       | 13 |
| 22 | 2420.19158     | 1210.59943      | 807.40204       | Q           | 1502.75199     | 751.87963       | 501.58885       | 12 |
| 23 | 2567.22700     | 1284.11714      | 856.41385       | M-Oxidation | 1374.69341     | 687.85034       | 458.90265       | 11 |
| 24 | 2664.27977     | 1332.64352      | 888.76477       | P           | 1227.65800     | 614.33264       | 409.89005       | 10 |
| 25 | 2777.36384     | 1389.18556      | 926.45946       | L           | 1130.60523     | 565.80625       | 377.53993       | 9  |
| 26 | 2878.41152     | 1439.70940      | 960.14202       | T           | 1017.52116     | 509.26422       | 339.84524       | 8  |
| 27 | 2991.49559     | 1496.25143      | 997.83671       | L           | 916.47348      | 458.74038       | 306.16268       | 7  |
| 28 | 3105.53852     | 1553.27290      | 1035.85102      | N           | 803.38941      | 402.19834       | 268.46799       | 6  |
| 29 | 3234.58112     | 1617.79420      | 1078.86522      | E           | 689.34648      | 345.17688       | 230.45368       | 5  |
| 30 | 3349.60807     | 1675.30767      | 1117.20754      | D           | 560.30388      | 280.65558       | 187.43948       | 4  |
| 31 | 3477.66665     | 1739.33696      | 1159.89373      | Q           | 445.27693      | 223.14210       | 149.09716       | 3  |
| 32 | 3647.77218     | 1824.38973      | 1216.59558      | K-Acetyl    | 317.21835      | 159.11281       | 106.41097       | 2  |
| 33 |                |                 |                 | K           | 147.11281      | 74.06004        | 49.70912        | 1  |

| #1 | b <sup>+</sup> | b <sup>2+</sup> | Seq.     | y <sup>+</sup> | y <sup>2+</sup> | #2 |
|----|----------------|-----------------|----------|----------------|-----------------|----|
| 1  | 156.10191      | 78.55459        | L-Acetyl |                |                 | 17 |
| 2  | 227.13903      | 114.07315       | A        | 1815.98115     | 908.49421       | 16 |
| 3  | 356.18163      | 178.59445       | E        | 1744.94403     | 872.97565       | 15 |
| 4  | 512.28275      | 256.64501       | R        | 1615.90143     | 808.45435       | 14 |
| 5  | 599.31478      | 300.16103       | S        | 1459.80031     | 730.40379       | 13 |
| 6  | 670.35190      | 335.67959       | A        | 1372.76828     | 686.88778       | 12 |
| 7  | 757.38393      | 379.19560       | S        | 1301.73116     | 651.36922       | 11 |
| 8  | 828.42105      | 414.71416       | A        | 1214.69913     | 607.85320       | 10 |
| 9  | 929.46873      | 465.23800       | T        | 1143.66201     | 572.33464       | 9  |
| 10 | 1099.57427     | 550.29077       | K-Acetyl | 1042.61433     | 521.81080       | 8  |
| 11 | 1227.63285     | 614.32006       | Q        | 872.50880      | 436.75804       | 7  |
| 12 | 1340.71692     | 670.86210       | I        | 744.45022      | 372.72875       | 6  |
| 13 | 1469.75952     | 735.38340       | E        | 631.36615      | 316.18671       | 5  |
| 14 | 1570.80720     | 785.90724       | T        | 502.32355      | 251.66541       | 4  |
| 15 | 1683.89127     | 842.44927       | L        | 401.27587      | 201.14157       | 3  |
| 16 | 1782.95969     | 891.98348       | V        | 288.19180      | 144.59954       | 2  |
| 17 |                |                 | K-Acetyl | 189.12338      | 95.06533        | 1  |

Extracted from: Z:\712AB\SK17-S (Ac)\Chichi-Abaumannii-SK17-S-Acetyl\_DrWu\_20140512.raw #19590 RT: 59.68  
 ITMS, CID@35.00, z=+2, Mono m/z=986.03528 Da, MH+=1971.06328 Da, Match Tol=0.6 Da

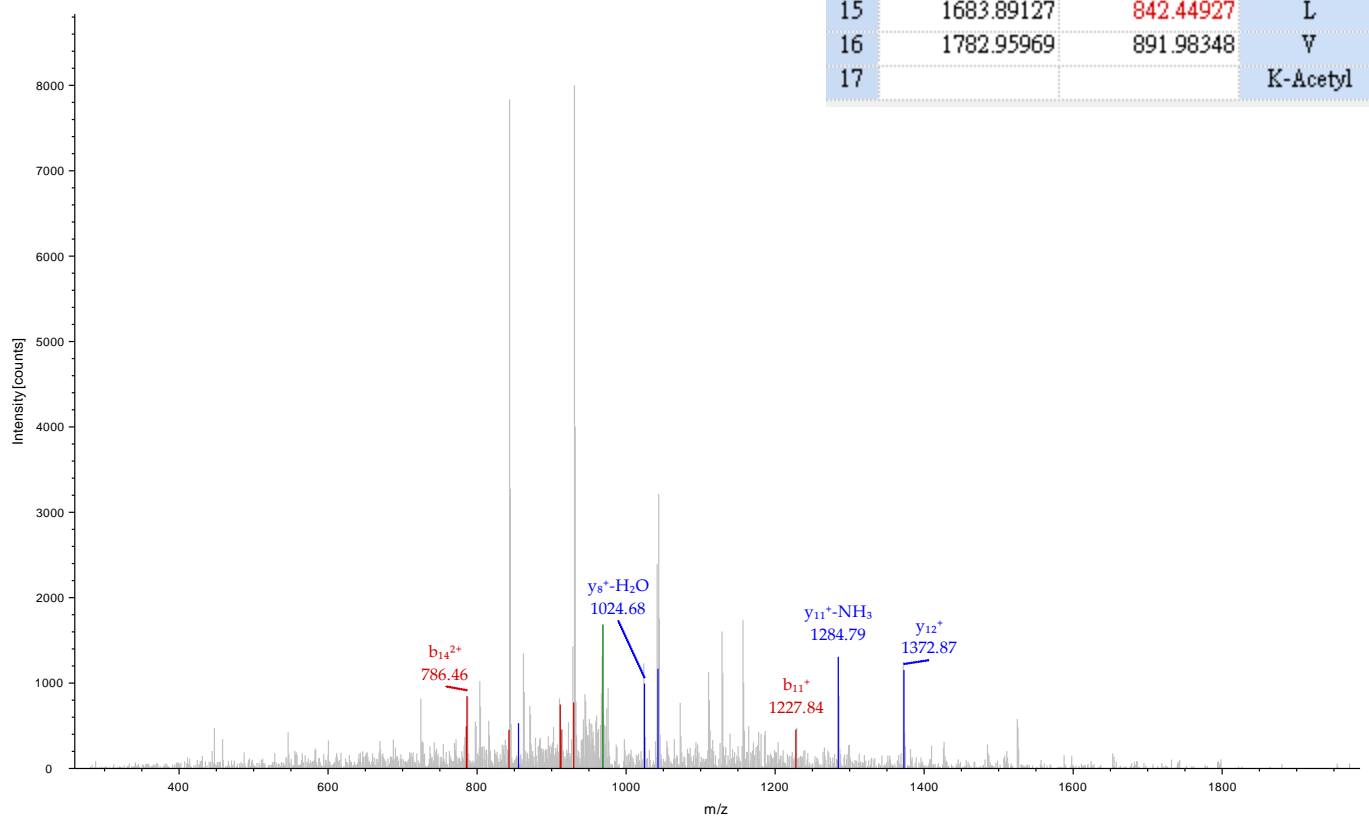

| #1 | b <sup>+</sup> | b <sup>2+</sup> | b <sup>3+</sup> | Seq.     | y <sup>+</sup> | y <sup>2+</sup> | y <sup>3+</sup> | #2 |
|----|----------------|-----------------|-----------------|----------|----------------|-----------------|-----------------|----|
| 1  | 157.06077      | 79.03402        | 53.02511        | N-Acetyl |                |                 |                 | 20 |
| 2  | 272.08772      | 136.54750       | 91.36742        | D        | 2212.12320     | 1106.56524      | 738.04592       | 19 |
| 3  | 359.11975      | 180.06351       | 120.37810       | S        | 2097.09625     | 1049.05176      | 699.70360       | 18 |
| 4  | 472.20382      | 236.60555       | 158.07279       | L        | 2010.06422     | 1005.53575      | 670.69292       | 17 |
| 5  | 601.24642      | 301.12685       | 201.08699       | E        | 1896.98015     | 948.99371       | 632.99823       | 16 |
| 6  | 730.28902      | 365.64815       | 244.10119       | E        | 1767.93755     | 884.47241       | 589.98403       | 15 |
| 7  | 817.32105      | 409.16416       | 273.11187       | S        | 1638.89495     | 819.95111       | 546.96983       | 14 |
| 8  | 914.37382      | 457.69055       | 305.46279       | P        | 1551.86292     | 776.43510       | 517.95916       | 13 |
| 9  | 1011.42659     | 506.21693       | 337.81371       | P        | 1454.81015     | 727.90871       | 485.60823       | 12 |
| 10 | 1140.46919     | 570.73823       | 380.82791       | E        | 1357.75738     | 679.38233       | 453.25731       | 11 |
| 11 | 1310.57473     | 655.79100       | 437.52976       | K-Acetyl | 1228.71478     | 614.86103       | 410.24311       | 10 |
| 12 | 1397.60676     | 699.30702       | 466.54044       | S        | 1058.60925     | 529.80826       | 353.54127       | 9  |
| 13 | 1484.63879     | 742.82303       | 495.55111       | S        | 971.57722      | 486.29225       | 324.53059       | 8  |
| 14 | 1597.72286     | 799.36507       | 533.24580       | L        | 884.54519      | 442.77623       | 295.51991       | 7  |
| 15 | 1725.78144     | 863.39436       | 575.93200       | Q        | 771.46112      | 386.23420       | 257.82522       | 6  |
| 16 | 1824.84986     | 912.92857       | 608.95480       | V        | 643.40254      | 322.20491       | 215.13903       | 5  |
| 17 | 1937.93393     | 969.47060       | 646.64949       | I        | 544.33412      | 272.67070       | 182.11622       | 4  |
| 18 | 2051.01800     | 1026.01264      | 684.34418       | I        | 431.25005      | 216.12866       | 144.42153       | 3  |
| 19 | 2180.06060     | 1090.53394      | 727.35838       | E        | 318.16598      | 159.58663       | 106.72684       | 2  |
| 20 |                |                 |                 | K-Acetyl | 189.12338      | 95.06533        | 63.71264        | 1  |

Extracted from: Z:\712AB\SK17-S (Ac)\Chichi-Abaumanni-SK17-S-Acetyl\_DrWu\_20140703.raw #13882 RT: 40.47  
 ITMS, CID@35.00, z=+3, Mono m/z=790.05933 Da, MH+=2368.16343 Da, Match Tol.=0.6 Da

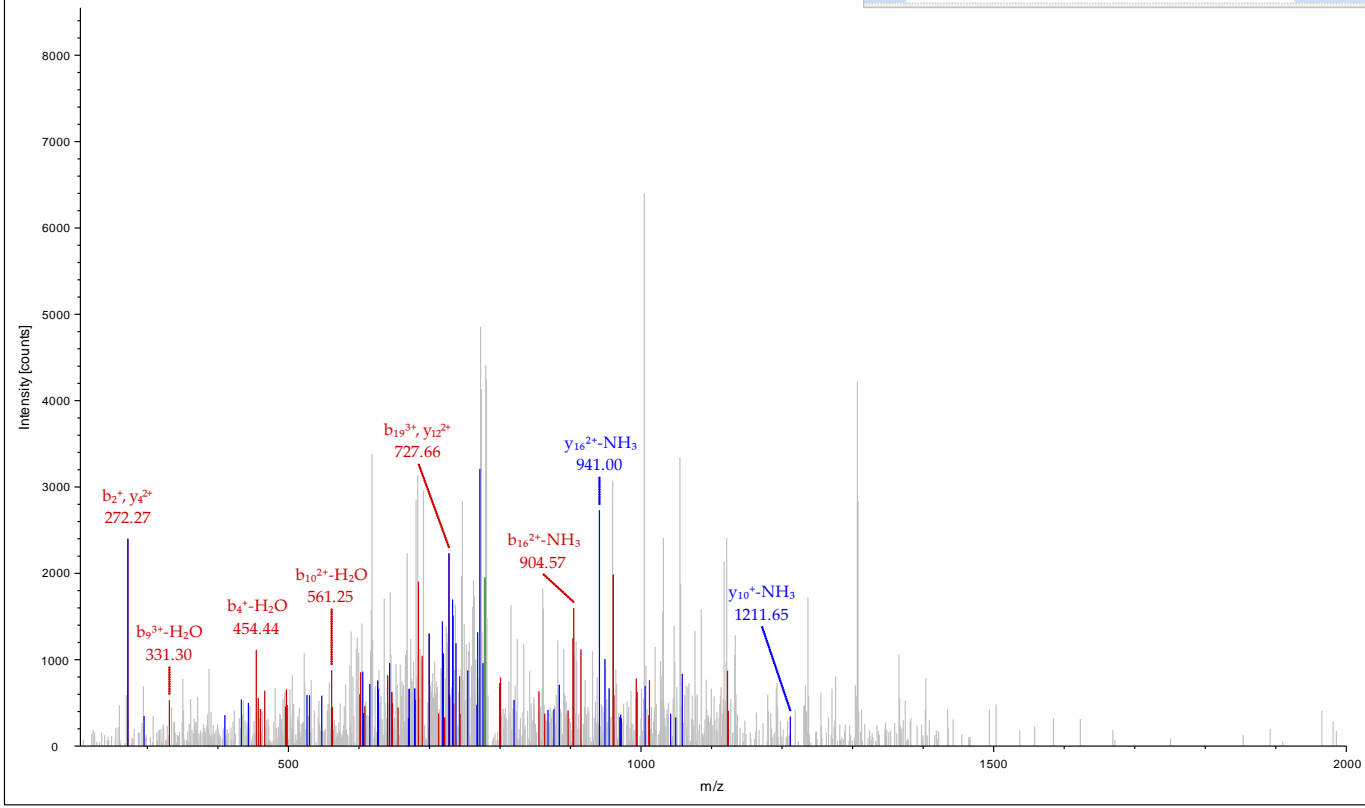

peg.657 7226

| #1 | b <sup>+</sup> | b <sup>2+</sup> | b <sup>3+</sup> | Seq.     | y <sup>+</sup> | y <sup>2+</sup> | y <sup>3+</sup> | #2 |
|----|----------------|-----------------|-----------------|----------|----------------|-----------------|-----------------|----|
| 1  | 164.07060      | 82.53894        | 55.36172        | Y        |                |                 |                 | 19 |
| 2  | 327.13392      | 164.07060       | 109.71616       | Y        | 2022.96155     | 1011.98441      | 674.99203       | 18 |
| 3  | 414.16595      | 207.58661       | 138.72683       | S        | 1859.89823     | 930.45275       | 620.63759       | 17 |
| 4  | 471.18742      | 236.09735       | 157.73399       | G        | 1772.86620     | 886.93674       | 591.62692       | 16 |
| 5  | 542.22454      | 271.61591       | 181.41303       | A        | 1715.84473     | 858.42600       | 572.61976       | 15 |
| 6  | 657.25149      | 329.12938       | 219.75535       | D        | 1644.80761     | 822.90744       | 548.94072       | 14 |
| 7  | 714.27296      | 357.64012       | 238.76250       | G        | 1529.78066     | 765.39397       | 510.59840       | 13 |
| 8  | 815.32064      | 408.16396       | 272.44506       | T        | 1472.75919     | 736.88323       | 491.59125       | 12 |
| 9  | 985.42617      | 493.21672       | 329.14691       | K-Acetyl | 1371.71151     | 686.35939       | 457.90869       | 11 |
| 10 | 1098.51024     | 549.75876       | 366.84160       | L        | 1201.60597     | 601.30662       | 401.20684       | 10 |
| 11 | 1211.59431     | 606.30079       | 404.53629       | L        | 1088.52190     | 544.76459       | 363.51215       | 9  |
| 12 | 1310.66273     | 655.83500       | 437.55909       | V        | 975.43783      | 488.22255       | 325.81746       | 8  |
| 13 | 1423.74680     | 712.37704       | 475.25378       | L        | 876.36941      | 438.68834       | 292.79465       | 7  |
| 14 | 1538.77375     | 769.89051       | 513.59610       | D        | 763.28534      | 382.14631       | 255.09996       | 6  |
| 15 | 1653.80070     | 827.40399       | 551.93842       | D        | 648.25839      | 324.63283       | 216.75765       | 5  |
| 16 | 1768.82765     | 884.91746       | 590.28073       | D        | 533.23144      | 267.11936       | 178.41533       | 4  |
| 17 | 1897.87025     | 949.43876       | 633.29493       | E        | 418.20449      | 209.60588       | 140.07301       | 3  |
| 18 | 2011.91318     | 1006.46023      | 671.30924       | N        | 289.16189      | 145.08458       | 97.05881        | 2  |
| 19 |                |                 |                 | R        | 175.11896      | 88.06312        | 59.04450        | 1  |

Extracted from: Z:712ABS17-S (Ac)Chichi-Abaumannii-SK17-R-Acetyl\_DrWu\_20140703.raw #20925 RT: 58.30  
 ITMS, CID@35.00, z=+3, Mono m/z=729.35181 Da, MH+=2186.04087 Da, Match Tol.=0.6 Da

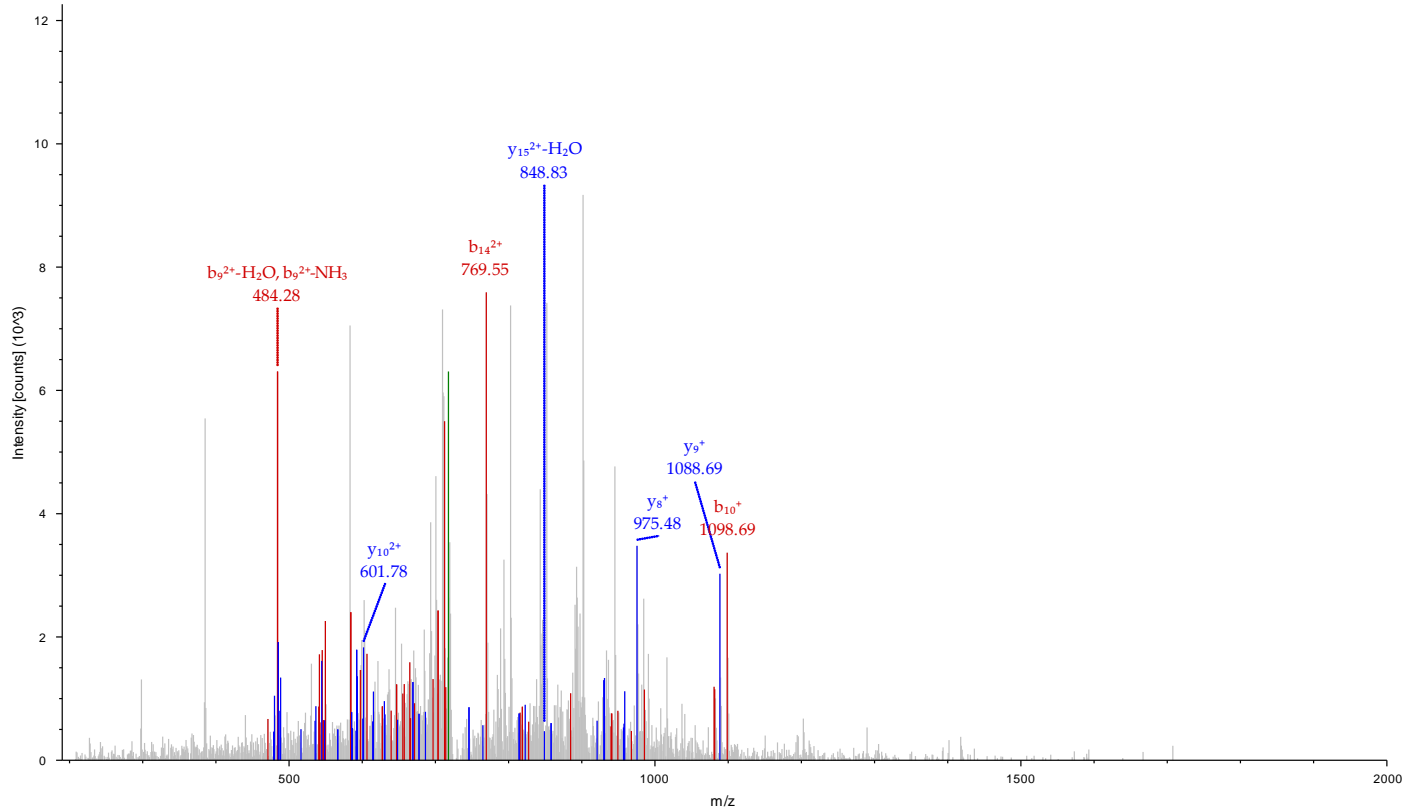

peg.711 3928

| #1 | b <sup>+</sup> | b <sup>2+</sup> | Seq.     | y <sup>+</sup> | y <sup>2+</sup> | #2 |
|----|----------------|-----------------|----------|----------------|-----------------|----|
| 1  | 102.05496      | 51.53112        | T        |                |                 | 14 |
| 2  | 215.13903      | 108.07315       | L        | 1337.75366     | 669.38047       | 13 |
| 3  | 312.19180      | 156.59954       | P        | 1224.66959     | 612.83843       | 12 |
| 4  | 441.23440      | 221.12084       | E        | 1127.61682     | 564.31205       | 11 |
| 5  | 512.27152      | 256.63940       | A        | 998.57422      | 499.79075       | 10 |
| 6  | 583.30864      | 292.15796       | A        | 927.53710      | 464.27219       | 9  |
| 7  | 654.34576      | 327.67652       | A        | 856.49998      | 428.75363       | 8  |
| 8  | 767.42983      | 384.21855       | L        | 785.46286      | 393.23507       | 7  |
| 9  | 838.46695      | 419.73711       | A        | 672.37879      | 336.69303       | 6  |
| 10 | 909.50407      | 455.25567       | A        | 601.34167      | 301.17447       | 5  |
| 11 | 980.54119      | 490.77423       | A        | 530.30455      | 265.65591       | 4  |
| 12 | 1094.58412     | 547.79570       | N        | 459.26743      | 230.13735       | 3  |
| 13 | 1264.68965     | 632.84846       | K-Acetyl | 345.22450      | 173.11589       | 2  |
| 14 |                |                 | R        | 175.11896      | 88.06312        | 1  |

Extracted from: Z:\712AB\SK17-S (Ac)\Chichi-Abaumannii-SK17-S-Acetyl\_DrWu\_20140512.raw #3928 RT:20.07  
 ITMS, CID@35.00, z=+2, Mono m/z=719.90942 Da, MH+=1438.81157 Da, Match Tol.=0.6 Da

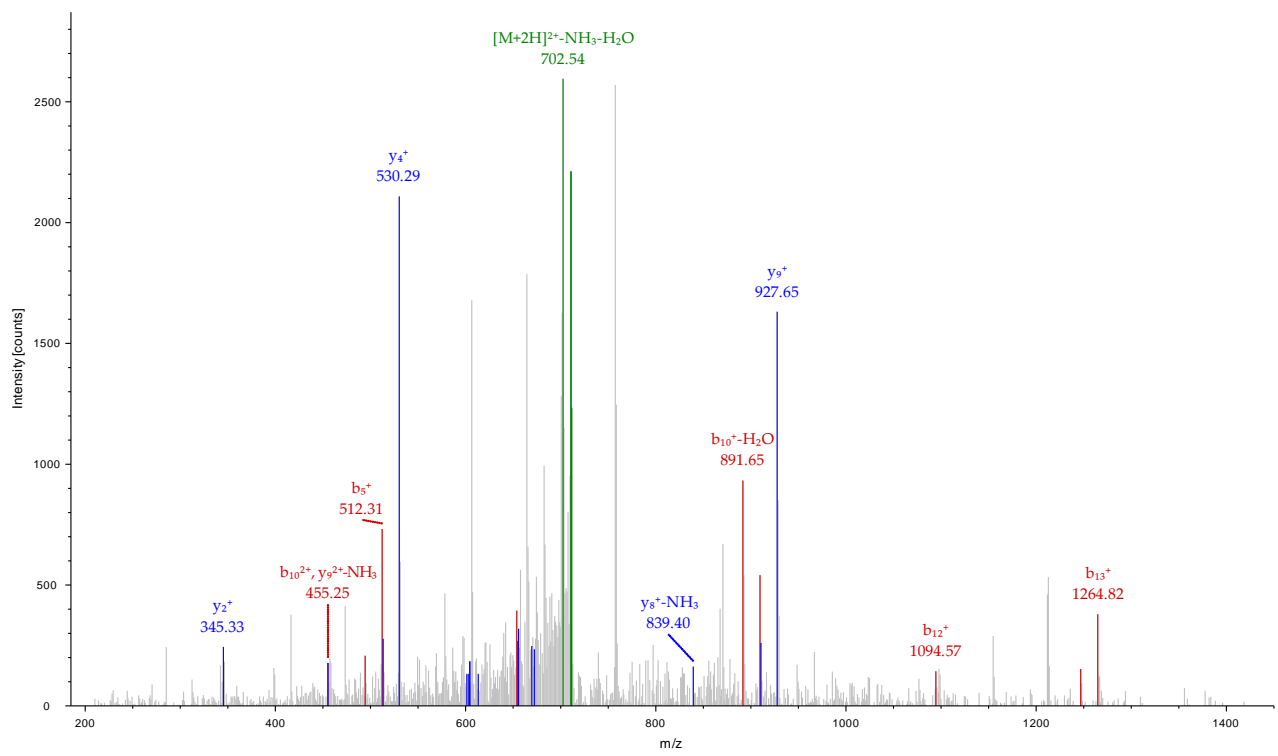

peg.723 21672

| #1 | b <sup>+</sup> | b <sup>2+</sup> | Seq.     | y <sup>+</sup> | y <sup>2+</sup> | #2 |
|----|----------------|-----------------|----------|----------------|-----------------|----|
| 1  | 199.11896      | 100.06312       | R-Acetyl |                |                 | 11 |
| 2  | 328.16156      | 164.58442       | E        | 1206.61138     | 603.80933       | 10 |
| 3  | 442.20449      | 221.60588       | N        | 1077.56878     | 539.28803       | 9  |
| 4  | 570.26307      | 285.63517       | Q        | 963.52585      | 482.26656       | 8  |
| 5  | 684.30600      | 342.65664       | N        | 835.46727      | 418.23727       | 7  |
| 6  | 741.32747      | 371.16737       | G        | 721.42434      | 361.21581       | 6  |
| 7  | 911.43301      | 456.22014       | K-Acetyl | 664.40287      | 332.70507       | 5  |
| 8  | 1058.50143     | 529.75435       | F        | 494.29733      | 247.65230       | 4  |
| 9  | 1171.58550     | 586.29639       | L        | 347.22891      | 174.11809       | 3  |
| 10 | 1258.61753     | 629.81240       | S        | 234.14484      | 117.57606       | 2  |
| 11 |                |                 | K        | 147.11281      | 74.06004        | 1  |

Extracted from: Z:\712AB\SK17-S (Ac)\Chichi-Abaumannii-SK17-R-Acetyl\_DrWu\_20140512.raw #21672 RT: 61.44  
 ITMS, CID@35.00, z=+2, Mono m/z=702.87122 Da, MH+=1404.73516 Da, Match Tol.=0.6 Da

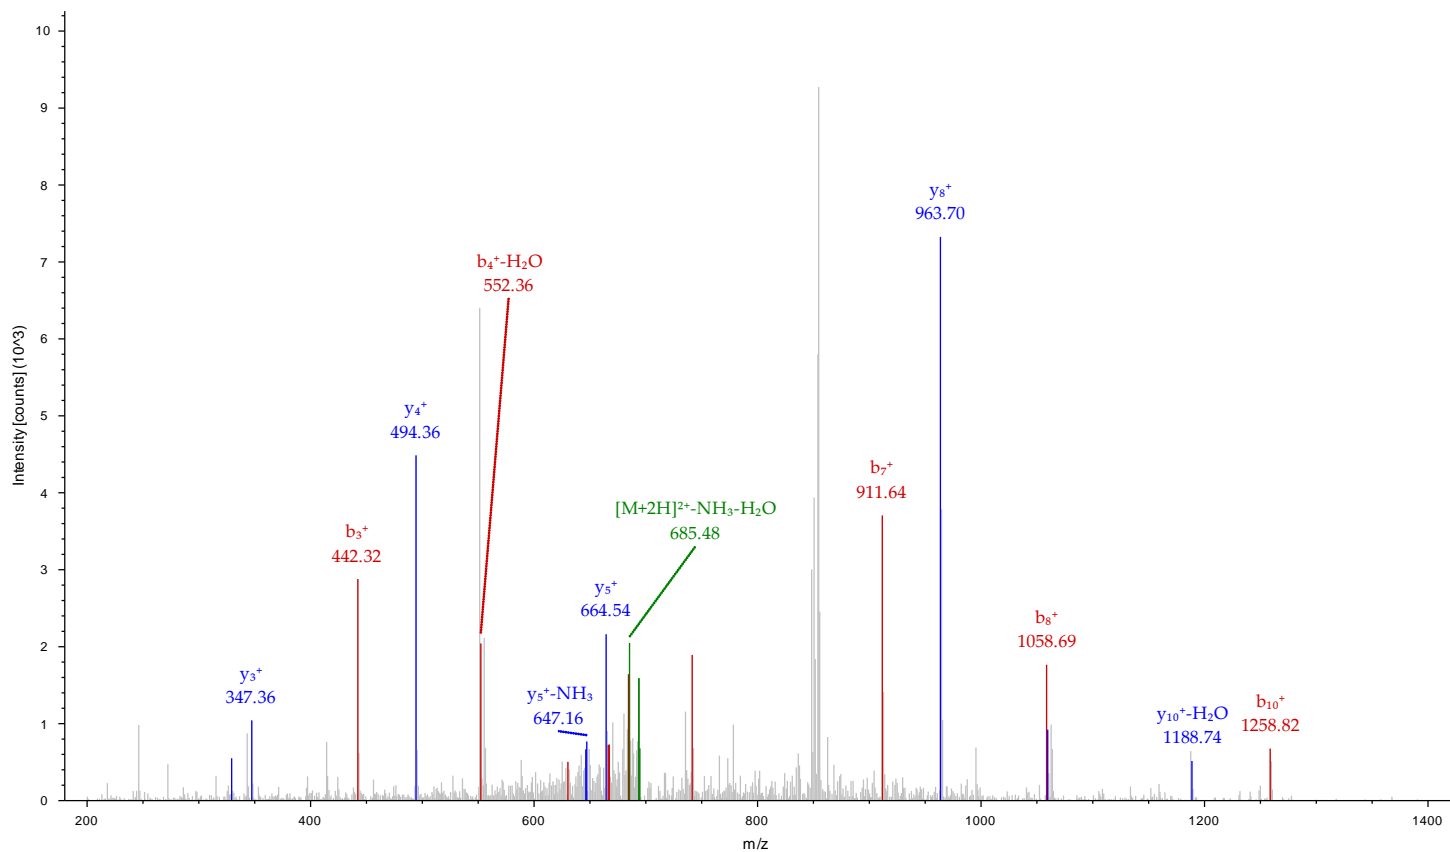

peg.723 19925

| #1 | b <sup>+</sup> | b <sup>2+</sup> | Seq.     | y <sup>+</sup> | y <sup>2+</sup> | #2 |
|----|----------------|-----------------|----------|----------------|-----------------|----|
| 1  | 199.11896      | 100.06312       | R-Acetyl |                |                 | 11 |
| 2  | 328.16156      | 164.58442       | E        | 1206.61138     | 603.80933       | 10 |
| 3  | 442.20449      | 221.60588       | N        | 1077.56878     | 539.28803       | 9  |
| 4  | 570.26307      | 285.63517       | Q        | 963.52585      | 482.26656       | 8  |
| 5  | 684.30600      | 342.65664       | N        | 835.46727      | 418.23727       | 7  |
| 6  | 741.32747      | 371.16737       | G        | 721.42434      | 361.21581       | 6  |
| 7  | 911.43301      | 456.22014       | K-Acetyl | 664.40287      | 332.70507       | 5  |
| 8  | 1058.50143     | 529.75435       | F        | 494.29733      | 247.65230       | 4  |
| 9  | 1171.58550     | 586.29639       | L        | 347.22891      | 174.11809       | 3  |
| 10 | 1258.61753     | 629.81240       | S        | 234.14484      | 117.57606       | 2  |
| 11 |                |                 | K        | 147.11281      | 74.06004        | 1  |

Extracted from: Z:\712AB\SK17-S (Ac)\Chichi-Abaumannii-SK17-S-Acetyl\_DrWu\_20140512.raw #19925 RT: 60.61  
ITMS, CID@35.00, z=+2, Mono m/z=702.87134 Da, MH+=1404.73540 Da, Match Tol.=0.6 Da

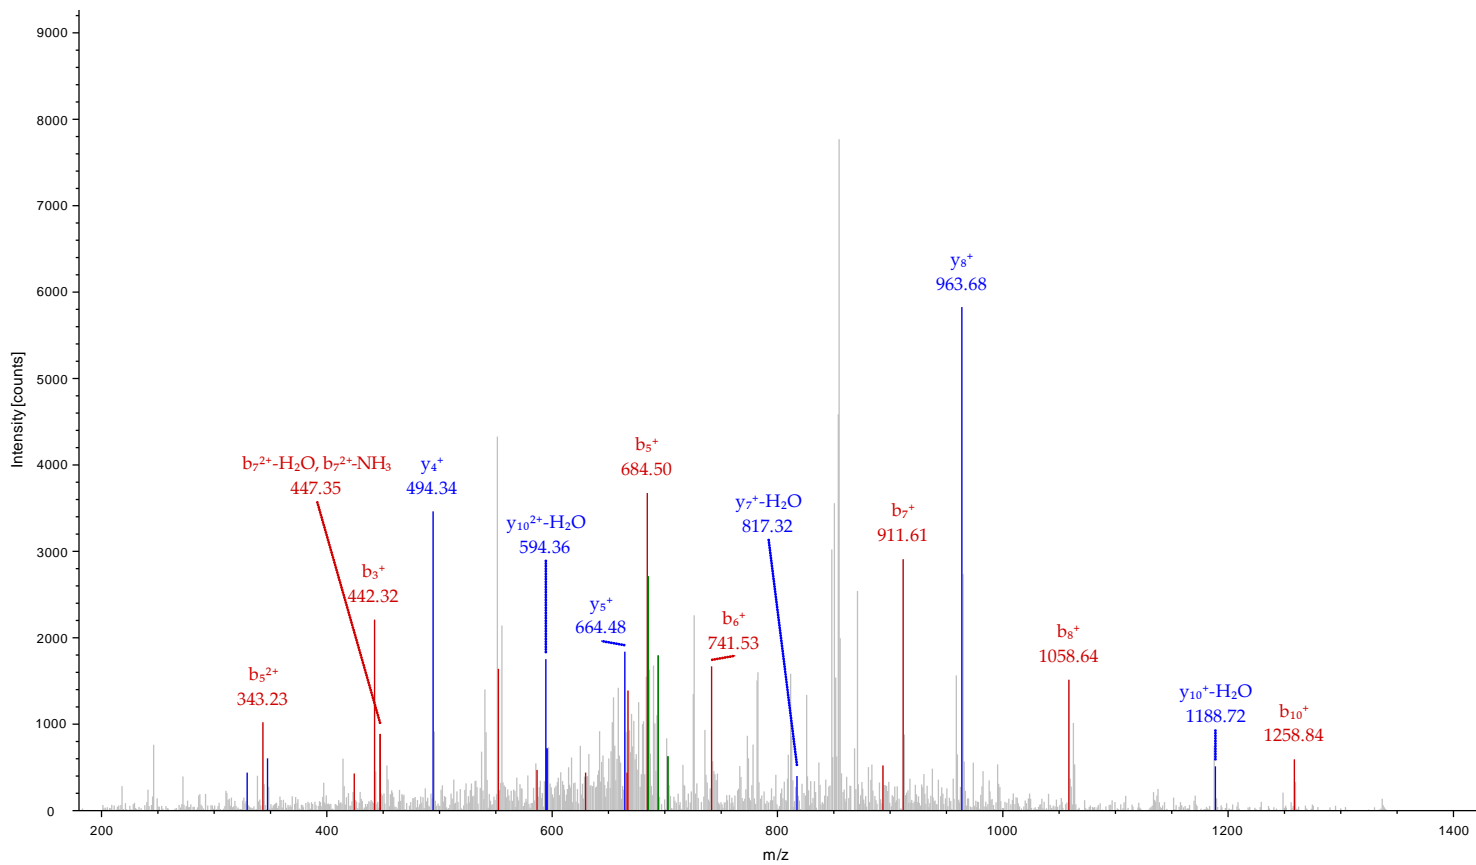



peg.764 6578

| #1 | b <sup>+</sup> | b <sup>2+</sup> | Seq.     | y <sup>+</sup> | y <sup>2+</sup> | #2 |
|----|----------------|-----------------|----------|----------------|-----------------|----|
| 1  | 72.04440       | 36.52584        | A        |                |                 | 8  |
| 2  | 186.08733      | 93.54730        | N        | 914.49421      | 457.75074       | 7  |
| 3  | 299.17140      | 150.08934       | I        | 800.45128      | 400.72928       | 6  |
| 4  | 428.21400      | 214.61064       | E        | 687.36721      | 344.18724       | 5  |
| 5  | 598.31953      | 299.66340       | K-Acetyl | 558.32461      | 279.66594       | 4  |
| 6  | 669.35665      | 335.18196       | A        | 388.21908      | 194.61318       | 3  |
| 7  | 797.41523      | 399.21125       | Q        | 317.18196      | 159.09462       | 2  |
| 8  |                |                 | K-Acetyl | 189.12338      | 95.06533        | 1  |

Extracted from: Z:\712AB\SK17-S (Ac)\Chichi-Abaumannii-SK17-R-Acetyl\_DrWu\_20140512.raw #6578 RT: 23.25  
 ITMS, CID@35.00, z=+2, Mono m/z=493.27417 Da, MH+=985.54106 Da, Match Tol.=0.6 Da

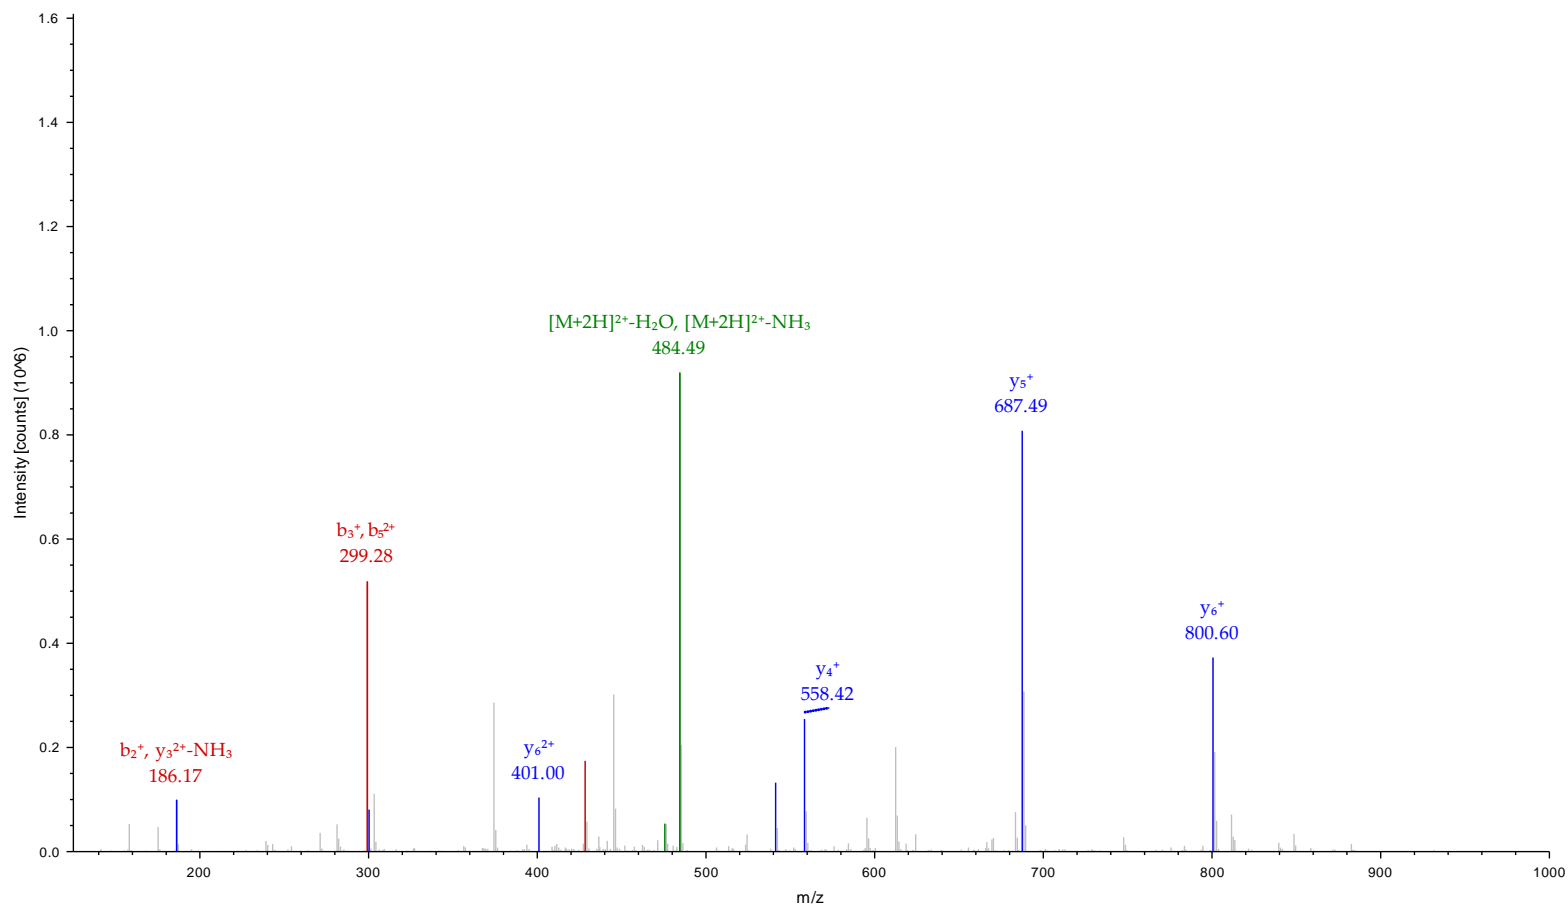

# peg.843 8167

| #1 | b <sup>+</sup> | b <sup>2+</sup> | Seq.        | y <sup>+</sup> | y <sup>2+</sup> | #2 |
|----|----------------|-----------------|-------------|----------------|-----------------|----|
| 1  | 171.11281      | 86.06004        | K-Acetyl    |                |                 | 14 |
| 2  | 357.19213      | 179.09970       | W           | 1514.77849     | 757.89288       | 13 |
| 3  | 504.22755      | 252.61741       | M-Oxidation | 1328.69917     | 664.85322       | 12 |
| 4  | 603.29597      | 302.15162       | V           | 1181.66375     | 591.33551       | 11 |
| 5  | 731.35455      | 366.18091       | Q           | 1082.59533     | 541.80130       | 10 |
| 6  | 830.42297      | 415.71512       | V           | 954.53675      | 477.77201       | 9  |
| 7  | 901.46009      | 451.23368       | A           | 855.46833      | 428.23780       | 8  |
| 8  | 1014.54416     | 507.77572       | L           | 784.43121      | 392.71924       | 7  |
| 9  | 1085.58128     | 543.29428       | A           | 671.34714      | 336.17721       | 6  |
| 10 | 1182.63405     | 591.82066       | P           | 600.31002      | 300.65865       | 5  |
| 11 | 1296.67698     | 648.84213       | N           | 503.25725      | 252.13226       | 4  |
| 12 | 1424.73556     | 712.87142       | Q           | 389.21432      | 195.11080       | 3  |
| 13 | 1538.77849     | 769.89288       | N           | 261.15574      | 131.08151       | 2  |
| 14 |                |                 | K           | 147.11281      | 74.06004        | 1  |

Extracted from: Z:\712AB\SK17-S (Ac)\Chichi-Abaumannii-SK17-S-Acetyl\_DrWu\_20140703.raw #8167 RT: 27.03  
 ITMS, CID@35.00, z=+2, Mono m/z=842.94098 Da, MH+=1684.87468 Da, Match Tol.=0.6 Da

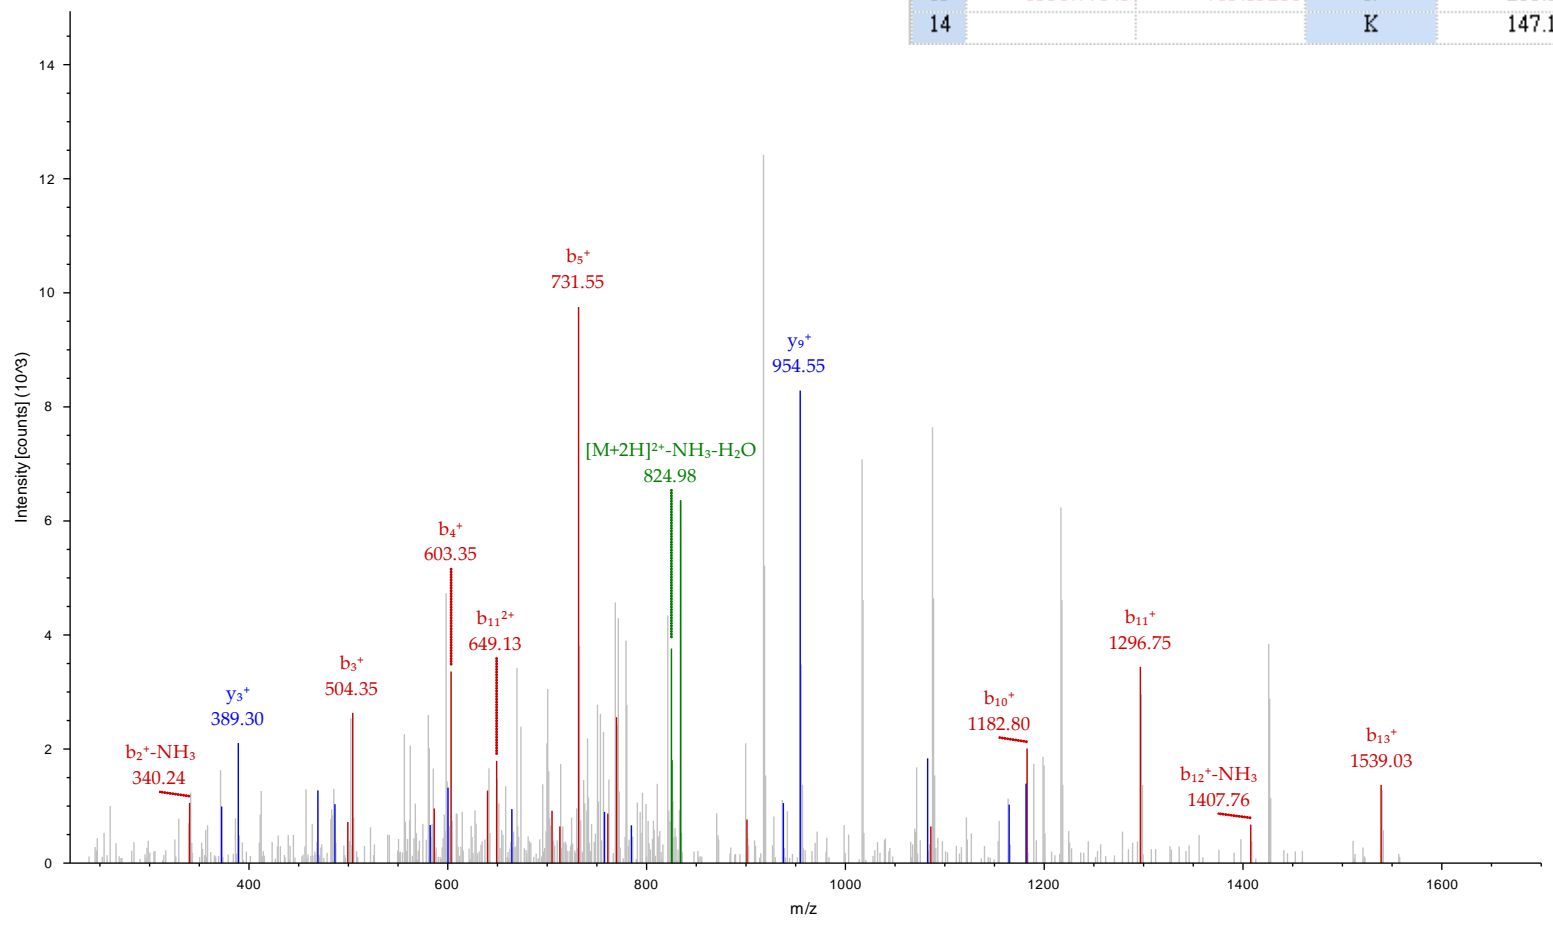

peg.852 17246

| #1 | b <sup>+</sup> | b <sup>2+</sup> | Seq.        | y <sup>+</sup> | y <sup>2+</sup> | #2 |
|----|----------------|-----------------|-------------|----------------|-----------------|----|
| 1  | 156.10191      | 78.55459        | L-Acetyl    |                |                 | 12 |
| 2  | 271.12886      | 136.06807       | D           | 1428.68622     | 714.84675       | 11 |
| 3  | 418.16428      | 209.58578       | M-Oxidation | 1313.65927     | 657.33327       | 10 |
| 4  | 505.19631      | 253.10179       | S           | 1166.62385     | 583.81556       | 9  |
| 5  | 618.28038      | 309.64383       | L           | 1079.59182     | 540.29955       | 8  |
| 6  | 765.31579      | 383.16153       | M-Oxidation | 966.50775      | 483.75751       | 7  |
| 7  | 862.36856      | 431.68792       | P           | 819.47234      | 410.23981       | 6  |
| 8  | 1032.47410     | 516.74069       | K-Acetyl    | 722.41957      | 361.71342       | 5  |
| 9  | 1195.53742     | 598.27235       | Y           | 552.31403      | 276.66065       | 4  |
| 10 | 1323.63239     | 662.31983       | K           | 389.25071      | 195.12899       | 3  |
| 11 | 1437.67532     | 719.34130       | N           | 261.15574      | 131.08151       | 2  |
| 12 |                |                 | K           | 147.11281      | 74.06004        | 1  |

Extracted from: Z:\712AB\SK17-S (Ac)\Chichi-Abaumannii-SK17-R-Acetyl\_DrWu\_20140512.raw #17246 RT: 48.80  
 ITMS, CID@35.00, z=+2, Mono m/z=792.40045 Da, MH+=1583.79363 Da, Match Tol.=0.6 Da

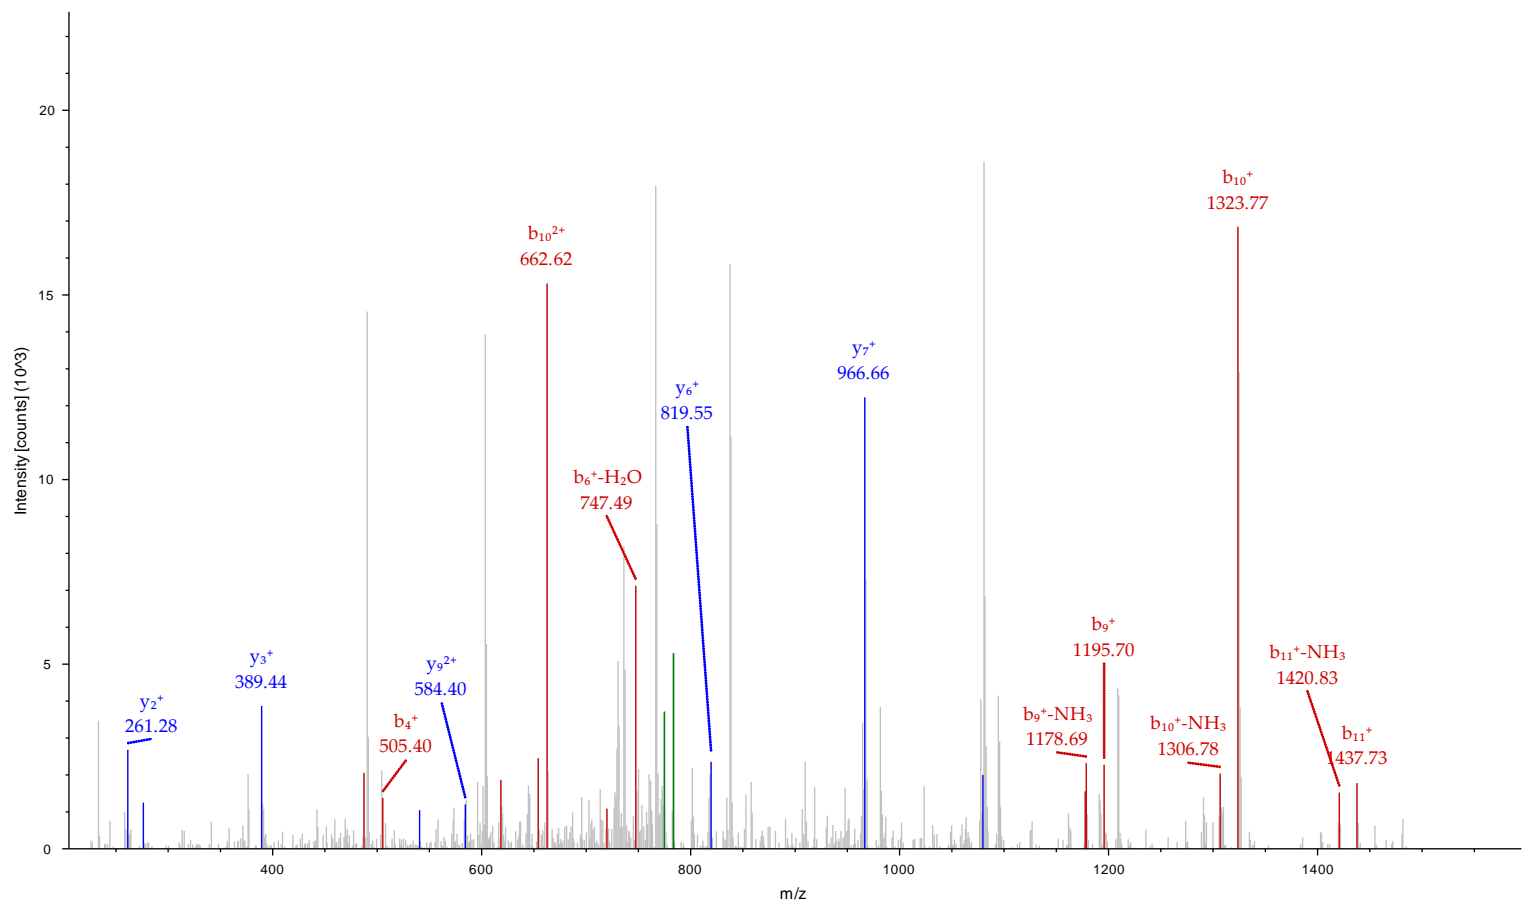

peg.852 17304

| #1 | b <sup>+</sup> | b <sup>2+</sup> | Seq.        | y <sup>+</sup> | y <sup>2+</sup> | #2 |
|----|----------------|-----------------|-------------|----------------|-----------------|----|
| 1  | 156.10191      | 78.55459        | L-Acetyl    |                |                 | 12 |
| 2  | 271.12886      | 136.06807       | D           | 1428.68622     | 714.84675       | 11 |
| 3  | 418.16428      | 209.58578       | M-Oxidation | 1313.65927     | 657.33327       | 10 |
| 4  | 505.19631      | 253.10179       | S           | 1166.62385     | 583.81556       | 9  |
| 5  | 618.28038      | 309.64383       | L           | 1079.59182     | 540.29955       | 8  |
| 6  | 765.31579      | 383.16153       | M-Oxidation | 966.50775      | 483.75751       | 7  |
| 7  | 862.36856      | 431.68792       | P           | 819.47234      | 410.23981       | 6  |
| 8  | 1032.47410     | 516.74069       | K-Acetyl    | 722.41957      | 361.71342       | 5  |
| 9  | 1195.53742     | 598.27235       | Y           | 552.31403      | 276.66065       | 4  |
| 10 | 1323.63239     | 662.31983       | K           | 389.25071      | 195.12899       | 3  |
| 11 | 1437.67532     | 719.34130       | N           | 261.15574      | 131.08151       | 2  |
| 12 |                |                 | K           | 147.11281      | 74.06004        | 1  |

Extracted from: Z:\V12AB\SK17-S (Ac)Chichi-Abaumannii-SK17-S-Acetyl\_DrWu\_20140703.raw #17304 RT: 48.69  
 ITMS, CID@35.00, z=+2, Mono m/z=792.40063 Da, MH+=1583.79399 Da, Match Tol.=0.6 Da

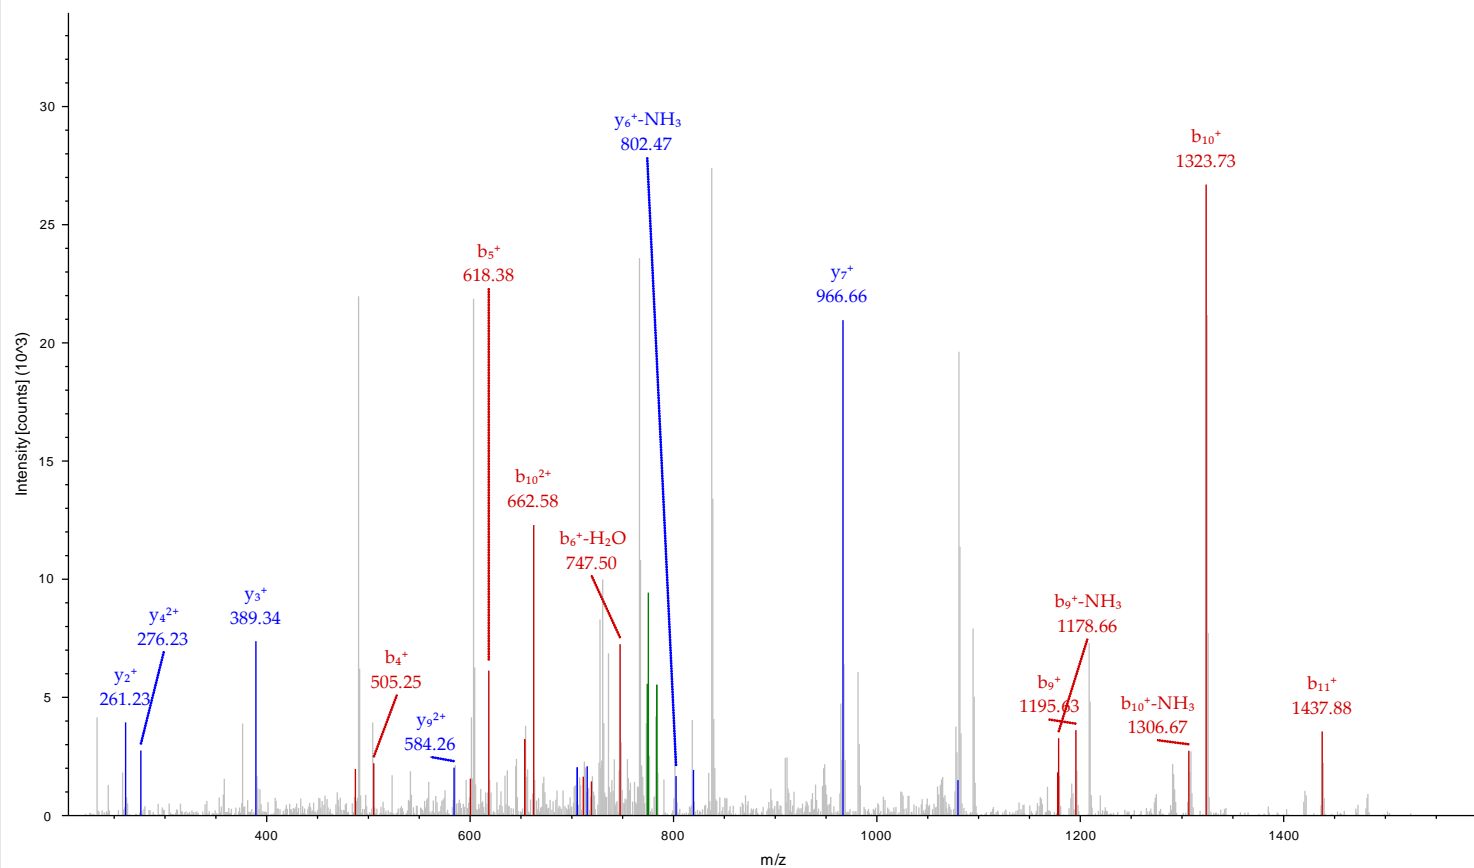

# peg.884 26307

Extracted from: Z:\712AB\SK17-S (Ac)\Chichi-Abaumannii-SK17-R-Acetyl\_DrWu\_20140703.raw #26307 RT: 72.04  
 ITMS, CID@35.00, z=+3, Mono m/z=1180.27026 Da, MH+=3538.79624 Da, Match Tol.=0.6 Da

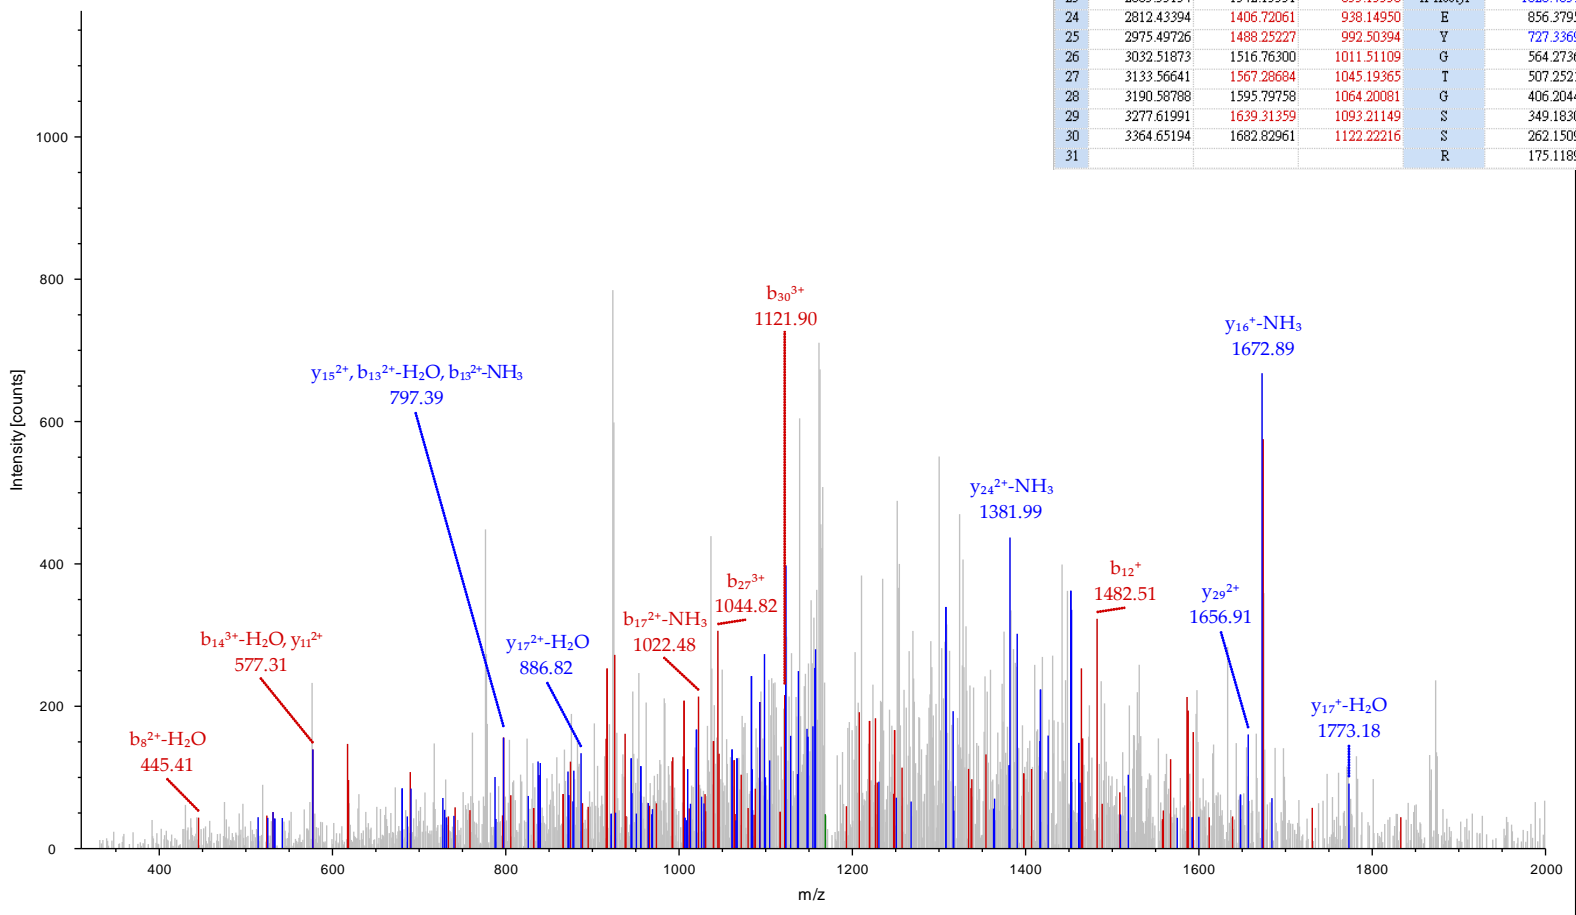

| #1 | b <sup>+</sup> | b <sup>2+</sup> | b <sup>3+</sup> | Seq.        | y <sup>+</sup> | y <sup>2+</sup> | y <sup>3+</sup> | #2 |
|----|----------------|-----------------|-----------------|-------------|----------------|-----------------|-----------------|----|
| 1  | 156.10191      | 78.55459        | 52.70549        | L-Acetyl    |                |                 |                 | 31 |
| 2  | 227.13903      | 114.07315       | 76.38453        | A           | 3383.66899     | 1692.33813      | 1128.56118      | 30 |
| 3  | 340.22310      | 170.61519       | 114.07922       | I           | 3312.63187     | 1656.81957      | 1104.88214      | 29 |
| 4  | 503.28642      | 252.14685       | 168.43366       | Y           | 3199.54780     | 1600.27754      | 1067.18745      | 28 |
| 5  | 618.31337      | 309.66032       | 206.77597       | D           | 3036.48448     | 1518.74588      | 1012.83301      | 27 |
| 6  | 689.35049      | 345.17888       | 230.45501       | A           | 2921.45753     | 1461.23240      | 974.49069       | 26 |
| 7  | 760.38761      | 380.69744       | 254.13405       | A           | 2850.42041     | 1425.71384      | 950.81165       | 25 |
| 8  | 907.42303      | 454.21515       | 303.14586       | M-Oxidation | 2779.38329     | 1390.19528      | 927.13261       | 24 |
| 9  | 1063.52415     | 532.26571       | 355.17957       | R           | 2632.34788     | 1316.67758      | 878.12081       | 23 |
| 10 | 1226.58747     | 613.79737       | 409.53401       | Y           | 2476.24676     | 1238.62702      | 826.08710       | 22 |
| 11 | 1354.64605     | 677.82666       | 452.22020       | Q           | 2313.18344     | 1157.09536      | 771.73266       | 21 |
| 12 | 1482.70463     | 741.85595       | 494.90639       | Q           | 2185.12486     | 1093.06607      | 729.04647       | 20 |
| 13 | 1611.74723     | 806.37725       | 537.92059       | E           | 2057.06628     | 1029.03678      | 686.36028       | 19 |
| 14 | 1748.80614     | 874.90671       | 583.60690       | H           | 1928.02368     | 964.51548       | 643.34608       | 18 |
| 15 | 1849.85382     | 925.43055       | 617.28946       | T           | 1790.96477     | 895.98602       | 597.65977       | 17 |
| 16 | 1946.90659     | 973.95693       | 649.64038       | P           | 1689.91709     | 845.46218       | 563.97721       | 16 |
| 17 | 2059.99066     | 1030.49897      | 687.33507       | L           | 1592.86432     | 796.93580       | 531.62629       | 15 |
| 18 | 2159.05908     | 1080.03318      | 720.35788       | V           | 1479.78025     | 740.39376       | 493.93160       | 14 |
| 19 | 2272.14315     | 1136.57521      | 758.05257       | I           | 1380.71183     | 690.89555       | 460.90879       | 13 |
| 20 | 2385.22722     | 1193.11725      | 795.74726       | I           | 1267.62776     | 634.31752       | 423.21410       | 12 |
| 21 | 2456.26434     | 1228.63581      | 819.42630       | A           | 1154.54369     | 577.77548       | 385.51941       | 11 |
| 22 | 2513.28581     | 1257.14654      | 838.43345       | G           | 1083.50657     | 542.25692       | 361.84037       | 10 |
| 23 | 2683.39134     | 1342.19931      | 895.13530       | K-Acetyl    | 1026.48510     | 513.74619       | 342.83322       | 9  |
| 24 | 2812.43394     | 1406.72061      | 938.14950       | E           | 856.37956      | 428.69342       | 286.13137       | 8  |
| 25 | 2975.49726     | 1488.25227      | 992.50394       | Y           | 727.33696      | 364.17212       | 243.11717       | 7  |
| 26 | 3032.51873     | 1516.76300      | 1011.51109      | G           | 564.27364      | 282.64046       | 188.76273       | 6  |
| 27 | 3133.56641     | 1567.28684      | 1045.19365      | T           | 507.25217      | 254.12972       | 169.75557       | 5  |
| 28 | 3190.58788     | 1595.79758      | 1064.20081      | G           | 406.20449      | 203.60588       | 136.07301       | 4  |
| 29 | 3277.61991     | 1639.31359      | 1093.21149      | S           | 349.18302      | 175.09515       | 117.06586       | 3  |
| 30 | 3364.65194     | 1682.82961      | 1122.22216      | S           | 262.15099      | 131.57913       | 88.05518        | 2  |
| 31 |                |                 |                 | R           | 175.11896      | 88.06312        | 59.04450        | 1  |

# peg.893 29988

| #1 | b <sup>+</sup> | b <sup>2+</sup> | b <sup>3+</sup> | Seq.     | y <sup>-</sup> | y <sup>2+</sup> | y <sup>3+</sup> | #2 |
|----|----------------|-----------------|-----------------|----------|----------------|-----------------|-----------------|----|
| 1  | 190.08626      | 95.54677        | 64.03360        | F-Acetyl |                |                 |                 | 36 |
| 2  | 305.11321      | 153.06024       | 102.37592       | D        | 3971.96629     | 1986.48678      | 1324.66028      | 35 |
| 3  | 433.17179      | 217.08953       | 145.06211       | Q        | 3856.93934     | 1928.97331      | 1286.31796      | 34 |
| 4  | 490.19326      | 245.60027       | 164.06927       | G        | 3728.88076     | 1864.94402      | 1243.63177      | 33 |
| 5  | 591.24094      | 296.12411       | 197.75183       | T        | 3671.85929     | 1836.43328      | 1224.62461      | 32 |
| 6  | 738.30936      | 369.65832       | 246.77464       | F        | 3570.81161     | 1785.90944      | 1190.94205      | 31 |
| 7  | 809.34648      | 405.17688       | 270.45368       | A        | 3423.74319     | 1712.37523      | 1141.91925      | 30 |
| 8  | 946.40539      | 473.70633       | 316.13998       | H        | 3352.70607     | 1676.85667      | 1118.24021      | 29 |
| 9  | 1047.45307     | 524.23017       | 349.82254       | T        | 3215.64716     | 1608.32722      | 1072.55390      | 28 |
| 10 | 1160.53714     | 580.77221       | 387.51723       | L        | 3114.59948     | 1557.80338      | 1038.87134      | 27 |
| 11 | 1247.56917     | 624.28822       | 416.52791       | S        | 3001.51541     | 1501.26134      | 1001.17665      | 26 |
| 12 | 1360.65324     | 680.83026       | 454.22260       | L        | 2914.48338     | 1457.74533      | 972.16598       | 25 |
| 13 | 1507.72166     | 754.36447       | 503.24540       | F        | 2801.39931     | 1401.20329      | 934.47129       | 24 |
| 14 | 1636.76426     | 818.88577       | 546.25960       | E        | 2654.33089     | 1327.66908      | 885.44848       | 23 |
| 15 | 1749.84833     | 875.42780       | 583.95429       | I        | 2525.28829     | 1263.14778      | 842.43428       | 22 |
| 16 | 1919.95387     | 960.48057       | 640.65614       | K-Acetyl | 2412.20422     | 1206.60575      | 804.73959       | 21 |
| 17 | 2090.05940     | 1045.53334      | 697.35798       | K-Acetyl | 2242.09869     | 1121.55298      | 748.03775       | 20 |
| 18 | 2187.11217     | 1094.05972      | 729.70891       | P        | 2071.99315     | 1036.50021      | 691.33590       | 19 |
| 19 | 2274.14420     | 1137.57574      | 758.71958       | S        | 1974.94038     | 987.97383       | 658.98498       | 18 |
| 20 | 2345.18132     | 1173.09430      | 782.39862       | A        | 1887.90835     | 944.45781       | 629.97430       | 17 |
| 21 | 2508.24464     | 1254.62596      | 836.75306       | Y        | 1816.87123     | 908.93925       | 606.29526       | 16 |
| 22 | 2609.29232     | 1305.14980      | 870.43562       | T        | 1653.80791     | 827.40759       | 551.94082       | 15 |
| 23 | 2724.31927     | 1362.66327      | 908.77794       | D        | 1552.76023     | 776.88375       | 518.25826       | 14 |
| 24 | 2837.40334     | 1419.20531      | 946.47263       | L        | 1437.73328     | 719.37028       | 479.91594       | 13 |
| 25 | 2936.47176     | 1468.73952      | 979.49544       | V        | 1324.64921     | 662.82824       | 442.22125       | 12 |
| 26 | 3037.51944     | 1519.26336      | 1013.17800      | T        | 1225.58079     | 613.29403       | 409.19845       | 11 |
| 27 | 3151.56237     | 1576.28482      | 1051.19231      | N        | 1124.53311     | 562.77019       | 375.51589       | 10 |
| 28 | 3264.64644     | 1632.82686      | 1088.88700      | I        | 1010.49018     | 505.74873       | 337.50158       | 9  |
| 29 | 3427.70976     | 1714.35852      | 1143.24144      | Y        | 897.40611      | 449.20669       | 299.80689       | 8  |
| 30 | 3528.75744     | 1764.88236      | 1176.92400      | T        | 734.34279      | 367.67503       | 245.45245       | 7  |
| 31 | 3615.78947     | 1808.39837      | 1205.93467      | S        | 633.29511      | 317.15119       | 211.76989       | 6  |
| 32 | 3672.81094     | 1836.90911      | 1224.94183      | G        | 546.26308      | 273.63518       | 182.75921       | 5  |
| 33 | 3729.83241     | 1865.41984      | 1243.94899      | G        | 489.24161      | 245.12444       | 163.75205       | 4  |
| 34 | 3858.87501     | 1929.94114      | 1286.96319      | E        | 432.22014      | 216.61371       | 144.74490       | 3  |
| 35 | 3986.93359     | 1993.97043      | 1329.64938      | Q        | 303.17754      | 152.09241       | 101.73070       | 2  |
| 36 |                |                 |                 | R        | 175.11896      | 88.06312        | 59.04450        | 1  |

Extracted from: Z:\712AB\SK17-S (Ac)\Chichi-Abaumannii-SK17-S-Acetyl\_DrWu\_20140703.raw #29988 RT: 83.61  
 ITMS, CID@35.00, z=+3, Mono m/z=1387.68506 Da, MH+=4161.04062 Da, Match Tol.=0.6 Da

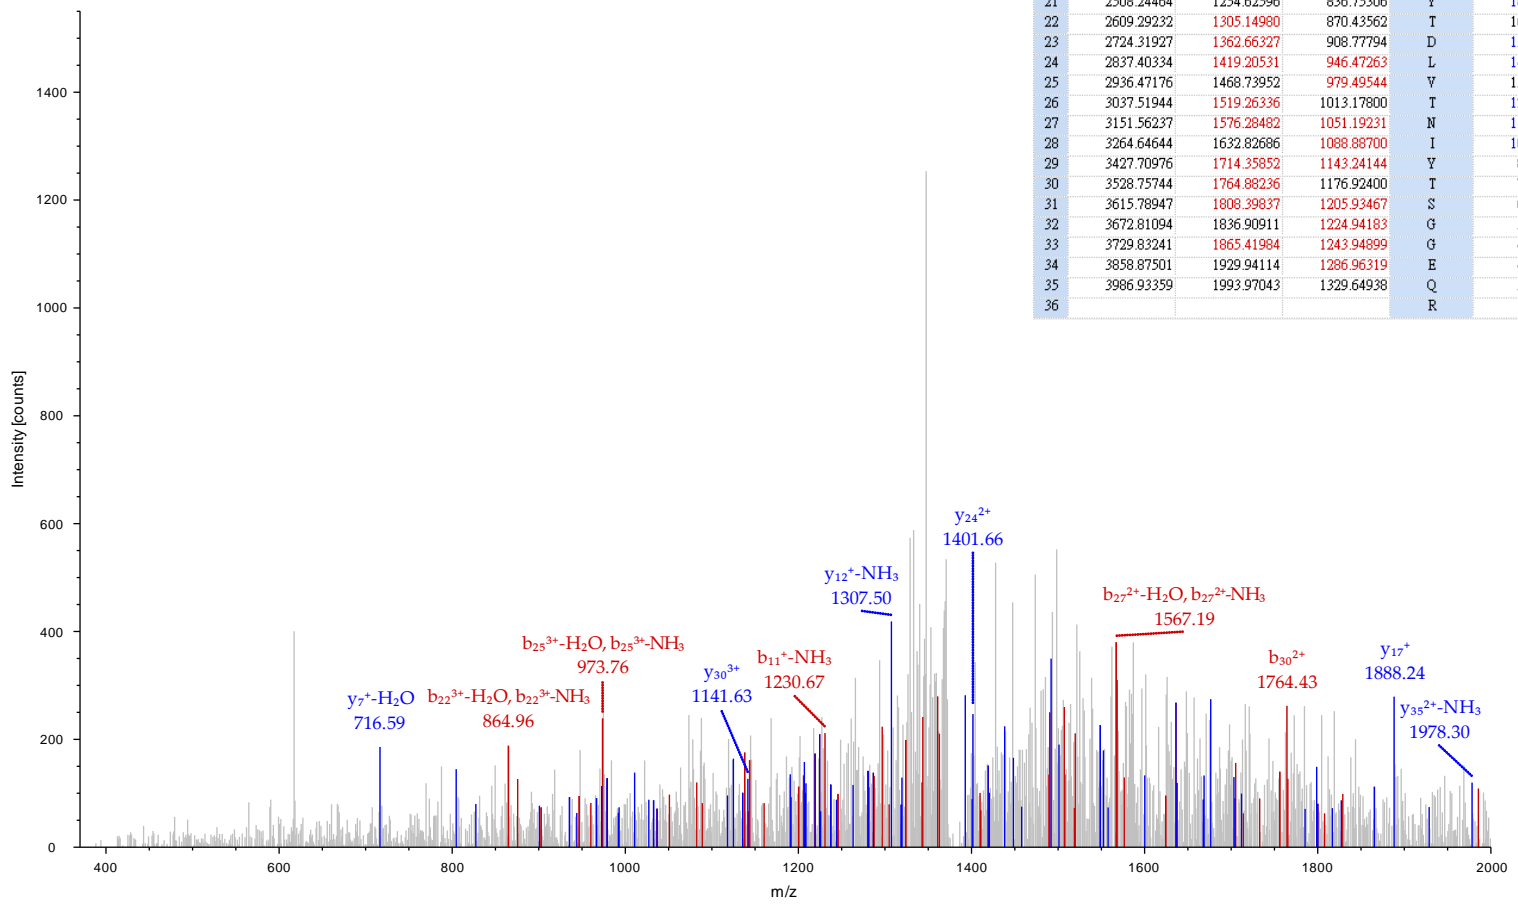

# peg.905 21846

| #1 | b <sup>+</sup> | b <sup>2+</sup> | b <sup>3+</sup> | Seq.     | y <sup>+</sup> | y <sup>2+</sup> | y <sup>3+</sup> | #2 |
|----|----------------|-----------------|-----------------|----------|----------------|-----------------|-----------------|----|
| 1  | 100.03931      | 50.52329        | 34.01795        | G-Acetyl |                |                 |                 | 23 |
| 2  | 213.12338      | 107.06533       | 71.71264        | L        | 2731.38011     | 1366.19369      | 911.13155       | 22 |
| 3  | 376.18670      | 188.59699       | 126.06708       | Y        | 2618.29604     | 1309.65166      | 873.43686       | 21 |
| 4  | 539.25002      | 270.12865       | 180.42152       | Y        | 2455.23272     | 1228.12000      | 819.08242       | 20 |
| 5  | 640.29770      | 320.65249       | 214.10408       | T        | 2292.16940     | 1146.58834      | 764.72798       | 19 |
| 6  | 796.39882      | 398.70305       | 266.13779       | R        | 2191.12172     | 1096.06450      | 731.04542       | 18 |
| 7  | 895.46724      | 448.23726       | 299.16060       | V        | 2035.02060     | 1018.01394      | 679.01172       | 17 |
| 8  | 982.49927      | 491.75327       | 328.17127       | S        | 1935.95218     | 968.47973       | 645.98891       | 16 |
| 9  | 1111.54187     | 556.27457       | 371.18547       | E        | 1848.92015     | 924.96371       | 616.97823       | 15 |
| 10 | 1242.58237     | 621.79482       | 414.86564       | M        | 1719.87755     | 860.44241       | 573.96403       | 14 |
| 11 | 1355.66644     | 678.33686       | 452.56033       | L        | 1588.83705     | 794.92216       | 530.28387       | 13 |
| 12 | 1412.68791     | 706.84759       | 471.56749       | G        | 1475.75298     | 738.38013       | 492.58918       | 12 |
| 13 | 1541.73051     | 771.36889       | 514.58169       | E        | 1418.73151     | 709.86939       | 473.58202       | 11 |
| 14 | 1711.83605     | 856.42166       | 571.28353       | K-Acetyl | 1289.68891     | 645.34809       | 430.56782       | 10 |
| 15 | 1858.90447     | 929.95587       | 620.30634       | F        | 1119.58337     | 560.29532       | 373.86597       | 9  |
| 16 | 1995.96338     | 998.48533       | 665.99264       | H        | 972.51495      | 486.76111       | 324.84317       | 8  |
| 17 | 2109.04745     | 1055.02736      | 703.68733       | I        | 835.45604      | 418.23166       | 279.15686       | 7  |
| 18 | 2224.07440     | 1112.54084      | 742.02965       | D        | 722.37197      | 361.68962       | 241.46217       | 6  |
| 19 | 2353.11700     | 1177.06214      | 785.04385       | E        | 607.34502      | 304.17615       | 203.11986       | 5  |
| 20 | 2424.15412     | 1212.58070      | 808.72289       | A        | 478.30242      | 239.65485       | 160.10566       | 4  |
| 21 | 2571.22254     | 1286.11491      | 857.74570       | F        | 407.26530      | 204.13629       | 136.42662       | 3  |
| 22 | 2684.30661     | 1342.65694      | 895.44039       | L        | 260.19688      | 130.60208       | 87.40381        | 2  |
| 23 |                |                 |                 | K        | 147.11281      | 74.06004        | 49.70912        | 1  |

Extracted from: Z:\712AB\SK17-S (Ac)\Chichi-Abaumannii-SK17-S-Acetyl\_DrWu\_20140512.raw #21846 RT: 66.03  
 ITMS, CID@35.00, z=+3, Mono m/z=944.14362 Da, MH+=2830.41629 Da, Match Tol.=0.6 Da

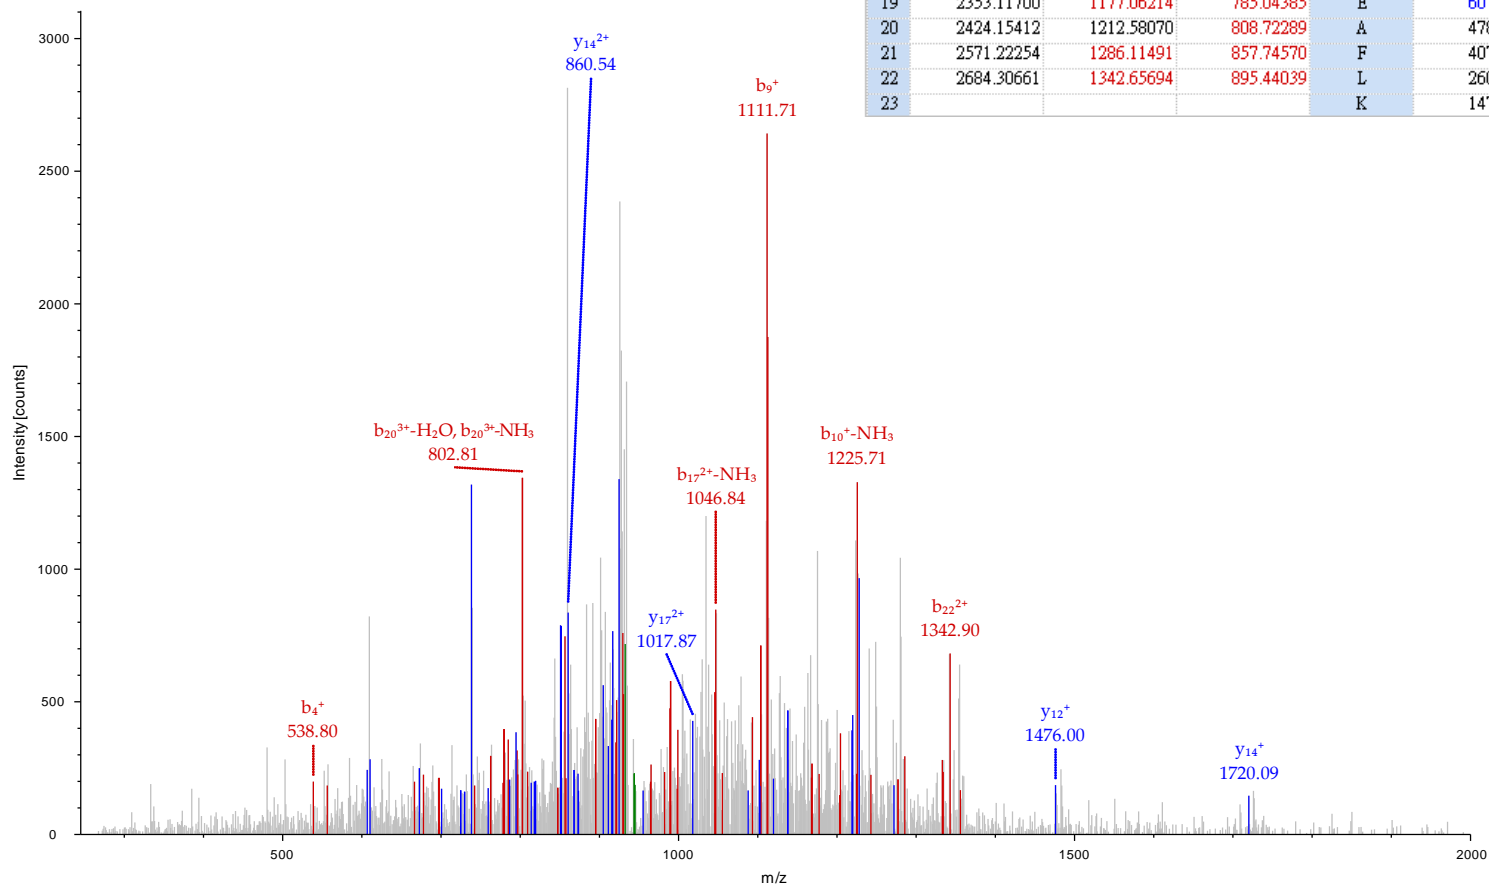

# peg.964 28708

| #1 | b <sup>+</sup> | b <sup>2+</sup> | b <sup>3+</sup> | Seq.     | y <sup>+</sup> | y <sup>2+</sup> | y <sup>3+</sup> | #2 |
|----|----------------|-----------------|-----------------|----------|----------------|-----------------|-----------------|----|
| 1  | 100.03931      | 50.52329        | 34.01795        | G-Acetyl |                |                 |                 | 37 |
| 2  | 213.12338      | 107.06533       | 71.71264        | I        | 3979.24950     | 1990.12839      | 1327.08802      | 36 |
| 3  | 314.17106      | 157.58917       | 105.39520       | T        | 3866.16543     | 1933.58635      | 1289.39333      | 35 |
| 4  | 411.22383      | 206.11555       | 137.74613       | P        | 3765.11775     | 1883.06251      | 1255.71077      | 34 |
| 5  | 526.25078      | 263.62903       | 176.08844       | D        | 3668.06498     | 1834.53613      | 1223.35984      | 33 |
| 6  | 639.33485      | 320.21706       | 213.78313       | L        | 3553.03803     | 1777.02265      | 1185.01753      | 32 |
| 7  | 776.39376      | 388.70052       | 259.46944       | H        | 3439.95396     | 1720.48062      | 1147.32284      | 31 |
| 8  | 890.43669      | 445.21998       | 297.48375       | N        | 3302.89505     | 1651.95116      | 1101.63653      | 30 |
| 9  | 947.45816      | 474.23272       | 316.49090       | G        | 3188.85212     | 1594.92970      | 1063.62222      | 29 |
| 10 | 1034.49019     | 517.74873       | 345.50158       | S        | 3131.83065     | 1566.41896      | 1044.61507      | 28 |
| 11 | 1147.57426     | 574.29077       | 383.19627       | L        | 3044.79862     | 1522.90295      | 1015.60439      | 27 |
| 12 | 1294.64268     | 647.82498       | 432.21908       | F        | 2931.71455     | 1466.36091      | 977.90970       | 26 |
| 13 | 1407.72675     | 704.36701       | 469.91377       | I        | 2784.64613     | 1392.82670      | 928.88689       | 25 |
| 14 | 1520.81082     | 760.90905       | 507.60846       | L        | 2671.56206     | 1336.28467      | 891.19220       | 24 |
| 15 | 1607.84285     | 804.42506       | 536.61913       | S        | 2558.47799     | 1279.74263      | 853.49751       | 23 |
| 16 | 1720.92692     | 860.96710       | 574.31382       | L        | 2471.44596     | 1236.22662      | 824.48684       | 22 |
| 17 | 1834.01099     | 917.50913       | 612.00851       | L        | 2358.36189     | 1179.68458      | 786.79215       | 21 |
| 18 | 1965.05149     | 983.02938       | 655.68868       | M        | 2245.27782     | 1123.14255      | 749.09746       | 20 |
| 19 | 2112.11991     | 1056.56359      | 704.71149       | F        | 2114.23732     | 1057.62230      | 705.41729       | 19 |
| 20 | 2183.15703     | 1092.08215      | 728.39053       | A        | 1967.16890     | 984.08809       | 656.39448       | 18 |
| 21 | 2240.17850     | 1120.59289      | 747.39768       | G        | 1896.13178     | 948.56953       | 632.71544       | 17 |
| 22 | 2396.27962     | 1198.64345      | 799.43139       | R        | 1839.11031     | 920.05879       | 613.70829       | 16 |
| 23 | 2509.36369     | 1255.18548      | 837.12608       | L        | 1683.00919     | 842.00823       | 561.67458       | 15 |
| 24 | 2566.38516     | 1283.69622      | 856.13324       | G        | 1569.92512     | 785.46620       | 523.97989       | 14 |
| 25 | 2663.43793     | 1332.22260      | 888.48416       | P        | 1512.90365     | 756.95546       | 504.97273       | 13 |
| 26 | 2776.52200     | 1388.76464      | 926.17885       | L        | 1415.85088     | 708.42908       | 472.62181       | 12 |
| 27 | 2877.56968     | 1439.28848      | 959.86141       | T        | 1302.76681     | 651.88704       | 434.92712       | 11 |
| 28 | 2990.65375     | 1495.83051      | 997.55610       | L        | 1201.71913     | 601.36320       | 401.24456       | 10 |
| 29 | 3061.69087     | 1531.34907      | 1021.23514      | A        | 1088.63506     | 544.82117       | 363.54987       | 9  |
| 30 | 3224.75419     | 1612.88073      | 1075.58958      | Y        | 1017.59794     | 509.30261       | 339.87083       | 8  |
| 31 | 3337.83826     | 1669.42277      | 1113.28427      | L        | 854.53462      | 427.77095       | 285.51639       | 7  |
| 32 | 3450.92233     | 1725.96480      | 1150.97896      | I        | 741.45055      | 371.22891       | 247.82170       | 6  |
| 33 | 3521.95945     | 1761.48336      | 1174.65800      | A        | 628.36648      | 314.68688       | 210.12701       | 5  |
| 34 | 3623.00713     | 1812.00720      | 1208.34056      | T        | 557.32936      | 279.16832       | 186.44797       | 4  |
| 35 | 3720.05990     | 1860.53359      | 1240.69148      | P        | 456.28168      | 228.64448       | 152.76541       | 3  |
| 36 | 3890.16544     | 1945.58636      | 1297.39333      | K-Acetyl | 359.22891      | 180.11809       | 120.41449       | 2  |
| 37 |                |                 |                 | K-Acetyl | 189.12338      | 95.06533        | 63.71264        | 1  |

Extracted from: Z:\712AB\SK17-S (Ac)\Chichi-Abaumannii-SK17-R-Acetyl\_DrWu\_20140703.raw #28708 RT: 78.91  
 ITMS, CID@35.00, z=+3, Mono m/z=1360.09888 Da, MH+=4078.28208 Da, Match Tol.=0.6 Da

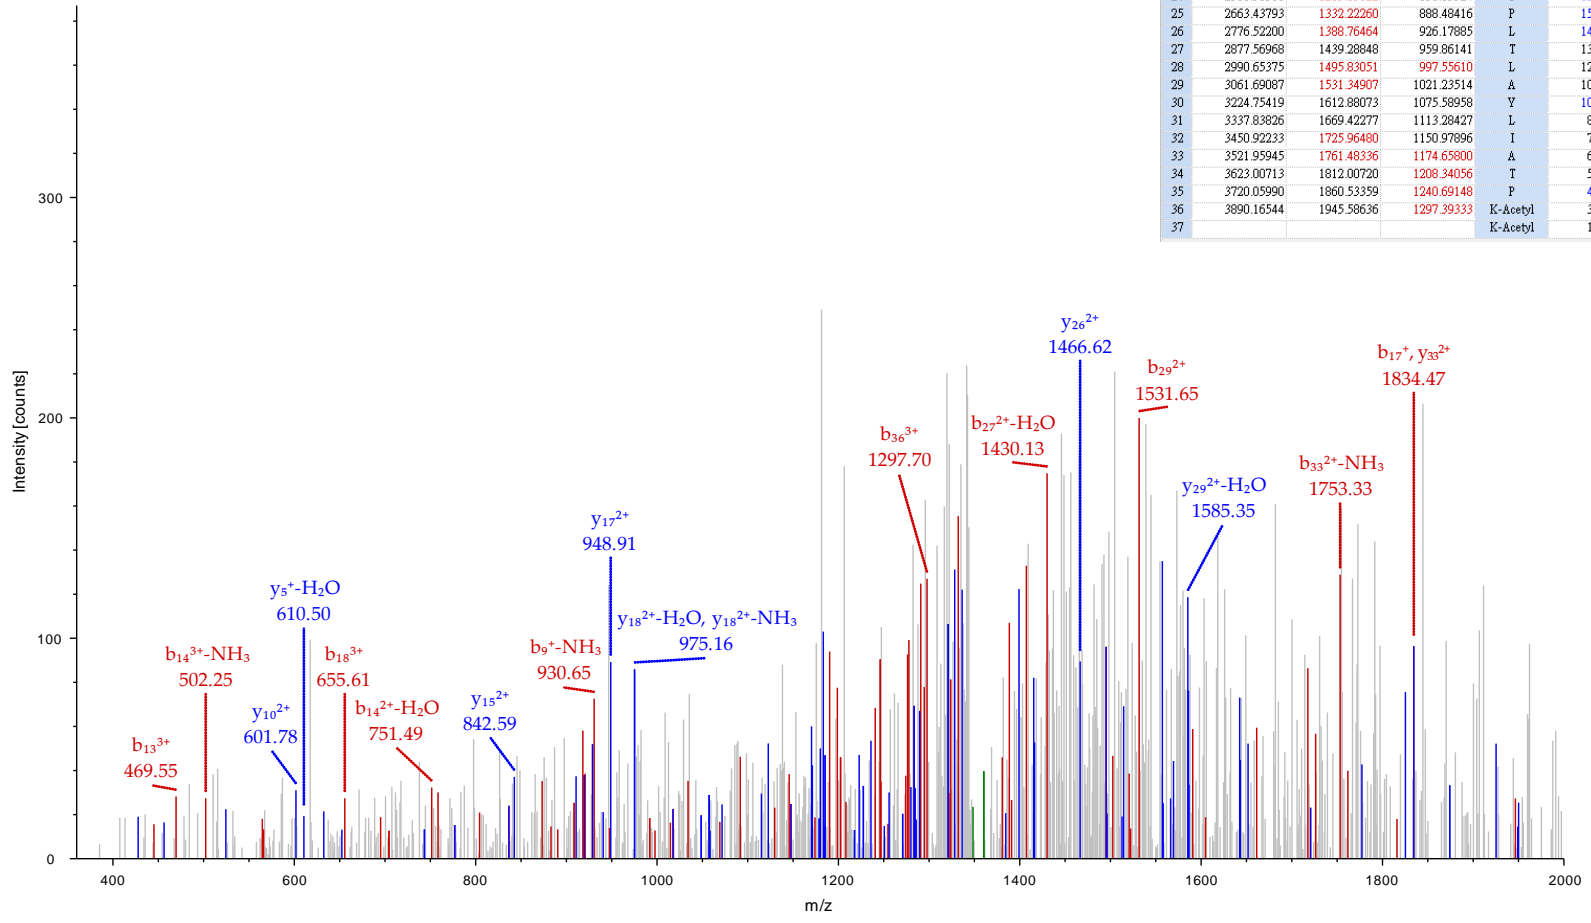

Supplement: DataSheet1.pdf [file DataSheet1.pdf]
